# Supplementary material for: Endogenous Neoantigen-Specific CD8 T Cells Identified in Two Glioblastoma Models Using a Cancer Immunogenomics Approach
Source: Oxford University Press journal article supplement (doi:10.1158/2326-6066.cir-16-0156), 2016-10-31
Supplement: 23266066cir160156-sup-168645_1_supp_3688174_yyg2yv.xlsx [file 23266066cir160156-sup-168645_1_supp_3688174_yyg2yv.xlsx]

## Sheet: Full Variant Calls & RNAseq
chromosome_name	start	stop	reference	variant	type	gene_name	transcript_name	transcript_species	transcript_source	transcript_version	strand	transcript_status	trv_type	c_position	amino_acid_change	ucsc_cons	domain	all_domains	deletion_substructures	transcript_error	default_gene_name	gene_name_source	ensembl_gene_id	Normal_ref_count	Normal_var_count	Normal_VAF	Tumor_ref_count	Tumor_var_count	Tumor_VAF	FilterCall	Prob	LLR	ref_count	var_count	VAF
1	4482363	4482363	G	T	SNP	Sox17	NM_011441.4	mouse	genbank	58_37k	-1	provisional	missense	c.694	p.Q232K	-	NULL	HMMSmart_SM00398	-	no_errors	Unknown	Unknown	Unknown	21	0	0	7	12	63.16	Somatic	0.999992	11.7194	0	0	0
1	4766508	4766508	C	A	SNP	Mrpl15	ENSMUST00000115538	mouse	ensembl	58_37k	-1	known	5_prime_untranslated_region	c.-4766508	NULL	-	-	-	-	no_coding_region	Unknown	Unknown	Unknown	43	0	0	13	15	53.57	Somatic	1	16.841	139	128	47.76
1	4906835	4906835	A	T	SNP	Rgs20	NM_021374.4	mouse	genbank	58_37k	-1	validated	intronic	c.296+143	e3+143	-	-	-	-	no_errors	Unknown	Unknown	Unknown	24	0	0	11	11	50	Somatic	0.999945	9.81303	0	0	0
1	6797532	6797532	C	A	SNP	St18	NM_173868.1	mouse	genbank	58_37k	1	provisional	intronic	c.1064-92	e5-92	-	-	-	-	no_errors	Unknown	Unknown	Unknown	32	0	0	15	6	28.57	Somatic	0.997078	5.83271	0	0	0
1	7167919	7167919	C	T	SNP	ENSMUSG00000048538	ENSMUST00000029124	mouse	ensembl	58_37k	1	known	missense	c.100	p.R34C	-	HMMPfam_AdoHcyase,superfamily_SSF52283	HMMPfam_AdoHcyase,superfamily_SSF52283	-	no_stop_codon	Unknown	Unknown	Unknown	30	0	0	10	13	56.52	Somatic	0.999999	13.4783	15	0	0
1	8573409	8573409	G	T	SNP	Sntg1	NM_027671.4	mouse	genbank	58_37k	-1	validated	missense	c.687	p.N229K	-	HMMSmart_PH	HMMPfam_PDZ,HMMSmart_PDZ,superfamily_PDZ,HMMSmart_PH,superfamily_SSF50729	-	no_errors	Unknown	Unknown	Unknown	47	0	0	16	23	57.5	Somatic	1	23.0665	0	0	0
1	9714599	9714599	C	G	SNP	Vcpip1	NM_173443.2	mouse	genbank	58_37k	-1	provisional	missense	c.3627	p.E1209D	-	NULL	HMMPfam_OTU,superfamily_Ubiquitin-like	-	no_errors	Unknown	Unknown	Unknown	241	0	0	114	133	53.63	Somatic	1	112.958	59	58	49.57
1	9727012	9727012	C	A	SNP	Vcpip1	NM_173443.2	mouse	genbank	58_37k	-1	provisional	intronic	c.2794+35	e2+35	-	-	-	-	no_errors	Unknown	Unknown	Unknown	55	0	0	45	11	19.64	Somatic	0.999484	7.56818	1	0	0
1	9906468	9906468	A	T	SNP	6030422M02Rik	ENSMUST00000118098	mouse	ensembl	58_37k	1	known	missense	c.553	p.S185C	-	NULL	NULL	-	no_errors	Unknown	Unknown	Unknown	85	0	0	28	22	44	Somatic	1	24.8636	0	0	0
1	10709701	10709701	G	A	SNP	Cpa6	NM_177834.3	mouse	genbank	58_37k	-1	provisional	silent	c.108	p.R36	-	superfamily_Protease propeptides/inhibitors	HMMPfam_Peptidase_M14,HMMSmart_SM00631,PatternScan_CARBOXYPEPT_ZN_2,HMMPfam_Propep_M14,superfamily_Protease propeptides/inhibitors,superfamily_Zn-dependent exopeptidases	-	no_errors	Unknown	Unknown	Unknown	47	0	0	28	9	24.32	Somatic	0.999501	7.6024	0	0	0
1	11051290	11051290	G	T	SNP	Prex2	ENSMUST00000027056	mouse	ensembl	58_37k	1	known	intronic	c.118-117	e2-117	-	-	-	-	no_errors	Unknown	Unknown	Unknown	14	0	0	4	4	50	Somatic	0.99131	4.74518	0	0	0
1	11255652	11255652	C	A	SNP	Prex2	NM_001033636.4	mouse	genbank	58_37k	1	validated	intronic	c.1-108	e1-108	-	-	-	-	no_errors	Unknown	Unknown	Unknown	30	0	0	11	9	45	Somatic	0.999926	9.50539	0	0	0
1	14219747	14219747	G	T	SNP	Eya1	NM_010164.2	mouse	genbank	58_37k	-1	provisional	intronic	c.952-90	e9-90	-	-	-	-	no_errors	Unknown	Unknown	Unknown	26	0	0	11	11	50	Somatic	0.999967	10.3263	0	0	0
1	14264151	14264151	G	T	SNP	Eya1	NM_010164.2	mouse	genbank	58_37k	-1	provisional	missense	c.413	p.S138Y	-	NULL	HMMPfam_Hydrolase	-	no_errors	Unknown	Unknown	Unknown	73	0	0	35	36	50.7	Somatic	1	31.0362	4	2	33.33
1	15699752	15699752	C	A	SNP	Kcnb2	XM_001473804.1	mouse	genbank	58_37k	1	model	missense	c.766	p.P256T	-	HMMPfam_Ion_trans,superfamily_Voltage-gated potassium channels	HMMSmart_SM00225,HMMPfam_K_tetra,HMMPfam_Kv2channel,HMMPfam_Ion_trans,superfamily_POZ domain,superfamily_Voltage-gated potassium channels	-	no_errors	Unknown	Unknown	Unknown	70	0	0	35	24	40.68	Somatic	1	21.4089	0	0	0
1	15699838	15699838	C	A	SNP	Kcnb2	XM_001473804.1	mouse	genbank	58_37k	1	model	silent	c.852	p.T284	-	HMMPfam_Ion_trans,superfamily_Voltage-gated potassium channels	HMMSmart_SM00225,HMMPfam_K_tetra,HMMPfam_Kv2channel,HMMPfam_Ion_trans,superfamily_POZ domain,superfamily_Voltage-gated potassium channels	-	no_errors	Unknown	Unknown	Unknown	66	0	0	22	24	52.17	Somatic	1	25.6883	0	0	0
1	15701578	15701578	C	A	SNP	Kcnb2	XM_001473804.1	mouse	genbank	58_37k	1	model	nonsense	c.2592	p.Y864*	-	NULL	HMMSmart_SM00225,HMMPfam_K_tetra,HMMPfam_Kv2channel,HMMPfam_Ion_trans,superfamily_POZ domain,superfamily_Voltage-gated potassium channels	-	no_errors	Unknown	Unknown	Unknown	53	0	0	28	19	40.43	Somatic	1	16.3788	0	0	0
1	17151333	17151333	C	A	SNP	Gdap1	NM_010267.3	mouse	genbank	58_37k	1	validated	missense	c.820	p.P274T	-	HMMPfam_GST_C,superfamily_Glutathione S-transferase (GST) C-terminal domain	HMMPfam_GST_N,HMMPfam_GST_C,superfamily_Glutathione S-transferase (GST) C-terminal domain,superfamily_Thioredoxin-like	-	no_errors	Unknown	Unknown	Unknown	78	0	0	27	26	49.06	Somatic	1	27.7632	0	0	0
1	19218592	19218592	G	T	SNP	Tcfap2b	NM_009334.2	mouse	genbank	58_37k	1	validated	silent	c.891	p.A297	-	HMMPfam_TF_AP-2	HMMPfam_TF_AP-2	-	no_errors	Unknown	Unknown	Unknown	70	0	0	22	17	43.59	Somatic	1	19.7729	0	0	0
1	20093408	20093408	A	T	SNP	Pkhd1	NM_153179.3	mouse	genbank	58_37k	-1	validated	intronic	c.11290-25	e62-25	-	-	-	-	no_errors	Unknown	Unknown	Unknown	68	0	0	20	15	42.86	Somatic	1	18.1655	0	0	0
1	20199311	20199311	G	T	SNP	Pkhd1	NM_153179.3	mouse	genbank	58_37k	-1	validated	missense	c.8863	p.P2955T	-	NULL	HMMPfam_TIG,HMMSmart_SM00429,HMMSmart_SM00710,superfamily_Pectin lyase-like,superfamily_E set domains,PatternScan_EF_HAND_1,HMMPfam_G8,superfamily_Anthrax protective antigen	-	no_errors	Unknown	Unknown	Unknown	54	0	0	17	20	54.05	Somatic	1	21.8559	0	0	0
1	20229518	20229518	G	T	SNP	Pkhd1	NM_153179.3	mouse	genbank	58_37k	-1	validated	missense	c.8286	p.N2762K	-	HMMPfam_G8	HMMPfam_TIG,HMMSmart_SM00429,HMMSmart_SM00710,superfamily_Pectin lyase-like,superfamily_E set domains,PatternScan_EF_HAND_1,HMMPfam_G8,superfamily_Anthrax protective antigen	-	no_errors	Unknown	Unknown	Unknown	82	0	0	28	41	59.42	Somatic	1	40.8807	0	0	0
1	20926742	20926742	G	T	SNP	Paqr8	NM_028829.3	mouse	genbank	58_37k	1	provisional	3_prime_untranslated_region	c.*973	NULL	-	-	-	-	no_errors	Unknown	Unknown	Unknown	50	0	0	19	23	54.76	Somatic	1	22.3109	24	20	45.45
1	21252975	21252975	G	T	SNP	Gsta3	NM_001077353.1	mouse	genbank	58_37k	1	validated	silent	c.516	p.P172	-	HMMPfam_GST_C,superfamily_Glutathione S-transferase (GST) C-terminal domain	HMMPfam_GST_N,HMMPfam_GST_C,superfamily_Glutathione S-transferase (GST) C-terminal domain,superfamily_Thioredoxin-like	-	no_errors	Unknown	Unknown	Unknown	92	0	0	52	66	55.93	Somatic	1	48.8387	1	5	83.33
1	21281443	21281443	T	C	SNP	ENSMUSG00000025936	ENSMUST00000034901	mouse	ensembl	58_37k	-1	known	missense	c.329	p.E110G	-	HMMPfam_GST_C,superfamily_Glutathione S-transferase (GST) C-terminal domain	HMMPfam_GST_N,HMMPfam_GST_C,superfamily_Glutathione S-transferase (GST) C-terminal domain,superfamily_Thioredoxin-like	-	no_errors	Unknown	Unknown	Unknown	37	0	0	25	16	39.02	Somatic	0.999992	11.7845	0	0	0
1	22282911	22282911	G	T	SNP	Rims1	ENSMUST00000097811	mouse	ensembl	58_37k	-1	known	missense	c.3605	p.P1202Q	-	superfamily_C2 domain (Calcium/lipid-binding domain CaLB)	HMMPfam_C2,HMMSmart_SM00239,HMMPfam_PDZ,HMMSmart_SM00228,superfamily_PDZ domain-like,superfamily_C2 domain (Calcium/lipid-binding domain CaLB),superfamily_FYVE/PHD zinc finger,PatternScan_GLYCOSYL_HYDROL_F1_1,PatternScan_ATPASE_ALPHA_BETA	-	no_errors	Unknown	Unknown	Unknown	93	0	0	37	29	43.94	Somatic	1	29.3284	0	0	0
1	22282913	22282913	G	T	SNP	Rims1	ENSMUST00000097811	mouse	ensembl	58_37k	-1	known	silent	c.3603	p.T1201	-	superfamily_C2 domain (Calcium/lipid-binding domain CaLB)	HMMPfam_C2,HMMSmart_SM00239,HMMPfam_PDZ,HMMSmart_SM00228,superfamily_PDZ domain-like,superfamily_C2 domain (Calcium/lipid-binding domain CaLB),superfamily_FYVE/PHD zinc finger,PatternScan_GLYCOSYL_HYDROL_F1_1,PatternScan_ATPASE_ALPHA_BETA	-	no_errors	Unknown	Unknown	Unknown	95	0	0	37	29	43.94	Somatic	1	29.7082	0	0	0
1	24238170	24238170	G	T	SNP	Col9a1	NM_007740.3	mouse	genbank	58_37k	1	validated	intronic	c.1999-120	e31-120	-	-	-	-	no_errors	Unknown	Unknown	Unknown	38	0	0	14	18	56.25	Somatic	1	17.5913	0	0	0
1	24296601	24296601	G	C	SNP	Col19a1	NM_007733.2	mouse	genbank	58_37k	-1	validated	intronic	c.2695-33	e43-33	-	-	-	-	no_errors	Unknown	Unknown	Unknown	95	0	0	39	42	51.85	Somatic	1	39.6684	0	0	0
1	24332827	24332827	T	G	SNP	Col19a1	NM_007733.2	mouse	genbank	58_37k	-1	validated	silent	c.1545	p.P515	-	HMMPfam_Collagen	HMMSmart_TSPN,HMMPfam_Collagen,superfamily_ConA_like_lec_gl	-	no_errors	Unknown	Unknown	Unknown	89	0	0	44	23	34.33	Somatic	1	21.2566	0	0	0
1	24334805	24334805	G	A	SNP	Col19a1	NM_007733.2	mouse	genbank	58_37k	-1	validated	intronic	c.1464+70	e19+70	-	-	-	-	no_errors	Unknown	Unknown	Unknown	42	0	0	14	5	26.32	Somatic	0.997328	5.92396	0	0	0
1	24416926	24416926	G	A	SNP	Col19a1	NM_007733.2	mouse	genbank	58_37k	-1	validated	intronic	c.1215+109	e14+109	-	-	-	-	no_errors	Unknown	Unknown	Unknown	54	0	0	20	29	59.18	Somatic	1	27.549	0	0	0
1	24785559	24785559	G	T	SNP	Lmbrd1	NM_026719.2	mouse	genbank	58_37k	1	validated	intronic	c.753+43	e8+43	-	-	-	-	no_errors	Unknown	Unknown	Unknown	17	0	0	6	10	62.5	Somatic	0.999919	9.48666	0	0	0
1	24800909	24800909	G	T	SNP	Lmbrd1	NM_026719.2	mouse	genbank	58_37k	1	validated	intronic	c.971+117	e10+117	-	-	-	-	no_errors	Unknown	Unknown	Unknown	29	0	0	5	12	70.59	Somatic	1	15.8123	4	3	42.86
1	32675913	32675913	C	G	SNP	Khdrbs2	NM_133235.2	mouse	genbank	58_37k	1	reviewed	intronic	c.811-103	e7-103	-	-	-	-	no_errors	Unknown	Unknown	Unknown	29	0	0	9	8	47.06	Somatic	0.9999	9.20816	0	0	0
1	33910173	33910173	A	T	SNP	Bend6	ENSMUST00000129464	mouse	ensembl	58_37k	-1	known	5_prime_untranslated_region	c.-33910173	NULL	-	-	-	-	no_coding_region	Unknown	Unknown	Unknown	39	0	0	11	14	56	Somatic	1	16.0804	59	45	43.27
1	34221082	34221082	G	T	SNP	Dst	NM_134448.2	mouse	genbank	58_37k	1	validated	silent	c.2226	p.A742	-	HMMPfam_Spectrin,HMMSmart_SM00150,superfamily_Spectrin repeat	HMMPfam_Plectin,HMMSmart_SM00250,PatternScan_ACTININ_1,PatternScan_ACTININ_2,HMMPfam_CH,HMMSmart_SM00033,HMMPfam_Spectrin,HMMSmart_SM00054,HMMPfam_GAS2,HMMSmart_SM00243,superfamily_Calponin-homology domain CH-domain,HMMSmart_SM00150,PatternScan_EF_HAND_1,	-	no_errors	Unknown	Unknown	Unknown	36	1	2.7	15	18	54.55	Somatic	0.999998	13.2229	218	156	41.71
1	34319047	34319047	G	T	SNP	Dst	NM_134448.2	mouse	genbank	58_37k	1	validated	missense	c.17796	p.E5932D	-	HMMPfam_Spectrin,HMMSmart_SM00150,superfamily_Spectrin repeat	HMMPfam_Plectin,HMMSmart_SM00250,PatternScan_ACTININ_1,PatternScan_ACTININ_2,HMMPfam_CH,HMMSmart_SM00033,HMMPfam_Spectrin,HMMSmart_SM00054,HMMPfam_GAS2,HMMSmart_SM00243,superfamily_Calponin-homology domain CH-domain,HMMSmart_SM00150,PatternScan_EF_HAND_1,	-	no_errors	Unknown	Unknown	Unknown	16	0	0	18	9	33.33	Somatic	0.991104	4.71364	220	163	42.34
1	34359817	34359817	G	T	SNP	Dst	NM_134448.2	mouse	genbank	58_37k	1	validated	silent	c.21735	p.A7245	-	NULL	HMMPfam_Plectin,HMMSmart_SM00250,PatternScan_ACTININ_1,PatternScan_ACTININ_2,HMMPfam_CH,HMMSmart_SM00033,HMMPfam_Spectrin,HMMSmart_SM00054,HMMPfam_GAS2,HMMSmart_SM00243,superfamily_Calponin-homology domain CH-domain,HMMSmart_SM00150,PatternScan_EF_HAND_1,	-	no_errors	Unknown	Unknown	Unknown	37	0	0	21	23	52.27	Somatic	1	17.5035	195	189	48.96
1	34363289	34363289	C	G	SNP	Dst	NM_134448.2	mouse	genbank	58_37k	1	validated	intronic	c.21796-84	e97-84	-	-	-	-	no_errors	Unknown	Unknown	Unknown	20	0	0	5	9	64.29	Somatic	0.999967	10.3237	2	1	33.33
1	34614598	34614598	G	T	SNP	Prss40	NM_009356.2	mouse	genbank	58_37k	-1	validated	intronic	c.613+100	e3+100	-	-	-	-	no_errors	Unknown	Unknown	Unknown	41	0	0	27	16	37.21	Somatic	0.999994	12.106	0	0	0
1	34645991	34645991	C	A	SNP	Fam123c	NM_213727.2	mouse	genbank	58_37k	1	validated	3_prime_untranslated_region	c.*122	NULL	-	-	-	-	no_errors	Unknown	Unknown	Unknown	101	0	0	39	47	54.65	Somatic	1	45.1773	0	0	0
1	34646722	34646722	G	A	SNP	Fam123c	NM_213727.2	mouse	genbank	58_37k	1	validated	3_prime_untranslated_region	c.*853	NULL	-	-	-	-	no_errors	Unknown	Unknown	Unknown	76	0	0	23	34	59.65	Somatic	1	36.3982	0	0	0
1	36501924	36501924	C	A	SNP	Lman2l	NM_001013374.1	mouse	genbank	58_37k	-1	provisional	missense	c.155	p.R52L	-	HMMPfam_Lectin_leg-like,superfamily_ConA_like_lec_gl	HMMPfam_Lectin_leg-like,superfamily_ConA_like_lec_gl	-	no_errors	Unknown	Unknown	Unknown	6	0	0	4	5	55.56	Somatic	0.950204	3.30476	16	10	38.46
1	36642852	36642852	G	T	SNP	Fam178b	ENSMUST00000146594	mouse	ensembl	58_37k	-1	known	splice_region	c.918-4	e10-4	-	-	-	-	no_errors	Unknown	Unknown	Unknown	54	0	0	14	21	60	Somatic	1	24.529	0	0	0
1	36835913	36835913	C	A	SNP	Zap70	ENSMUST00000070299	mouse	ensembl	58_37k	1	known	silent	c.63	p.P21	-	NULL	HMMPfam_Pkinase_Tyr,HMMSmart_SM00219,HMMSmart_SM00220,PatternScan_PROTEIN_KINASE_TYR,superfamily_Protein kinase-like (PK-like)	-	no_errors	Unknown	Unknown	Unknown	80	1	1.23	49	47	48.96	Somatic	1	31.5146	0	0	0
1	36861405	36861405	C	A	SNP	Tmem131	NM_018872.2	mouse	genbank	58_37k	-1	validated	nonsense	c.4219	p.E1407*	-	NULL	NULL	-	no_errors	Unknown	Unknown	Unknown	71	0	0	34	27	44.26	Somatic	1	24.2834	51	6	10.34
1	36946267	36946267	C	T	SNP	Tmem131	NM_018872.2	mouse	genbank	58_37k	-1	validated	intronic	c.182-97	e2-97	-	-	-	-	no_errors	Unknown	Unknown	Unknown	30	0	0	11	14	56	Somatic	0.999999	13.7503	0	0	0
1	37435607	37435607	G	T	SNP	Inpp4a	NM_030266.3	mouse	genbank	58_37k	1	validated	intronic	c.1366-79	e14-79	-	-	-	-	no_errors	Unknown	Unknown	Unknown	39	0	0	15	30	66.67	Somatic	1	25.7125	0	2	100
1	37523504	37523504	G	T	SNP	Mgat4a	NM_173870.2	mouse	genbank	58_37k	-1	validated	intronic	c.538-76	e5-76	-	-	-	-	no_errors	Unknown	Unknown	Unknown	38	0	0	15	16	50	Somatic	1	15.5131	0	2	100
1	37680829	37680829	T	A	SNP	2010300C02Rik	ENSMUST00000114917	mouse	ensembl	58_37k	-1	known	silent	c.960	p.A320	-	NULL	NULL	-	no_stop_codon	Unknown	Unknown	Unknown	36	0	0	11	14	56	Somatic	1	15.3495	6	4	40
1	38266614	38266614	C	A	SNP	Aff3	XM_001477293.1	mouse	genbank	58_37k	-1	model	missense	c.2256	p.R752S	-	HMMPfam_AF-4	HMMPfam_AF-4	-	no_errors	Unknown	Unknown	Unknown	23	0	0	3	13	81.25	Somatic	1	16.8717	0	0	0
1	39390740	39390740	C	T	SNP	Npas2	NM_008719.2	mouse	genbank	58_37k	1	validated	missense	c.1226	p.S409L	-	NULL	HMMSmart_SM00091,HMMPfam_HLH,HMMSmart_SM00353,HMMSmart_SM00086,superfamily_HLH helix-loop-helix DNA-binding domain,HMMPfam_PAS_3,HMMPfam_PAS,superfamily_PYP-like sensor domain (PAS domain)	-	no_errors	Unknown	Unknown	Unknown	56	0	0	32	19	37.25	Somatic	1	15.8047	0	0	0
1	39395177	39395177	T	G	SNP	Npas2	NM_008719.2	mouse	genbank	58_37k	1	validated	intronic	c.1641+133	e15+133	-	-	-	-	no_errors	Unknown	Unknown	Unknown	15	0	0	4	6	60	Somatic	0.99896	6.89613	0	0	0
1	39434051	39434051	G	A	SNP	Tbc1d8	NM_018775.4	mouse	genbank	58_37k	-1	validated	intronic	c.2473-88	e16-88	-	-	-	-	no_errors	Unknown	Unknown	Unknown	14	0	0	7	8	53.33	Somatic	0.998541	6.57652	1	0	0
1	39442864	39442864	G	A	SNP	Tbc1d8	NM_018775.4	mouse	genbank	58_37k	-1	validated	silent	c.1749	p.N583	-	HMMPfam_TBC,HMMSmart_TBC,superfamily_RabGAP_TBC	HMMPfam_TBC,HMMSmart_TBC,superfamily_RabGAP_TBC,HMMPfam_GRAM,HMMSmart_GRAM,superfamily_SSF47473	-	no_errors	Unknown	Unknown	Unknown	17	0	0	4	8	66.67	Somatic	0.999901	9.27205	0	0	0
1	39752851	39752851	C	A	SNP	ENSMUSG00000057173	ENSMUST00000151913	mouse	ensembl	58_37k	-1	known	intronic	c.339-45	e5-45	-	-	-	-	no_errors	Unknown	Unknown	Unknown	19	0	0	9	7	43.75	Somatic	0.998268	6.3581	0	0	0
1	39752852	39752852	G	T	SNP	ENSMUSG00000057173	ENSMUST00000151913	mouse	ensembl	58_37k	-1	known	intronic	c.339-46	e5-46	-	-	-	-	no_errors	Unknown	Unknown	Unknown	18	0	0	9	7	43.75	Somatic	0.997849	6.14136	0	0	0
1	40045835	40045835	A	T	SNP	Map4k4	NM_008696.2	mouse	genbank	58_37k	1	validated	missense	c.970	p.S324C	-	NULL	HMMPfam_CNH,HMMSmart_SM00036,HMMSmart_SM00219,HMMSmart_SM00220,PatternScan_PROTEIN_KINASE_ST,superfamily_Protein kinase-like (PK-like),PatternScan_PROTEIN_KINASE_ATP,HMMPfam_Pkinase	-	no_errors	Unknown	Unknown	Unknown	34	0	0	24	19	44.19	Somatic	0.999998	13.1673	280	284	50.35
1	40071318	40071318	G	A	SNP	Map4k4	NM_008696.2	mouse	genbank	58_37k	1	validated	intronic	c.2621-54	e24-54	-	-	-	-	no_errors	Unknown	Unknown	Unknown	15	0	0	5	8	61.54	Somatic	0.999619	7.93917	3	1	25
1	40593959	40593959	G	T	SNP	Il18rap	NM_010553.3	mouse	genbank	58_37k	1	provisional	missense	c.784	p.V262L	-	HMMSmart_SM00409,superfamily_Immunoglobulin	HMMPfam_TIR,HMMSmart_SM00255,superfamily_Toll/Interleukin receptor TIR domain,HMMSmart_SM00409,superfamily_Immunoglobulin	-	no_errors	Unknown	Unknown	Unknown	68	0	0	39	44	53.01	Somatic	1	33.0483	129	128	49.81
1	40667324	40667324	T	G	SNP	Slc9a4	NM_177084.3	mouse	genbank	58_37k	1	provisional	intronic	c.1559+92	e7+92	-	-	-	-	no_errors	Unknown	Unknown	Unknown	27	0	0	5	9	64.29	Somatic	0.999995	12.1819	0	0	0
1	40818860	40818860	G	T	SNP	Slc9a2	NM_001033289.2	mouse	genbank	58_37k	1	provisional	missense	c.1704	p.M568I	-	NULL	HMMPfam_Na_H_Exchanger	-	no_errors	Unknown	Unknown	Unknown	29	0	0	16	13	44.83	Somatic	0.999976	10.6243	182	136	42.5
1	43089532	43089532	T	C	SNP	Gpr45	NM_053107.4	mouse	genbank	58_37k	1	validated	silent	c.489	p.S163	-	HMMPfam_7tm_1,superfamily_Family A G protein-coupled receptor-like	HMMPfam_7tm_1,superfamily_Family A G protein-coupled receptor-like	-	no_errors	Unknown	Unknown	Unknown	64	0	0	36	41	53.25	Somatic	1	31.1486	0	0	0
1	43089533	43089533	G	T	SNP	Gpr45	NM_053107.4	mouse	genbank	58_37k	1	validated	missense	c.490	p.A164S	-	HMMPfam_7tm_1,superfamily_Family A G protein-coupled receptor-like	HMMPfam_7tm_1,superfamily_Family A G protein-coupled receptor-like	-	no_errors	Unknown	Unknown	Unknown	63	0	0	36	41	53.25	Somatic	1	30.8136	0	0	0
1	44221000	44221000	G	T	SNP	Ercc5	NM_011729.2	mouse	genbank	58_37k	1	validated	intronic	c.880+71	e7+71	-	-	-	-	no_errors	Unknown	Unknown	Unknown	9	0	0	4	7	63.64	Somatic	0.995088	5.64818	0	0	0
1	44268050	44268054	GAAAG	-	DEL	4832428D23Rik	NM_207281.3	mouse	genbank	58_37k	-1	predicted	splice_region_del	c.47-11_47-7	e2-7	-	-	-	-	no_errors	Unknown	Unknown	Unknown	NA	NA	NA	NA	NA	NA	Somatic	NA	NA	NA	NA	NA
1	45395415	45395415	G	T	SNP	Col3a1	NM_009930.2	mouse	genbank	58_37k	1	validated	splice_region	c.2281-4	e33-4	-	-	-	-	no_errors	Unknown	Unknown	Unknown	130	0	0	62	59	48.76	Somatic	1	51.7347	2	6	75
1	45445019	45445019	T	G	SNP	Col5a2	NM_007737.2	mouse	genbank	58_37k	-1	validated	intronic	c.3141+39	e44+39	-	-	-	-	no_errors	Unknown	Unknown	Unknown	41	0	0	20	11	35.48	Somatic	0.999963	10.2056	1	1	50
1	45445065	45445065	C	A	SNP	Col5a2	NM_007737.2	mouse	genbank	58_37k	-1	validated	missense	c.3134	p.G1045V	-	HMMPfam_Collagen	HMMPfam_COLFI,HMMSmart_COLFI,HMMPfam_VWC,HMMSmart_VWC,PatternScan_VWFC_1,HMMPfam_Collagen	-	no_errors	Unknown	Unknown	Unknown	59	0	0	32	19	37.25	Somatic	1	16.3521	269	184	40.53
1	46379020	46379020	T	C	SNP	Dnahc7b	ENSMUST00000069293	mouse	ensembl	58_37k	1	known	intronic	c.853-75	e6-75	-	-	-	-	no_errors	Unknown	Unknown	Unknown	21	0	0	13	12	48	Somatic	0.999861	8.88264	0	0	0
1	46572237	46572237	T	C	SNP	Dnahc7a	ENSMUST00000094964	mouse	ensembl	58_37k	1	known	missense	c.1280	p.I427T	-	NULL	PatternScan_ADH_SHORT,HMMSmart_SM00382,HMMPfam_Dynein_heavy,HMMPfam_AAA_5,HMMPfam_DHC_N2,PatternScan_EF_HAND_1,superfamily_P-loop containing nucleoside triphosphate hydrolases	-	no_errors	Unknown	Unknown	Unknown	112	0	0	25	36	59.02	Somatic	1	46.065	0	0	0
1	46827025	46827025	C	T	SNP	Dnahc7a	ENSMUST00000094964	mouse	ensembl	58_37k	1	known	nonsense	c.10645	p.R3549*	-	HMMPfam_Dynein_heavy	PatternScan_ADH_SHORT,HMMSmart_SM00382,HMMPfam_Dynein_heavy,HMMPfam_AAA_5,HMMPfam_DHC_N2,PatternScan_EF_HAND_1,superfamily_P-loop containing nucleoside triphosphate hydrolases	-	no_errors	Unknown	Unknown	Unknown	236	0	0	88	112	56	Somatic	1	108.861	0	0	0
1	52141031	52141031	C	A	SNP	Stat4	NM_011487.4	mouse	genbank	58_37k	1	provisional	intronic	c.1251+64	e13+64	-	-	-	-	no_errors	Unknown	Unknown	Unknown	36	0	0	17	20	54.05	Somatic	1	16.9769	0	0	0
1	52546720	52546720	C	A	SNP	Nab1	NM_008667.3	mouse	genbank	58_37k	-1	validated	intronic	c.816+45	e1+45	-	-	-	-	no_errors	Unknown	Unknown	Unknown	19	0	0	9	5	35.71	Somatic	0.991164	4.72029	0	1	100
1	52694169	52694169	G	T	SNP	Tmem194b	ENSMUST00000087708	mouse	ensembl	58_37k	1	known	intronic	c.95-40	e2-40	-	-	-	-	no_errors	Unknown	Unknown	Unknown	38	0	0	20	11	35.48	Somatic	0.99994	9.72678	0	0	0
1	53251796	53251796	C	A	SNP	Pms1	NM_153556.1	mouse	genbank	58_37k	-1	provisional	missense	c.2404	p.G802C	-	NULL	HMMPfam_HMG_box,HMMSmart_HMG,HMMPfam_HATPase_c,HMMSmart_HATPase_c,superfamily_ATP_bd_ATPase,superfamily_HMG-box,HMMPfam_DNA_mis_repair,PatternScan_DNA_MISMATCH_REPAIR_1,superfamily_Ribosomal_S5_D2-typ_fold	-	no_errors	Unknown	Unknown	Unknown	58	0	0	30	30	50	Somatic	1	24.7275	18	18	50
1	53405308	53405308	C	T	SNP	Asnsd1	NM_133728.2	mouse	genbank	58_37k	-1	provisional	missense	c.3	p.M1I	-	NULL	HMMPfam_Asn_synthase,superfamily_Adenine nucleotide alpha hydrolases-like,superfamily_N-terminal nucleophile aminohydrolases (Ntn hydrolases)	-	no_errors	Unknown	Unknown	Unknown	128	0	0	47	61	56.48	Somatic	1	59.6271	119	82	40.8
1	53501301	53501301	C	A	SNP	Dnahc7	XM_001477662.1	mouse	genbank	58_37k	-1	model	missense	c.10046	p.C3349F	-	HMMPfam_Dynein_heavy	PatternScan_ADH_SHORT,HMMSmart_SM00382,HMMPfam_Dynein_heavy,HMMPfam_AAA_5,HMMPfam_DHC_N2,PatternScan_EF_HAND_1,superfamily_P-loop containing nucleoside triphosphate hydrolases	-	no_errors	Unknown	Unknown	Unknown	104	0	0	71	62	46.62	Somatic	1	43.2813	0	0	0
1	54421341	54421341	C	G	SNP	Ccdc150	NM_030025.2	mouse	genbank	58_37k	1	validated	missense	c.2681	p.T894R	-	NULL	NULL	-	no_errors	Unknown	Unknown	Unknown	12	0	0	9	11	55	Somatic	0.998532	6.70835	0	0	0
1	54495654	54495654	C	A	SNP	Gtf3c3	NM_001033194.2	mouse	genbank	58_37k	-1	provisional	splice_region	c.102+3	e1+3	-	-	-	-	no_errors	Unknown	Unknown	Unknown	13	0	0	9	4	30.77	Somatic	0.952844	3.0076	0	7	100
1	55140569	55140569	C	T	SNP	Hspd1	NM_010477.4	mouse	genbank	58_37k	-1	validated	silent	c.510	p.Q170	-	HMMPfam_Cpn60_TCP1,superfamily_GroEL equatorial domain-like,superfamily_GroEL-intermediate domain like	HMMPfam_Cpn60_TCP1,superfamily_GroEL equatorial domain-like,PatternScan_CHAPERONINS_CPN60,superfamily_GroEL apical domain-like,superfamily_GroEL-intermediate domain like	-	no_errors	Unknown	Unknown	Unknown	87	0	0	30	25	45.45	Somatic	1	27.3113	1554	1532	49.56
1	55752939	55752939	T	G	SNP	Plcl1	ENSMUST00000042986	mouse	ensembl	58_37k	1	known	missense	c.351	p.N117K	-	HMMPfam_PH,HMMSmart_SM00233,superfamily_PH domain-like	HMMPfam_C2,HMMSmart_SM00239,HMMPfam_PI-PLC-X,HMMSmart_SM00148,HMMPfam_PI-PLC-Y,HMMSmart_SM00149,HMMPfam_PH,HMMSmart_SM00233,superfamily_C2 domain (Calcium/lipid-binding domain CaLB),HMMPfam_efhand_like,superfamily_PLC-like phosphodiesterases,superfamily_E	-	no_errors	Unknown	Unknown	Unknown	53	0	0	15	12	44.44	Somatic	1	14.7361	25	19	43.18
1	58086735	58086735	G	T	SNP	Aox1	NM_009676.2	mouse	genbank	58_37k	1	validated	5_prime_flanking_region	c.-126	NULL	-	-	-	-	no_errors	Unknown	Unknown	Unknown	36	0	0	20	24	54.55	Somatic	1	18.1909	1	1	50
1	58098358	58098358	T	G	SNP	Aox1	NM_009676.2	mouse	genbank	58_37k	1	validated	intronic	c.100+21	e2+21	-	-	-	-	no_errors	Unknown	Unknown	Unknown	35	0	0	23	11	32.35	Somatic	0.9998	8.516	0	1	100
1	58126960	58126960	G	-	DEL	Aox1	NM_009676.2	mouse	genbank	58_37k	1	validated	frame_shift_del	c.2062	p.V688fs	-	HMMPfam_Ald_Xan_dh_C,superfamily_CO dehydrogenase molybdoprotein N-domain-like	PatternScan_MOLYBDOPTERIN_EUK,HMMPfam_Ald_Xan_dh_C,superfamily_CO dehydrogenase molybdoprotein N-domain-like,HMMPfam_Fer2,superfamily_2Fe-2S ferredoxin-like,HMMPfam_FAD_binding_5,HMMPfam_Fer2_2,superfamily_CO dehydrogenase ISP C-domain like,HMMPfam_CO_deh	-	no_errors	Unknown	Unknown	Unknown	46	0	0	30	12	28.57	Somatic	0.999922	9.46139	33	5	13.16
1	58269799	58269799	C	A	SNP	Aox4	NM_023631.2	mouse	genbank	58_37k	1	validated	intronic	c.55-67	e2-67	-	-	-	-	no_errors	Unknown	Unknown	Unknown	87	0	0	46	40	46.51	Somatic	1	33.2723	0	0	0
1	58389602	58389602	C	A	SNP	Aox3l1	NM_001008419.2	mouse	genbank	58_37k	1	validated	intronic	c.2498+82	e22+82	-	-	-	-	no_errors	Unknown	Unknown	Unknown	12	0	0	5	7	58.33	Somatic	0.997776	6.21637	0	0	0
1	58400693	58400693	G	T	SNP	Aox3l1	NM_001008419.2	mouse	genbank	58_37k	1	validated	intronic	c.3189+98	e27+98	-	-	-	-	no_errors	Unknown	Unknown	Unknown	30	0	0	16	16	50	Somatic	0.999998	12.9212	0	0	0
1	59107711	59107711	C	A	SNP	Als2cr11	NM_175200.4	mouse	genbank	58_37k	-1	validated	3_prime_untranslated_region	c.*56	NULL	-	-	-	-	no_errors	Unknown	Unknown	Unknown	77	0	0	36	36	50	Somatic	1	31.706	0	0	0
1	59541516	59541516	G	T	SNP	Fzd7	NM_008057.3	mouse	genbank	58_37k	1	validated	silent	c.1713	p.A571	-	NULL	superfamily_Frizzled cysteine-rich domain,HMMPfam_Frizzled,HMMPfam_Fz,HMMSmart_SM00063	-	no_errors	Unknown	Unknown	Unknown	64	0	0	34	33	49.25	Somatic	1	26.8627	51	41	44.57
1	59872335	59872335	G	C	SNP	Bmpr2	NM_007561.3	mouse	genbank	58_37k	1	provisional	intronic	c.418+80	e3+80	-	-	-	-	no_errors	Unknown	Unknown	Unknown	14	0	0	10	7	41.18	Somatic	0.992562	4.90083	1	0	0
1	60362195	60362195	G	T	SNP	Nbeal1	ENSMUST00000035550	mouse	ensembl	58_37k	1	known	missense	c.596	p.S199I	-	superfamily_WD40_like	HMMPfam_Beach,superfamily_Beige_BEACH,HMMSmart_WD40,superfamily_WD40_like,HMMPfam_WD40	-	no_errors	Unknown	Unknown	Unknown	65	0	0	28	14	33.33	Somatic	0.999999	14.1273	17	26	59.09
1	60362314	60362314	G	T	SNP	Nbeal1	ENSMUST00000035550	mouse	ensembl	58_37k	1	known	intronic	c.609+106	e6+106	-	-	-	-	no_errors	Unknown	Unknown	Unknown	14	0	0	6	5	45.45	Somatic	0.991692	4.79025	0	0	0
1	60386170	60386170	G	T	SNP	Nbeal1	ENSMUST00000035550	mouse	ensembl	58_37k	1	known	splice_site	c.1416-1	e13-1	-	-	-	-	no_errors	Unknown	Unknown	Unknown	130	0	0	74	63	45.99	Somatic	1	50.0558	0	0	0
1	60420196	60420196	G	-	DEL	Cyp20a1	NM_030013.2	mouse	genbank	58_37k	1	provisional	frame_shift_del	c.595	p.G199fs	-	superfamily_Cytochrome_P450	HMMPfam_p450,superfamily_Cytochrome_P450	-	no_errors	Unknown	Unknown	Unknown	64	0	0	30	27	47.37	Somatic	1	24.1597	208	15	6.73
1	63722356	63722356	G	A	SNP	Dytn	NM_001081658.1	mouse	genbank	58_37k	-1	provisional	missense	c.338	p.A113V	-	HMMPfam_efhand_1,superfamily_EF-hand	HMMPfam_ZZ,HMMSmart_SM00291,PatternScan_ZF_ZZ_1,HMMPfam_efhand_1,HMMPfam_efhand_2,superfamily_EF-hand	-	no_errors	Unknown	Unknown	Unknown	50	0	0	17	16	48.48	Somatic	1	17.3267	0	0	0
1	63784268	63784268	G	T	SNP	Fastkd2	ENSMUST00000148758	mouse	ensembl	58_37k	1	known	3_prime_untranslated_region	c.*63784268	NULL	-	-	-	-	no_coding_region	Unknown	Unknown	Unknown	53	0	0	14	12	46.15	Somatic	1	15.1756	0	1	100
1	64984802	64984802	C	G	SNP	Plekhm3	NM_001039493.1	mouse	genbank	58_37k	-1	validated	missense	c.82	p.E28Q	-	NULL	HMMPfam_PH,HMMSmart_SM00233,superfamily_PH domain-like	-	no_errors	Unknown	Unknown	Unknown	78	0	0	39	34	46.58	Somatic	1	29.3263	15	11	42.31
1	65104061	65104061	C	A	SNP	4921521F21Rik	NM_027582.3	mouse	genbank	58_37k	-1	predicted	5_prime_flanking_region	c.-31769	NULL	-	-	-	-	no_errors	Unknown	Unknown	Unknown	7	0	0	3	6	66.67	Somatic	0.986794	4.78603	0	0	0
1	65108825	65108825	C	A	SNP	Crygd	NM_007776.2	mouse	genbank	58_37k	-1	validated	intronic	c.253-69	e3-69	-	-	-	-	no_errors	Unknown	Unknown	Unknown	31	0	0	14	12	46.15	Somatic	0.999985	11.0788	0	0	0
1	65298256	65298256	A	G	SNP	Pikfyve	NM_011086.2	mouse	genbank	58_37k	1	validated	splice_region	c.3653+6	e21+6	-	-	-	-	no_errors	Unknown	Unknown	Unknown	111	0	0	47	22	31.88	Somatic	1	22.5302	0	0	0
1	66516021	66516021	C	A	SNP	Unc80	ENSMUST00000114009	mouse	ensembl	58_37k	1	known	intronic	c.93-17	e2-17	-	-	-	-	no_errors	Unknown	Unknown	Unknown	84	0	0	29	26	47.27	Somatic	1	28.1011	0	0	0
1	66904179	66904179	C	A	SNP	Acadl	NM_007381.3	mouse	genbank	58_37k	-1	provisional	intronic	c.78-51	e2-51	-	-	-	-	no_errors	Unknown	Unknown	Unknown	41	0	0	9	10	52.63	Somatic	0.999999	13.4781	1	0	0
1	67186409	67186409	G	T	SNP	Cps1	NM_001080809.1	mouse	genbank	58_37k	1	provisional	missense	c.205	p.G69C	-	HMMPfam_CPSase_sm_chain,superfamily_Carbamoyl phosphate synthetase small subunit N-terminal domain	HMMPfam_GATase,HMMPfam_CPSase_sm_chain,superfamily_Carbamoyl phosphate synthetase small subunit N-terminal domain,HMMPfam_CPSase_L_D2,PatternScan_CPSASE_1,PatternScan_CPSASE_2,HMMPfam_CPSase_L_D3,superfamily_Carbamoyl phosphate synthetase large subunit co	-	no_errors	Unknown	Unknown	Unknown	65	0	0	24	26	52	Somatic	1	26.1974	0	0	0
1	67274862	67274862	C	A	SNP	Cps1	NM_001080809.1	mouse	genbank	58_37k	1	provisional	missense	c.4214	p.A1405D	-	HMMPfam_MGS,superfamily_Methylglyoxal synthase-like	HMMPfam_GATase,HMMPfam_CPSase_sm_chain,superfamily_Carbamoyl phosphate synthetase small subunit N-terminal domain,HMMPfam_CPSase_L_D2,PatternScan_CPSASE_1,PatternScan_CPSASE_2,HMMPfam_CPSase_L_D3,superfamily_Carbamoyl phosphate synthetase large subunit co	-	no_errors	Unknown	Unknown	Unknown	65	0	0	40	7	14.58	Somatic	0.996828	5.75101	0	0	0
1	71349274	71349274	G	T	SNP	Abca12	ENSMUST00000087268	mouse	ensembl	58_37k	-1	known	missense	c.3113	p.T1038K	-	NULL	HMMPfam_ABC_tran,HMMSmart_SM00382,PatternScan_ABC_TRANSPORTER_1,superfamily_P-loop containing nucleoside triphosphate hydrolases	-	no_stop_codon	Unknown	Unknown	Unknown	122	0	0	62	62	50	Somatic	1	51.7047	0	0	0
1	74000439	74000439	C	T	SNP	Tns1	ENSMUST00000068832	mouse	ensembl	58_37k	-1	known	5_prime_flanking_region	c.-11836	NULL	-	-	-	-	no_errors	Unknown	Unknown	Unknown	84	0	0	26	31	54.39	Somatic	1	34.1347	30	36	54.55
1	74474875	74474875	C	A	SNP	Vil1	NM_009509.2	mouse	genbank	58_37k	1	validated	intronic	c.2160+46	e16+46	-	-	-	-	no_errors	Unknown	Unknown	Unknown	17	0	0	17	14	45.16	Somatic	0.999418	7.46156	0	0	0
1	74655804	74655804	G	T	SNP	Stk36	NM_175031.3	mouse	genbank	58_37k	1	validated	missense	c.653	p.R218L	-	HMMSmart_SM00219,HMMSmart_SM00220,superfamily_Protein kinase-like (PK-like),HMMPfam_Pkinase	HMMPfam_HEAT,HMMSmart_SM00219,HMMSmart_SM00220,PatternScan_PROTEIN_KINASE_ST,superfamily_Protein kinase-like (PK-like),superfamily_ARM repeat,PatternScan_PROTEIN_KINASE_ATP,HMMPfam_Pkinase	-	no_errors	Unknown	Unknown	Unknown	49	0	0	29	22	42.31	Somatic	1	17.3297	4	4	50
1	74784189	74784189	G	A	SNP	Cyp27a1	NM_024264.4	mouse	genbank	58_37k	1	provisional	missense	c.1558	p.V520I	-	HMMPfam_p450,superfamily_Cytochrome_P450	HMMPfam_p450,superfamily_Cytochrome_P450,PatternScan_CYTOCHROME_P450	-	no_errors	Unknown	Unknown	Unknown	28	0	0	14	12	46.15	Somatic	0.999969	10.3779	0	0	0
1	74849926	74849926	G	T	SNP	Wnt10a	NM_009518.2	mouse	genbank	58_37k	1	validated	missense	c.986	p.R329L	-	HMMPfam_wnt,HMMSmart_WNT1	HMMPfam_wnt,HMMSmart_WNT1,PatternScan_WNT1	-	no_errors	Unknown	Unknown	Unknown	33	0	0	16	33	67.35	Somatic	1	23.9823	0	0	0
1	74992974	74992974	C	A	SNP	Ihh	NM_010544.2	mouse	genbank	58_37k	-1	provisional	missense	c.1039	p.V347L	-	HMMPfam_Hint,HMMSmart_HintC,superfamily_SSF51294	HMMPfam_HH_signal,HMMPfam_Hint,PatternScan_PUR_PYR_PR_TRANSFER,HMMSmart_HintC,HMMSmart_HintN,superfamily_Hedgehog_sig_N,superfamily_SSF51294	-	no_errors	Unknown	Unknown	Unknown	54	0	0	29	30	50.85	Somatic	1	23.9652	0	0	0
1	75092962	75092962	C	A	SNP	Nhej1	ENSMUST00000152855	mouse	ensembl	58_37k	-1	known	intronic	c.139+113	e1+113	-	-	-	-	no_errors	Unknown	Unknown	Unknown	28	0	0	15	14	48.28	Somatic	0.999989	11.4101	0	2	100
1	75129120	75129120	C	A	SNP	Slc23a3	NM_194333.3	mouse	genbank	58_37k	-1	validated	intronic	c.686+53	e5+53	-	-	-	-	no_errors	Unknown	Unknown	Unknown	11	0	0	9	5	35.71	Somatic	0.963274	3.27492	0	0	0
1	75186985	75186985	C	A	SNP	Atg9a	NM_001003917.	mouse	genbank	58_37k	-1	provisional	5_prime_untranslated_region	c.-6	NULL	-	-	-	-	no_errors	Unknown	Unknown	Unknown	58	0	0	32	34	51.52	Somatic	1	26.5355	66	63	48.84
1	75198956	75198956	T	C	SNP	Glb1l	ENSMUST00000027399	mouse	ensembl	58_37k	-1	known	intronic	c.768+27	e7+27	-	-	-	-	no_errors	Unknown	Unknown	Unknown	67	0	0	42	40	48.78	Somatic	1	29.1889	2	1	33.33
1	75251861	75251861	T	A	SNP	Ptprn	NM_008985.2	mouse	genbank	58_37k	-1	validated	intronic	c.1443-75	e10-75	-	-	-	-	no_errors	Unknown	Unknown	Unknown	39	0	0	20	24	54.55	Somatic	1	19.2074	1	4	80
1	75272345	75272345	A	C	SNP	Resp18	NM_009049.1	mouse	genbank	58_37k	-1	provisional	intronic	c.107-53	e2-53	-	-	-	-	no_errors	Unknown	Unknown	Unknown	35	0	0	8	11	57.89	Somatic	0.999999	14.013	0	0	0
1	75309991	75309991	C	T	SNP	Dnpep	NM_016878.4	mouse	genbank	58_37k	-1	validated	splice_region	c.900+10	e9+10	-	-	-	-	no_errors	Unknown	Unknown	Unknown	69	0	0	22	54	71.05	Somatic	1	49.3119	2	0	0
1	75415552	75415552	G	A	SNP	Speg	NM_007463.4	mouse	genbank	58_37k	1	validated	silent	c.5391	p.T1797	-	HMMSmart_SM00220,superfamily_Protein kinase-like (PK-like),HMMPfam_Pkinase	HMMSmart_SM00219,HMMSmart_SM00220,HMMSmart_SM00408,HMMSmart_SM00409,HMMPfam_fn3,HMMSmart_SM00060,PatternScan_PROTEIN_KINASE_ST,superfamily_Fibronectin type III,superfamily_Protein kinase-like (PK-like),HMMPfam_I-set,PatternScan_PROTEIN_KINASE_ATP,HMMPfam_	-	no_errors	Unknown	Unknown	Unknown	100	0	0	64	56	46.67	Somatic	1	40.8844	0	0	0
1	75427866	75427866	A	T	SNP	Speg	NM_007463.4	mouse	genbank	58_37k	1	validated	missense	c.9629	p.H3210L	-	HMMSmart_SM00219,HMMSmart_SM00220,superfamily_Protein kinase-like (PK-like),HMMPfam_Pkinase	HMMSmart_SM00219,HMMSmart_SM00220,HMMSmart_SM00408,HMMSmart_SM00409,HMMPfam_fn3,HMMSmart_SM00060,PatternScan_PROTEIN_KINASE_ST,superfamily_Fibronectin type III,superfamily_Protein kinase-like (PK-like),HMMPfam_I-set,PatternScan_PROTEIN_KINASE_ATP,HMMPfam_	-	no_errors	Unknown	Unknown	Unknown	169	0	0	95	51	34.69	Somatic	1	43.323	0	0	0
1	75433569	75433569	G	A	SNP	Gmppa	NM_133708.3	mouse	genbank	58_37k	1	validated	missense	c.98	p.G33D	-	HMMPfam_NTP_transferase,superfamily_SSF53448	HMMPfam_Hexapep,HMMPfam_NTP_transferase,superfamily_Trimer_LpxA_like,PatternScan_HEXAPEP_TRANSFERASES,superfamily_SSF53448	-	no_errors	Unknown	Unknown	Unknown	55	0	0	33	36	52.17	Somatic	1	26.3879	71	52	41.6
1	75433570	75433570	C	T	SNP	Gmppa	NM_133708.3	mouse	genbank	58_37k	1	validated	silent	c.99	p.G33	-	HMMPfam_NTP_transferase,superfamily_SSF53448	HMMPfam_Hexapep,HMMPfam_NTP_transferase,superfamily_Trimer_LpxA_like,PatternScan_HEXAPEP_TRANSFERASES,superfamily_SSF53448	-	no_errors	Unknown	Unknown	Unknown	56	1	1.75	34	36	51.43	Somatic	1	22.9652	71	53	42.4
1	75479455	75479455	T	A	SNP	Tmem198	NM_177056.4	mouse	genbank	58_37k	1	validated	missense	c.478	p.C160S	-	NULL	NULL	-	no_errors	Unknown	Unknown	Unknown	50	0	0	20	22	52.38	Somatic	1	21.0399	0	0	0
1	75503954	75503955	-	T	INS	Inha	NM_010564.4	mouse	genbank	58_37k	1	provisional	frame_shift_ins	c.132_133	p.P44fs	-	NULL	HMMPfam_TGF_beta,HMMSmart_TGFB,PatternScan_TGF_BETA_1,superfamily_SSF57501	-	no_errors	Unknown	Unknown	Unknown	22	0	0	12	10	45.45	Somatic	0.999726	8.20292	0	2	100
1	75531787	75531787	G	T	SNP	Stk11ip	NM_027886.3	mouse	genbank	58_37k	1	validated	silent	c.2856	p.T952	-	NULL	superfamily_SSF52075	-	no_errors	Unknown	Unknown	Unknown	203	0	0	113	81	41.75	Somatic	1	66.9983	25	19	43.18
1	75551802	75551802	C	T	SNP	Slc4a3	NM_009208.3	mouse	genbank	58_37k	1	validated	intronic	c.2751+86	e16+86	-	-	-	-	no_errors	Unknown	Unknown	Unknown	28	0	0	11	13	54.17	Somatic	0.999996	12.4079	0	0	0
1	78663509	78663510	-	G	INS	Utp14b	NM_001001981.	mouse	genbank	58_37k	1	validated	3_prime_untranslated_region	c.*205	NULL	-	-	-	-	no_errors	Unknown	Unknown	Unknown	43	0	0	28	12	30	Somatic	0.99992	9.42788	6	1	14.29
1	79610671	79610671	G	T	SNP	Ap1s3	NM_183027.2	mouse	genbank	58_37k	-1	validated	intronic	c.429+107	e4+107	-	-	-	-	no_errors	Unknown	Unknown	Unknown	13	0	0	4	4	50	Somatic	0.989398	4.54934	0	0	0
1	80537802	80537802	C	A	SNP	Dock10	ENSMUST00000097681	mouse	ensembl	58_37k	-1	known	splice_site	c.3814+1	e34+1	-	-	-	-	no_errors	Unknown	Unknown	Unknown	47	0	0	13	18	58.06	Somatic	1	20.581	0	0	0
1	82458594	82458594	C	A	SNP	Col4a4	NM_007735.2	mouse	genbank	58_37k	-1	validated	intronic	c.4192+32	e43+32	-	-	-	-	no_errors	Unknown	Unknown	Unknown	89	0	0	44	39	46.99	Somatic	1	33.7987	0	0	0
1	82463145	82463145	T	A	SNP	Col4a4	NM_007735.2	mouse	genbank	58_37k	-1	validated	silent	c.3975	p.P1325	-	HMMPfam_Collagen	HMMPfam_C4,HMMSmart_SM00111,HMMPfam_Collagen,superfamily_C-type lectin-like	-	no_errors	Unknown	Unknown	Unknown	20	0	0	21	13	38.24	Somatic	0.999076	6.98639	0	0	0
1	82676320	82676320	A	C	SNP	Col4a3	NM_007734.2	mouse	genbank	58_37k	1	validated	intronic	c.2482+83	e31+83	-	-	-	-	no_errors	Unknown	Unknown	Unknown	10	0	0	7	8	53.33	Somatic	0.993522	5.20738	0	0	0
1	82677444	82677444	T	C	SNP	Col4a3	NM_007734.2	mouse	genbank	58_37k	1	validated	intronic	c.2650+22	e32+22	-	-	-	-	no_errors	Unknown	Unknown	Unknown	10	0	0	5	4	44.44	Somatic	0.969587	3.49525	0	0	0
1	82692821	82692821	G	A	SNP	Col4a3	NM_007734.2	mouse	genbank	58_37k	1	validated	splice_region	c.3332-10	e39-10	-	-	-	-	no_errors	Unknown	Unknown	Unknown	43	0	0	12	19	61.29	Somatic	1	21.0306	0	0	0
1	83272718	83272718	C	A	SNP	Sphkap	NM_172430.3	mouse	genbank	58_37k	-1	validated	missense	c.3884	p.W1295L	-	NULL	HMMPfam_AKAP_110	-	no_errors	Unknown	Unknown	Unknown	56	0	0	20	25	55.56	Somatic	1	25.0435	0	0	0
1	83285320	83285320	A	G	SNP	Sphkap	NM_172430.3	mouse	genbank	58_37k	-1	validated	intronic	c.435+17	e5+17	-	-	-	-	no_errors	Unknown	Unknown	Unknown	49	0	0	26	11	29.73	Somatic	0.999949	9.87634	0	0	0
1	85271596	85271596	C	A	SNP	C130026I21Rik	NM_175219.3	mouse	genbank	58_37k	-1	validated	5_prime_flanking_region	c.-4957	NULL	-	-	-	-	no_errors	Unknown	Unknown	Unknown	72	0	0	52	11	17.46	Somatic	0.999731	8.22074	0	0	0
1	87593600	87593600	A	C	SNP	Sp100	NM_013673.3	mouse	genbank	58_37k	1	provisional	missense	c.1134	p.E378D	-	HMMPfam_SAND,superfamily_SAND_like	HMMPfam_SAND,HMMSmart_SAND,HMMPfam_Bromodomain,HMMSmart_BROMO,superfamily_Bromodomain,HMMPfam_Sp100,superfamily_SAND_like	-	no_errors	Unknown	Unknown	Unknown	69	0	0	84	7	7.69	Somatic	0.966792	3.37773	101	12	10.53
1	87918825	87918825	C	A	SNP	Spata3	NM_027300.3	mouse	genbank	58_37k	1	validated	missense	c.202	p.Q68K	-	NULL	NULL	-	no_errors	Unknown	Unknown	Unknown	43	0	0	20	21	51.22	Somatic	1	18.3971	0	0	0
1	87922905	87922905	G	T	SNP	Spata3	NM_027300.3	mouse	genbank	58_37k	1	validated	intronic	c.477-84	e3-84	-	-	-	-	no_errors	Unknown	Unknown	Unknown	128	0	0	39	51	56.67	Somatic	1	55.7245	0	0	0
1	88066524	88066524	T	G	SNP	Armc9	NM_030184.2	mouse	genbank	58_37k	1	validated	missense	c.547	p.F183V	-	superfamily_ARM repeat	HMMSmart_SM00667,superfamily_ARM repeat	-	no_errors	Unknown	Unknown	Unknown	82	0	0	77	19	19.79	Somatic	0.999993	11.8732	66	3	4.35
1	88090783	88090783	G	T	SNP	Armc9	NM_030184.2	mouse	genbank	58_37k	1	validated	intronic	c.1123-69	e12-69	-	-	-	-	no_errors	Unknown	Unknown	Unknown	115	0	0	60	61	50.41	Somatic	1	49.841	0	0	0
1	88170938	88170938	T	G	SNP	Armc9	NM_030184.2	mouse	genbank	58_37k	1	validated	intronic	c.2259-20	e23-20	-	-	-	-	no_errors	Unknown	Unknown	Unknown	47	0	0	41	13	24.07	Somatic	0.999797	8.50048	0	0	0
1	88249757	88249757	T	C	SNP	Ncl	NM_010880.3	mouse	genbank	58_37k	-1	validated	missense	c.1394	p.Y465C	-	superfamily_SSF54928	HMMPfam_RRM_1,HMMSmart_RRM,superfamily_SSF54928	-	no_errors	Unknown	Unknown	Unknown	194	0	0	177	12	6.35	Somatic	0.998797	6.72499	1819	110	5.7
1	88249789	88249789	T	A	SNP	Ncl	NM_010880.3	mouse	genbank	58_37k	-1	validated	silent	c.1362	p.A454	-	HMMPfam_RRM_1,HMMSmart_RRM,superfamily_SSF54928	HMMPfam_RRM_1,HMMSmart_RRM,superfamily_SSF54928	-	no_errors	Unknown	Unknown	Unknown	156	0	0	77	74	49.01	Somatic	1	63.3462	1172	1127	48.94
1	88996754	88996754	G	T	SNP	Alpi	NM_001081082.1	mouse	genbank	58_37k	-1	provisional	missense	c.678	p.F226L	-	HMMPfam_Alk_phosphatase,HMMSmart_SM00098,superfamily_Alkaline phosphatase-like	HMMPfam_Alk_phosphatase,HMMSmart_SM00098,superfamily_Alkaline phosphatase-like,PatternScan_ALKALINE_PHOSPHATASE	-	no_errors	Unknown	Unknown	Unknown	43	0	0	24	30	55.56	Somatic	1	22.4685	0	0	0
1	89023846	89023846	G	T	SNP	Akp3	NM_007432.2	mouse	genbank	58_37k	1	validated	intronic	c.1184-59	e10-59	-	-	-	-	no_errors	Unknown	Unknown	Unknown	36	0	0	24	19	44.19	Somatic	0.999999	13.7056	0	0	0
1	89283655	89283655	G	T	SNP	Gigyf2	NM_146112.4	mouse	genbank	58_37k	1	validated	intronic	c.535+7072	e6+7072	-	-	-	-	no_errors	Unknown	Unknown	Unknown	39	0	0	13	20	60.61	Somatic	1	20.0229	0	0	0
1	89377670	89377670	G	A	SNP	Ngef	NM_019867.2	mouse	genbank	58_37k	-1	validated	intronic	c.1133+21	e8+21	-	-	-	-	no_errors	Unknown	Unknown	Unknown	9	0	0	11	8	42.11	Somatic	0.974945	3.72914	1	0	0
1	89614321	89614321	A	G	SNP	Inpp5d	NM_010566.2	mouse	genbank	58_37k	1	validated	missense	c.3035	p.K1012R	-	NULL	HMMSmart_SM00128,HMMPfam_SH2,HMMSmart_SM00252,HMMPfam_Exo_endo_phos,superfamily_DNase I-like,superfamily_SH2 domain	-	no_errors	Unknown	Unknown	Unknown	56	0	0	39	30	43.48	Somatic	1	21.0836	0	0	0
1	89714248	89714248	C	A	SNP	Sag	ENSMUST00000156381	mouse	ensembl	58_37k	1	known	3_prime_untranslated_region	c.*89714248	NULL	-	-	-	-	no_coding_region	Unknown	Unknown	Unknown	28	0	0	12	22	64.71	Somatic	1	17.9684	0	0	0
1	90114741	90114741	G	A	SNP	Ugt1a6a	ENSMUST00000073049	mouse	ensembl	58_37k	1	known	silent	c.1350	p.K450	-	HMMPfam_UDPGT,superfamily_SSF53756	HMMPfam_UDPGT,PatternScan_UDPGT,superfamily_SSF53756	-	no_errors	Unknown	Unknown	Unknown	382	1	0.26	354	32	8.29	Somatic	1	17.4219	159	0	0
1	90124656	90124656	C	A	SNP	ENSMUSG00000079429	ENSMUST00000113130	mouse	ensembl	58_37k	1	known	missense	c.14	p.T5N	-	NULL	superfamily_ARM repeat	-	no_errors	Unknown	Unknown	Unknown	284	1	0.35	194	25	11.42	Somatic	1	17.1642	0	0	0
1	90131651	90131651	A	T	SNP	ENSMUSG00000079429	ENSMUST00000113130	mouse	ensembl	58_37k	1	known	intronic	c.1044+14	e8+14	-	-	-	-	no_errors	Unknown	Unknown	Unknown	399	0	0	281	31	9.94	Somatic	1	22.4316	0	0	0
1	90131821	90131821	C	G	SNP	ENSMUSG00000079429	ENSMUST00000113130	mouse	ensembl	58_37k	1	known	missense	c.1101	p.I367M	-	superfamily_ARM repeat	superfamily_ARM repeat	-	no_errors	Unknown	Unknown	Unknown	328	0	0	278	28	9.15	Somatic	1	17.7949	0	0	0
1	90134347	90134347	G	T	SNP	ENSMUSG00000079429	ENSMUST00000113130	mouse	ensembl	58_37k	1	known	intronic	c.1435-73	e13-73	-	-	-	-	no_errors	Unknown	Unknown	Unknown	76	0	0	74	11	12.94	Somatic	0.998672	6.62244	0	0	0
1	90147807	90147807	G	T	SNP	ENSMUSG00000079429	ENSMUST00000113130	mouse	ensembl	58_37k	1	known	intronic	c.3190-13	e29-13	-	-	-	-	no_errors	Unknown	Unknown	Unknown	238	0	0	207	12	5.48	Somatic	0.998637	6.61136	0	0	0
1	90147937	90147937	T	G	SNP	ENSMUSG00000079429	ENSMUST00000113130	mouse	ensembl	58_37k	1	known	missense	c.3307	p.F1103V	-	superfamily_ARM repeat	superfamily_ARM repeat	-	no_errors	Unknown	Unknown	Unknown	162	0	0	159	15	8.62	Somatic	0.99981	8.56874	0	0	0
1	90165977	90165977	G	-	DEL	Hjurp	NM_198652.2	mouse	genbank	58_37k	-1	validated	frame_shift_del	c.366	p.G123fs	-	NULL	NULL	-	no_errors	Unknown	Unknown	Unknown	406	0	0	327	49	13.03	Somatic	1	33.5736	462	14	2.94
1	90281145	90281145	G	T	SNP	Trpm8	NM_134252.3	mouse	genbank	58_37k	1	validated	intronic	c.3265-93	e24-93	-	-	-	-	no_errors	Unknown	Unknown	Unknown	20	0	0	10	10	50	Somatic	0.999781	8.42946	0	0	0
1	91889728	91889728	G	T	SNP	Asb18	NM_139152.1	mouse	genbank	58_37k	-1	provisional	missense	c.401	p.S134Y	-	HMMPfam_Ank,HMMSmart_SM00248,superfamily_Ankyrin repeat	HMMPfam_SOCS_box,HMMSmart_SM00253,HMMPfam_Ank,HMMSmart_SM00248,superfamily_Ankyrin repeat	-	no_errors	Unknown	Unknown	Unknown	72	0	0	23	30	55.56	Somatic	1	31.8882	0	0	0
1	92965095	92965095	A	T	SNP	Lrrfip1	NM_008515.4	mouse	genbank	58_37k	1	validated	intronic	c.67-45	e2-45	-	-	-	-	no_errors	Unknown	Unknown	Unknown	63	0	0	36	25	40.98	Somatic	1	20.4083	0	0	0
1	92975024	92975024	G	T	SNP	Lrrfip1	NM_008515.4	mouse	genbank	58_37k	1	validated	intronic	c.264+12	e5+12	-	-	-	-	no_errors	Unknown	Unknown	Unknown	84	0	0	52	41	44.09	Somatic	1	31.1461	0	4	100
1	93103136	93103137	-	CTGGCTT	INS	Ramp1	ENSMUST00000048383	mouse	ensembl	58_37k	1	known	frame_shift_ins	c.620_621	p.S210fs	-	NULL	NULL	-	no_errors	Unknown	Unknown	Unknown	NA	NA	NA	NA	NA	NA	Somatic	NA	NA	NA	NA	NA
1	93103482	93103482	C	A	SNP	Ramp1	NM_016894.3	mouse	genbank	58_37k	1	validated	intronic	c.191+9996	e2+9996	-	-	-	-	no_errors	Unknown	Unknown	Unknown	39	0	0	14	15	51.72	Somatic	1	15.4043	0	0	0
1	93250536	93250536	G	T	SNP	Klhl30	NM_027551.2	mouse	genbank	58_37k	1	provisional	missense	c.281	p.G94V	-	HMMSmart_BTB,superfamily_BTB/POZ_fold,HMMPfam_BTB	HMMSmart_BTB,HMMPfam_Kelch_1,HMMSmart_Kelch,superfamily_Gal_oxid_central,superfamily_BTB/POZ_fold,HMMPfam_BACK,HMMPfam_BTB	-	no_errors	Unknown	Unknown	Unknown	32	0	0	11	18	62.07	Somatic	1	17.4354	0	0	0
1	93268079	93268079	G	T	SNP	Fam132b	NM_173395.2	mouse	genbank	58_37k	1	validated	intronic	c.924+42	e7+42	-	-	-	-	no_errors	Unknown	Unknown	Unknown	26	0	0	12	15	55.56	Somatic	0.999997	12.7672	0	3	100
1	93279882	93279882	C	A	SNP	Ilkap	NM_023343.2	mouse	genbank	58_37k	-1	provisional	missense	c.713	p.R238L	-	HMMSmart_SM00332,superfamily_Protein serine/threonine phosphatase 2C catalytic domain,HMMPfam_PP2C	PatternScan_PP2C,HMMSmart_SM00332,superfamily_Protein serine/threonine phosphatase 2C catalytic domain,HMMPfam_PP2C	-	no_errors	Unknown	Unknown	Unknown	23	0	0	9	8	47.06	Somatic	0.999675	8.03087	341	171	33.33
1	93279884	93279884	A	C	SNP	Ilkap	NM_023343.2	mouse	genbank	58_37k	-1	provisional	missense	c.711	p.S237R	-	HMMSmart_SM00332,superfamily_Protein serine/threonine phosphatase 2C catalytic domain,HMMPfam_PP2C	PatternScan_PP2C,HMMSmart_SM00332,superfamily_Protein serine/threonine phosphatase 2C catalytic domain,HMMPfam_PP2C	-	no_errors	Unknown	Unknown	Unknown	23	0	0	9	8	47.06	Somatic	0.999675	8.03087	332	174	34.25
1	93317929	93317929	C	A	SNP	Per2	NM_011066.3	mouse	genbank	58_37k	-1	validated	intronic	c.3280+16	e19+16	-	-	-	-	no_errors	Unknown	Unknown	Unknown	53	0	0	36	25	40.98	Somatic	1	18.1487	0	0	0
1	93852045	93852045	C	A	SNP	Hdac4	NM_207225.1	mouse	genbank	58_37k	-1	provisional	intronic	c.2614-81	e21-81	-	-	-	-	no_errors	Unknown	Unknown	Unknown	55	0	0	29	24	45.28	Somatic	1	20.1549	0	4	100
1	94470450	94470450	G	T	SNP	Olfr1413	NM_147037.2	mouse	genbank	58_37k	1	validated	missense	c.701	p.R234M	-	HMMPfam_7tm_1,superfamily_SSF81321	HMMPfam_7tm_1,PatternScan_G_PROTEIN_RECEP_F1_1,superfamily_SSF81321	-	no_errors	Unknown	Unknown	Unknown	128	0	0	68	62	47.69	Somatic	1	51.0137	0	0	0
1	94493670	94493670	G	A	SNP	Olfr1411	NM_146490.1	mouse	genbank	58_37k	1	validated	silent	c.573	p.L191	-	HMMPfam_7tm_1,superfamily_SSF81321	HMMPfam_7tm_1,PatternScan_G_PROTEIN_RECEP_F1_1,superfamily_SSF81321	-	no_errors	Unknown	Unknown	Unknown	270	2	0.73	128	147	53.26	Somatic	1	118.455	0	0	0
1	94504805	94504805	C	A	SNP	Olfr1410	NM_146491.1	mouse	genbank	58_37k	1	validated	missense	c.390	p.F130L	-	HMMPfam_7tm_1,PatternScan_G_PROTEIN_RECEP_F1_1,superfamily_SSF81321	HMMPfam_7tm_1,PatternScan_G_PROTEIN_RECEP_F1_1,superfamily_SSF81321	-	no_errors	Unknown	Unknown	Unknown	322	0	0	160	184	53.49	Somatic	1	151.701	0	0	0
1	94869902	94869902	G	A	SNP	Gpr35	ENSMUST00000027489	mouse	ensembl	58_37k	1	known	intronic	c.159+44	e1+44	-	-	-	-	no_errors	Unknown	Unknown	Unknown	16	0	0	3	7	70	Somatic	0.999852	8.87535	0	0	0
1	94938745	94938745	G	T	SNP	Kif1a	NM_008440.3	mouse	genbank	58_37k	-1	validated	missense	c.3076	p.H1026N	-	NULL	HMMPfam_FHA,HMMSmart_SM00240,HMMPfam_Kinesin,HMMSmart_SM00129,HMMPfam_PH,HMMSmart_SM00233,superfamily_SMAD/FHA domain,PatternScan_KINESIN_MOTOR_DOMAIN1,superfamily_PH domain-like,superfamily_P-loop containing nucleoside triphosphate hydrolases	-	no_errors	Unknown	Unknown	Unknown	24	0	0	14	18	56.25	Somatic	0.999998	12.9935	2	0	0
1	95034390	95034390	C	A	SNP	Agxt	NM_016702.2	mouse	genbank	58_37k	1	validated	intronic	c.490-87	e4-87	-	-	-	-	no_errors	Unknown	Unknown	Unknown	36	0	0	20	12	37.5	Somatic	0.999961	10.1561	0	0	0
1	95209600	95209600	C	T	SNP	Pask	ENSMUST00000133886	mouse	ensembl	58_37k	-1	known	5_prime_untranslated_region	c.-95209600	NULL	-	-	-	-	no_coding_region	Unknown	Unknown	Unknown	17	0	0	4	5	55.56	Somatic	0.99829	6.37484	1	0	0
1	95216684	95216684	C	A	SNP	Pask	NM_080850.2	mouse	genbank	58_37k	-1	validated	missense	c.3105	p.W1035C	-	NULL	HMMSmart_SM00091,HMMSmart_SM00219,HMMSmart_SM00220,PatternScan_PROTEIN_KINASE_ST,superfamily_Protein kinase-like (PK-like),HMMPfam_PAS,PatternScan_PROTEIN_KINASE_ATP,HMMPfam_Pkinase,superfamily_PYP-like sensor domain (PAS domain)	-	no_errors	Unknown	Unknown	Unknown	101	0	0	54	47	46.53	Somatic	1	38.8021	44	27	38.03
1	95398273	95398273	G	T	SNP	2018-09-03	NM_010891.2	mouse	genbank	58_37k	1	validated	intronic	c.842+44	e8+44	-	-	-	-	no_errors	Unknown	Unknown	Unknown	21	0	0	12	7	36.84	Somatic	0.997082	5.83391	3	0	0
1	95904892	95904892	G	T	SNP	Gm6086	NM_001039219.2	mouse	genbank	58_37k	1	provisional	intronic	c.372+16	e3+16	-	-	-	-	no_errors	Unknown	Unknown	Unknown	90	0	0	49	47	48.96	Somatic	1	37.7142	0	0	0
1	106830902	106830902	C	A	SNP	Cdh20	NM_011800.4	mouse	genbank	58_37k	1	provisional	missense	c.229	p.P77T	-	HMMPfam_Cadherin,superfamily_Cadherin	HMMPfam_Cadherin_C,HMMPfam_Cadherin,HMMSmart_CA,PatternScan_CADHERIN_1,superfamily_Cadherin	-	no_errors	Unknown	Unknown	Unknown	27	0	0	12	19	61.29	Somatic	1	15.7207	0	0	0
1	107180936	107180936	T	G	SNP	Rnf152	NM_178779.4	mouse	genbank	58_37k	-1	validated	silent	c.472	p.R158	-	NULL	HMMSmart_SM00184,HMMPfam_zf-C3HC4,superfamily_RING/U-box	-	no_errors	Unknown	Unknown	Unknown	59	0	0	32	7	17.95	Somatic	0.998111	6.27027	0	0	0
1	107723765	107723765	G	A	SNP	Tnfrsf11a	NM_009399.3	mouse	genbank	58_37k	1	validated	silent	c.906	p.E302	-	NULL	HMMPfam_TNFR_c6,HMMSmart_SM00208,PatternScan_TNFR_NGFR_1,PatternScan_EGF_2,superfamily_TNF receptor-like	-	no_errors	Unknown	Unknown	Unknown	65	0	0	28	25	47.17	Somatic	1	23.632	6	6	50
1	107724413	107724413	G	T	SNP	Tnfrsf11a	NM_009399.3	mouse	genbank	58_37k	1	validated	intronic	c.1453+101	e8+101	-	-	-	-	no_errors	Unknown	Unknown	Unknown	12	0	0	8	14	63.64	Somatic	0.999675	8.49361	2	0	0
1	108609463	108609463	C	A	SNP	Bcl2	NM_009741.3	mouse	genbank	58_37k	-1	validated	5_prime_untranslated_region	c.-6	NULL	-	-	-	-	no_errors	Unknown	Unknown	Unknown	331	0	0	175	111	38.81	Somatic	1	96.4139	7	10	58.82
1	109421013	109421013	T	G	SNP	Serpinb2	NM_011111.4	mouse	genbank	58_37k	1	validated	intronic	c.844-101	e7-101	-	-	-	-	no_errors	Unknown	Unknown	Unknown	33	0	0	8	8	50	Somatic	0.999969	10.3852	0	0	0
1	112005472	112005472	C	A	SNP	Cdh7	NM_172853.2	mouse	genbank	58_37k	1	provisional	missense	c.1804	p.P602T	-	NULL	HMMPfam_Cadherin_C,HMMPfam_Cadherin,HMMSmart_CA,PatternScan_CADHERIN_1,superfamily_Cadherin	-	no_errors	Unknown	Unknown	Unknown	67	0	0	24	25	51.02	Somatic	1	25.829	0	0	0
1	118325637	118325637	C	A	SNP	Cntnap5a	NM_001077425.1	mouse	genbank	58_37k	1	provisional	intronic	c.2530+109	e16+109	-	-	-	-	no_errors	Unknown	Unknown	Unknown	28	0	0	12	13	52	Somatic	0.999993	11.9359	0	0	0
1	120406782	120406782	G	C	SNP	Clasp1	NM_001081276.1	mouse	genbank	58_37k	1	validated	splice_site	c.1742-1	e18-1	-	-	-	-	no_errors	Unknown	Unknown	Unknown	101	0	0	60	38	38.78	Somatic	1	30.5803	0	0	0
1	120432827	120432827	A	T	SNP	Clasp1	NM_001081276.1	mouse	genbank	58_37k	1	validated	intronic	c.2315-3016	e23-3016	-	-	-	-	no_errors	Unknown	Unknown	Unknown	35	0	0	14	21	60	Somatic	1	18.8533	0	0	0
1	120549526	120549527	-	C	INS	Tcfcp2l1	NM_023755.2	mouse	genbank	58_37k	1	validated	frame_shift_ins	c.372_373	p.G125fs	-	HMMPfam_CP2	HMMPfam_CP2,superfamily_SAM_homology	-	no_errors	Unknown	Unknown	Unknown	102	0	0	49	49	50	Somatic	1	42.4015	1	0	0
1	120733319	120733319	C	A	SNP	Gli2	NM_001081125.1	mouse	genbank	58_37k	-1	provisional	silent	c.3678	p.P1226	-	NULL	HMMPfam_zf-C2H2,PatternScan_ZINC_FINGER_C2H2_1,HMMSmart_SM00355,superfamily_C2H2 and C2HC zinc fingers	-	no_errors	Unknown	Unknown	Unknown	64	0	0	35	20	36.36	Somatic	1	17.1895	0	0	0
1	120744966	120744966	C	A	SNP	Gli2	NM_001081125.1	mouse	genbank	58_37k	-1	provisional	silent	c.1302	p.L434	-	HMMPfam_zf-C2H2,PatternScan_ZINC_FINGER_C2H2_1,HMMSmart_SM00355,superfamily_C2H2 and C2HC zinc fingers	HMMPfam_zf-C2H2,PatternScan_ZINC_FINGER_C2H2_1,HMMSmart_SM00355,superfamily_C2H2 and C2HC zinc fingers	-	no_errors	Unknown	Unknown	Unknown	92	0	0	30	33	52.38	Somatic	1	35.7341	0	0	0
1	121424171	121424171	G	A	SNP	Tmem185b	NM_146103.1	mouse	genbank	58_37k	1	provisional	3_prime_untranslated_region	c.*31	NULL	-	-	-	-	no_errors	Unknown	Unknown	Unknown	62	0	0	39	43	52.44	Somatic	1	30.4307	70	37	34.58
1	121505700	121505700	C	A	SNP	Epb4.1l5	NM_145506.4	mouse	genbank	58_37k	-1	validated	missense	c.1037	p.R346I	-	HMMPfam_FA,superfamily_PH domain-like	HMMPfam_FA,HMMPfam_FERM_N,HMMPfam_FERM_C,PatternScan_FERM_1,PatternScan_FERM_2,HMMPfam_FERM_M,superfamily_Second domain of FERM,HMMSmart_SM00295,superfamily_PH domain-like,superfamily_Ubiquitin-like	-	no_errors	Unknown	Unknown	Unknown	45	0	0	15	19	55.88	Somatic	1	19.7979	11	3	21.43
1	121850667	121850667	T	C	SNP	Gm101	ENSMUST00000037840	mouse	ensembl	58_37k	-1	known	intronic	c.54+58	e1+58	-	-	-	-	no_errors	Unknown	Unknown	Unknown	76	0	0	83	6	6.74	Somatic	0.952819	3.03654	0	0	0
1	121943137	121943137	C	T	SNP	Sctr	ENSMUST00000072886	mouse	ensembl	58_37k	1	known	intronic	c.634-99	e7-99	-	-	-	-	no_errors	Unknown	Unknown	Unknown	25	0	0	8	8	50	Somatic	0.999863	8.89456	0	0	0
1	122390739	122390739	G	T	SNP	Marco	NM_010766.2	mouse	genbank	58_37k	-1	provisional	silent	c.312	p.P104	-	NULL	HMMPfam_SRCR,PatternScan_SRCR_1,HMMPfam_Collagen,HMMSmart_SM00202,superfamily_SRCR-like	-	no_errors	Unknown	Unknown	Unknown	49	0	0	32	18	36	Somatic	0.999999	13.7764	0	0	0
1	123458233	123458233	C	A	SNP	Ddx18	NM_025860.3	mouse	genbank	58_37k	-1	validated	intronic	c.721+34	e5+34	-	-	-	-	no_errors	Unknown	Unknown	Unknown	39	0	0	19	21	52.5	Somatic	1	17.6779	4	0	0
1	125299334	125299334	G	T	SNP	Dpp10	NM_199021.3	mouse	genbank	58_37k	-1	validated	intronic	c.1116+76	e12+76	-	-	-	-	no_errors	Unknown	Unknown	Unknown	58	0	0	21	18	46.15	Somatic	1	19.0337	0	0	0
1	125750660	125750660	C	A	SNP	Dpp10	NM_199021.3	mouse	genbank	58_37k	-1	validated	intronic	c.274+83	e3+83	-	-	-	-	no_errors	Unknown	Unknown	Unknown	63	0	0	18	20	52.63	Somatic	1	23.342	0	0	0
1	125801532	125801532	C	A	SNP	Dpp10	NM_199021.3	mouse	genbank	58_37k	-1	validated	intronic	c.178+107	e2+107	-	-	-	-	no_errors	Unknown	Unknown	Unknown	33	0	0	11	10	47.62	Somatic	0.999983	11.011	0	0	0
1	127463236	127463236	G	T	SNP	Slc35f5	NM_028787.4	mouse	genbank	58_37k	1	provisional	intronic	c.417+48	e4+48	-	-	-	-	no_errors	Unknown	Unknown	Unknown	64	0	0	19	23	54.76	Somatic	1	25.8798	1	0	0
1	128119221	128119221	T	A	SNP	Nckap5	NM_001081756.1	mouse	genbank	58_37k	-1	validated	missense	c.547	p.S183C	-	NULL	NULL	-	no_errors	Unknown	Unknown	Unknown	121	0	0	47	64	57.14	Somatic	1	59.8001	0	0	0
1	130090037	130090037	G	T	SNP	R3hdm1	NM_181750.2	mouse	genbank	58_37k	1	validated	missense	c.1729	p.D577Y	-	NULL	HMMPfam_R3H,HMMSmart_SM00393,superfamily_R3H domain	-	no_errors	Unknown	Unknown	Unknown	36	0	0	13	14	51.85	Somatic	0.999999	14.3132	43	27	38.57
1	130198000	130198000	G	A	SNP	Lct	NM_001081078.1	mouse	genbank	58_37k	-1	provisional	intronic	c.2360-28	e8-28	-	-	-	-	no_errors	Unknown	Unknown	Unknown	37	0	0	21	10	32.26	Somatic	0.999803	8.53033	0	0	0
1	130200858	130200858	G	A	SNP	Lct	NM_001081078.1	mouse	genbank	58_37k	-1	provisional	silent	c.1830	p.P610	-	HMMPfam_Glyco_hydro_1,superfamily_(Trans)glycosidases	HMMPfam_Glyco_hydro_1,superfamily_(Trans)glycosidases,PatternScan_GLYCOSYL_HYDROL_F1_1,PatternScan_GLYCOSYL_HYDROL_F1_2	-	no_errors	Unknown	Unknown	Unknown	14	0	0	10	6	37.5	Somatic	0.98639	4.28636	0	0	0
1	130204192	130204192	C	A	SNP	Lct	NM_001081078.1	mouse	genbank	58_37k	-1	provisional	missense	c.1654	p.G552C	-	HMMPfam_Glyco_hydro_1,superfamily_(Trans)glycosidases	HMMPfam_Glyco_hydro_1,superfamily_(Trans)glycosidases,PatternScan_GLYCOSYL_HYDROL_F1_1,PatternScan_GLYCOSYL_HYDROL_F1_2	-	no_errors	Unknown	Unknown	Unknown	31	0	0	16	7	30.43	Somatic	0.998311	6.38169	0	0	0
1	130204375	130204375	C	A	SNP	Lct	NM_001081078.1	mouse	genbank	58_37k	-1	provisional	missense	c.1471	p.V491L	-	HMMPfam_Glyco_hydro_1,superfamily_(Trans)glycosidases	HMMPfam_Glyco_hydro_1,superfamily_(Trans)glycosidases,PatternScan_GLYCOSYL_HYDROL_F1_1,PatternScan_GLYCOSYL_HYDROL_F1_2	-	no_errors	Unknown	Unknown	Unknown	44	0	0	32	23	41.82	Somatic	1	15.8391	0	0	0
1	130204377	130204377	T	C	SNP	Lct	NM_001081078.1	mouse	genbank	58_37k	-1	provisional	missense	c.1469	p.Q490R	-	HMMPfam_Glyco_hydro_1,superfamily_(Trans)glycosidases	HMMPfam_Glyco_hydro_1,superfamily_(Trans)glycosidases,PatternScan_GLYCOSYL_HYDROL_F1_1,PatternScan_GLYCOSYL_HYDROL_F1_2	-	no_errors	Unknown	Unknown	Unknown	45	0	0	32	23	41.82	Somatic	1	16.092	0	0	0
1	130204394	130204394	G	A	SNP	Lct	NM_001081078.1	mouse	genbank	58_37k	-1	provisional	silent	c.1452	p.D484	-	HMMPfam_Glyco_hydro_1,superfamily_(Trans)glycosidases	HMMPfam_Glyco_hydro_1,superfamily_(Trans)glycosidases,PatternScan_GLYCOSYL_HYDROL_F1_1,PatternScan_GLYCOSYL_HYDROL_F1_2	-	no_errors	Unknown	Unknown	Unknown	49	0	0	27	26	49.06	Somatic	1	20.6812	0	0	0
1	131574665	131574665	C	G	SNP	Thsd7b	NM_172485.3	mouse	genbank	58_37k	1	validated	missense	c.1565	p.T522R	-	HMMPfam_TSP_1,HMMSmart_TSP1,superfamily_TSP1	HMMPfam_TSP_1,HMMSmart_TSP1,superfamily_TSP1	-	no_errors	Unknown	Unknown	Unknown	38	0	0	15	14	46.67	Somatic	0.999999	13.8762	0	0	0
1	132310638	132310638	G	A	SNP	Daf2	NM_007827.2	mouse	genbank	58_37k	-1	validated	missense	c.838	p.P280S	-	HMMPfam_Sushi,HMMSmart_SM00032,superfamily_Complement control module/SCR domain	HMMPfam_Sushi,HMMSmart_SM00032,superfamily_Complement control module/SCR domain	-	no_errors	Unknown	Unknown	Unknown	79	0	0	25	31	55.36	Somatic	1	33.4537	0	0	0
1	132511664	132511664	G	T	SNP	Zp3r	NM_009581.2	mouse	genbank	58_37k	-1	validated	intronic	c.377+72	e3+72	-	-	-	-	no_errors	Unknown	Unknown	Unknown	106	0	0	49	47	48.96	Somatic	1	41.9956	0	0	0
1	132533377	132533377	G	T	SNP	C4bp	NM_007576.3	mouse	genbank	58_37k	-1	validated	silent	c.1146	p.V382	-	HMMPfam_Sushi,HMMSmart_CCP,superfamily_Complement_control_module	HMMPfam_Sushi,HMMSmart_CCP,superfamily_Complement_control_module	-	no_errors	Unknown	Unknown	Unknown	109	0	0	45	48	51.61	Somatic	1	45.2519	0	0	0
1	132544675	132544675	G	T	SNP	C4bp	NM_007576.3	mouse	genbank	58_37k	-1	validated	missense	c.655	p.P219T	-	HMMPfam_Sushi,HMMSmart_CCP,superfamily_Complement_control_module	HMMPfam_Sushi,HMMSmart_CCP,superfamily_Complement_control_module	-	no_errors	Unknown	Unknown	Unknown	12	0	0	6	4	40	Somatic	0.972669	3.58034	0	0	0
1	132954904	132954904	C	A	SNP	Mapkapk2	NM_008551.1	mouse	genbank	58_37k	-1	provisional	intronic	c.442+25	e3+25	-	-	-	-	no_errors	Unknown	Unknown	Unknown	46	0	0	33	28	45.9	Somatic	1	18.9654	1	0	0
1	133194905	133194905	T	A	SNP	Srgap2	NM_001081011.2	mouse	genbank	58_37k	-1	validated	splice_region	c.2438+4	e20+4	-	-	-	-	no_errors	Unknown	Unknown	Unknown	28	0	0	15	12	44.44	Somatic	0.999956	10.0235	1	1	50
1	133224886	133224886	C	-	DEL	Srgap2	NM_001081011.2	mouse	genbank	58_37k	-1	validated	intronic	c.1492+1205	e12+1205	-	-	-	-	no_errors	Unknown	Unknown	Unknown	40	0	0	25	12	32.43	Somatic	0.999933	9.60376	1	0	0
1	133661516	133661516	C	A	SNP	Slc26a9	NM_177243.4	mouse	genbank	58_37k	1	validated	intronic	c.2056-48	e17-48	-	-	-	-	no_errors	Unknown	Unknown	Unknown	67	0	0	38	25	39.68	Somatic	1	20.6511	0	0	0
1	133738562	133738562	A	T	SNP	Slc41a1	NM_173865.3	mouse	genbank	58_37k	1	validated	missense	c.842	p.K281M	-	NULL	HMMPfam_MgtE	-	no_errors	Unknown	Unknown	Unknown	42	0	0	20	15	42.86	Somatic	0.999999	13.646	53	54	50.47
1	133821114	133821114	A	T	SNP	Nucks1	NM_175294.3	mouse	genbank	58_37k	1	validated	intronic	c.174-49	e4-49	-	-	-	-	no_errors	Unknown	Unknown	Unknown	27	0	0	20	18	47.37	Somatic	0.999992	11.7932	0	0	0
1	134019019	134019019	C	A	SNP	Cdk18	NM_008795.2	mouse	genbank	58_37k	-1	validated	5_prime_untranslated_region	c.-7	NULL	-	-	-	-	no_errors	Unknown	Unknown	Unknown	46	0	0	32	20	38.46	Somatic	0.999999	14.4801	10	3	23.08
1	134415026	134415026	C	T	SNP	Cntn2	NM_177129.5	mouse	genbank	58_37k	-1	validated	intronic	c.2438-40	e18-40	-	-	-	-	no_errors	Unknown	Unknown	Unknown	36	0	0	17	22	56.41	Somatic	1	18.31	0	0	0
1	134423001	134423001	G	T	SNP	Cntn2	NM_177129.5	mouse	genbank	58_37k	-1	validated	silent	c.843	p.S281	-	HMMSmart_IGc2,HMMPfam_ig,superfamily_SSF48726	HMMSmart_IGc2,HMMSmart_IG,HMMPfam_fn3,HMMSmart_FN3,superfamily_FN_III-like,HMMPfam_I-set,HMMPfam_ig,superfamily_SSF48726	-	no_errors	Unknown	Unknown	Unknown	28	0	0	12	21	63.64	Somatic	1	17.3608	0	0	0
1	134506872	134506872	C	A	SNP	Nfasc	NM_182716.4	mouse	genbank	58_37k	-1	reviewed	intronic	c.1558+16	e12+16	-	-	-	-	no_errors	Unknown	Unknown	Unknown	53	0	0	27	46	63.01	Somatic	1	34.0608	0	0	0
1	134528269	134528269	G	A	SNP	Nfasc	NM_182716.4	mouse	genbank	58_37k	-1	reviewed	silent	c.699	p.V233	-	HMMSmart_IG,superfamily_SSF48726	HMMSmart_IGc2,HMMSmart_IG,HMMPfam_fn3,HMMSmart_FN3,superfamily_FN_III-like,HMMPfam_I-set,HMMPfam_ig,superfamily_SSF48726	-	no_errors	Unknown	Unknown	Unknown	17	0	0	5	5	50	Somatic	0.997076	5.83514	0	0	0
1	134888201	134888201	G	T	SNP	Mdm4	NM_008575.3	mouse	genbank	58_37k	-1	provisional	3_prime_untranslated_region	c.*32	NULL	-	-	-	-	no_errors	Unknown	Unknown	Unknown	169	0	0	132	13	8.97	Somatic	0.999829	8.67416	86	0	0
1	134893305	134893305	C	A	SNP	Mdm4	NM_008575.3	mouse	genbank	58_37k	-1	provisional	intronic	c.673-19	e8-19	-	-	-	-	no_errors	Unknown	Unknown	Unknown	61	0	0	29	25	46.3	Somatic	1	22.3177	5	1	16.67
1	134963534	134963534	C	A	SNP	Pik3c2b	ENSMUST00000077730	mouse	ensembl	58_37k	1	known	missense	c.658	p.H220N	-	NULL	HMMPfam_C2,HMMSmart_SM00239,HMMPfam_PI3K_rbd,HMMSmart_SM00144,HMMPfam_PI3_PI4_kinase,HMMSmart_SM00146,HMMPfam_PI3Ka,HMMSmart_SM00145,HMMPfam_PX,HMMSmart_SM00312,superfamily_PX domain,HMMPfam_PI3K_C2,HMMSmart_SM00142,superfamily_C2 domain (Calcium/lipid-bi	-	no_errors	Unknown	Unknown	Unknown	110	0	0	52	68	56.67	Somatic	1	56.4278	3	0	0
1	135251322	135251322	A	T	SNP	Ren1	ENSMUST00000112288	mouse	ensembl	58_37k	1	known	intronic	c.313-57	e3-57	-	-	-	-	no_errors	Unknown	Unknown	Unknown	217	0	0	162	18	9.94	Somatic	0.999997	12.5739	0	0	0
1	135285468	135285468	C	A	SNP	Sox13	NM_011439.2	mouse	genbank	58_37k	-1	validated	intronic	c.639+38	e5+38	-	-	-	-	no_errors	Unknown	Unknown	Unknown	33	0	0	13	11	45.83	Somatic	0.999985	11.0758	0	0	0
1	136042367	136042367	G	T	SNP	Chit1	NM_027979.1	mouse	genbank	58_37k	1	provisional	intronic	c.605+75	e6+75	-	-	-	-	no_errors	Unknown	Unknown	Unknown	17	0	0	9	5	35.71	Somatic	0.987871	4.40046	0	0	0
1	136084678	136084678	A	T	SNP	Chi3l1	NM_007695.3	mouse	genbank	58_37k	1	validated	intronic	c.714+108	e7+108	-	-	-	-	no_errors	Unknown	Unknown	Unknown	24	0	0	6	9	60	Somatic	0.999978	10.7316	0	0	0
1	136213743	136213743	C	A	SNP	Ppfia4	ENSMUST00000027729	mouse	ensembl	58_37k	-1	known	missense	c.1969	p.D657Y	-	NULL	HMMPfam_SAM_1,HMMSmart_SM00454,superfamily_SAM/Pointed domain,HMMPfam_SAM_2	-	no_errors	Unknown	Unknown	Unknown	21	0	0	9	7	43.75	Somatic	0.998854	6.77059	0	0	0
1	136282731	136282731	G	T	SNP	4933406M09Rik	NM_173771.4	mouse	genbank	58_37k	1	validated	5_prime_untranslated_region	c.-2545	NULL	-	-	-	-	no_errors	Unknown	Unknown	Unknown	36	0	0	15	15	50	Somatic	0.999999	14.2171	0	0	0
1	136368941	136368941	A	G	SNP	Klhl12	NM_153128.2	mouse	genbank	58_37k	1	provisional	intronic	c.568-30	e4-30	-	-	-	-	no_errors	Unknown	Unknown	Unknown	36	0	0	18	13	41.94	Somatic	0.99999	11.5205	1	0	0
1	136380211	136380211	G	T	SNP	Klhl12	NM_153128.2	mouse	genbank	58_37k	1	provisional	intronic	c.833-113	e6-113	-	-	-	-	no_errors	Unknown	Unknown	Unknown	18	0	0	6	7	53.85	Somatic	0.999388	7.40562	0	0	0
1	136385706	136385706	T	A	SNP	Klhl12	NM_153128.2	mouse	genbank	58_37k	1	provisional	splice_region	c.1499+8	e10+8	-	-	-	-	no_errors	Unknown	Unknown	Unknown	36	0	0	21	16	43.24	Somatic	0.999997	12.7188	0	0	0
1	136864479	136864479	G	A	SNP	Ube2t	NM_026024.2	mouse	genbank	58_37k	1	provisional	splice_region	c.109+4	e1+4	-	-	-	-	no_errors	Unknown	Unknown	Unknown	31	0	0	21	28	56	Somatic	1	18.0217	2	2	50
1	136899769	136899769	C	A	SNP	Lgr6	NM_001033409.3	mouse	genbank	58_37k	-1	provisional	splice_region	c.929+8	e9+8	-	-	-	-	no_errors	Unknown	Unknown	Unknown	36	0	0	19	29	60.42	Somatic	1	21.5502	0	0	0
1	136899780	136899780	G	T	SNP	Lgr6	NM_001033409.3	mouse	genbank	58_37k	-1	provisional	missense	c.926	p.T309K	-	superfamily_SSF52058	HMMPfam_7tm_1,PatternScan_G_PROTEIN_RECEP_F1_1,HMMPfam_LRRNT,HMMSmart_LRRNT,HMMPfam_LRR_1,HMMSmart_LRR_TYP,superfamily_SSF52047,superfamily_SSF52058,superfamily_SSF81321	-	no_errors	Unknown	Unknown	Unknown	40	0	0	34	22	39.29	Somatic	0.999999	13.7512	45	30	40
1	136918291	136918291	C	A	SNP	Lgr6	NM_001033409.3	mouse	genbank	58_37k	-1	provisional	intronic	c.716+61	e6+61	-	-	-	-	no_errors	Unknown	Unknown	Unknown	53	0	0	33	26	44.07	Somatic	1	19.6754	0	1	100
1	137008694	137008694	C	T	SNP	ENSMUSG00000073556	ENSMUST00000097567	mouse	ensembl	58_37k	1	known	intronic	c.184-647	e2-647	-	-	-	-	no_errors	Unknown	Unknown	Unknown	8	0	0	7	7	50	Somatic	0.977529	3.97635	0	0	0
1	137008742	137008742	C	G	SNP	ENSMUSG00000073556	ENSMUST00000097567	mouse	ensembl	58_37k	1	known	intronic	c.184-599	e2-599	-	-	-	-	no_errors	Unknown	Unknown	Unknown	21	0	0	14	13	48.15	Somatic	0.999891	9.12862	2	0	0
1	137008896	137008896	G	T	SNP	Ptprv	ENSMUST00000086432	mouse	ensembl	58_37k	-1	known	splice_region	c.16-7	e2-7	-	-	-	-	no_stop_codon	Unknown	Unknown	Unknown	46	0	0	27	26	49.06	Somatic	1	19.8131	0	0	0
1	137013164	137013164	C	T	SNP	Ptprv	NM_007955.3	mouse	genbank	58_37k	-1	validated	silent	c.3255	p.V1085	-	NULL	HMMPfam_Y_phosphatase,HMMSmart_SM00194,HMMSmart_SM00404,HMMPfam_fn3,HMMSmart_SM00060,superfamily_Fibronectin type III,PatternScan_TYR_PHOSPHATASE_1,superfamily_(Phosphotyrosine protein) phosphatases II	-	pseudogene	Unknown	Unknown	Unknown	24	0	0	14	17	54.84	Somatic	0.999996	12.427	0	0	0
1	137030931	137030931	C	A	SNP	Ptpn7	NM_177081.3	mouse	genbank	58_37k	1	provisional	intronic	c.123-86	e2-86	-	-	-	-	no_errors	Unknown	Unknown	Unknown	7	0	0	2	5	71.43	Somatic	0.988076	4.86635	0	1	100
1	137346716	137346716	C	T	SNP	Nav1	NM_173437.2	mouse	genbank	58_37k	-1	validated	intronic	c.5019-48	e27-48	-	-	-	-	no_errors	Unknown	Unknown	Unknown	15	0	0	5	20	80	Somatic	0.999999	15.0651	2	0	0
1	137367711	137367711	A	G	SNP	Nav1	NM_173437.2	mouse	genbank	58_37k	-1	validated	missense	c.1709	p.L570P	-	NULL	HMMSmart_SM00382,PatternScan_PPASE,superfamily_P-loop containing nucleoside triphosphate hydrolases	-	no_errors	Unknown	Unknown	Unknown	36	0	0	23	15	39.47	Somatic	0.999989	11.4524	64	27	29.67
1	137777264	137777264	A	C	SNP	Pkp1	NM_019645.2	mouse	genbank	58_37k	-1	provisional	intronic	c.1506+35	e8+35	-	-	-	-	no_errors	Unknown	Unknown	Unknown	26	0	0	15	14	48.28	Somatic	0.999981	10.8547	0	0	0
1	137780587	137780587	A	T	SNP	Pkp1	NM_019645.2	mouse	genbank	58_37k	-1	provisional	silent	c.1122	p.P374	-	HMMSmart_SM00185,superfamily_ARM repeat	HMMPfam_Arm,HMMSmart_SM00185,superfamily_ARM repeat	-	no_errors	Unknown	Unknown	Unknown	41	0	0	18	25	58.14	Somatic	1	21.4969	0	0	0
1	137786366	137786366	G	C	SNP	Pkp1	NM_019645.2	mouse	genbank	58_37k	-1	provisional	missense	c.607	p.R203G	-	NULL	HMMPfam_Arm,HMMSmart_SM00185,superfamily_ARM repeat	-	no_errors	Unknown	Unknown	Unknown	91	0	0	44	43	48.86	Somatic	1	37.2011	0	0	0
1	137995094	137995094	T	A	SNP	Cacna1s	NM_001081023.1	mouse	genbank	58_37k	1	provisional	intronic	c.3256-15	e26-15	-	-	-	-	no_errors	Unknown	Unknown	Unknown	116	0	0	60	56	48.28	Somatic	1	46.7163	0	0	0
1	137998175	137998175	G	A	SNP	Cacna1s	NM_001081023.1	mouse	genbank	58_37k	1	provisional	intronic	c.3609+36	e28+36	-	-	-	-	no_errors	Unknown	Unknown	Unknown	138	0	0	51	54	51.43	Somatic	1	54.5941	0	0	0
1	138003512	138003512	A	T	SNP	Cacna1s	NM_001081023.1	mouse	genbank	58_37k	1	provisional	intronic	c.3954-82	e33-82	-	-	-	-	no_errors	Unknown	Unknown	Unknown	23	0	0	9	9	50	Somatic	0.999859	8.87008	0	0	0
1	138044048	138044048	C	A	SNP	Kif21b	NM_001039472.1	mouse	genbank	58_37k	1	provisional	intronic	c.448-27	e4-27	-	-	-	-	no_errors	Unknown	Unknown	Unknown	90	0	0	49	51	51	Somatic	1	40.3203	0	0	0
1	140743874	140743874	C	G	SNP	Lhx9	ENSMUST00000138932	mouse	ensembl	58_37k	-1	known	5_prime_untranslated_region	c.-140743874	NULL	-	-	-	-	no_coding_region	Unknown	Unknown	Unknown	26	0	0	12	14	53.85	Somatic	0.999994	12.0835	0	0	0
1	141133472	141133472	C	A	SNP	Crb1	NM_133239.2	mouse	genbank	58_37k	-1	validated	missense	c.3673	p.G1225W	-	HMMPfam_EGF,HMMSmart_EGF,superfamily_SSF57196	PatternScan_ASX_HYDROXYL,HMMSmart_LamG,HMMSmart_EGF_CA,HMMPfam_EGF,HMMSmart_EGF,superfamily_ConA_like_lec_gl,HMMPfam_Laminin_G_2,PatternScan_EGF_1,PatternScan_EGF_2,PatternScan_EGF_CA,PatternScan_C_TYPE_LECTIN_1,superfamily_SSF57196	-	no_errors	Unknown	Unknown	Unknown	52	0	0	14	7	33.33	Somatic	0.999896	9.17554	0	0	0
1	141144595	141144595	C	A	SNP	Crb1	ENSMUST00000112009	mouse	ensembl	58_37k	-1	known	missense	c.1110	p.Q370H	-	NULL	PatternScan_ASX_HYDROXYL,HMMSmart_LamG,HMMSmart_EGF_CA,HMMPfam_EGF,HMMSmart_EGF,superfamily_ConA_like_lec_gl,HMMPfam_Laminin_G_2,PatternScan_EGF_1,PatternScan_EGF_2,PatternScan_EGF_CA,superfamily_SSF57196	-	no_errors	Unknown	Unknown	Unknown	58	0	0	20	20	50	Somatic	1	21.2801	0	0	0
1	141326874	141326874	G	T	SNP	Zbtb41	NM_172643.5	mouse	genbank	58_37k	1	validated	missense	c.613	p.A205S	-	NULL	HMMPfam_zf-C2H2,PatternScan_ZINC_FINGER_C2H2_1,HMMSmart_ZnF_C2H2,superfamily_SSF57667	-	no_errors	Unknown	Unknown	Unknown	80	0	0	21	10	32.26	Somatic	0.999998	13.308	88	57	39.31
1	141400571	141400571	C	T	SNP	F13b	NM_031164.2	mouse	genbank	58_37k	1	validated	intronic	c.265+33	e2+33	-	-	-	-	no_errors	Unknown	Unknown	Unknown	42	0	0	17	18	51.43	Somatic	1	17.2036	0	0	0
1	141400579	141400579	G	T	SNP	F13b	NM_031164.2	mouse	genbank	58_37k	1	validated	intronic	c.265+41	e2+41	-	-	-	-	no_errors	Unknown	Unknown	Unknown	41	0	0	13	15	53.57	Somatic	1	16.3788	0	0	0
1	142016711	142016711	G	T	SNP	Cfh	NM_009888.3	mouse	genbank	58_37k	-1	validated	intronic	c.1391-81	e10-81	-	-	-	-	no_errors	Unknown	Unknown	Unknown	53	0	0	5	5	50	Somatic	0.999955	10.0005	0	0	0
1	142051230	142051230	C	A	SNP	Cfh	NM_009888.3	mouse	genbank	58_37k	-1	validated	missense	c.489	p.K163N	-	superfamily_Complement control module/SCR domain	HMMPfam_Sushi,HMMSmart_SM00032,PatternScan_ZINC_FINGER_C2H2_1,superfamily_Complement control module/SCR domain	-	no_errors	Unknown	Unknown	Unknown	197	0	0	77	75	49.02	Somatic	1	74.2863	8	17	68
1	152271859	152271859	G	T	SNP	Tpr	NM_133780.3	mouse	genbank	58_37k	1	validated	silent	c.3669	p.R1223	-	HMMPfam_TPR_MLP1_2	superfamily_Prefoldin,HMMPfam_TPR_MLP1_2	-	no_errors	Unknown	Unknown	Unknown	44	0	0	10	17	62.96	Somatic	1	20.8412	232	180	43.69
1	152280915	152280915	G	T	SNP	Tpr	NM_133780.3	mouse	genbank	58_37k	1	validated	missense	c.5069	p.R1690M	-	NULL	superfamily_Prefoldin,HMMPfam_TPR_MLP1_2	-	no_errors	Unknown	Unknown	Unknown	26	0	0	12	12	50	Somatic	0.999976	10.6572	282	284	50.18
1	152522513	152522513	A	G	SNP	Hmcn1	ENSMUST00000074783	mouse	ensembl	58_37k	-1	known	intronic	c.7990+130	e51+130	-	-	-	-	no_errors	Unknown	Unknown	Unknown	31	0	0	14	6	30	Somatic	0.997385	5.94389	0	0	0
1	152570597	152570597	A	T	SNP	Hmcn1	ENSMUST00000074783	mouse	ensembl	58_37k	-1	known	missense	c.4697	p.L1566Q	-	HMMSmart_SM00406,HMMSmart_SM00408,HMMSmart_SM00409,HMMPfam_I-set,superfamily_Immunoglobulin	PatternScan_ASX_HYDROXYL,HMMPfam_TSP_1,HMMSmart_SM00209,superfamily_TSP-1 type 1 repeat,HMMSmart_SM00179,HMMSmart_SM00406,HMMSmart_SM00408,HMMSmart_SM00409,HMMPfam_EGF,HMMSmart_SM00181,HMMPfam_G2F,HMMSmart_SM00682,superfamily_GFP-like,PatternScan_EGF_2,HM	-	no_errors	Unknown	Unknown	Unknown	23	0	0	9	12	57.14	Somatic	0.999986	11.2097	0	0	0
1	152656854	152656854	C	A	SNP	Hmcn1	ENSMUST00000074783	mouse	ensembl	58_37k	-1	known	silent	c.984	p.T328	-	NULL	PatternScan_ASX_HYDROXYL,HMMPfam_TSP_1,HMMSmart_SM00209,superfamily_TSP-1 type 1 repeat,HMMSmart_SM00179,HMMSmart_SM00406,HMMSmart_SM00408,HMMSmart_SM00409,HMMPfam_EGF,HMMSmart_SM00181,HMMPfam_G2F,HMMSmart_SM00682,superfamily_GFP-like,PatternScan_EGF_2,HM	-	no_errors	Unknown	Unknown	Unknown	31	0	0	10	10	50	Somatic	0.999984	11.0663	1	0	0
1	153226568	153226568	C	T	SNP	1200016B10Rik	NM_025819.4	mouse	genbank	58_37k	-1	validated	missense	c.2407	p.V803M	-	NULL	HMMSmart_SM00670,superfamily_PIN domain-like	-	no_errors	Unknown	Unknown	Unknown	48	0	0	21	19	47.5	Somatic	1	17.7497	42	35	45.45
1	153295533	153295533	G	T	SNP	1190005F20Rik	NM_026876.3	mouse	genbank	58_37k	1	validated	missense	c.1000	p.G334C	-	HMMPfam_TRM,superfamily_S-adenosyl-L-methionine-dependent methyltransferases	HMMPfam_TRM,PatternScan_ZINC_FINGER_C2H2_1,HMMSmart_SM00355,superfamily_S-adenosyl-L-methionine-dependent methyltransferases	-	no_errors	Unknown	Unknown	Unknown	16	0	0	27	14	34.15	Somatic	0.994995	5.29265	95	90	48.13
1	155097098	155097098	C	T	SNP	Lamc1	NM_010683.2	mouse	genbank	58_37k	-1	validated	splice_site	c.1559-1	e9-1	-	-	-	-	no_errors	Unknown	Unknown	Unknown	73	0	0	31	28	47.46	Somatic	1	26.6584	0	15	100
1	155098167	155098167	C	A	SNP	Lamc1	NM_010683.2	mouse	genbank	58_37k	-1	validated	intronic	c.1322+40	e6+40	-	-	-	-	no_errors	Unknown	Unknown	Unknown	98	0	0	36	41	53.25	Somatic	1	41.0757	5	1	16.67
1	155280398	155280398	C	A	SNP	1700012A16Rik	NM_001033162.2	mouse	genbank	58_37k	1	predicted	silent	c.607	p.R203	-	NULL	HMMSmart_PbH1,HMMSmart_CASH,superfamily_Pectin_lyas_like	-	no_errors	Unknown	Unknown	Unknown	75	0	0	45	32	41.56	Somatic	1	25.2038	0	0	0
1	155691297	155691297	G	T	SNP	Rgsl1	XM_994482.2	mouse	genbank	58_37k	-1	model	5_prime_flanking_region	c.-53	NULL	-	-	-	-	no_errors	Unknown	Unknown	Unknown	30	0	0	20	27	56.25	Somatic	1	17.5281	0	0	0
1	156289174	156289174	G	T	SNP	Cacna1e	NM_009782.3	mouse	genbank	58_37k	-1	reviewed	intronic	c.4503+88	e31+88	-	-	-	-	no_errors	Unknown	Unknown	Unknown	10	0	0	4	6	60	Somatic	0.99457	5.38667	0	0	0
1	156312781	156312781	G	T	SNP	Cacna1e	NM_009782.3	mouse	genbank	58_37k	-1	reviewed	intronic	c.3728+68	e25+68	-	-	-	-	no_errors	Unknown	Unknown	Unknown	63	0	0	23	25	52.08	Somatic	1	25.3495	0	0	0
1	156324904	156324904	A	C	SNP	Cacna1e	NM_009782.3	mouse	genbank	58_37k	-1	reviewed	silent	c.2235	p.P745	-	NULL	HMMPfam_Ion_trans,HMMPfam_Ca_chan_IQ,superfamily_Voltage-gated potassium channels	-	no_errors	Unknown	Unknown	Unknown	129	0	0	49	50	50.51	Somatic	1	50.0192	0	0	0
1	156332853	156332853	C	T	SNP	Cacna1e	NM_009782.3	mouse	genbank	58_37k	-1	reviewed	silent	c.1581	p.K527	-	HMMPfam_Ion_trans,superfamily_Voltage-gated potassium channels	HMMPfam_Ion_trans,HMMPfam_Ca_chan_IQ,superfamily_Voltage-gated potassium channels	-	no_errors	Unknown	Unknown	Unknown	46	0	0	21	17	44.74	Somatic	1	15.7186	0	0	0
1	156335313	156335313	T	G	SNP	Cacna1e	NM_009782.3	mouse	genbank	58_37k	-1	reviewed	intronic	c.1229-50	e10-50	-	-	-	-	no_errors	Unknown	Unknown	Unknown	42	0	0	28	4	12.5	Somatic	0.954966	3.08221	0	0	0
1	157025078	157025078	G	T	SNP	Stx6	NM_021433.3	mouse	genbank	58_37k	1	validated	missense	c.300	p.R100S	-	superfamily_t-snare proteins,HMMPfam_Syntaxin-6_N	HMMPfam_SNARE,HMMSmart_SM00397,PatternScan_SYNTAXIN,superfamily_t-snare proteins,HMMPfam_Syntaxin-6_N	-	no_errors	Unknown	Unknown	Unknown	19	0	0	10	10	50	Somatic	0.999708	8.14757	134	125	48.26
1	157771754	157771754	C	A	SNP	Cep350	ENSMUST00000138762	mouse	ensembl	58_37k	-1	known	missense	c.3479	p.G1160V	-	NULL	HMMPfam_CAP_GLY,PatternScan_CAP_GLY_1,superfamily_Cap-Gly domain	-	no_errors	Unknown	Unknown	Unknown	11	0	0	1	7	87.5	Somatic	0.999769	9.17543	50	40	44.44
1	157787894	157787894	C	T	SNP	Cep350	ENSMUST00000138762	mouse	ensembl	58_37k	-1	known	missense	c.1184	p.R395Q	-	NULL	HMMPfam_CAP_GLY,PatternScan_CAP_GLY_1,superfamily_Cap-Gly domain	-	no_errors	Unknown	Unknown	Unknown	323	0	0	103	87	45.79	Somatic	1	99.2666	62	38	38
1	157787896	157787896	T	G	SNP	Cep350	ENSMUST00000138762	mouse	ensembl	58_37k	-1	known	silent	c.1182	p.V394	-	NULL	HMMPfam_CAP_GLY,PatternScan_CAP_GLY_1,superfamily_Cap-Gly domain	-	no_errors	Unknown	Unknown	Unknown	323	0	0	101	85	45.7	Somatic	1	98.1211	59	38	39.18
1	157877541	157877541	C	A	SNP	Tor1aip1	NM_144791.2	mouse	genbank	58_37k	-1	validated	nonsense	c.634	p.G212*	-	HMMPfam_LAP1C	HMMPfam_LAP1C	-	no_errors	Unknown	Unknown	Unknown	73	0	0	26	29	52.73	Somatic	1	29.7165	198	22	10
1	157909269	157909269	G	T	SNP	Tor1aip2	NM_172843.4	mouse	genbank	58_37k	1	validated	missense	c.619	p.D207Y	-	HMMPfam_LAP1C	HMMPfam_LAP1C	-	no_errors	Unknown	Unknown	Unknown	22	0	0	19	6	24	Somatic	0.981142	3.95182	374	36	8.78
1	158327759	158327764	ATATAT	-	DEL	9430070O13Rik	NM_001033180.2	mouse	genbank	58_37k	-1	predicted	intronic	c.3-91_3-86	e2-86	-	-	-	-	no_errors	Unknown	Unknown	Unknown	NA	NA	NA	NA	NA	NA	Somatic	NA	NA	NA	NA	NA
1	158396948	158396948	C	A	SNP	Soat1	NM_009230.3	mouse	genbank	58_37k	-1	validated	intronic	c.1-19	e1-19	-	-	-	-	no_errors	Unknown	Unknown	Unknown	84	0	0	44	39	46.99	Somatic	1	32.5414	0	2	100
1	158817173	158817173	C	T	SNP	Ralgps2	NM_023884.4	mouse	genbank	58_37k	-1	validated	intronic	c.387+49	e5+49	-	-	-	-	no_errors	Unknown	Unknown	Unknown	73	0	0	26	21	44.68	Somatic	1	22.602	0	0	0
1	158831799	158831799	A	T	SNP	Ralgps2	NM_023884.4	mouse	genbank	58_37k	-1	validated	intronic	c.162+118	e2+118	-	-	-	-	no_errors	Unknown	Unknown	Unknown	62	0	0	28	28	50	Somatic	1	25.2168	0	0	0
1	158973654	158973655	-	T	INS	ENSMUSG00000073531	ENSMUST00000097519	mouse	ensembl	58_37k	1	known	5_prime_flanking_region	c.-90	NULL	-	-	-	-	no_errors	Unknown	Unknown	Unknown	54	1	1.82	30	6	16.67	Somatic	0.964767	3.31014	0	0	0
1	159483128	159483128	C	A	SNP	Sec16b	NM_033354.3	mouse	genbank	58_37k	1	validated	missense	c.1704	p.H568Q	-	NULL	NULL	-	no_errors	Unknown	Unknown	Unknown	82	0	0	92	15	14.02	Somatic	0.999726	8.2023	2	0	0
1	160176467	160176467	G	T	SNP	Fam5b	NM_207583.2	mouse	genbank	58_37k	-1	validated	silent	c.2214	p.L738	-	NULL	HMMPfam_MACPF,HMMSmart_MACPF,HMMSmart_EGF	-	no_errors	Unknown	Unknown	Unknown	75	0	0	28	26	48.15	Somatic	1	26.6815	0	0	0
1	162076377	162076377	C	A	SNP	Tnn	NM_177839.3	mouse	genbank	58_37k	-1	validated	missense	c.550	p.G184W	-	HMMPfam_EGF_2	HMMPfam_Fibrinogen_C,HMMSmart_FBG,PatternScan_FIBRIN_AG_C_DOMAIN,superfamily_Fibrinogen_a/b/g_C,HMMPfam_fn3,HMMSmart_FN3,HMMSmart_EGF,superfamily_FN_III-like,PatternScan_EGF_1,PatternScan_EGF_2,HMMPfam_EGF_2	-	no_errors	Unknown	Unknown	Unknown	11	0	0	3	4	57.14	Somatic	0.989972	4.6438	0	0	0
1	163345203	163345203	G	A	SNP	Tnfsf4	NM_009452.2	mouse	genbank	58_37k	1	validated	intronic	c.205+62	e2+62	-	-	-	-	no_errors	Unknown	Unknown	Unknown	66	0	0	21	30	58.82	Somatic	1	31.3889	0	0	0
1	164636172	164636172	C	A	SNP	Bat2l2	NM_001081290.1	mouse	genbank	58_37k	-1	provisional	nonsense	c.3004	p.E1002*	-	NULL	HMMPfam_BAT2_N	-	no_errors	Unknown	Unknown	Unknown	234	1	0.43	105	116	52.49	Somatic	1	99.7997	113	33	22.6
1	164766263	164766263	C	A	SNP	Fmo1	NM_010231.2	mouse	genbank	58_37k	-1	provisional	missense	c.827	p.R276M	-	HMMPfam_FMO-like,superfamily_SSF51905	HMMPfam_FMO-like,superfamily_SSF51905	-	no_errors	Unknown	Unknown	Unknown	91	0	0	39	44	53.01	Somatic	1	40.0967	0	0	0
1	165744516	165744516	G	C	SNP	Kifap3	NM_010629.2	mouse	genbank	58_37k	1	provisional	silent	c.534	p.A178	-	HMMPfam_KAP,superfamily_ARM repeat	HMMSmart_SM00185,HMMPfam_KAP,superfamily_ARM repeat	-	no_errors	Unknown	Unknown	Unknown	67	0	0	27	32	54.24	Somatic	1	30.0413	55	83	60.14
1	165881979	165881979	T	G	SNP	Scyl3	NM_028776.4	mouse	genbank	58_37k	1	provisional	intronic	c.1472-89	e12-89	-	-	-	-	no_errors	Unknown	Unknown	Unknown	29	0	0	9	11	55	Somatic	0.999994	12.0398	2	3	60
1	166064244	166064244	C	A	SNP	Selp	NM_011347.1	mouse	genbank	58_37k	1	provisional	intronic	c.1333+61	e8+61	-	-	-	-	no_errors	Unknown	Unknown	Unknown	54	0	0	28	17	37.78	Somatic	1	15.0251	0	0	0
1	166115252	166115252	C	T	SNP	F5	NM_007976.2	mouse	genbank	58_37k	1	validated	nonsense	c.1603	p.Q535*	-	superfamily_Cupredoxin	HMMPfam_F5_F8_type_C,HMMSmart_FA58C,PatternScan_FA58C_1,PatternScan_FA58C_2,PatternScan_MULTICOPPER_OXIDASE1,superfamily_Cupredoxin,superfamily_Gal_bind_like,HMMPfam_LSPR,HMMPfam_Cu-oxidase_3	-	no_errors	Unknown	Unknown	Unknown	16	0	0	6	4	40	Somatic	0.986209	4.27148	2	0	0
1	166117119	166117119	G	T	SNP	F5	NM_007976.2	mouse	genbank	58_37k	1	validated	intronic	c.1756+71	e11+71	-	-	-	-	no_errors	Unknown	Unknown	Unknown	6	0	0	3	5	62.5	Somatic	0.96534	3.77178	0	0	0
1	166373289	166373289	C	T	SNP	Atp1b1	NM_009721.5	mouse	genbank	58_37k	-1	provisional	intronic	c.382+37	e3+37	-	-	-	-	no_errors	Unknown	Unknown	Unknown	73	0	0	39	28	41.79	Somatic	1	23.7889	0	0	0
1	166739065	166739065	G	T	SNP	Dpt	NM_019759.2	mouse	genbank	58_37k	1	provisional	missense	c.334	p.V112L	-	NULL	NULL	-	no_errors	Unknown	Unknown	Unknown	22	0	0	20	8	28.57	Somatic	0.993379	5.01084	1	1	50
1	167072507	167072507	G	T	SNP	Tbx19	NM_032005.4	mouse	genbank	58_37k	-1	provisional	intronic	c.910+33	e6+33	-	-	-	-	no_errors	Unknown	Unknown	Unknown	8	0	0	5	4	44.44	Somatic	0.949488	3.01205	0	0	0
1	167236748	167236748	G	T	SNP	Gpr161	NM_001081126.1	mouse	genbank	58_37k	1	provisional	intronic	c.461+25	e3+25	-	-	-	-	no_errors	Unknown	Unknown	Unknown	48	0	0	15	13	46.43	Somatic	1	14.9549	0	0	0
1	167473562	167473562	G	A	SNP	Adcy10	NM_173029.3	mouse	genbank	58_37k	1	validated	intronic	c.2174+104	e16+104	-	-	-	-	no_errors	Unknown	Unknown	Unknown	26	0	0	8	13	61.9	Somatic	0.999999	13.4999	0	0	0
1	167586081	167586081	G	T	SNP	Rcsd1	NM_178593.3	mouse	genbank	58_37k	-1	validated	nonsense	c.561	p.Y187*	-	NULL	NULL	-	no_errors	Unknown	Unknown	Unknown	196	0	0	91	102	52.85	Somatic	1	88.3801	0	0	0
1	168029110	168029110	G	T	SNP	Dusp27	NM_001033344.3	mouse	genbank	58_37k	-1	validated	missense	c.3063	p.F1021L	-	NULL	HMMPfam_DSPc,PatternScan_TYR_PHOSPHATASE_1,HMMSmart_DSPc,superfamily_SSF52799	-	no_errors	Unknown	Unknown	Unknown	77	0	0	22	39	63.93	Somatic	1	41.5099	0	0	0
1	168029848	168029848	G	T	SNP	Dusp27	NM_001033344.3	mouse	genbank	58_37k	-1	validated	missense	c.2325	p.D775E	-	NULL	HMMPfam_DSPc,PatternScan_TYR_PHOSPHATASE_1,HMMSmart_DSPc,superfamily_SSF52799	-	no_errors	Unknown	Unknown	Unknown	120	0	0	64	47	42.34	Somatic	1	39.8549	0	0	0
1	168093946	168093946	C	T	SNP	Gpa33	NM_021610.1	mouse	genbank	58_37k	1	provisional	missense	c.614	p.T205I	-	HMMSmart_SM00408,HMMSmart_SM00409,HMMPfam_ig,superfamily_Immunoglobulin	HMMSmart_SM00406,HMMSmart_SM00408,HMMSmart_SM00409,HMMPfam_V-set,HMMPfam_ig,superfamily_Immunoglobulin	-	no_errors	Unknown	Unknown	Unknown	44	0	0	17	7	29.17	Somatic	0.999506	7.61234	0	0	0
1	168095131	168095132	-	T	INS	Gpa33	NM_021610.1	mouse	genbank	58_37k	1	provisional	intronic	c.828-147_828-146	e7-146	-	-	-	-	no_errors	Unknown	Unknown	Unknown	11	0	0	3	4	57.14	Somatic	0.989972	4.6438	0	0	0
1	168424678	168424678	G	T	SNP	Gm4846	ENSMUST00000143922	mouse	ensembl	58_37k	-1	known	missense	c.450	p.H150Q	-	HMMPfam_FMO-like,superfamily_SSF51905	HMMPfam_FMO-like,superfamily_SSF51905	-	no_errors	Unknown	Unknown	Unknown	101	0	0	81	7	7.95	Somatic	0.988734	4.49063	0	0	0
1	168565196	168565196	C	-	DEL	Gm4847	ENSMUST00000046662	mouse	ensembl	58_37k	-1	known	frame_shift_del	c.855	p.S286fs	-	HMMPfam_FMO-like,superfamily_FAD/NAD(P)-binding domain	HMMPfam_FMO-like,superfamily_FAD/NAD(P)-binding domain	-	no_errors	Unknown	Unknown	Unknown	83	0	0	46	31	40.26	Somatic	1	25.9223	0	0	0
1	169564722	169564722	G	C	SNP	Rxrg	NM_009107.3	mouse	genbank	58_37k	1	validated	intronic	c.1138+65	e8+65	-	-	-	-	no_errors	Unknown	Unknown	Unknown	32	0	0	19	15	44.12	Somatic	0.999992	11.7206	0	0	0
1	169771015	169771015	G	T	SNP	Lmx1a	NM_033652.5	mouse	genbank	58_37k	1	provisional	intronic	c.748-19	e6-19	-	-	-	-	no_errors	Unknown	Unknown	Unknown	44	0	0	25	19	43.18	Somatic	1	15.3776	0	0	0
1	171863885	171863885	G	C	SNP	1700084C01Rik	NM_001033185.2	mouse	genbank	58_37k	1	predicted	missense	c.421	p.G141R	-	NULL	NULL	-	no_errors	Unknown	Unknown	Unknown	103	0	0	43	48	52.75	Somatic	1	44.5661	0	0	0
1	172611371	172611371	G	A	SNP	Olfml2b	NM_177068.4	mouse	genbank	58_37k	1	validated	intronic	c.1639+27	e7+27	-	-	-	-	no_errors	Unknown	Unknown	Unknown	11	0	0	12	8	40	Somatic	0.983833	4.13092	0	0	0
1	172898350	172898350	A	T	SNP	Fcgr2b	NM_001077189.1	mouse	genbank	58_37k	-1	validated	missense	c.140	p.V47E	-	superfamily_Immunoglobulin	HMMSmart_SM00409,HMMPfam_ig,superfamily_Immunoglobulin	-	no_errors	Unknown	Unknown	Unknown	88	0	0	41	34	45.33	Somatic	1	30.9259	0	0	0
1	173147015	173147015	C	A	SNP	Nr1i3	NM_009803.4	mouse	genbank	58_37k	1	provisional	silent	c.577	p.R193	-	HMMPfam_Hormone_recep,HMMSmart_HOLI,superfamily_Str_ncl_receptor	HMMPfam_Hormone_recep,HMMSmart_HOLI,HMMPfam_zf-C4,HMMSmart_ZnF_C4,PatternScan_NUCLEAR_REC_DBD_1,superfamily_Str_ncl_receptor,superfamily_SSF57716	-	no_errors	Unknown	Unknown	Unknown	12	0	0	2	10	83.33	Somatic	0.999959	10.7733	1	0	0
1	173168778	173168778	C	G	SNP	Ndufs2	NM_153064.4	mouse	genbank	58_37k	-1	provisional	intronic	c.703-55	e6-55	-	-	-	-	no_errors	Unknown	Unknown	Unknown	29	0	0	16	11	40.74	Somatic	0.999899	9.20225	0	0	0
1	173270850	173270850	G	T	SNP	Nit1	ENSMUST00000014141	mouse	ensembl	58_37k	-1	known	3_prime_untranslated_region	c.*1812	NULL	-	-	-	-	no_errors	Unknown	Unknown	Unknown	18	0	0	7	16	69.57	Somatic	0.999997	13.1087	11	1	8.33
1	173290001	173290001	G	T	SNP	Klhdc9	NM_001033039.2	mouse	genbank	58_37k	-1	provisional	silent	c.559	p.R187	-	superfamily_Gal_oxid_central	HMMPfam_Kelch_1,superfamily_Gal_oxid_central,HMMPfam_Kelch_2	-	no_errors	Unknown	Unknown	Unknown	34	0	0	24	33	57.89	Somatic	1	20.4602	0	0	0
1	173316409	173316409	G	T	SNP	Pvrl4	NM_027893.3	mouse	genbank	58_37k	1	validated	intronic	c.1302+44	e8+44	-	-	-	-	no_errors	Unknown	Unknown	Unknown	12	0	0	6	14	70	Somatic	0.999879	9.59216	0	0	0
1	173346095	173346095	G	T	SNP	Usf1	NM_009480.2	mouse	genbank	58_37k	1	provisional	intronic	c.174+134	e3+134	-	-	-	-	no_errors	Unknown	Unknown	Unknown	20	0	0	15	16	51.61	Somatic	0.999956	10.0521	0	0	0
1	173461762	173461762	A	T	SNP	Itln1	NM_010584.2	mouse	genbank	58_37k	-1	provisional	missense	c.280	p.C94S	-	HMMSmart_FBG,superfamily_Fibrinogen_a/b/g_C	HMMSmart_FBG,PatternScan_FIBRIN_AG_C_DOMAIN,superfamily_Fibrinogen_a/b/g_C	-	no_errors	Unknown	Unknown	Unknown	489	0	0	393	36	8.37	Somatic	1	23.3114	0	0	0
1	173504639	173504640	-	TCT	INS	Cd244	NM_018729.2	mouse	genbank	58_37k	1	validated	intronic	c.661+140_661+139	e3+140	-	-	-	-	no_errors	Unknown	Unknown	Unknown	12	0	0	7	6	46.15	Somatic	0.990582	4.68398	0	0	0
1	173571007	173571007	T	C	SNP	Slamf7	NM_144539.5	mouse	genbank	58_37k	-1	provisional	intronic	c.367+80	e2+80	-	-	-	-	no_errors	Unknown	Unknown	Unknown	21	0	0	10	16	61.54	Somatic	0.999996	12.6076	0	0	0
1	173997622	173997622	C	A	SNP	Ncstn	NM_021607.3	mouse	genbank	58_37k	-1	validated	missense	c.1844	p.R615M	-	NULL	HMMPfam_Nicastrin,PatternScan_WD_REPEATS_1,superfamily_Zn-dependent exopeptidases	-	no_errors	Unknown	Unknown	Unknown	8	0	0	7	7	50	Somatic	0.977529	3.97635	110	107	48.86
1	174154060	174154060	T	A	SNP	Atp1a4	ENSMUST00000007346	mouse	ensembl	58_37k	-1	known	intronic	c.3071-103	e22-103	-	-	-	-	no_errors	Unknown	Unknown	Unknown	7	0	0	5	6	54.55	Somatic	0.97068	3.8078	0	0	0
1	174210646	174210646	C	A	SNP	Atp1a2	NM_178405.3	mouse	genbank	58_37k	-1	validated	intronic	c.1964+54	e14+54	-	-	-	-	no_errors	Unknown	Unknown	Unknown	38	0	0	18	21	53.85	Somatic	1	17.8192	0	0	0
1	174299747	174299747	C	A	SNP	Kcnj10	NM_001039484.1	mouse	genbank	58_37k	1	validated	missense	c.696	p.N232K	-	HMMPfam_IRK,superfamily_E set domains	HMMPfam_IRK,superfamily_E set domains,superfamily_Voltage-gated potassium channels	-	no_errors	Unknown	Unknown	Unknown	66	0	0	33	34	50.75	Somatic	1	28.5066	0	0	0
1	174425279	174425279	C	A	SNP	Igsf9	NM_033608.3	mouse	genbank	58_37k	1	validated	missense	c.1678	p.L560M	-	HMMPfam_fn3,HMMSmart_SM00060,superfamily_Fibronectin type III	HMMSmart_SM00408,HMMSmart_SM00409,HMMPfam_fn3,HMMSmart_SM00060,superfamily_Fibronectin type III,HMMPfam_I-set,HMMPfam_V-set,HMMPfam_ig,superfamily_Immunoglobulin	-	no_errors	Unknown	Unknown	Unknown	252	0	0	100	97	49.24	Somatic	1	95.2483	0	0	0
1	174457994	174457994	G	T	SNP	Ccdc19	ENSMUST00000085894	mouse	ensembl	58_37k	1	known	missense	c.77	p.R26L	-	NULL	NULL	-	no_errors	Unknown	Unknown	Unknown	80	0	0	41	50	54.95	Somatic	1	39.898	0	0	0
1	175155363	175155363	G	T	SNP	Fcer1a	NM_010184.2	mouse	genbank	58_37k	-1	validated	intronic	c.328+68	e3+68	-	-	-	-	no_errors	Unknown	Unknown	Unknown	85	0	0	20	22	52.38	Somatic	1	28.6242	0	0	0
1	175201012	175201012	G	T	SNP	Olfr418-ps1	NM_146651.2	mouse	genbank	58_37k	1	validated	missense	c.705	p.K235N	-	HMMPfam_7tm_1,superfamily_Family A G protein-coupled receptor-like	HMMPfam_7tm_1,superfamily_Family A G protein-coupled receptor-like	-	no_errors	Unknown	Unknown	Unknown	222	0	0	145	39	21.2	Somatic	1	31.1586	0	0	0
1	176081791	176081791	C	A	SNP	Olfr421	NM_146720.2	mouse	genbank	58_37k	1	validated	missense	c.143	p.A48D	-	HMMPfam_7tm_1,superfamily_Family A G protein-coupled receptor-like	HMMPfam_7tm_1,PatternScan_G_PROTEIN_RECEP_F1_1,superfamily_Family A G protein-coupled receptor-like	-	pseudogene	Unknown	Unknown	Unknown	216	0	0	83	66	44.3	Somatic	1	68.0348	0	0	0
1	176126009	176126009	G	C	SNP	Spna1	NM_011465.4	mouse	genbank	58_37k	1	validated	missense	c.1850	p.R617P	-	HMMPfam_Spectrin,HMMSmart_SPEC,superfamily_Spectrin	HMMPfam_SH3_1,HMMSmart_SH3,superfamily_SH3,HMMPfam_Spectrin,HMMPfam_efhand_Ca_insen,HMMSmart_SPEC,superfamily_Spectrin,superfamily_SSF47473	-	no_errors	Unknown	Unknown	Unknown	18	0	0	10	5	33.33	Somatic	0.986705	4.30722	0	0	0
1	176299840	176299840	G	A	SNP	Olfr417	NM_207137.3	mouse	genbank	58_37k	1	validated	missense	c.791	p.G264E	-	HMMPfam_7tm_1,superfamily_Family A G protein-coupled receptor-like	HMMPfam_7tm_1,PatternScan_G_PROTEIN_RECEP_F1_1,superfamily_Family A G protein-coupled receptor-like	-	no_errors	Unknown	Unknown	Unknown	83	0	0	42	45	51.72	Somatic	1	37.1605	0	0	0
1	176378733	176378733	G	T	SNP	Fmn2	NM_019445.2	mouse	genbank	58_37k	1	validated	5_prime_flanking_region	c.-53444	NULL	-	-	-	-	no_errors	Unknown	Unknown	Unknown	88	0	0	63	37	37	Somatic	1	26.4579	0	0	0
1	177021298	177021298	C	A	SNP	Rgs7	NM_011880.3	mouse	genbank	58_37k	-1	validated	intronic	c.685-75	e10-75	-	-	-	-	no_errors	Unknown	Unknown	Unknown	27	0	0	10	11	52.38	Somatic	0.999984	11.0332	0	0	0
1	177818730	177818730	G	T	SNP	Exo1	NM_012012.4	mouse	genbank	58_37k	1	validated	intronic	c.406-125	e4-125	-	-	-	-	no_errors	Unknown	Unknown	Unknown	19	0	0	4	4	50	Somatic	0.996274	5.58992	1	2	66.67
1	177908841	177908841	T	A	SNP	B020018G12Rik	NM_001039518.2	mouse	genbank	58_37k	-1	validated	missense	c.200	p.Q67L	-	superfamily_RNA-binding domain RBD	HMMPfam_RRM_1,HMMSmart_SM00360,superfamily_RNA-binding domain RBD	-	no_errors	Unknown	Unknown	Unknown	129	0	0	53	53	50	Somatic	1	50.6778	0	0	0
1	177909053	177909053	G	T	SNP	B020018G12Rik	NM_001039518.2	mouse	genbank	58_37k	-1	validated	5_prime_untranslated_region	c.-13	NULL	-	-	-	-	no_errors	Unknown	Unknown	Unknown	27	0	0	12	14	53.85	Somatic	0.999996	12.3836	5	0	0
1	180007439	180007439	T	G	SNP	Gm16432	ENSMUST00000111149	mouse	ensembl	58_37k	1	known	intronic	c.430-147	e8-147	-	-	-	-	no_errors	Unknown	Unknown	Unknown	36	0	0	23	13	36.11	Somatic	0.999959	10.0931	0	0	0
1	180179637	180179637	G	T	SNP	Pppde1	NM_024282.3	mouse	genbank	58_37k	1	validated	3_prime_untranslated_region	c.*38	NULL	-	-	-	-	no_errors	Unknown	Unknown	Unknown	17	0	0	5	8	61.54	Somatic	0.999803	8.56498	135	139	50.55
1	180846569	180846569	G	T	SNP	Kif26b	ENSMUST00000027771	mouse	ensembl	58_37k	1	known	silent	c.2412	p.V804	-	NULL	HMMPfam_Kinesin,HMMSmart_SM00129,superfamily_P-loop containing nucleoside triphosphate hydrolases	-	no_errors	Unknown	Unknown	Unknown	75	0	0	26	17	39.53	Somatic	1	19.0387	1	1	50
1	181522919	181522919	G	T	SNP	Cnst	NM_146105.3	mouse	genbank	58_37k	1	provisional	silent	c.483	p.A161	-	NULL	NULL	-	no_errors	Unknown	Unknown	Unknown	24	0	0	19	10	34.48	Somatic	0.998825	6.74542	25	31	55.36
1	181615864	181615864	G	T	SNP	Sccpdh	ENSMUST00000097455	mouse	ensembl	58_37k	1	known	splice_site	c.823-1	e9-1	-	-	-	-	no_errors	Unknown	Unknown	Unknown	365	0	0	208	180	46.39	Somatic	1	142.533	160	148	47.59
1	183086134	183086134	G	T	SNP	Cnih4	NM_030131.3	mouse	genbank	58_37k	1	validated	intronic	c.251+32	e3+32	-	-	-	-	no_errors	Unknown	Unknown	Unknown	43	0	0	20	28	58.33	Somatic	1	23.1356	2	1	33.33
1	183848309	183848309	C	A	SNP	Enah	NM_010135.2	mouse	genbank	58_37k	-1	validated	intronic	c.2124+80	e10+80	-	-	-	-	no_errors	Unknown	Unknown	Unknown	39	0	0	7	13	65	Somatic	1	17.772	0	0	0
1	186669534	186669534	C	A	SNP	Mosc2	NM_133684.3	mouse	genbank	58_37k	-1	provisional	missense	c.163	p.G55C	-	HMMPfam_MOSC_N,superfamily_PK_B_barrel_like	HMMPfam_MOSC,HMMPfam_MOSC_N,superfamily_PK_B_barrel_like	-	no_errors	Unknown	Unknown	Unknown	14	0	0	8	9	52.94	Somatic	0.998798	6.78087	66	69	51.11
1	187083304	187083304	G	T	SNP	Rab3gap2	ENSMUST00000069652	mouse	ensembl	58_37k	1	known	missense	c.2104	p.A702S	-	NULL	NULL	-	no_errors	Unknown	Unknown	Unknown	32	0	0	12	25	67.57	Somatic	1	21.5423	95	125	56.82
1	187151530	187151530	C	T	SNP	Iars2	NM_198653.2	mouse	genbank	58_37k	-1	provisional	missense	c.359	p.G120D	-	PatternScan_AA_TRNA_LIGASE_I,HMMPfam_tRNA-synt_1,superfamily_SSF52374	PatternScan_AA_TRNA_LIGASE_I,HMMPfam_tRNA-synt_1,superfamily_ValRS_IleRS_edit,superfamily_tRNAsyn_1a_bind,HMMPfam_zf-FPG_IleRS,HMMPfam_Anticodon_1,superfamily_SSF52374	-	no_errors	Unknown	Unknown	Unknown	21	0	0	14	24	63.16	Somatic	0.999999	14.645	156	158	50.32
1	187151531	187151531	C	G	SNP	Iars2	NM_198653.2	mouse	genbank	58_37k	-1	provisional	missense	c.358	p.G120R	-	PatternScan_AA_TRNA_LIGASE_I,HMMPfam_tRNA-synt_1,superfamily_SSF52374	PatternScan_AA_TRNA_LIGASE_I,HMMPfam_tRNA-synt_1,superfamily_ValRS_IleRS_edit,superfamily_tRNAsyn_1a_bind,HMMPfam_zf-FPG_IleRS,HMMPfam_Anticodon_1,superfamily_SSF52374	-	no_errors	Unknown	Unknown	Unknown	22	0	0	15	24	61.54	Somatic	0.999999	14.6801	155	157	50.32
1	187180375	187180375	A	T	SNP	Bpnt1	NM_011794.3	mouse	genbank	58_37k	1	validated	missense	c.797	p.H266L	-	HMMPfam_Inositol_P,superfamily_SSF56655	HMMPfam_Inositol_P,PatternScan_IMP_2,PatternScan_IMP_1,superfamily_SSF56655	-	no_errors	Unknown	Unknown	Unknown	79	0	0	30	34	53.12	Somatic	1	33.4033	169	164	49.1
1	187235659	187235659	G	T	SNP	Eprs	NM_029735.1	mouse	genbank	58_37k	1	validated	splice_region	c.3373+5	e23+5	-	-	-	-	no_errors	Unknown	Unknown	Unknown	40	0	0	24	28	53.85	Somatic	1	20.2426	0	0	0
1	187237465	187237465	G	T	SNP	Eprs	NM_029735.1	mouse	genbank	58_37k	1	validated	intronic	c.3555+36	e25+36	-	-	-	-	no_errors	Unknown	Unknown	Unknown	82	0	0	31	36	53.73	Somatic	1	35.3082	0	0	0
1	187251841	187251841	A	C	SNP	Eprs	NM_029735.1	mouse	genbank	58_37k	1	validated	intronic	c.4389-35	e32-35	-	-	-	-	no_errors	Unknown	Unknown	Unknown	59	0	0	16	24	60	Somatic	1	27.3185	1	0	0
1	188561662	188561662	G	T	SNP	Rrp15	NM_026041.2	mouse	genbank	58_37k	-1	reviewed	intronic	c.406-98	e3-98	-	-	-	-	no_errors	Unknown	Unknown	Unknown	45	0	0	21	19	47.5	Somatic	1	17.0357	6	2	25
1	190608629	190608629	G	T	SNP	Ush2a	NM_021408.3	mouse	genbank	58_37k	1	validated	missense	c.9656	p.W3219L	-	HMMSmart_SM00060,superfamily_Fibronectin type III	HMMSmart_SM00282,HMMPfam_Laminin_EGF,HMMSmart_SM00180,PatternScan_EGF_LAM_1,HMMPfam_fn3,HMMSmart_SM00060,HMMSmart_SM00560,HMMSmart_SM00136,superfamily_Fibronectin type III,superfamily_Concanavalin A-like lectins/glucanases,HMMPfam_Laminin_G_2,PatternScan_	-	no_errors	Unknown	Unknown	Unknown	70	0	0	29	20	40.82	Somatic	1	20.0477	0	0	0
1	190688398	190688398	C	A	SNP	Ush2a	NM_021408.3	mouse	genbank	58_37k	1	validated	intronic	c.11525-70	e59-70	-	-	-	-	no_errors	Unknown	Unknown	Unknown	12	0	0	4	6	60	Somatic	0.997401	6.04024	0	0	0
1	190739951	190739951	C	G	SNP	Ush2a	NM_021408.3	mouse	genbank	58_37k	1	validated	missense	c.13873	p.L4625V	-	superfamily_Fibronectin type III	HMMSmart_SM00282,HMMPfam_Laminin_EGF,HMMSmart_SM00180,PatternScan_EGF_LAM_1,HMMPfam_fn3,HMMSmart_SM00060,HMMSmart_SM00560,HMMSmart_SM00136,superfamily_Fibronectin type III,superfamily_Concanavalin A-like lectins/glucanases,HMMPfam_Laminin_G_2,PatternScan_	-	no_errors	Unknown	Unknown	Unknown	45	0	0	14	29	67.44	Somatic	1	28.1939	0	0	0
1	191082682	191082682	C	A	SNP	Kcnk2	NM_010607.2	mouse	genbank	58_37k	-1	validated	missense	c.526	p.G176W	-	HMMPfam_Ion_trans_2,superfamily_Voltage-gated potassium channels	HMMPfam_Ion_trans_2,superfamily_Voltage-gated potassium channels	-	no_errors	Unknown	Unknown	Unknown	38	0	0	9	6	40	Somatic	0.999736	8.24089	0	0	0
1	191478744	191478745	-	C	INS	Cenpf	NM_001081363.2	mouse	genbank	58_37k	-1	validated	frame_shift_ins	c.5190_5189	p.D1730fs	-	NULL	superfamily_Prefoldin,HMMPfam_Rb-bdg_C_Cenp-F,HMMPfam_Cenp-F_N,HMMPfam_Cenp-F_leu_zip	-	no_errors	Unknown	Unknown	Unknown	78	0	0	45	39	46.43	Somatic	1	30.6192	90	17	15.89
1	191478745	191478745	T	C	SNP	Cenpf	NM_001081363.2	mouse	genbank	58_37k	-1	validated	missense	c.5189	p.D1730G	-	NULL	superfamily_Prefoldin,HMMPfam_Rb-bdg_C_Cenp-F,HMMPfam_Cenp-F_N,HMMPfam_Cenp-F_leu_zip	-	no_errors	Unknown	Unknown	Unknown	79	0	0	39	45	53.57	Somatic	1	37.2368	79	26	24.76
1	192756781	192756781	G	A	SNP	Angel2	NM_021421.3	mouse	genbank	58_37k	1	validated	missense	c.95	p.G32D	-	NULL	HMMPfam_Exo_endo_phos,superfamily_DNase I-like	-	no_errors	Unknown	Unknown	Unknown	41	0	0	20	19	48.72	Somatic	1	16.4225	41	62	60.19
1	192833402	192833402	A	T	SNP	Mfsd7b	NM_001081259.1	mouse	genbank	58_37k	-1	provisional	intronic	c.1543+26	e8+26	-	-	-	-	no_errors	Unknown	Unknown	Unknown	127	0	0	59	66	52.8	Somatic	1	57.1863	0	0	0
1	193948297	193948297	C	T	SNP	Rcor3	NM_144814.2	mouse	genbank	58_37k	-1	provisional	intronic	c.343-49	e5-49	-	-	-	-	no_errors	Unknown	Unknown	Unknown	46	0	0	22	19	46.34	Somatic	1	16.8916	0	1	100
1	194048825	194048825	A	G	SNP	Kcnh1	NM_010600.2	mouse	genbank	58_37k	1	validated	missense	c.302	p.K101R	-	HMMSmart_SM00086,HMMPfam_PAS,superfamily_PYP-like sensor domain (PAS domain)	HMMPfam_cNMP_binding,HMMSmart_SM00100,HMMSmart_SM00086,HMMPfam_Ion_trans,HMMPfam_PAS,superfamily_cAMP-binding domain-like,superfamily_PYP-like sensor domain (PAS domain),superfamily_Voltage-gated potassium channels	-	no_errors	Unknown	Unknown	Unknown	14	0	0	15	6	28.57	Somatic	0.965457	3.33068	8	7	46.67
1	195156370	195156370	C	A	SNP	Lamb3	NM_008484.2	mouse	genbank	58_37k	1	validated	silent	c.1260	p.A420	-	HMMPfam_Laminin_EGF,HMMSmart_EGF_Lam,PatternScan_EGF_LAM_1,superfamily_SSF57196	HMMPfam_Laminin_EGF,HMMSmart_EGF_Lam,PatternScan_EGF_LAM_1,HMMPfam_Laminin_N,HMMSmart_LamNT,superfamily_Gal_bind_like,PatternScan_EGF_1,PatternScan_EGF_2,superfamily_SSF57196	-	no_errors	Unknown	Unknown	Unknown	73	0	0	30	23	43.4	Somatic	1	22.8712	2	1	33.33
1	196469983	196469983	C	T	SNP	Plxna2	NM_008882.2	mouse	genbank	58_37k	1	validated	silent	c.30	p.A10	-	NULL	HMMPfam_Sema,HMMSmart_Sema,superfamily_Sema,HMMPfam_PSI,HMMPfam_TIG,HMMSmart_IPT,HMMSmart_PSI,superfamily_Rho_GAP,HMMPfam_Plexin_cytopl,superfamily_Ig_E-set,superfamily_Plexin-like_fold	-	no_errors	Unknown	Unknown	Unknown	32	0	0	13	17	56.67	Somatic	1	15.5693	52	34	39.53
2	3259914	3259914	G	A	SNP	Olah	NM_145921.1	mouse	genbank	58_37k	-1	validated	intronic	c.656-90	e7-90	-	-	-	-	no_errors	Unknown	Unknown	Unknown	25	0	0	14	10	41.67	Somatic	0.999737	8.24254	0	0	0
2	3353604	3353604	G	C	SNP	Dclre1c	NM_146114.3	mouse	genbank	58_37k	1	validated	intronic	c.307-106	e5-106	-	-	-	-	no_errors	Unknown	Unknown	Unknown	4	0	0	3	6	66.67	Somatic	0.926168	3.20358	2	3	60
2	3355422	3355422	C	A	SNP	Dclre1c	NM_146114.3	mouse	genbank	58_37k	1	validated	intronic	c.678+58	e8+58	-	-	-	-	no_errors	Unknown	Unknown	Unknown	22	0	0	11	12	52.17	Somatic	0.999952	9.95444	0	0	0
2	4812514	4812514	G	T	SNP	Sephs1	NM_175400.6	mouse	genbank	58_37k	1	validated	intronic	c.298-119	e3-119	-	-	-	-	no_errors	Unknown	Unknown	Unknown	10	0	0	3	7	70	Somatic	0.998345	6.73979	2	1	33.33
2	4857136	4857136	G	T	SNP	Phyh	NM_010726.2	mouse	genbank	58_37k	1	validated	missense	c.800	p.G267V	-	HMMPfam_PhyH	HMMPfam_PhyH	-	no_errors	Unknown	Unknown	Unknown	22	0	0	10	14	58.33	Somatic	0.999992	11.7454	44	54	55.1
2	5831342	5831342	A	G	SNP	Dhtkd1	NM_001081131.2	mouse	genbank	58_37k	-1	provisional	splice_region	c.2157+6	e12+6	-	-	-	-	no_errors	Unknown	Unknown	Unknown	32	0	0	19	22	53.66	Somatic	1	16.0467	0	0	0
2	6022262	6022262	G	T	SNP	5430407P10Rik	NM_144883.4	mouse	genbank	58_37k	-1	validated	missense	c.536	p.P179Q	-	NULL	NULL	-	no_errors	Unknown	Unknown	Unknown	47	1	2.08	21	35	62.5	Somatic	1	24.9584	17	7	29.17
2	6024172	6024172	G	T	SNP	5430407P10Rik	NM_144883.4	mouse	genbank	58_37k	-1	validated	intronic	c.139-61	e2-61	-	-	-	-	no_errors	Unknown	Unknown	Unknown	13	0	0	9	20	68.97	Somatic	0.999966	10.972	0	0	0
2	6871947	6871947	C	A	SNP	ENSMUSG00000062319	ENSMUST00000076071	mouse	ensembl	58_37k	-1	known	missense	c.126	p.W42C	-	NULL	NULL	-	no_errors	Unknown	Unknown	Unknown	67	0	0	27	32	54.24	Somatic	1	30.0413	3	0	0
2	9873938	9873938	C	A	SNP	Taf3	NM_027748.3	mouse	genbank	58_37k	-1	validated	silent	c.1044	p.V348	-	NULL	HMMSmart_SM00249,HMMPfam_Bromo_TP,HMMSmart_SM00576,superfamily_Histone-fold,superfamily_FYVE/PHD zinc finger,PatternScan_ZF_PHD_1,HMMPfam_PHD	-	no_errors	Unknown	Unknown	Unknown	79	0	0	36	36	50	Somatic	1	32.2348	32	39	54.93
2	10002012	10002012	C	A	SNP	Atp5c1	NM_020615.4	mouse	genbank	58_37k	-1	validated	missense	c.19	p.V7F	-	NULL	HMMPfam_ATP-synt,PatternScan_ATPASE_GAMMA,superfamily_ATP synthase (F1-ATPase) gamma subunit	-	no_errors	Unknown	Unknown	Unknown	13	0	0	10	5	33.33	Somatic	0.969465	3.4598	359	344	48.93
2	10024364	10024364	C	T	SNP	Itih2	NM_010582.3	mouse	genbank	58_37k	-1	validated	intronic	c.1957+48	e15+48	-	-	-	-	no_errors	Unknown	Unknown	Unknown	31	0	0	16	17	51.52	Somatic	0.999999	13.8767	0	0	0
2	10038966	10038966	C	A	SNP	Itih2	NM_010582.3	mouse	genbank	58_37k	-1	validated	missense	c.738	p.K246N	-	NULL	HMMPfam_VWA,HMMSmart_VWA,HMMSmart_VIT,HMMPfam_ITI_HC_C,HMMPfam_VIT,superfamily_SSF53300	-	no_errors	Unknown	Unknown	Unknown	54	0	0	35	27	43.55	Somatic	1	19.94	19	2	9.09
2	10162055	10162055	G	A	SNP	Itih5	NM_172471.2	mouse	genbank	58_37k	1	validated	intronic	c.1419-92	e10-92	-	-	-	-	no_errors	Unknown	Unknown	Unknown	30	0	0	7	15	68.18	Somatic	1	17.1776	0	0	0
2	10315037	10315037	G	T	SNP	Sfmbt2	NM_177386.4	mouse	genbank	58_37k	1	provisional	splice_region	c.97+4	e1+4	-	-	-	-	no_errors	Unknown	Unknown	Unknown	83	0	0	56	70	55.56	Somatic	1	45.87	1	0	0
2	10469031	10469031	C	A	SNP	Sfmbt2	NM_177386.4	mouse	genbank	58_37k	1	provisional	intronic	c.1439-27	e12-27	-	-	-	-	no_errors	Unknown	Unknown	Unknown	176	0	0	88	65	42.48	Somatic	1	57.4322	0	0	0
2	11405754	11405754	C	A	SNP	Pfkfb3	NM_133232.3	mouse	genbank	58_37k	-1	validated	intronic	c.978+78	e9+78	-	-	-	-	no_errors	Unknown	Unknown	Unknown	40	0	0	24	19	44.19	Somatic	1	14.7349	0	3	100
2	11451833	11451833	G	T	SNP	ENSMUSG00000075530	ENSMUST00000100409	mouse	ensembl	58_37k	1	known	missense	c.178	p.G60C	-	NULL	NULL	-	no_errors	Unknown	Unknown	Unknown	22	0	0	23	15	39.47	Somatic	0.999674	8.02785	0	0	0
2	11595951	11595951	C	A	SNP	Il2ra	NM_008367.3	mouse	genbank	58_37k	1	validated	missense	c.94	p.P32T	-	HMMSmart_SM00032,superfamily_Complement control module/SCR domain	HMMPfam_Sushi,HMMSmart_SM00032,superfamily_Complement control module/SCR domain	-	no_errors	Unknown	Unknown	Unknown	92	0	0	46	50	52.08	Somatic	1	41.5055	0	0	0
2	11665223	11665223	T	C	SNP	Fbxo18	NM_015792.1	mouse	genbank	58_37k	-1	provisional	intronic	c.2958+30	e20+30	-	-	-	-	no_errors	Unknown	Unknown	Unknown	41	0	0	19	18	48.65	Somatic	1	16.0909	1	0	0
2	11669982	11669982	T	A	SNP	Fbxo18	ENSMUST00000123717	mouse	ensembl	58_37k	-1	known	5_prime_untranslated_region	c.-11669982	NULL	-	-	-	-	no_coding_region	Unknown	Unknown	Unknown	27	0	0	8	11	57.89	Somatic	0.999994	12.1002	1	1	50
2	11669996	11669996	C	A	SNP	Fbxo18	NM_015792.1	mouse	genbank	58_37k	-1	provisional	missense	c.2714	p.R905I	-	superfamily_P-loop containing nucleoside triphosphate hydrolases	HMMPfam_F-box,HMMSmart_SM00256,superfamily_P-loop containing nucleoside triphosphate hydrolases,superfamily_F-box domain	-	no_errors	Unknown	Unknown	Unknown	26	0	0	12	11	47.83	Somatic	0.99995	9.91212	151	155	50.49
2	11699085	11699085	C	A	SNP	Fbxo18	ENSMUST00000102966	mouse	ensembl	58_37k	-1	known	missense	c.74	p.R25L	-	NULL	HMMPfam_F-box,HMMSmart_SM00256,superfamily_P-loop containing nucleoside triphosphate hydrolases,superfamily_F-box domain	-	no_errors	Unknown	Unknown	Unknown	39	0	0	18	15	45.45	Somatic	0.999999	13.716	80	74	48.05
2	12111090	12111090	C	A	SNP	Itga8	NM_001001309.	mouse	genbank	58_37k	-1	validated	splice_region	c.2115+10	e20+10	-	-	-	-	no_errors	Unknown	Unknown	Unknown	48	0	0	23	21	46.67	Somatic	1	18.4839	0	0	0
2	12331678	12331678	C	G	SNP	Fam188a	NM_024185.4	mouse	genbank	58_37k	-1	validated	missense	c.124	p.A42P	-	NULL	PatternScan_G_PROTEIN_RECEP_F1_1,superfamily_EF-hand	-	no_errors	Unknown	Unknown	Unknown	52	0	0	19	23	53.49	Somatic	1	22.859	42	64	59.81
2	13235634	13235634	C	G	SNP	Cubn	NM_001081084.2	mouse	genbank	58_37k	-1	validated	silent	c.8880	p.L2960	-	HMMPfam_CUB,HMMSmart_CUB,superfamily_CUB	PatternScan_ASX_HYDROXYL,HMMPfam_CUB,HMMSmart_CUB,superfamily_CUB,PatternScan_AA_TRNA_LIGASE_I,HMMSmart_EGF_CA,HMMPfam_EGF,HMMSmart_EGF,PatternScan_EGF_1,PatternScan_EGF_2,HMMPfam_EGF_CA,PatternScan_EGF_CA,superfamily_SSF57196	-	no_errors	Unknown	Unknown	Unknown	23	0	0	14	15	51.72	Somatic	0.999982	10.9248	5	2	28.57
2	13411085	13411085	G	T	SNP	Cubn	NM_001081084.2	mouse	genbank	58_37k	-1	validated	intronic	c.340-101	e4-101	-	-	-	-	no_errors	Unknown	Unknown	Unknown	17	0	0	11	13	54.17	Somatic	0.999854	8.88743	0	0	0
2	13441447	13441447	G	A	SNP	Trdmt1	NM_010067.4	mouse	genbank	58_37k	-1	validated	nonsense	c.823	p.R275*	-	superfamily_S-adenosyl-L-methionine-dependent methyltransferases	HMMPfam_DNA_methylase,PatternScan_C5_MTASE_2,superfamily_S-adenosyl-L-methionine-dependent methyltransferases	-	no_errors	Unknown	Unknown	Unknown	53	0	0	26	33	55.93	Somatic	1	26.8886	33	3	8.33
2	13496094	13496094	C	A	SNP	Vim	NM_011701.4	mouse	genbank	58_37k	1	provisional	silent	c.36	p.R12	-	HMMPfam_Filament_head	HMMPfam_Filament_head,HMMPfam_Filament,PatternScan_IF	-	no_errors	Unknown	Unknown	Unknown	47	0	0	31	21	40.38	Somatic	1	15.6101	4280	3910	47.66
2	14238408	14238408	G	T	SNP	Mrc1	NM_008625.2	mouse	genbank	58_37k	1	validated	intronic	c.3145-61	e23-61	-	-	-	-	no_errors	Unknown	Unknown	Unknown	30	0	0	5	11	68.75	Somatic	1	15.0646	0	0	0
2	14317973	14317973	G	T	SNP	Slc39a12	NM_001012305.2	mouse	genbank	58_37k	1	validated	missense	c.533	p.S178I	-	NULL	HMMPfam_Zip	-	no_errors	Unknown	Unknown	Unknown	13	0	0	9	5	35.71	Somatic	0.975376	3.68223	0	0	0
2	14355983	14355984	-	T	INS	Slc39a12	NM_001012305.2	mouse	genbank	58_37k	1	validated	splice_site_ins	c.1419+1_1419+1	e7+1	-	-	-	-	no_errors	Unknown	Unknown	Unknown	70	0	0	41	17	29.31	Somatic	0.999999	14.3493	0	0	0
2	14355987	14355987	G	A	SNP	Slc39a12	NM_001012305.2	mouse	genbank	58_37k	1	validated	splice_region	c.1419+5	e7+5	-	-	-	-	no_errors	Unknown	Unknown	Unknown	66	0	0	35	19	34.55	Somatic	1	16.7406	0	0	0
2	14951524	14951524	C	A	SNP	Nsun6	NM_028950.4	mouse	genbank	58_37k	-1	validated	intronic	c.777+132	e7+132	-	-	-	-	no_errors	Unknown	Unknown	Unknown	30	0	0	12	10	45.45	Somatic	0.999954	9.99699	0	0	0
2	14977092	14977092	C	A	SNP	Arl5b	NM_029466.4	mouse	genbank	58_37k	1	provisional	5_prime_untranslated_region	c.-61	NULL	-	-	-	-	no_errors	Unknown	Unknown	Unknown	70	0	0	24	26	52	Somatic	1	27.3979	8	13	59.09
2	14977093	14977093	G	T	SNP	Arl5b	NM_029466.4	mouse	genbank	58_37k	1	provisional	5_prime_untranslated_region	c.-60	NULL	-	-	-	-	no_errors	Unknown	Unknown	Unknown	70	0	0	25	27	51.92	Somatic	1	27.776	8	13	61.9
2	17296947	17296947	C	T	SNP	Nebl	ENSMUST00000124270	mouse	ensembl	58_37k	-1	known	missense	c.2242	p.V748M	-	HMMPfam_Nebulin,HMMSmart_NEBU	HMMPfam_Nebulin,HMMSmart_NEBU,HMMPfam_SH3_1,HMMSmart_SH3,superfamily_SH3	-	no_errors	Unknown	Unknown	Unknown	17	0	0	11	8	42.11	Somatic	0.997437	5.96661	0	0	0
2	19210509	19210509	G	T	SNP	Armc3	NM_001081083.1	mouse	genbank	58_37k	1	provisional	nonsense	c.1483	p.E495*	-	HMMPfam_Arm,HMMSmart_SM00185,superfamily_ARM repeat	HMMPfam_Arm,HMMSmart_SM00185,superfamily_ARM repeat	-	no_errors	Unknown	Unknown	Unknown	41	0	0	16	9	36	Somatic	0.999928	9.54075	0	0	0
2	19217033	19217033	A	G	SNP	Armc3	NM_001081083.1	mouse	genbank	58_37k	1	provisional	silent	c.1749	p.K583	-	NULL	HMMPfam_Arm,HMMSmart_SM00185,superfamily_ARM repeat	-	no_errors	Unknown	Unknown	Unknown	131	0	0	102	17	14.29	Somatic	0.999994	11.9882	0	0	0
2	19581283	19581283	G	T	SNP	Otud1	ENSMUST00000052168	mouse	ensembl	58_37k	1	known	3_prime_untranslated_region	c.*230	NULL	-	-	-	-	no_errors	Unknown	Unknown	Unknown	131	0	0	38	47	55.29	Somatic	1	53.3936	44	41	48.24
2	19581395	19581395	G	T	SNP	Otud1	ENSMUST00000052168	mouse	ensembl	58_37k	1	known	3_prime_untranslated_region	c.*342	NULL	-	-	-	-	no_errors	Unknown	Unknown	Unknown	142	0	0	42	35	45.45	Somatic	1	41.7405	36	39	51.32
2	21102854	21102854	G	T	SNP	Enkur	NM_027728.2	mouse	genbank	58_37k	-1	validated	intronic	c.595-109	e5-109	-	-	-	-	no_errors	Unknown	Unknown	Unknown	22	0	0	9	8	47.06	Somatic	0.999596	7.81459	0	0	0
2	21747942	21747942	A	C	SNP	Gpr158	NM_001004761.1	mouse	genbank	58_37k	1	validated	missense	c.2225	p.K742T	-	NULL	HMMPfam_7tm_3	-	no_errors	Unknown	Unknown	Unknown	28	0	0	14	10	41.67	Somatic	0.99986	8.87465	0	0	0
2	22344801	22344801	C	A	SNP	Myo3a	ENSMUST00000044749	mouse	ensembl	58_37k	1	known	intronic	c.2260-54	e19-54	-	-	-	-	no_errors	Unknown	Unknown	Unknown	20	0	0	15	15	50	Somatic	0.999927	9.54779	0	0	0
2	22457912	22457912	C	G	SNP	Myo3a	ENSMUST00000044749	mouse	ensembl	58_37k	1	known	intronic	c.4721+130	e32+130	-	-	-	-	no_errors	Unknown	Unknown	Unknown	10	0	0	5	11	68.75	Somatic	0.999195	7.67502	0	0	0
2	22762445	22762445	G	T	SNP	Pdss1	NM_019501.3	mouse	genbank	58_37k	1	validated	missense	c.449	p.R150L	-	HMMPfam_polyprenyl_synt,superfamily_Terpenoid synthases	HMMPfam_polyprenyl_synt,PatternScan_POLYPRENYL_SYNTHET_2,PatternScan_POLYPRENYL_SYNTHET_1,superfamily_Terpenoid synthases	-	no_errors	Unknown	Unknown	Unknown	45	0	0	25	28	52.83	Somatic	1	21.5263	77	16	17.2
2	22966157	22966157	T	G	SNP	Acbd5	NM_028793.3	mouse	genbank	58_37k	1	validated	intronic	c.1300-17	e11-17	-	-	-	-	no_errors	Unknown	Unknown	Unknown	61	0	0	55	7	11.29	Somatic	0.987735	4.39014	2	0	0
2	23063402	23063402	G	T	SNP	4931423N10Rik	ENSMUST00000028113	mouse	ensembl	58_37k	1	known	missense	c.71	p.C24F	-	NULL	HMMPfam_Ank,HMMSmart_ANK,superfamily_ANK	-	no_errors	Unknown	Unknown	Unknown	38	0	0	13	13	50	Somatic	0.999999	13.8973	0	0	0
2	23949283	23949283	C	A	SNP	Tbpl2	NM_199059.1	mouse	genbank	58_37k	-1	provisional	intronic	c.618+43	e3+43	-	-	-	-	no_errors	Unknown	Unknown	Unknown	124	0	0	32	31	49.21	Somatic	1	39.0796	0	0	0
2	23949317	23949317	G	T	SNP	Tbpl2	NM_199059.1	mouse	genbank	58_37k	-1	provisional	splice_region	c.618+9	e3+9	-	-	-	-	no_errors	Unknown	Unknown	Unknown	173	0	0	52	54	50.47	Somatic	1	61.8869	0	0	0
2	24260701	24260701	G	C	SNP	Psd4	NM_177611.3	mouse	genbank	58_37k	1	provisional	intronic	c.2472-126	e14-126	-	-	-	-	no_errors	Unknown	Unknown	Unknown	22	0	0	18	8	30.77	Somatic	0.99531	5.35754	0	0	0
2	24285188	24285188	G	T	SNP	Pax8	NM_011040.3	mouse	genbank	58_37k	-1	provisional	intronic	c.1109-40	e9-40	-	-	-	-	no_errors	Unknown	Unknown	Unknown	62	0	0	23	30	56.6	Somatic	1	29.1096	0	0	0
2	24291423	24291423	G	A	SNP	Pax8	NM_011040.3	mouse	genbank	58_37k	-1	provisional	missense	c.968	p.S323F	-	NULL	HMMPfam_PAX,HMMSmart_PAX,PatternScan_PAIRED_1,superfamily_Homeodomain_like	-	no_errors	Unknown	Unknown	Unknown	52	0	0	29	16	35.56	Somatic	0.999999	13.6257	0	0	0
2	24330607	24330607	T	G	SNP	Pax8	NM_011040.3	mouse	genbank	58_37k	-1	provisional	missense	c.11	p.N4T	-	NULL	HMMPfam_PAX,HMMSmart_PAX,PatternScan_PAIRED_1,superfamily_Homeodomain_like	-	no_errors	Unknown	Unknown	Unknown	242	0	0	116	64	35.56	Somatic	1	60.0135	0	0	0
2	24680399	24680399	T	A	SNP	Ehmt1	NM_001012518.2	mouse	genbank	58_37k	-1	validated	intronic	c.2478+66	e15+66	-	-	-	-	no_errors	Unknown	Unknown	Unknown	29	0	0	20	13	39.39	Somatic	0.999919	9.42157	0	0	0
2	24693148	24693148	C	A	SNP	Ehmt1	NM_001012518.2	mouse	genbank	58_37k	-1	validated	missense	c.2196	p.Q732H	-	superfamily_Ankyrin repeat	HMMPfam_SET,HMMSmart_SM00317,HMMPfam_Ank,HMMSmart_SM00248,superfamily_Ankyrin repeat,HMMSmart_SM00468,HMMPfam_Pre-SET,superfamily_SET domain	-	no_errors	Unknown	Unknown	Unknown	27	0	0	15	20	57.14	Somatic	1	14.8124	60	46	43.4
2	24907269	24907269	G	T	SNP	Pnpla7	NM_146251.4	mouse	genbank	58_37k	1	validated	missense	c.3405	p.K1135N	-	superfamily_Acyl_Trfase/lysoPlipase	HMMPfam_cNMP_binding,HMMSmart_cNMP,HMMPfam_Patatin,superfamily_Acyl_Trfase/lysoPlipase,superfamily_cNMP_binding	-	no_errors	Unknown	Unknown	Unknown	41	0	0	16	20	55.56	Somatic	1	18.9618	18	5	21.74
2	24907869	24907869	G	T	SNP	Pnpla7	NM_146251.4	mouse	genbank	58_37k	1	validated	missense	c.3600	p.W1200C	-	superfamily_Acyl_Trfase/lysoPlipase	HMMPfam_cNMP_binding,HMMSmart_cNMP,HMMPfam_Patatin,superfamily_Acyl_Trfase/lysoPlipase,superfamily_cNMP_binding	-	no_errors	Unknown	Unknown	Unknown	69	0	0	52	38	42.22	Somatic	1	25.4534	6	7	53.85
2	25088352	25088352	T	A	SNP	Slc34a3	NM_080854.2	mouse	genbank	58_37k	-1	validated	intronic	c.172+136	e2+136	-	-	-	-	no_errors	Unknown	Unknown	Unknown	19	0	0	8	18	69.23	Somatic	0.999999	14.0463	0	0	0
2	25110974	25110974	G	T	SNP	Tmem203	NM_177344.3	mouse	genbank	58_37k	1	validated	5_prime_untranslated_region	c.-216	NULL	-	-	-	-	no_errors	Unknown	Unknown	Unknown	21	0	0	8	9	52.94	Somatic	0.999854	8.83654	0	0	0
2	25128258	25128258	G	T	SNP	Anapc2	NM_175300.4	mouse	genbank	58_37k	1	reviewed	intronic	c.162+61	e1+61	-	-	-	-	no_errors	Unknown	Unknown	Unknown	47	0	0	32	25	43.86	Somatic	1	17.8075	0	0	0
2	25140520	25140520	G	C	SNP	Anapc2	NM_175300.4	mouse	genbank	58_37k	1	reviewed	missense	c.2129	p.R710P	-	HMMPfam_Cullin,superfamily_Cullin_homology	HMMPfam_Cullin,HMMPfam_APC2,HMMSmart_CULLIN,superfamily_Cullin_homology,superfamily_SSF46785	-	no_errors	Unknown	Unknown	Unknown	30	0	0	17	19	52.78	Somatic	0.999999	14.4167	92	93	50.27
2	25151172	25151172	C	A	SNP	Grin1	NM_008169.2	mouse	genbank	58_37k	-1	validated	intronic	c.2589+140	e18+140	-	-	-	-	no_errors	Unknown	Unknown	Unknown	9	0	0	6	6	50	Somatic	0.982495	4.15544	0	0	0
2	25165808	25165808	C	A	SNP	Grin1	NM_008169.2	mouse	genbank	58_37k	-1	validated	intronic	c.671+87	e4+87	-	-	-	-	no_errors	Unknown	Unknown	Unknown	33	0	0	11	13	54.17	Somatic	0.999999	13.7215	0	0	0
2	25229138	25229138	C	G	SNP	2010317E24Rik	NM_001081085.1	mouse	genbank	58_37k	1	provisional	intronic	c.670+101	e2+101	-	-	-	-	no_errors	Unknown	Unknown	Unknown	7	0	0	4	4	50	Somatic	0.948589	3.0832	5	4	44.44
2	25298682	25298682	C	A	SNP	Abca2	NM_007379.2	mouse	genbank	58_37k	1	validated	splice_region	c.4864+8	e29+8	-	-	-	-	no_errors	Unknown	Unknown	Unknown	32	0	0	19	20	51.28	Somatic	1	14.871	0	0	0
2	25316372	25316372	G	T	SNP	BC029214	NM_153557.1	mouse	genbank	58_37k	-1	predicted	silent	c.60	p.P20	-	NULL	NULL	-	no_errors	Unknown	Unknown	Unknown	57	0	0	22	30	57.69	Somatic	1	28.1359	10	19	65.52
2	25323702	25323702	C	A	SNP	Ptgds	NM_008963.2	mouse	genbank	58_37k	-1	validated	missense	c.338	p.G113V	-	HMMPfam_Lipocalin,superfamily_Lipocalins	HMMPfam_Lipocalin,PatternScan_LIPOCALIN,superfamily_Lipocalins	-	no_errors	Unknown	Unknown	Unknown	26	0	0	12	15	55.56	Somatic	0.999997	12.7672	0	1	100
2	25348135	25348135	G	T	SNP	Lcn12	NM_029958.1	mouse	genbank	58_37k	-1	provisional	intronic	c.252-108	e3-108	-	-	-	-	no_errors	Unknown	Unknown	Unknown	28	0	0	13	14	51.85	Somatic	0.999995	12.2222	0	0	0
2	25432795	25432795	G	T	SNP	Gm996	NM_001005424.2	mouse	genbank	58_37k	-1	validated	missense	c.2524	p.P842T	-	NULL	NULL	-	no_errors	Unknown	Unknown	Unknown	38	0	0	28	20	41.67	Somatic	0.999999	13.6588	0	0	0
2	25432916	25432916	C	T	SNP	Gm996	NM_001005424.2	mouse	genbank	58_37k	-1	validated	silent	c.2403	p.A801	-	NULL	NULL	-	no_errors	Unknown	Unknown	Unknown	12	0	0	4	6	60	Somatic	0.997401	6.04024	0	1	100
2	25516437	25516437	G	T	SNP	Lcn5	NM_007947.2	mouse	genbank	58_37k	1	validated	silent	c.462	p.G154	-	HMMPfam_Lipocalin,superfamily_Lipocalins	HMMPfam_Lipocalin,PatternScan_LIPOCALIN,superfamily_Lipocalins	-	no_errors	Unknown	Unknown	Unknown	45	0	0	32	22	40.74	Somatic	1	15.49	0	0	0
2	25679090	25679090	C	A	SNP	Lcn9	NM_029959.2	mouse	genbank	58_37k	1	provisional	missense	c.107	p.T36N	-	HMMPfam_Lipocalin,superfamily_Lipocalins	HMMPfam_Lipocalin,superfamily_Lipocalins	-	no_errors	Unknown	Unknown	Unknown	20	0	0	5	7	58.33	Somatic	0.999787	8.45896	0	0	0
2	25737761	25737761	A	C	SNP	Kcnt1	NM_175462.3	mouse	genbank	58_37k	1	provisional	splice_region	c.197+4	e2+4	-	-	-	-	no_errors	Unknown	Unknown	Unknown	15	0	0	7	4	36.36	Somatic	0.978113	3.80134	0	0	0
2	25744310	25744310	C	A	SNP	Kcnt1	NM_175462.3	mouse	genbank	58_37k	1	provisional	silent	c.309	p.L103	-	NULL	HMMPfam_BK_channel_a,HMMPfam_Ion_trans_2,superfamily_NAD(P)-bd,superfamily_SSF81324	-	no_errors	Unknown	Unknown	Unknown	92	0	0	67	56	45.53	Somatic	1	37.6225	0	0	0
2	25822522	25822522	G	A	SNP	Camsap1	ENSMUST00000091268	mouse	ensembl	58_37k	-1	known	intronic	c.158-54	e2-54	-	-	-	-	no_errors	Unknown	Unknown	Unknown	17	0	0	4	6	60	Somatic	0.999382	7.40109	0	0	0
2	25864425	25864425	C	A	SNP	Ubac1	NM_133835.2	mouse	genbank	58_37k	-1	validated	missense	c.609	p.M203I	-	HMMPfam_UBA,superfamily_UBA-like,HMMSmart_SM00165	HMMPfam_UBA,HMMSmart_SM00727,superfamily_UBA-like,HMMSmart_SM00165,superfamily_Ubiquitin-like	-	no_errors	Unknown	Unknown	Unknown	16	0	0	7	12	63.16	Somatic	0.999937	9.83704	134	166	55.33
2	26136515	26136515	C	T	SNP	4932418E24Rik	NM_177841.3	mouse	genbank	58_37k	-1	predicted	silent	c.1470	p.R490	-	NULL	NULL	-	no_errors	Unknown	Unknown	Unknown	41	1	2.38	16	12	42.86	Somatic	0.999922	9.45774	0	0	0
2	26179983	26179983	G	T	SNP	Gpsm1	NM_153410.4	mouse	genbank	58_37k	1	provisional	missense	c.620	p.R207M	-	HMMPfam_TPR_1,HMMSmart_SM00028,superfamily_TPR-like	HMMPfam_TPR_1,HMMPfam_GoLoco,HMMSmart_SM00390,HMMPfam_TPR_2,HMMSmart_SM00028,superfamily_TPR-like	-	no_errors	Unknown	Unknown	Unknown	19	0	0	10	7	41.18	Somatic	0.997587	6.02537	18	18	50
2	26221360	26221360	C	A	SNP	Snapc4	NM_172339.4	mouse	genbank	58_37k	-1	validated	missense	c.2647	p.A883S	-	NULL	HMMSmart_SANT,superfamily_Homeodomain_like,HMMPfam_Myb_DNA-binding	-	no_errors	Unknown	Unknown	Unknown	43	0	0	12	17	58.62	Somatic	1	19.2518	16	34	68
2	26228288	26228288	C	A	SNP	Snapc4	NM_172339.4	mouse	genbank	58_37k	-1	validated	nonsense	c.1288	p.E430*	-	HMMSmart_SANT,superfamily_Homeodomain_like,HMMPfam_Myb_DNA-binding	HMMSmart_SANT,superfamily_Homeodomain_like,HMMPfam_Myb_DNA-binding	-	no_errors	Unknown	Unknown	Unknown	120	0	0	52	72	58.06	Somatic	1	62.4837	40	11	21.57
2	26244805	26244805	G	T	SNP	Sdccag3	ENSMUST00000114102	mouse	ensembl	58_37k	-1	known	5_prime_untranslated_region	c.-67	NULL	-	-	-	-	no_errors	Unknown	Unknown	Unknown	10	0	0	2	11	84.62	Somatic	0.999904	10.2389	5	6	54.55
2	26257303	26257303	C	T	SNP	Inpp5e	ENSMUST00000116559	mouse	ensembl	58_37k	-1	known	5_prime_untranslated_region	c.-855	NULL	-	-	-	-	no_errors	Unknown	Unknown	Unknown	34	0	0	15	19	55.88	Somatic	1	16.6101	4	2	33.33
2	26257672	26257672	G	A	SNP	Inpp5e	ENSMUST00000144011	mouse	ensembl	58_37k	-1	known	nonsense	c.55	p.Q19*	-	superfamily_DNase I-like	HMMPfam_Exo_endo_phos,superfamily_DNase I-like	-	pseudogene:no_stop_codon	Unknown	Unknown	Unknown	63	0	0	30	26	46.43	Somatic	1	23.167	27	7	20.59
2	26329162	26329162	C	A	SNP	Notch1	NM_008714.3	mouse	genbank	58_37k	-1	validated	intronic	c.2740+39	e17+39	-	-	-	-	no_errors	Unknown	Unknown	Unknown	22	0	0	7	9	56.25	Somatic	0.999933	9.61554	2	0	0
2	26364981	26364981	T	A	SNP	Notch1	ENSMUST00000114062	mouse	ensembl	58_37k	-1	known	intronic	c.46+151	e1+151	-	-	-	-	no_stop_codon	Unknown	Unknown	Unknown	20	0	0	12	9	42.86	Somatic	0.99912	7.03581	0	0	0
2	26796576	26796576	G	A	SNP	Gm711	NM_198628.2	mouse	genbank	58_37k	1	validated	missense	c.244	p.G82R	-	superfamily_Kinase_like,superfamily_ARM-type_fold,HMMPfam_Pkinase	superfamily_Kinase_like,superfamily_ARM-type_fold,PatternScan_PROTEIN_KINASE_ATP,HMMPfam_Pkinase	-	no_errors	Unknown	Unknown	Unknown	55	0	0	36	23	38.33	Somatic	1	17.3176	0	0	0
2	26839547	26839547	G	A	SNP	Adamts13	NM_001001322.	mouse	genbank	58_37k	1	validated	intronic	c.1259+28	e10+28	-	-	-	-	no_errors	Unknown	Unknown	Unknown	25	0	0	5	19	79.17	Somatic	1	20.1859	0	0	0
2	26846824	26846824	C	A	SNP	Adamts13	NM_001001322.	mouse	genbank	58_37k	1	validated	silent	c.2292	p.G764	-	HMMPfam_TSP_1,HMMSmart_SM00209,superfamily_TSP-1 type 1 repeat	HMMPfam_CUB,superfamily_Spermadhesin CUB domain,HMMPfam_TSP_1,HMMSmart_SM00209,superfamily_TSP-1 type 1 repeat,HMMPfam_Peptidase_M10,HMMSmart_SM00608,superfamily_Metalloproteases ("zincins") catalytic domain	-	no_errors	Unknown	Unknown	Unknown	24	0	0	19	10	34.48	Somatic	0.998825	6.74542	0	0	0
2	26862182	26862182	G	A	SNP	Adamts13	NM_001001322.	mouse	genbank	58_37k	1	validated	silent	c.3768	p.K1256	-	HMMPfam_CUB,superfamily_Spermadhesin CUB domain	HMMPfam_CUB,superfamily_Spermadhesin CUB domain,HMMPfam_TSP_1,HMMSmart_SM00209,superfamily_TSP-1 type 1 repeat,HMMPfam_Peptidase_M10,HMMSmart_SM00608,superfamily_Metalloproteases ("zincins") catalytic domain	-	no_errors	Unknown	Unknown	Unknown	31	0	0	14	20	58.82	Somatic	1	16.7743	0	0	0
2	26874023	26874023	G	T	SNP	5930434B04Rik	NM_029862.3	mouse	genbank	58_37k	1	provisional	intronic	c.425+23	e4+23	-	-	-	-	no_errors	Unknown	Unknown	Unknown	32	0	0	15	28	65.12	Somatic	1	21.4222	0	1	100
2	26881430	26881430	G	A	SNP	Slc2a6	NM_172659.2	mouse	genbank	58_37k	-1	validated	silent	c.450	p.A150	-	HMMPfam_Sugar_tr,PatternScan_SUGAR_TRANSPORT_2,superfamily_MFS_gen_substrate_transporter	HMMPfam_Sugar_tr,PatternScan_SUGAR_TRANSPORT_1,PatternScan_SUGAR_TRANSPORT_2,superfamily_MFS_gen_substrate_transporter	-	no_errors	Unknown	Unknown	Unknown	26	0	0	21	8	27.59	Somatic	0.9958	5.46847	2	1	33.33
2	26939617	26939617	G	A	SNP	Adamtsl2	NM_029981.1	mouse	genbank	58_37k	1	provisional	silent	c.411	p.P137	-	NULL	HMMPfam_TSP_1,HMMSmart_SM00209,superfamily_TSP-1 type 1 repeat,HMMPfam_ADAM_spacer1,HMMPfam_PLAC	-	no_errors	Unknown	Unknown	Unknown	52	0	0	14	30	68.18	Somatic	1	31.5801	0	0	0
2	26962934	26962934	T	A	SNP	Adamtsl2	NM_029981.1	mouse	genbank	58_37k	1	provisional	missense	c.2630	p.V877E	-	HMMPfam_TSP_1,HMMSmart_SM00209,superfamily_TSP-1 type 1 repeat	HMMPfam_TSP_1,HMMSmart_SM00209,superfamily_TSP-1 type 1 repeat,HMMPfam_ADAM_spacer1,HMMPfam_PLAC	-	no_errors	Unknown	Unknown	Unknown	38	1	2.56	17	8	32	Somatic	0.995186	5.33135	1	0	0
2	27096971	27096971	C	T	SNP	Sardh	NM_138665.1	mouse	genbank	58_37k	-1	provisional	missense	c.628	p.G210S	-	HMMPfam_DAO,superfamily_FAD/NAD(P)-binding domain	HMMPfam_DAO,HMMPfam_GCV_T,HMMPfam_GCV_T_C,superfamily_Aminomethyltransferase beta-barrel domain,superfamily_Aminomethyltransferase folate-binding domain,superfamily_FAD/NAD(P)-binding domain,superfamily_FAD-linked reductases C-terminal domain	-	no_errors	Unknown	Unknown	Unknown	34	0	0	32	7	17.95	Somatic	0.987497	4.36926	2	1	33.33
2	27138770	27138770	C	A	SNP	Vav2	NM_009500.1	mouse	genbank	58_37k	-1	provisional	intronic	c.1502+59	e15+59	-	-	-	-	no_errors	Unknown	Unknown	Unknown	52	0	0	20	18	47.37	Somatic	1	18.2267	0	0	0
2	27146769	27146769	C	A	SNP	Vav2	NM_009500.1	mouse	genbank	58_37k	-1	provisional	intronic	c.1086+101	e11+101	-	-	-	-	no_errors	Unknown	Unknown	Unknown	20	0	0	13	14	51.85	Somatic	0.999939	9.72793	0	0	0
2	27390391	27390391	G	C	SNP	Wdr5	NM_080848.2	mouse	genbank	58_37k	1	validated	3_prime_untranslated_region	c.*14	NULL	-	-	-	-	no_errors	Unknown	Unknown	Unknown	29	0	0	22	20	47.62	Somatic	0.999997	12.8565	253	243	48.99
2	27607784	27607784	G	T	SNP	Rxra	NM_011305.3	mouse	genbank	58_37k	1	validated	intronic	c.796-48	e6-48	-	-	-	-	no_errors	Unknown	Unknown	Unknown	31	0	0	17	15	46.88	Somatic	0.999995	12.1494	0	2	100
2	27857144	27857144	G	T	SNP	Col5a1	NM_015734.2	mouse	genbank	58_37k	1	validated	splice_site	c.3006+1	e38+1	-	-	-	-	no_errors	Unknown	Unknown	Unknown	85	0	0	39	38	49.35	Somatic	1	34.0273	1	9	90
2	27932495	27932495	C	T	SNP	Fcnb	NM_010190.1	mouse	genbank	58_37k	-1	provisional	intronic	c.698-153	e9-153	-	-	-	-	no_errors	Unknown	Unknown	Unknown	8	0	0	5	5	50	Somatic	0.97	3.62329	0	0	0
2	28309273	28309273	G	T	SNP	Gm347	NM_001005420.1	mouse	genbank	58_37k	1	predicted	missense	c.3394	p.D1132Y	-	NULL	NULL	-	no_errors	Unknown	Unknown	Unknown	50	0	0	22	20	47.62	Somatic	1	18.6029	2	5	71.43
2	28926929	28926929	G	T	SNP	Ttf1	NM_009442.2	mouse	genbank	58_37k	1	validated	intronic	c.1775+33	e4+33	-	-	-	-	no_errors	Unknown	Unknown	Unknown	36	0	0	18	18	50	Somatic	1	15.173	0	0	0
2	29666916	29666916	G	T	SNP	Slc27a4	NM_011989.4	mouse	genbank	58_37k	1	provisional	splice_site	c.1197+1	e7+1	-	-	-	-	no_errors	Unknown	Unknown	Unknown	36	0	0	27	16	37.21	Somatic	0.999984	11.0631	0	1	100
2	29806269	29806269	G	T	SNP	Gle1	NM_028923.3	mouse	genbank	58_37k	1	validated	intronic	c.1779+18	e12+18	-	-	-	-	no_errors	Unknown	Unknown	Unknown	6	0	0	2	10	83.33	Somatic	0.997758	6.89827	0	0	0
2	29860042	29860042	G	C	SNP	Spna2	NM_001076554.2	mouse	genbank	58_37k	1	validated	missense	c.3501	p.K1167N	-	HMMSmart_SM00150,superfamily_Spectrin repeat	HMMPfam_SH3_1,HMMSmart_SM00326,superfamily_SH3-domain,HMMPfam_Spectrin,HMMSmart_SM00054,HMMPfam_efhand_Ca_insen,HMMSmart_SM00150,PatternScan_EF_HAND_1,HMMPfam_efhand,superfamily_Spectrin repeat,superfamily_EF-hand	-	no_errors	Unknown	Unknown	Unknown	46	0	0	25	24	48.98	Somatic	1	19.2784	293	286	49.4
2	29934388	29934388	A	C	SNP	Pkn3	NM_153805.1	mouse	genbank	58_37k	1	provisional	intronic	c.15+78	e1+78	-	-	-	-	no_errors	Unknown	Unknown	Unknown	18	0	0	17	15	46.88	Somatic	0.999733	8.24414	6	4	40
2	30141986	30141986	G	T	SNP	Nup188	NM_198304.2	mouse	genbank	58_37k	1	provisional	missense	c.28	p.V10L	-	NULL	HMMPfam_Nup188	-	no_errors	Unknown	Unknown	Unknown	14	0	0	9	12	57.14	Somatic	0.999615	8.02016	45	32	41.03
2	30165463	30165463	G	T	SNP	Nup188	NM_198304.2	mouse	genbank	58_37k	1	provisional	missense	c.978	p.W326C	-	HMMPfam_Nup188	HMMPfam_Nup188	-	no_errors	Unknown	Unknown	Unknown	62	0	0	19	29	60.42	Somatic	1	30.606	123	170	58.02
2	30187838	30187838	G	T	SNP	Nup188	NM_198304.2	mouse	genbank	58_37k	1	provisional	intronic	c.3018-67	e28-67	-	-	-	-	no_errors	Unknown	Unknown	Unknown	49	0	0	21	31	59.62	Somatic	1	26.7103	4	3	42.86
2	30210372	30210372	C	T	SNP	Sh3glb2	NM_139302.1	mouse	genbank	58_37k	-1	provisional	splice_site	c.334+1	e3+1	-	-	-	-	no_errors	Unknown	Unknown	Unknown	25	0	0	17	9	34.62	Somatic	0.998823	6.74384	0	44	100
2	30260374	30260374	G	T	SNP	Crat	NM_007760.3	mouse	genbank	58_37k	-1	validated	intronic	c.1464+84	e11+84	-	-	-	-	no_errors	Unknown	Unknown	Unknown	24	0	0	14	13	48.15	Somatic	0.999955	10.0128	1	2	50
2	30282015	30282015	A	T	SNP	Ppp2r4	NM_138748.5	mouse	genbank	58_37k	1	validated	missense	c.128	p.Q43L	-	HMMPfam_PTPA	HMMPfam_PTPA	-	no_errors	Unknown	Unknown	Unknown	55	0	0	38	35	47.95	Somatic	1	24.0001	392	359	47.8
2	30291223	30291223	G	C	SNP	Ppp2r4	NM_138748.5	mouse	genbank	58_37k	1	validated	intronic	c.460+22	e5+22	-	-	-	-	no_errors	Unknown	Unknown	Unknown	30	0	0	24	19	44.19	Somatic	0.999994	12.0386	5	0	0
2	30872614	30872614	G	T	SNP	Usp20	NM_028846.5	mouse	genbank	58_37k	1	validated	intronic	c.1747-35	e16-35	-	-	-	-	no_errors	Unknown	Unknown	Unknown	69	0	0	36	33	47.83	Somatic	1	27.455	1	0	0
2	31033729	31033729	G	T	SNP	Gpr107	NM_178760.4	mouse	genbank	58_37k	1	validated	intronic	c.727-45	e9-45	-	-	-	-	no_errors	Unknown	Unknown	Unknown	54	0	0	25	25	50	Somatic	1	22.1583	1	0	0
2	31209693	31209693	G	T	SNP	Hmcn2	ENSMUST00000113532	mouse	ensembl	58_37k	1	known	missense	c.1969	p.V657L	-	HMMSmart_IGc2,HMMPfam_I-set,superfamily_SSF48726	PatternScan_ASX_HYDROXYL,PatternScan_ARGE_DAPE_CPG2_1,HMMSmart_EGF_CA,HMMSmart_VWA,HMMSmart_IGc2,HMMSmart_IG,HMMPfam_EGF,HMMPfam_G2F,superfamily_GFP_like,PatternScan_EGF_2,HMMPfam_EGF_CA,HMMPfam_I-set,HMMPfam_ig,PatternScan_EGF_CA,superfamily_SSF48726,sup	-	no_errors	Unknown	Unknown	Unknown	19	0	0	11	13	52	Somatic	0.999931	9.60828	0	0	0
2	31255724	31255724	G	T	SNP	Hmcn2	ENSMUST00000113532	mouse	ensembl	58_37k	1	known	missense	c.7048	p.V2350L	-	HMMSmart_IGc2,HMMPfam_I-set,superfamily_SSF48726	PatternScan_ASX_HYDROXYL,PatternScan_ARGE_DAPE_CPG2_1,HMMSmart_EGF_CA,HMMSmart_VWA,HMMSmart_IGc2,HMMSmart_IG,HMMPfam_EGF,HMMPfam_G2F,superfamily_GFP_like,PatternScan_EGF_2,HMMPfam_EGF_CA,HMMPfam_I-set,HMMPfam_ig,PatternScan_EGF_CA,superfamily_SSF48726,sup	-	no_errors	Unknown	Unknown	Unknown	34	0	0	13	24	64.86	Somatic	1	21.092	0	0	0
2	31275786	31275786	G	T	SNP	Hmcn2	ENSMUST00000113532	mouse	ensembl	58_37k	1	known	intronic	c.9903-32	e65-32	-	-	-	-	no_errors	Unknown	Unknown	Unknown	69	0	0	41	31	43.06	Somatic	1	24.3653	0	0	0
2	31530335	31530335	G	T	SNP	Exosc2	NM_144886.2	mouse	genbank	58_37k	1	provisional	intronic	c.360+31	e4+31	-	-	-	-	no_errors	Unknown	Unknown	Unknown	13	0	0	6	6	50	Somatic	0.995035	5.32858	3	1	25
2	31770449	31770449	G	T	SNP	Lamc3	NM_011836.3	mouse	genbank	58_37k	1	provisional	intronic	c.1851-31	e11-31	-	-	-	-	no_errors	Unknown	Unknown	Unknown	31	0	0	16	17	51.52	Somatic	0.999999	13.8767	1	0	0
2	31791249	31791249	C	G	SNP	Lamc3	NM_011836.3	mouse	genbank	58_37k	1	provisional	missense	c.3952	p.L1318V	-	NULL	HMMPfam_Laminin_B,HMMPfam_Laminin_EGF,HMMSmart_EGF_Lam,PatternScan_EGF_LAM_1,HMMPfam_Laminin_N,HMMSmart_LamNT,PatternScan_EGF_1,PatternScan_EGF_2,superfamily_SSF57196	-	no_errors	Unknown	Unknown	Unknown	44	0	0	36	27	42.86	Somatic	1	16.9775	2	0	0
2	31833505	31833505	G	C	SNP	Nup214	NM_172268.2	mouse	genbank	58_37k	1	validated	intronic	c.393+70	e3+70	-	-	-	-	no_errors	Unknown	Unknown	Unknown	30	0	0	18	17	48.57	Somatic	0.999997	12.8055	3	0	0
2	32050390	32050390	G	T	SNP	Bat2l	NM_172661.3	mouse	genbank	58_37k	1	validated	missense	c.991	p.G331C	-	NULL	HMMPfam_BAT2_N	-	no_errors	Unknown	Unknown	Unknown	54	0	0	27	20	42.55	Somatic	1	17.6647	120	136	52.92
2	32079135	32079135	G	T	SNP	Bat2l	NM_172661.3	mouse	genbank	58_37k	1	validated	intronic	c.3932+69	e25+69	-	-	-	-	no_errors	Unknown	Unknown	Unknown	75	0	0	53	51	49.04	Somatic	1	34.1372	0	0	0
2	32193400	32193400	C	A	SNP	Dnm1	NM_010065.2	mouse	genbank	58_37k	-1	validated	missense	c.703	p.V235L	-	HMMPfam_Dynamin_M,HMMSmart_DYNc,superfamily_SSF52540	HMMPfam_Dynamin_M,HMMPfam_Dynamin_N,HMMSmart_DYNc,HMMPfam_PH,HMMSmart_PH,HMMPfam_GED,HMMSmart_GED,PatternScan_DYNAMIN,superfamily_SSF50729,superfamily_SSF52540	-	no_errors	Unknown	Unknown	Unknown	61	0	0	31	31	50	Somatic	1	25.8523	16	18	52.94
2	32227300	32227300	G	T	SNP	Ciz1	NM_028412.1	mouse	genbank	58_37k	1	provisional	intronic	c.1452+23	e8+23	-	-	-	-	no_errors	Unknown	Unknown	Unknown	7	0	0	3	12	80	Somatic	0.999013	7.58181	2	2	50
2	32435984	32435984	G	A	SNP	Pip5kl1	NM_198191.2	mouse	genbank	58_37k	1	provisional	intronic	c.920+35	e9+35	-	-	-	-	no_errors	Unknown	Unknown	Unknown	30	0	0	17	13	43.33	Somatic	0.999973	10.5309	0	0	0
2	32597195	32597195	G	T	SNP	Sh2d3c	ENSMUST00000139563	mouse	ensembl	58_37k	1	known	splice_region	c.NULL	NULL	-	-	-	-	no_coding_region	Unknown	Unknown	Unknown	15	0	0	1	12	92.31	Somatic	0.999989	11.4468	0	0	0
2	32608683	32608683	T	A	SNP	Sh2d3c	NM_013781.2	mouse	genbank	58_37k	1	provisional	missense	c.2357	p.L786H	-	HMMSmart_SM00147	HMMPfam_SH2,HMMSmart_SM00252,HMMSmart_SM00147,superfamily_Ras GEF,superfamily_SH2 domain	-	no_errors	Unknown	Unknown	Unknown	66	0	0	48	25	34.25	Somatic	1	17.916	8	2	20
2	32630924	32630924	C	A	SNP	Ttc16	ENSMUST00000125891	mouse	ensembl	58_37k	-1	known	5_prime_untranslated_region	c.-32630924	NULL	-	-	-	-	no_coding_region	Unknown	Unknown	Unknown	136	0	0	92	72	43.9	Somatic	1	51.5035	0	2	100
2	32794406	32794406	T	A	SNP	Lrsam1	NM_199302.1	mouse	genbank	58_37k	-1	provisional	splice_site	c.1260-2	e16-2	-	-	-	-	no_errors	Unknown	Unknown	Unknown	23	0	0	21	12	36.36	Somatic	0.999279	7.23441	0	2	100
2	32818216	32818216	G	T	SNP	Rpl12	ENSMUST00000133842	mouse	ensembl	58_37k	1	known	3_prime_untranslated_region	c.*32818216	NULL	-	-	-	-	no_coding_region	Unknown	Unknown	Unknown	34	0	0	22	14	38.89	Somatic	0.999976	10.6295	15	22	59.46
2	32818897	32818897	G	T	SNP	ENSMUSG00000065124	ENSMUST00000083190	mouse	ensembl	58_37k	1	known	rna	NULL	NULL	-	-	-	-	no_errors	Unknown	Unknown	Unknown	91	0	0	46	48	51.06	Somatic	1	39.8617	101	96	48.73
2	32850660	32850660	G	T	SNP	Garnl3	NM_178888.4	mouse	genbank	58_37k	-1	provisional	silent	c.2232	p.A744	-	HMMPfam_CNH	HMMPfam_Rap_GAP,HMMPfam_CNH,superfamily_SSF111347	-	no_errors	Unknown	Unknown	Unknown	40	0	0	22	38	63.33	Somatic	1	26.5749	9	11	55
2	32862526	32862526	G	T	SNP	Garnl3	ENSMUST00000153717	mouse	ensembl	58_37k	-1	known	5_prime_untranslated_region	c.-32862526	NULL	-	-	-	-	no_coding_region	Unknown	Unknown	Unknown	14	0	0	8	14	63.64	Somatic	0.999894	9.49564	0	1	100
2	33023583	33023583	G	T	SNP	Ralgps1	NM_175211.4	mouse	genbank	58_37k	-1	provisional	intronic	c.910+118	e10+118	-	-	-	-	no_errors	Unknown	Unknown	Unknown	54	0	0	20	32	61.54	Somatic	1	29.731	0	0	0
2	33309696	33309696	T	A	SNP	Zbtb43	NM_027947.2	mouse	genbank	58_37k	-1	validated	missense	c.1036	p.S346C	-	NULL	HMMSmart_SM00225,HMMPfam_zf-C2H2,PatternScan_ZINC_FINGER_C2H2_1,superfamily_POZ domain,HMMPfam_BTB,HMMSmart_SM00355,superfamily_C2H2 and C2HC zinc fingers	-	no_errors	Unknown	Unknown	Unknown	31	0	0	26	25	49.02	Somatic	1	14.7729	28	50	64.1
2	34762535	34762535	C	T	SNP	Phf19	NM_028716.4	mouse	genbank	58_37k	-1	provisional	silent	c.348	p.K116	-	HMMSmart_PHD,superfamily_FYVE_PHD_ZnF,PatternScan_ZF_PHD_1,HMMPfam_PHD	HMMSmart_PHD,HMMSmart_TUDOR,superfamily_FYVE_PHD_ZnF,PatternScan_ZF_PHD_1,HMMPfam_PHD,superfamily_SSF63748	-	no_errors	Unknown	Unknown	Unknown	58	0	0	32	31	49.21	Somatic	1	24.6109	119	105	46.88
2	34975651	34975651	G	T	SNP	Cep110	ENSMUST00000028237	mouse	ensembl	58_37k	1	known	splice_region	c.808+8	e5+8	-	-	-	-	no_errors	Unknown	Unknown	Unknown	64	0	0	33	35	51.47	Somatic	1	28.5979	2	1	33.33
2	35139388	35139388	C	A	SNP	Gsn	NM_146120.3	mouse	genbank	58_37k	1	provisional	intronic	c.139-37	e2-37	-	-	-	-	no_errors	Unknown	Unknown	Unknown	21	0	0	14	12	46.15	Somatic	0.999805	8.54499	2	2	50
2	35564212	35564212	G	T	SNP	Dab2ip	NM_001001602.	mouse	genbank	58_37k	1	validated	intronic	c.1-122	e1-122	-	-	-	-	no_errors	Unknown	Unknown	Unknown	13	0	0	8	6	42.86	Somatic	0.990035	4.6107	0	0	0
2	35745864	35745864	C	A	SNP	Ttll11	NM_028921.2	mouse	genbank	58_37k	-1	validated	silent	c.732	p.L244	-	HMMPfam_TTL,superfamily_Glutathione synthetase ATP-binding domain-like	HMMPfam_TTL,superfamily_Glutathione synthetase ATP-binding domain-like	-	no_errors	Unknown	Unknown	Unknown	14	0	0	15	13	46.43	Somatic	0.998447	6.50887	0	0	0
2	35912413	35912413	C	A	SNP	Morn5	NM_029309.2	mouse	genbank	58_37k	1	provisional	intronic	c.308-126	e4-126	-	-	-	-	no_errors	Unknown	Unknown	Unknown	29	0	0	12	16	57.14	Somatic	0.999999	14.4232	0	0	0
2	36424877	36424877	G	T	SNP	Olfr344	NM_146628.1	mouse	genbank	58_37k	1	provisional	missense	c.758	p.G253V	-	HMMPfam_7tm_1,superfamily_SSF81321	HMMPfam_7tm_1,superfamily_SSF81321	-	no_errors	Unknown	Unknown	Unknown	203	0	0	109	88	44.67	Somatic	1	73.2944	0	0	0
2	36543826	36543826	G	C	SNP	Olfr346	NM_146938.1	mouse	genbank	58_37k	1	provisional	silent	c.303	p.V101	-	HMMPfam_7tm_1,superfamily_SSF81321	HMMPfam_7tm_1,PatternScan_G_PROTEIN_RECEP_F1_1,superfamily_SSF81321	-	no_errors	Unknown	Unknown	Unknown	343	0	0	166	164	49.7	Somatic	1	141.531	0	0	0
2	36642827	36642827	T	A	SNP	Olfr348	NM_146944.1	mouse	genbank	58_37k	1	provisional	missense	c.781	p.F261I	-	HMMPfam_7tm_1,superfamily_SSF81321	HMMPfam_7tm_1,PatternScan_G_PROTEIN_RECEP_F1_1,superfamily_SSF81321	-	no_errors	Unknown	Unknown	Unknown	201	0	0	83	78	48.45	Somatic	1	75.1041	0	0	0
2	36648914	36648914	T	C	SNP	Olfr50	NM_146946.1	mouse	genbank	58_37k	1	provisional	missense	c.157	p.S53P	-	HMMPfam_7tm_1,superfamily_SSF81321	HMMPfam_7tm_1,PatternScan_G_PROTEIN_RECEP_F1_1,superfamily_SSF81321	-	no_errors	Unknown	Unknown	Unknown	563	0	0	442	20	4.33	Somatic	0.999972	10.5222	0	0	0
2	36649375	36649375	C	A	SNP	Olfr50	NM_146946.1	mouse	genbank	58_37k	1	provisional	silent	c.618	p.V206	-	HMMPfam_7tm_1,superfamily_SSF81321	HMMPfam_7tm_1,PatternScan_G_PROTEIN_RECEP_F1_1,superfamily_SSF81321	-	no_errors	Unknown	Unknown	Unknown	188	0	0	85	65	43.33	Somatic	1	60.9443	0	0	0
2	36649385	36649385	C	A	SNP	Olfr50	NM_146946.1	mouse	genbank	58_37k	1	provisional	missense	c.628	p.P210T	-	HMMPfam_7tm_1,superfamily_SSF81321	HMMPfam_7tm_1,PatternScan_G_PROTEIN_RECEP_F1_1,superfamily_SSF81321	-	no_errors	Unknown	Unknown	Unknown	173	0	0	82	62	43.06	Somatic	1	56.5088	0	0	0
2	36960301	36960301	C	A	SNP	Olfr362	NM_147051.1	mouse	genbank	58_37k	-1	provisional	missense	c.868	p.A290S	-	HMMPfam_7tm_1,superfamily_SSF81321	HMMPfam_7tm_1,PatternScan_G_PROTEIN_RECEP_F1_1,superfamily_SSF81321	-	no_errors	Unknown	Unknown	Unknown	35	0	0	14	10	40	Somatic	0.999963	10.1973	0	0	0
2	37325083	37325083	A	C	SNP	Rabgap1	NM_146121.2	mouse	genbank	58_37k	1	validated	missense	c.137	p.K46T	-	NULL	HMMPfam_TBC,HMMSmart_SM00164,superfamily_Ypt/Rab-GAP domain of gyp1p,HMMPfam_PID,HMMSmart_SM00462,superfamily_PH domain-like	-	no_errors	Unknown	Unknown	Unknown	71	0	0	18	31	63.27	Somatic	1	35.6243	156	136	46.42
2	37647471	37647471	A	G	SNP	Crb2	ENSMUST00000050372	mouse	ensembl	58_37k	1	known	intronic	c.2446-103	e9-103	-	-	-	-	no_errors	Unknown	Unknown	Unknown	39	0	0	22	20	47.62	Somatic	1	15.8159	0	0	0
2	37656024	37656024	C	T	SNP	Dennd1a	NM_146122.3	mouse	genbank	58_37k	-1	validated	silent	c.2583	p.G861	-	NULL	HMMPfam_DENN,HMMSmart_DENN,HMMPfam_dDENN,HMMSmart_dDENN,HMMPfam_uDENN,HMMSmart_uDENN	-	no_errors	Unknown	Unknown	Unknown	34	0	0	20	8	28.57	Somatic	0.998829	6.7484	8	8	50
2	38875688	38875688	A	G	SNP	Golga1	NM_029793.1	mouse	genbank	58_37k	-1	provisional	intronic	c.1879-38	e18-38	-	-	-	-	no_errors	Unknown	Unknown	Unknown	31	0	0	23	15	39.47	Somatic	0.999967	10.3247	3	0	0
2	40677291	40677291	A	T	SNP	Lrp1b	NM_053011.2	mouse	genbank	58_37k	-1	validated	intronic	c.9815-37	e62-37	-	-	-	-	no_errors	Unknown	Unknown	Unknown	46	0	0	12	22	64.71	Somatic	1	24.5167	0	0	0
2	41044387	41044387	T	C	SNP	Lrp1b	NM_053011.2	mouse	genbank	58_37k	-1	validated	missense	c.5572	p.T1858A	-	HMMPfam_EGF,HMMSmart_SM00181,superfamily_EGF/Laminin	HMMPfam_Ldl_recept_b,HMMSmart_SM00135,PatternScan_ASX_HYDROXYL,HMMPfam_NHL,HMMSmart_SM00179,HMMPfam_Ldl_recept_a,HMMSmart_SM00192,PatternScan_LDLRA_1,superfamily_LDL receptor-like module,HMMPfam_EGF,HMMSmart_SM00181,PatternScan_EGF_1,PatternScan_EGF_2,HMM	-	no_errors	Unknown	Unknown	Unknown	138	0	0	73	37	33.64	Somatic	1	32.852	0	0	0
2	41101562	41101562	C	A	SNP	Lrp1b	NM_053011.2	mouse	genbank	58_37k	-1	validated	nonsense	c.5257	p.G1753*	-	HMMPfam_Ldl_recept_b,HMMSmart_SM00135,superfamily_YWTD domain	HMMPfam_Ldl_recept_b,HMMSmart_SM00135,PatternScan_ASX_HYDROXYL,HMMPfam_NHL,HMMSmart_SM00179,HMMPfam_Ldl_recept_a,HMMSmart_SM00192,PatternScan_LDLRA_1,superfamily_LDL receptor-like module,HMMPfam_EGF,HMMSmart_SM00181,PatternScan_EGF_1,PatternScan_EGF_2,HMM	-	no_errors	Unknown	Unknown	Unknown	96	0	0	26	30	53.57	Somatic	1	35.8653	0	0	0
2	41300605	41300605	G	A	SNP	Lrp1b	NM_053011.2	mouse	genbank	58_37k	-1	validated	intronic	c.2770+16	e17+16	-	-	-	-	no_errors	Unknown	Unknown	Unknown	60	0	0	22	29	55.77	Somatic	1	28.2837	0	0	0
2	43418536	43418536	T	A	SNP	Kynu	NM_027552.1	mouse	genbank	58_37k	1	provisional	missense	c.50	p.I17N	-	NULL	HMMPfam_Aminotran_5,superfamily_PyrdxlP-dep_Trfase_major	-	no_errors	Unknown	Unknown	Unknown	26	0	0	14	13	48.15	Somatic	0.999974	10.5682	0	0	0
2	44420971	44420971	T	A	SNP	Gtdc1	NM_172662.2	mouse	genbank	58_37k	-1	provisional	nonstop	c.1398	p.*466C	-	NULL	HMMPfam_Glycos_transf_1,superfamily_UDP-Glycosyltransferase/glycogen phosphorylase	-	no_errors	Unknown	Unknown	Unknown	110	0	0	46	45	49.45	Somatic	1	42.7105	27	31	53.45
2	49101638	49101638	G	A	SNP	Mbd5	NM_029924.2	mouse	genbank	58_37k	1	validated	missense	c.25	p.G9R	-	NULL	HMMPfam_PWWP,HMMPfam_MBD,superfamily_SSF63748	-	no_errors	Unknown	Unknown	Unknown	47	0	0	29	31	51.67	Somatic	1	22.3755	28	31	52.54
2	49127722	49127722	C	A	SNP	Mbd5	NM_029924.2	mouse	genbank	58_37k	1	validated	missense	c.2695	p.Q899K	-	NULL	HMMPfam_PWWP,HMMPfam_MBD,superfamily_SSF63748	-	no_errors	Unknown	Unknown	Unknown	113	0	0	42	47	52.81	Somatic	1	46.897	2	0	0
2	49801605	49801605	C	G	SNP	Lypd6b	NM_027990.3	mouse	genbank	58_37k	1	provisional	missense	c.277	p.Q93E	-	superfamily_Snake toxin-like	superfamily_Snake toxin-like	-	no_errors	Unknown	Unknown	Unknown	157	0	0	63	49	43.75	Somatic	1	49.347	0	0	0
2	52031289	52031289	G	T	SNP	Neb	ENSMUST00000131236	mouse	ensembl	58_37k	-1	known	5_prime_untranslated_region	c.-52031289	NULL	-	-	-	-	no_coding_region	Unknown	Unknown	Unknown	60	0	0	28	16	36.36	Somatic	1	15.2054	0	0	0
2	52063526	52063527	-	AGGAACTGATC	INS	Neb	ENSMUST00000036934	mouse	ensembl	58_37k	-1	known	intronic	c.13977+52_13977+51	e90+52	-	-	-	-	no_errors	Unknown	Unknown	Unknown	NA	NA	NA	NA	NA	NA	Somatic	NA	NA	NA	NA	NA
2	52082079	52082079	G	C	SNP	Neb	ENSMUST00000069592	mouse	ensembl	58_37k	-1	known	missense	c.2977	p.Q993E	-	HMMSmart_SM00227	HMMPfam_Nebulin,HMMSmart_SM00227	-	no_stop_codon	Unknown	Unknown	Unknown	25	0	0	9	7	43.75	Somatic	0.99946	7.52254	0	0	0
2	52084243	52084243	A	C	SNP	LOC100048270	XR_034090.1	mouse	genbank	58_37k	-1	model	rna	NULL	NULL	-	-	-	-	pseudogene	Unknown	Unknown	Unknown	115	0	0	75	8	9.64	Somatic	0.997598	6.03435	0	0	0
2	52107286	52107286	A	T	SNP	Neb	ENSMUST00000036934	mouse	ensembl	58_37k	-1	known	missense	c.9028	p.L3010I	-	HMMSmart_NEBU	HMMPfam_Nebulin,HMMSmart_NEBU,HMMPfam_SH3_1,HMMSmart_SH3,superfamily_SH3	-	no_errors	Unknown	Unknown	Unknown	57	0	0	46	9	16.36	Somatic	0.998046	6.2361	0	0	0
2	52135999	52135999	A	C	SNP	Neb	ENSMUST00000036934	mouse	ensembl	58_37k	-1	known	missense	c.5180	p.M1727R	-	HMMPfam_Nebulin,HMMSmart_NEBU	HMMPfam_Nebulin,HMMSmart_NEBU,HMMPfam_SH3_1,HMMSmart_SH3,superfamily_SH3	-	no_errors	Unknown	Unknown	Unknown	96	0	0	43	58	57.43	Somatic	1	49.5389	0	0	0
2	52142673	52142673	T	A	SNP	Neb	ENSMUST00000036934	mouse	ensembl	58_37k	-1	known	missense	c.4175	p.Q1392L	-	HMMSmart_NEBU	HMMPfam_Nebulin,HMMSmart_NEBU,HMMPfam_SH3_1,HMMSmart_SH3,superfamily_SH3	-	no_errors	Unknown	Unknown	Unknown	116	0	0	66	59	47.2	Somatic	1	46.519	0	0	0
2	52931178	52931178	G	T	SNP	Fmnl2	NM_172409.2	mouse	genbank	58_37k	1	validated	intronic	c.706-66	e8-66	-	-	-	-	no_errors	Unknown	Unknown	Unknown	31	0	0	14	14	50	Somatic	0.999997	12.6084	0	0	0
2	53050274	53050274	A	T	SNP	Prpf40a	ENSMUST00000125243	mouse	ensembl	58_37k	-1	known	5_prime_untranslated_region	c.-53	NULL	-	-	-	-	no_stop_codon	Unknown	Unknown	Unknown	35	0	0	15	18	54.55	Somatic	1	16.2096	2	7	77.78
2	54707231	54707231	C	A	SNP	Galnt13	NM_173030.2	mouse	genbank	58_37k	1	validated	intronic	c.478+52	e3+52	-	-	-	-	no_errors	Unknown	Unknown	Unknown	39	0	0	15	12	44.44	Somatic	0.999996	12.3533	0	0	0
2	54707236	54707236	C	G	SNP	Galnt13	NM_173030.2	mouse	genbank	58_37k	1	validated	intronic	c.478+57	e3+57	-	-	-	-	no_errors	Unknown	Unknown	Unknown	40	0	0	12	12	50	Somatic	0.999999	13.8474	0	0	0
2	55447047	55447047	C	A	SNP	Kcnj3	NM_008426.1	mouse	genbank	58_37k	1	provisional	intronic	c.920-175	e3-175	-	-	-	-	no_errors	Unknown	Unknown	Unknown	37	0	0	16	15	48.39	Somatic	0.999999	14.037	0	0	0
2	58632440	58632440	G	T	SNP	Upp2	NM_029692.2	mouse	genbank	58_37k	1	provisional	missense	c.692	p.C231F	-	HMMPfam_PNP_UDP_1,superfamily_Purine and uridine phosphorylases	HMMPfam_PNP_UDP_1,PatternScan_PNP_UDP_1,superfamily_Purine and uridine phosphorylases	-	no_errors	Unknown	Unknown	Unknown	10	0	0	8	5	38.46	Somatic	0.963042	3.28036	0	0	0
2	58642689	58642689	G	T	SNP	Upp2	NM_029692.2	mouse	genbank	58_37k	1	provisional	3_prime_untranslated_region	c.*98	NULL	-	-	-	-	no_errors	Unknown	Unknown	Unknown	68	0	0	36	33	47.83	Somatic	1	27.1906	0	0	0
2	59127247	59127247	C	T	SNP	Pkp4	NM_026361.2	mouse	genbank	58_37k	1	validated	intronic	c.246-28	e3-28	-	-	-	-	no_errors	Unknown	Unknown	Unknown	215	3	1.38	100	8	7.41	Somatic	0.97325	3.59736	0	0	0
2	59146256	59146256	G	T	SNP	Pkp4	NM_026361.2	mouse	genbank	58_37k	1	validated	silent	c.792	p.T264	-	NULL	HMMPfam_Arm,HMMSmart_SM00185,superfamily_ARM repeat	-	no_errors	Unknown	Unknown	Unknown	137	0	0	66	57	45.97	Somatic	1	50.4381	101	79	43.65
2	59815539	59815539	A	G	SNP	Baz2b	NM_001001182.	mouse	genbank	58_37k	-1	validated	silent	c.432	p.T144	-	NULL	HMMPfam_Bromodomain,HMMSmart_BROMO,superfamily_Bromodomain,HMMPfam_MBD,HMMSmart_PHD,HMMPfam_DDT,superfamily_FYVE_PHD_ZnF,superfamily_DNA-binding_integrase-type,PatternScan_BROMODOMAIN_1,HMMSmart_DDT,HMMPfam_PHD	-	no_errors	Unknown	Unknown	Unknown	180	0	0	156	9	5.45	Somatic	0.992739	4.96095	55	3	5.08
2	60090420	60090420	G	A	SNP	Cd302	NM_025422.3	mouse	genbank	58_37k	-1	provisional	silent	c.589	p.L197	-	NULL	HMMPfam_Lectin_C,HMMSmart_SM00034,superfamily_C-type lectin-like	-	no_errors	Unknown	Unknown	Unknown	28	0	0	22	13	37.14	Somatic	0.999834	8.70068	19	14	42.42
2	61638208	61638208	G	T	SNP	Psmd14	NM_021526.2	mouse	genbank	58_37k	1	validated	3_prime_untranslated_region	c.*71	NULL	-	-	-	-	no_errors	Unknown	Unknown	Unknown	23	0	0	7	6	46.15	Somatic	0.999104	7.01663	438	503	53.45
2	61638250	61638250	A	T	SNP	Psmd14	NM_021526.2	mouse	genbank	58_37k	1	validated	3_prime_untranslated_region	c.*113	NULL	-	-	-	-	no_errors	Unknown	Unknown	Unknown	21	0	0	5	6	54.55	Somatic	0.999525	7.65232	517	417	44.46
2	61642742	61642742	G	T	SNP	Tbr1	NM_009322.3	mouse	genbank	58_37k	1	provisional	5_prime_untranslated_region	c.-23	NULL	-	-	-	-	no_errors	Unknown	Unknown	Unknown	26	0	0	13	12	48	Somatic	0.999965	10.2553	0	0	0
2	61643396	61643396	G	T	SNP	Tbr1	NM_009322.3	mouse	genbank	58_37k	1	provisional	missense	c.632	p.R211M	-	HMMPfam_T-box,HMMSmart_TBOX,superfamily_P53_like_DNA_bnd	HMMPfam_T-box,HMMSmart_TBOX,superfamily_P53_like_DNA_bnd,PatternScan_TBOX_2,PatternScan_TBOX_1	-	no_errors	Unknown	Unknown	Unknown	39	1	2.5	16	14	46.67	Somatic	0.999976	10.6458	0	0	0
2	62106234	62106234	G	T	SNP	Slc4a10	NM_033552.2	mouse	genbank	58_37k	1	validated	missense	c.1564	p.G522W	-	HMMPfam_HCO3_cotransp	HMMPfam_HCO3_cotransp,HMMPfam_Band_3_cyto,superfamily_Phoshotransferase/anion transport protein,PatternScan_HTH_ARAC_FAMILY_1	-	no_errors	Unknown	Unknown	Unknown	129	0	0	67	50	42.74	Somatic	1	43.0446	0	0	0
2	62217361	62217361	G	T	SNP	Dpp4	NM_010074.3	mouse	genbank	58_37k	-1	validated	nonsense	c.374	p.S125*	-	HMMPfam_DPPIV_N,superfamily_Dipeptidyl peptidase IV/CD26 N-terminal domain	HMMPfam_Peptidase_S9,HMMPfam_DPPIV_N,PatternScan_PRO_ENDOPEP_SER,superfamily_alpha/beta-Hydrolases,superfamily_Dipeptidyl peptidase IV/CD26 N-terminal domain	-	no_errors	Unknown	Unknown	Unknown	62	0	0	26	23	46.94	Somatic	1	22.1404	0	0	0
2	62386489	62386494	TCTCTC	-	DEL	Fap	NM_007986.2	mouse	genbank	58_37k	-1	provisional	intronic	c.486+133_486+128	e7+133	-	-	-	-	no_errors	Unknown	Unknown	Unknown	NA	NA	NA	NA	NA	NA	Somatic	NA	NA	NA	NA	NA
2	65367596	65367596	C	A	SNP	Scn3a	NM_018732.3	mouse	genbank	58_37k	-1	validated	intronic	c.384-60	e3-60	-	-	-	-	no_errors	Unknown	Unknown	Unknown	51	0	0	17	20	54.05	Somatic	1	21.1272	0	0	0
2	65691270	65691270	G	T	SNP	LOC677214	XR_034446.1	mouse	genbank	58_37k	1	model	rna	NULL	NULL	-	-	-	-	pseudogene	Unknown	Unknown	Unknown	38	0	0	11	8	42.11	Somatic	0.999945	9.80532	0	0	0
2	66165805	66165805	T	C	SNP	Scn1a	NM_018733.2	mouse	genbank	58_37k	-1	validated	missense	c.1280	p.E427G	-	superfamily_SSF81324	HMMPfam_IQ,HMMSmart_IQ,HMMPfam_Ion_trans,HMMPfam_Na_trans_assoc,PatternScan_RIBONUCLEASE_P,superfamily_SSF81324	-	no_errors	Unknown	Unknown	Unknown	239	0	0	111	128	53.56	Somatic	1	110.278	0	0	0
2	67363171	67363171	C	A	SNP	Xirp2	NM_001024618.2	mouse	genbank	58_37k	1	provisional	silent	c.10218	p.P3406	-	NULL	HMMPfam_LIM,HMMSmart_SM00132,PatternScan_LIM_DOMAIN_1,PatternScan_SER_THR_PHOSPHATASE,HMMPfam_Xin,superfamily_Glucocorticoid receptor-like (DNA-binding domain)	-	no_errors	Unknown	Unknown	Unknown	38	0	0	17	17	50	Somatic	1	15.4031	0	0	0
2	68946793	68946793	T	G	SNP	Lass6	NM_172856.3	mouse	genbank	58_37k	1	provisional	3_prime_untranslated_region	c.*142	NULL	-	-	-	-	no_errors	Unknown	Unknown	Unknown	8	0	0	4	6	60	Somatic	0.987114	4.64674	54	50	48.08
2	69123512	69123512	T	A	SNP	Abcb11	NM_021022.3	mouse	genbank	58_37k	-1	reviewed	intronic	c.1639-75	e14-75	-	-	-	-	no_errors	Unknown	Unknown	Unknown	16	0	0	13	5	27.78	Somatic	0.967746	3.40152	0	0	0
2	69293696	69293696	G	T	SNP	Lrp2	NM_001081088.1	mouse	genbank	58_37k	-1	provisional	intronic	c.11270-63	e59-63	-	-	-	-	no_errors	Unknown	Unknown	Unknown	48	0	0	25	21	45.65	Somatic	1	17.7381	0	0	0
2	69315017	69315017	C	A	SNP	Lrp2	NM_001081088.1	mouse	genbank	58_37k	-1	provisional	intronic	c.8704+50	e46+50	-	-	-	-	no_errors	Unknown	Unknown	Unknown	32	0	0	13	19	59.38	Somatic	1	16.9879	0	0	0
2	69324264	69324264	G	A	SNP	Lrp2	NM_001081088.1	mouse	genbank	58_37k	-1	provisional	silent	c.6429	p.I2143	-	HMMPfam_Ldl_recept_b,HMMSmart_LY,superfamily_SSF63825	HMMPfam_Ldl_recept_b,HMMSmart_LY,PatternScan_ASX_HYDROXYL,HMMSmart_EGF_CA,HMMPfam_Ldl_recept_a,HMMSmart_LDLa,PatternScan_LDLRA_1,superfamily_LDL_rcpt_classA_cys-rich,HMMPfam_EGF,HMMSmart_EGF,PatternScan_EGF_1,PatternScan_EGF_2,HMMPfam_EGF_CA,PatternScan_E	-	no_errors	Unknown	Unknown	Unknown	87	0	0	59	53	47.32	Somatic	1	36.9895	0	0	0
2	69349107	69349107	C	G	SNP	Lrp2	NM_001081088.1	mouse	genbank	58_37k	-1	provisional	missense	c.2785	p.D929H	-	HMMSmart_LY,superfamily_SSF63825	HMMPfam_Ldl_recept_b,HMMSmart_LY,PatternScan_ASX_HYDROXYL,HMMSmart_EGF_CA,HMMPfam_Ldl_recept_a,HMMSmart_LDLa,PatternScan_LDLRA_1,superfamily_LDL_rcpt_classA_cys-rich,HMMPfam_EGF,HMMSmart_EGF,PatternScan_EGF_1,PatternScan_EGF_2,HMMPfam_EGF_CA,PatternScan_E	-	no_errors	Unknown	Unknown	Unknown	83	0	0	45	40	47.06	Somatic	1	32.6064	0	0	0
2	69485310	69485310	T	A	SNP	Bbs5	ENSMUST00000074963	mouse	ensembl	58_37k	1	known	5_prime_untranslated_region	c.-31	NULL	-	-	-	-	no_errors	Unknown	Unknown	Unknown	107	0	0	82	67	44.97	Somatic	1	43.5628	12	8	38.1
2	69532647	69532647	G	T	SNP	Fastkd1	NM_177244.3	mouse	genbank	58_37k	-1	provisional	missense	c.1961	p.A654E	-	HMMPfam_FAST_2	HMMPfam_FAST_1,HMMPfam_FAST_2,HMMPfam_RAP	-	no_errors	Unknown	Unknown	Unknown	49	0	0	21	24	52.17	Somatic	1	21.8177	50	48	48.98
2	69540380	69540380	G	T	SNP	Fastkd1	NM_177244.3	mouse	genbank	58_37k	-1	provisional	intronic	c.1659+40	e7+40	-	-	-	-	no_errors	Unknown	Unknown	Unknown	47	0	0	25	14	35.9	Somatic	0.999995	12.2745	0	0	0
2	69817438	69817438	G	T	SNP	Ubr3	ENSMUST00000055758	mouse	ensembl	58_37k	1	known	missense	c.3697	p.V1233L	-	NULL	HMMPfam_zf-UBR,HMMSmart_SM00396,HMMPfam_zf-C3HC4,superfamily_RING/U-box	-	no_errors	Unknown	Unknown	Unknown	110	0	0	89	50	35.97	Somatic	1	32.9693	59	70	53.85
2	70438684	70438684	C	A	SNP	Gad1	NM_008077.4	mouse	genbank	58_37k	1	provisional	missense	c.1613	p.A538D	-	superfamily_PLP-dependent transferases	HMMPfam_Pyridoxal_deC,PatternScan_DDC_GAD_HDC_YDC,superfamily_PLP-dependent transferases	-	no_errors	Unknown	Unknown	Unknown	28	0	0	11	9	45	Somatic	0.999891	9.11954	0	0	0
2	71733815	71733815	G	T	SNP	Pdk1	NM_172665.4	mouse	genbank	58_37k	1	validated	missense	c.1009	p.A337S	-	HMMPfam_HATPase_c,HMMSmart_HATPase_c,superfamily_ATP_bd_ATPase	HMMPfam_HATPase_c,HMMSmart_HATPase_c,superfamily_ATP_bd_ATPase,HMMPfam_BCDHK_Adom3,superfamily_SSF69012	-	no_errors	Unknown	Unknown	Unknown	28	0	0	22	25	53.19	Somatic	1	14.975	150	101	40.24
2	72043905	72043905	G	T	SNP	Rapgef4	NM_019688.1	mouse	genbank	58_37k	1	provisional	intronic	c.1525+105	e15+105	-	-	-	-	no_errors	Unknown	Unknown	Unknown	23	0	0	10	14	58.33	Somatic	0.999994	12.0936	0	0	0
2	72202768	72202768	G	T	SNP	B230120H23Rik	NM_023057.5	mouse	genbank	58_37k	1	validated	missense	c.331	p.A111S	-	HMMPfam_Pkinase_Tyr,HMMSmart_SM00219,HMMSmart_SM00220,superfamily_Protein kinase-like (PK-like)	HMMPfam_Pkinase_Tyr,HMMSmart_SM00219,HMMPfam_SAM_1,HMMSmart_SM00454,HMMSmart_SM00220,PatternScan_PROTEIN_KINASE_ST,superfamily_SAM/Pointed domain,superfamily_Protein kinase-like (PK-like),PatternScan_ATPASE_ALPHA_BETA	-	no_errors	Unknown	Unknown	Unknown	44	0	0	22	24	52.17	Somatic	1	19.9089	152	124	44.93
2	73409702	73409702	C	T	SNP	Chrna1	NM_007389.4	mouse	genbank	58_37k	-1	provisional	intronic	c.345-37	e5-37	-	-	-	-	no_errors	Unknown	Unknown	Unknown	17	0	0	9	15	62.5	Somatic	0.999977	10.8768	0	0	0
2	73418368	73418368	G	T	SNP	Chrna1	ENSMUST00000028515	mouse	ensembl	58_37k	-1	known	5_prime_untranslated_region	c.-24	NULL	-	-	-	-	no_errors	Unknown	Unknown	Unknown	45	0	0	21	33	61.11	Somatic	1	26.4772	0	0	0
2	74708570	74708570	T	C	SNP	Mtx2	NM_016804.4	mouse	genbank	58_37k	1	validated	intronic	c.620+29	e9+29	-	-	-	-	no_errors	Unknown	Unknown	Unknown	40	0	0	24	11	31.43	Somatic	0.999886	9.07719	0	1	100
2	75689578	75689578	G	T	SNP	Agps	NM_172666.3	mouse	genbank	58_37k	1	validated	missense	c.249	p.W83C	-	NULL	HMMPfam_FAD-oxidase_C,HMMPfam_FAD_binding_4,superfamily_FAD-binding_2	-	no_errors	Unknown	Unknown	Unknown	67	0	0	25	25	50	Somatic	1	25.3672	85	92	51.98
2	75700184	75700184	G	T	SNP	Agps	NM_172666.3	mouse	genbank	58_37k	1	validated	intronic	c.831+113	e8+113	-	-	-	-	no_errors	Unknown	Unknown	Unknown	33	0	0	14	11	44	Somatic	0.999977	10.692	1	2	66.67
2	76175734	76175734	C	A	SNP	Pde11a	NM_001081033.1	mouse	genbank	58_37k	-1	provisional	intronic	c.912+19	e1+19	-	-	-	-	no_errors	Unknown	Unknown	Unknown	18	0	0	4	6	60	Somatic	0.999514	7.63721	0	0	0
2	76194247	76194247	G	C	SNP	Cyct	NM_009989.2	mouse	genbank	58_37k	-1	validated	missense	c.59	p.T20R	-	HMMPfam_Cytochrom_C,superfamily_Cytochrome c	HMMPfam_Cytochrom_C,superfamily_Cytochrome c	-	no_errors	Unknown	Unknown	Unknown	190	0	0	93	77	45.03	Somatic	1	67.8724	0	0	0
2	76210367	76210367	G	A	SNP	Rbm45	NM_153405.2	mouse	genbank	58_37k	1	validated	intronic	c.423+153	e2+153	-	-	-	-	no_errors	Unknown	Unknown	Unknown	21	0	0	14	12	46.15	Somatic	0.999805	8.54499	3	3	50
2	76362029	76362029	G	C	SNP	Osbpl6	NM_145525.2	mouse	genbank	58_37k	1	provisional	5_prime_untranslated_region	c.-71	NULL	-	-	-	-	no_errors	Unknown	Unknown	Unknown	58	0	0	14	24	63.16	Somatic	1	28.3931	2	4	66.67
2	76481223	76481223	C	A	SNP	Prkra	NM_011871.2	mouse	genbank	58_37k	-1	provisional	intronic	c.317+57	e3+57	-	-	-	-	no_errors	Unknown	Unknown	Unknown	39	0	0	15	24	61.54	Somatic	1	21.768	2	0	0
2	76481230	76481230	C	A	SNP	Prkra	NM_011871.2	mouse	genbank	58_37k	-1	provisional	intronic	c.317+50	e3+50	-	-	-	-	no_errors	Unknown	Unknown	Unknown	39	0	0	17	29	63.04	Somatic	1	23.8608	2	0	0
2	76481350	76481350	T	A	SNP	Prkra	NM_011871.2	mouse	genbank	58_37k	-1	provisional	missense	c.247	p.S83C	-	HMMPfam_dsrm,HMMSmart_SM00358,superfamily_dsRNA-binding domain-like	HMMPfam_dsrm,HMMSmart_SM00358,superfamily_dsRNA-binding domain-like	-	no_errors	Unknown	Unknown	Unknown	58	0	0	41	6	12.77	Somatic	0.988592	4.46557	141	25	15.06
2	76496258	76496258	G	T	SNP	Dfnb59	NM_001080711.1	mouse	genbank	58_37k	1	provisional	intronic	c.767-52	e6-52	-	-	-	-	no_errors	Unknown	Unknown	Unknown	51	0	0	25	34	57.63	Somatic	1	27.3017	0	0	0
2	76511169	76511169	G	C	SNP	Prkra	NM_011871.2	mouse	genbank	58_37k	-1	provisional	5_prime_flanking_region	c.-25256	NULL	-	-	-	-	no_errors	Unknown	Unknown	Unknown	16	0	0	6	6	50	Somatic	0.997676	6.06966	1	0	0
2	76513589	76513589	G	A	SNP	Plekha3	ENSMUST00000111920	mouse	ensembl	58_37k	1	known	5_prime_untranslated_region	c.-63	NULL	-	-	-	-	no_errors	Unknown	Unknown	Unknown	5	0	0	6	7	53.85	Somatic	0.924968	3.00581	15	10	40
2	76525461	76525461	G	T	SNP	Plekha3	NM_031256.3	mouse	genbank	58_37k	1	validated	silent	c.573	p.P191	-	NULL	HMMPfam_PH,HMMSmart_SM00233	-	no_errors	Unknown	Unknown	Unknown	52	0	0	18	28	60.87	Somatic	1	27.3187	253	255	50.2
2	76546534	76546534	G	T	SNP	Ttn	NM_011652.3	mouse	genbank	58_37k	-1	validated	missense	c.98770	p.P32924T	-	HMMSmart_SM00408,HMMSmart_SM00409	HMMSmart_SM00219,HMMSmart_SM00220,PatternScan_IG_MHC,HMMSmart_SM00406,HMMSmart_SM00408,HMMSmart_SM00409,HMMSmart_SM00060,PatternScan_PROTEIN_KINASE_TYR,PatternScan_FGGY_KINASES_1,PatternScan_PEROXIDASE_1	-	no_errors	Unknown	Unknown	Unknown	74	0	0	21	19	47.5	Somatic	1	22.9444	0	2	100
2	76575978	76575978	G	T	SNP	Ttn	NM_011652.3	mouse	genbank	58_37k	-1	validated	missense	c.77389	p.R25797S	-	HMMSmart_SM00060	HMMSmart_SM00219,HMMSmart_SM00220,PatternScan_IG_MHC,HMMSmart_SM00406,HMMSmart_SM00408,HMMSmart_SM00409,HMMSmart_SM00060,PatternScan_PROTEIN_KINASE_TYR,PatternScan_FGGY_KINASES_1,PatternScan_PEROXIDASE_1	-	no_errors	Unknown	Unknown	Unknown	124	0	0	42	35	45.45	Somatic	1	38.6372	0	0	0
2	76585471	76585471	C	-	DEL	Ttn	NM_011652.3	mouse	genbank	58_37k	-1	validated	frame_shift_del	c.67896	p.L22633fs	-	HMMSmart_SM00408,HMMSmart_SM00409	HMMSmart_SM00219,HMMSmart_SM00220,PatternScan_IG_MHC,HMMSmart_SM00406,HMMSmart_SM00408,HMMSmart_SM00409,HMMSmart_SM00060,PatternScan_PROTEIN_KINASE_TYR,PatternScan_FGGY_KINASES_1,PatternScan_PEROXIDASE_1	-	no_errors	Unknown	Unknown	Unknown	81	0	0	45	29	39.19	Somatic	1	24.3443	0	0	0
2	76585473	76585473	G	T	SNP	Ttn	NM_011652.3	mouse	genbank	58_37k	-1	validated	silent	c.67894	p.R22632	-	HMMSmart_SM00408,HMMSmart_SM00409	HMMSmart_SM00219,HMMSmart_SM00220,PatternScan_IG_MHC,HMMSmart_SM00406,HMMSmart_SM00408,HMMSmart_SM00409,HMMSmart_SM00060,PatternScan_PROTEIN_KINASE_TYR,PatternScan_FGGY_KINASES_1,PatternScan_PEROXIDASE_1	-	no_errors	Unknown	Unknown	Unknown	81	0	0	41	32	43.84	Somatic	1	27.839	0	0	0
2	76586899	76586899	C	A	SNP	Ttn	NM_011652.3	mouse	genbank	58_37k	-1	validated	missense	c.66468	p.Q22156H	-	HMMSmart_SM00060	HMMSmart_SM00219,HMMSmart_SM00220,PatternScan_IG_MHC,HMMSmart_SM00406,HMMSmart_SM00408,HMMSmart_SM00409,HMMSmart_SM00060,PatternScan_PROTEIN_KINASE_TYR,PatternScan_FGGY_KINASES_1,PatternScan_PEROXIDASE_1	-	no_errors	Unknown	Unknown	Unknown	92	0	0	41	52	55.91	Somatic	1	45.1495	0	1	100
2	76612721	76612721	C	G	SNP	Ttn	NM_011652.3	mouse	genbank	58_37k	-1	validated	splice_site	c.49688-1	e242-1	-	-	-	-	no_errors	Unknown	Unknown	Unknown	136	0	0	53	53	50	Somatic	1	52.3668	0	0	0
2	76668574	76668574	A	G	SNP	Ttn	NM_011652.3	mouse	genbank	58_37k	-1	validated	intronic	c.31892-1561	e155-1561	-	-	-	-	no_errors	Unknown	Unknown	Unknown	549	0	0	277	131	32.11	Somatic	1	120.491	0	0	0
2	76678166	76678166	T	A	SNP	Ttn	NM_011652.3	mouse	genbank	58_37k	-1	validated	intronic	c.31579+124	e150+124	-	-	-	-	no_errors	Unknown	Unknown	Unknown	23	0	0	6	5	45.45	Somatic	0.99832	6.38723	0	0	0
2	76686310	76686310	G	C	SNP	Ttn	NM_011652.3	mouse	genbank	58_37k	-1	validated	intronic	c.30148+26	e138+26	-	-	-	-	no_errors	Unknown	Unknown	Unknown	65	0	0	47	35	42.68	Somatic	1	24.0744	0	0	0
2	76698056	76698056	T	C	SNP	Ttn	NM_011652.3	mouse	genbank	58_37k	-1	validated	splice_site	c.27848-2	e116-2	-	-	-	-	no_errors	Unknown	Unknown	Unknown	74	0	0	21	38	64.41	Somatic	1	40.4147	0	0	0
2	76706022	76706022	G	T	SNP	Ttn	NM_011652.3	mouse	genbank	58_37k	-1	validated	intronic	c.26761+43	e104+43	-	-	-	-	no_errors	Unknown	Unknown	Unknown	115	0	0	51	51	50	Somatic	1	46.4678	0	0	0
2	76717955	76717955	C	A	SNP	Ttn	NM_011652.3	mouse	genbank	58_37k	-1	validated	intronic	c.23011+85	e88+85	-	-	-	-	no_errors	Unknown	Unknown	Unknown	65	0	0	26	18	40.91	Somatic	1	18.4216	0	0	0
2	76737846	76737846	C	A	SNP	Ttn	NM_011652.3	mouse	genbank	58_37k	-1	validated	missense	c.12709	p.G4237C	-	HMMSmart_SM00408,HMMSmart_SM00409	HMMSmart_SM00219,HMMSmart_SM00220,PatternScan_IG_MHC,HMMSmart_SM00406,HMMSmart_SM00408,HMMSmart_SM00409,HMMSmart_SM00060,PatternScan_PROTEIN_KINASE_TYR,PatternScan_FGGY_KINASES_1,PatternScan_PEROXIDASE_1	-	no_errors	Unknown	Unknown	Unknown	26	0	0	13	12	48	Somatic	0.999965	10.2553	0	0	0
2	76739702	76739702	T	G	SNP	Ttn	NM_011652.3	mouse	genbank	58_37k	-1	validated	missense	c.11601	p.E3867D	-	HMMSmart_SM00406,HMMSmart_SM00408,HMMSmart_SM00409	HMMSmart_SM00219,HMMSmart_SM00220,PatternScan_IG_MHC,HMMSmart_SM00406,HMMSmart_SM00408,HMMSmart_SM00409,HMMSmart_SM00060,PatternScan_PROTEIN_KINASE_TYR,PatternScan_FGGY_KINASES_1,PatternScan_PEROXIDASE_1	-	no_errors	Unknown	Unknown	Unknown	85	0	0	26	35	57.38	Somatic	1	37.9416	0	0	0
2	76745388	76745388	G	T	SNP	Ttn	NM_028004.2	mouse	genbank	58_37k	-1	validated	missense	c.12863	p.A4288E	-	HMMSmart_SM00409	HMMSmart_SM00219,HMMSmart_SM00220,PatternScan_IG_MHC,HMMSmart_SM00406,HMMSmart_SM00408,HMMSmart_SM00409,HMMSmart_SM00060,PatternScan_PROTEIN_KINASE_TYR,PatternScan_FGGY_KINASES_1,PatternScan_PEROXIDASE_1	-	no_errors	Unknown	Unknown	Unknown	188	0	0	98	87	47.03	Somatic	1	72.8066	0	0	0
2	76757620	76757620	T	C	SNP	Ttn	ENSMUST00000099980	mouse	ensembl	58_37k	-1	known	missense	c.11141	p.E3714G	-	NULL	PatternScan_THIOL_PROTEASE_HIS,PatternScan_IG_MHC,HMMSmart_IGc2,HMMSmart_IG,HMMPfam_I-set,HMMPfam_Titin_Z,superfamily_SSF48726	-	no_errors	Unknown	Unknown	Unknown	143	0	0	93	9	8.82	Somatic	0.998753	6.69128	0	0	0
2	76758369	76758369	A	C	SNP	Ttn	ENSMUST00000099980	mouse	ensembl	58_37k	-1	known	silent	c.10392	p.T3464	-	HMMPfam_I-set,superfamily_SSF48726	PatternScan_THIOL_PROTEASE_HIS,PatternScan_IG_MHC,HMMSmart_IGc2,HMMSmart_IG,HMMPfam_I-set,HMMPfam_Titin_Z,superfamily_SSF48726	-	no_errors	Unknown	Unknown	Unknown	80	0	0	30	32	51.61	Somatic	1	32.0242	0	0	0
2	76782415	76782415	G	T	SNP	Ttn	NM_011652.3	mouse	genbank	58_37k	-1	validated	silent	c.6477	p.A2159	-	HMMSmart_SM00409	HMMSmart_SM00219,HMMSmart_SM00220,PatternScan_IG_MHC,HMMSmart_SM00406,HMMSmart_SM00408,HMMSmart_SM00409,HMMSmart_SM00060,PatternScan_PROTEIN_KINASE_TYR,PatternScan_FGGY_KINASES_1,PatternScan_PEROXIDASE_1	-	no_errors	Unknown	Unknown	Unknown	93	0	0	32	34	51.52	Somatic	1	35.8682	0	0	0
2	76783547	76783547	G	A	SNP	Ttn	NM_011652.3	mouse	genbank	58_37k	-1	validated	missense	c.5345	p.T1782I	-	HMMSmart_SM00409	HMMSmart_SM00219,HMMSmart_SM00220,PatternScan_IG_MHC,HMMSmart_SM00406,HMMSmart_SM00408,HMMSmart_SM00409,HMMSmart_SM00060,PatternScan_PROTEIN_KINASE_TYR,PatternScan_FGGY_KINASES_1,PatternScan_PEROXIDASE_1	-	no_errors	Unknown	Unknown	Unknown	68	0	0	31	47	60.26	Somatic	1	38.6366	0	0	0
2	77000342	77000342	C	A	SNP	Ccdc141	ENSMUST00000111833	mouse	ensembl	58_37k	-1	known	missense	c.237	p.K79N	-	NULL	NULL	-	no_errors	Unknown	Unknown	Unknown	15	0	0	5	8	61.54	Somatic	0.999619	7.93917	0	0	0
2	77050592	77050592	A	C	SNP	Sestd1	NM_175465.5	mouse	genbank	58_37k	-1	validated	missense	c.674	p.F225C	-	NULL	HMMSmart_SPEC,superfamily_Spectrin	-	no_errors	Unknown	Unknown	Unknown	25	0	0	10	13	56.52	Somatic	0.999994	12.0387	142	103	42.04
2	77755271	77755271	C	A	SNP	Cwc22	NM_030560.3	mouse	genbank	58_37k	-1	provisional	intronic	c.1205-51	e11-51	-	-	-	-	no_errors	Unknown	Unknown	Unknown	291	0	0	87	125	58.96	Somatic	1	135.58	0	0	0
2	77770780	77770780	C	A	SNP	Cwc22	NM_030560.3	mouse	genbank	58_37k	-1	provisional	missense	c.68	p.R23L	-	NULL	HMMPfam_MIF4G,HMMSmart_SM00543,HMMPfam_MA3,HMMSmart_SM00544,superfamily_ARM repeat	-	no_errors	Unknown	Unknown	Unknown	37	0	0	23	23	50	Somatic	1	16.7301	134	120	47.06
2	79498640	79498640	G	T	SNP	Ssfa2	NM_080558.4	mouse	genbank	58_37k	1	validated	intronic	c.2775+134	e11+134	-	-	-	-	no_errors	Unknown	Unknown	Unknown	11	0	0	1	6	85.71	Somatic	0.999626	8.47589	3	0	0
2	79501696	79501696	G	T	SNP	Ssfa2	NM_080558.4	mouse	genbank	58_37k	1	validated	intronic	c.3133-100	e15-100	-	-	-	-	no_errors	Unknown	Unknown	Unknown	58	0	0	32	32	50	Somatic	1	25.2598	0	0	0
2	80133651	80133651	A	C	SNP	Prdx6-rs1	NM_177256.4	mouse	genbank	58_37k	1	validated	missense	c.646	p.N216H	-	superfamily_Thiordxn-like_fd,HMMPfam_1-cysPrx_C	HMMPfam_AhpC-TSA,superfamily_Thiordxn-like_fd,HMMPfam_1-cysPrx_C	-	no_errors	Unknown	Unknown	Unknown	181	0	0	121	57	32.02	Somatic	1	43.6779	0	0	0
2	82099132	82099132	G	T	SNP	Zfp804a	NM_175513.3	mouse	genbank	58_37k	1	validated	silent	c.3147	p.P1049	-	NULL	PatternScan_ZINC_FINGER_C2H2_1,HMMSmart_ZnF_C2H2	-	no_errors	Unknown	Unknown	Unknown	287	0	0	81	93	53.14	Somatic	1	108.712	0	0	0
2	82823553	82823553	C	A	SNP	Fsip2	XM_141020.6	mouse	genbank	58_37k	1	model	missense	c.8519	p.T2840K	-	superfamily_Concanavalin A-like lectins/glucanases	superfamily_Concanavalin A-like lectins/glucanases	-	no_errors	Unknown	Unknown	Unknown	32	0	0	12	9	42.86	Somatic	0.999924	9.48343	0	0	0
2	83606960	83606960	G	T	SNP	Itgav	NM_008402.2	mouse	genbank	58_37k	1	validated	intronic	c.802+132	e8+132	-	-	-	-	no_errors	Unknown	Unknown	Unknown	6	0	0	3	4	57.14	Somatic	0.94617	3.18348	0	0	0
2	84510740	84510740	C	-	DEL	2700094K13Rik	NM_001033166.2	mouse	genbank	58_37k	-1	reviewed	frame_shift_del	c.4	p.A2fs	-	NULL	NULL	-	pseudogene	Unknown	Unknown	Unknown	153	0	0	108	80	42.55	Somatic	1	56.0135	401	143	26.29
2	84534621	84534621	C	-	DEL	Zdhhc5	NM_144887.4	mouse	genbank	58_37k	-1	validated	intronic	c.558-47	e5-47	-	-	-	-	no_errors	Unknown	Unknown	Unknown	37	0	0	17	12	41.38	Somatic	0.999987	11.2533	1	2	66.67
2	84655441	84655441	G	T	SNP	Smtnl1	NM_024230.2	mouse	genbank	58_37k	-1	provisional	splice_region	c.1235+7	e6+7	-	-	-	-	no_errors	Unknown	Unknown	Unknown	18	0	0	16	10	38.46	Somatic	0.99771	6.07809	0	0	0
2	84882838	84882838	T	A	SNP	Ssrp1	NM_182990.3	mouse	genbank	58_37k	1	provisional	intronic	c.1297-12	e10-12	-	-	-	-	no_errors	Unknown	Unknown	Unknown	55	0	0	71	10	12.35	Somatic	0.992584	4.89667	13	0	0
2	84883206	84883206	T	G	SNP	Ssrp1	NM_182990.3	mouse	genbank	58_37k	1	provisional	intronic	c.1481+48	e11+48	-	-	-	-	no_errors	Unknown	Unknown	Unknown	79	0	0	83	8	8.79	Somatic	0.987565	4.37671	19	0	0
2	85419658	85419658	A	T	SNP	Olfr996	NM_146437.2	mouse	genbank	58_37k	1	validated	silent	c.261	p.A87	-	HMMPfam_7tm_1,superfamily_SSF81321	HMMPfam_7tm_1,PatternScan_G_PROTEIN_RECEP_F1_1,superfamily_SSF81321	-	no_errors	Unknown	Unknown	Unknown	257	0	0	100	86	46.24	Somatic	1	87.0449	0	0	0
2	85625983	85625983	G	A	SNP	Olfr1015	NM_146571.2	mouse	genbank	58_37k	1	validated	missense	c.314	p.C105Y	-	HMMPfam_7tm_1,superfamily_SSF81321	HMMPfam_7tm_1,PatternScan_G_PROTEIN_RECEP_F1_1,superfamily_SSF81321	-	no_errors	Unknown	Unknown	Unknown	107	0	0	46	43	48.31	Somatic	1	40.407	0	0	0
2	85640350	85640350	G	T	SNP	Olfr1016	ENSMUST00000099915	mouse	ensembl	58_37k	-1	known	missense	c.76	p.L26M	-	superfamily_SSF81321	HMMPfam_7tm_1,PatternScan_G_PROTEIN_RECEP_F1_1,PatternScan_RIBOSOMAL_S2_1,superfamily_SSF81321	-	no_errors	Unknown	Unknown	Unknown	107	0	0	63	6	8.7	Somatic	0.990688	4.7082	0	0	0
2	85744262	85744262	T	C	SNP	Olfr1024	NM_001005230.2	mouse	genbank	58_37k	-1	validated	silent	c.948	p.K316	-	superfamily_SSF81321	HMMPfam_7tm_1,PatternScan_G_PROTEIN_RECEP_F1_1,superfamily_SSF81321	-	no_errors	Unknown	Unknown	Unknown	86	0	0	45	5	10	Somatic	0.985964	4.30455	0	0	0
2	85758401	85758401	C	A	SNP	Olfr1025-ps1	ENSMUST00000077055	mouse	ensembl	58_37k	1	known	silent	c.318	p.A106	-	HMMPfam_7tm_1,superfamily_SSF81321	HMMPfam_7tm_1,PatternScan_G_PROTEIN_RECEP_F1_1,PatternScan_LECTIN_LEGUME_ALPHA,superfamily_SSF81321	-	no_errors	Unknown	Unknown	Unknown	112	0	0	37	37	50	Somatic	1	40.3784	0	0	0
2	85823979	85823979	T	A	SNP	Olfr1031	NM_001011759.2	mouse	genbank	58_37k	1	validated	5_prime_flanking_region	c.-7997	NULL	-	-	-	-	no_errors	Unknown	Unknown	Unknown	60	0	0	19	16	45.71	Somatic	1	18.3361	0	0	0
2	85832669	85832669	G	T	SNP	Olfr1031	NM_001011759.2	mouse	genbank	58_37k	1	validated	missense	c.694	p.G232C	-	HMMPfam_7tm_1,superfamily_SSF81321	HMMPfam_7tm_1,PatternScan_G_PROTEIN_RECEP_F1_1,superfamily_SSF81321	-	no_errors	Unknown	Unknown	Unknown	181	0	0	87	75	46.3	Somatic	1	66.4813	0	0	0
2	85962534	85962534	C	A	SNP	Olfr1038	NM_147013.2	mouse	genbank	58_37k	1	validated	nonsense	c.453	p.Y151*	-	HMMPfam_7tm_1,superfamily_Family A G protein-coupled receptor-like	HMMPfam_7tm_1,PatternScan_G_PROTEIN_RECEP_F1_1,superfamily_Family A G protein-coupled receptor-like	-	pseudogene:no_stop_codon:bad_bp_length_for_coding_region	Unknown	Unknown	Unknown	304	0	0	128	122	48.8	Somatic	1	115.789	0	0	0
2	85971446	85971446	C	T	SNP	Olfr1039	NM_001011784.2	mouse	genbank	58_37k	-1	validated	missense	c.373	p.A125T	-	HMMPfam_7tm_1,PatternScan_G_PROTEIN_RECEP_F1_1,superfamily_SSF81321	HMMPfam_7tm_1,PatternScan_G_PROTEIN_RECEP_F1_1,superfamily_SSF81321	-	no_errors	Unknown	Unknown	Unknown	130	0	0	53	46	46.46	Somatic	1	45.1884	0	0	0
2	85971625	85971625	T	A	SNP	Olfr1039	NM_001011784.2	mouse	genbank	58_37k	-1	validated	missense	c.194	p.H65L	-	HMMPfam_7tm_1,superfamily_SSF81321	HMMPfam_7tm_1,PatternScan_G_PROTEIN_RECEP_F1_1,superfamily_SSF81321	-	no_errors	Unknown	Unknown	Unknown	78	0	0	30	30	50	Somatic	1	29.8822	0	0	0
2	86225666	86225666	C	G	SNP	Olfr1058	NM_146391.2	mouse	genbank	58_37k	-1	validated	missense	c.908	p.R303T	-	superfamily_SSF81321	HMMPfam_7tm_1,PatternScan_G_PROTEIN_RECEP_F1_1,superfamily_SSF81321	-	no_errors	Unknown	Unknown	Unknown	109	0	0	24	30	55.56	Somatic	1	39.6375	0	0	0
2	86263432	86263432	C	A	SNP	Olfr1062	NM_147078.2	mouse	genbank	58_37k	-1	validated	missense	c.400	p.V134L	-	HMMPfam_7tm_1,superfamily_SSF81321	HMMPfam_7tm_1,PatternScan_G_PROTEIN_RECEP_F1_1,superfamily_SSF81321	-	no_errors	Unknown	Unknown	Unknown	100	0	0	42	38	47.5	Somatic	1	36.4198	0	0	0
2	86295581	86295581	G	T	SNP	Olfr1066	NM_001011735.2	mouse	genbank	58_37k	-1	validated	silent	c.846	p.I282	-	HMMPfam_7tm_1,superfamily_SSF81321	HMMPfam_7tm_1,superfamily_SSF81321	-	no_errors	Unknown	Unknown	Unknown	60	0	0	20	14	41.18	Somatic	1	15.9229	0	0	0
2	86447399	86447399	A	C	SNP	Olfr1083	NM_207564.2	mouse	genbank	58_37k	-1	validated	missense	c.328	p.L110V	-	NULL	NULL	-	pseudogene:no_stop_codon:bad_bp_length_for_coding_region	Unknown	Unknown	Unknown	283	0	0	137	23	14.37	Somatic	1	21.7098	0	0	0
2	86516605	86516605	A	G	SNP	Olfr1086	NM_146592.1	mouse	genbank	58_37k	-1	provisional	missense	c.884	p.V295A	-	superfamily_Family A G protein-coupled receptor-like	HMMPfam_7tm_1,PatternScan_G_PROTEIN_RECEP_F1_1,superfamily_Family A G protein-coupled receptor-like	-	no_errors	Unknown	Unknown	Unknown	37	0	0	8	9	52.94	Somatic	0.999995	12.2044	0	0	0
2	86530738	86530738	G	T	SNP	Olfr1087	NM_146846.2	mouse	genbank	58_37k	-1	validated	silent	c.393	p.L131	-	HMMPfam_7tm_1,superfamily_SSF81321	HMMPfam_7tm_1,PatternScan_G_PROTEIN_RECEP_F1_1,superfamily_SSF81321	-	no_errors	Unknown	Unknown	Unknown	123	0	0	34	32	48.48	Somatic	1	39.0024	0	0	0
2	86911820	86911820	A	C	SNP	Olfr1107	NM_146844.2	mouse	genbank	58_37k	-1	validated	missense	c.470	p.L157R	-	HMMPfam_7tm_1,superfamily_SSF81321	HMMPfam_7tm_1,PatternScan_G_PROTEIN_RECEP_F1_1,superfamily_SSF81321	-	no_errors	Unknown	Unknown	Unknown	84	0	0	32	46	58.97	Somatic	1	43.0102	0	0	0
2	87108963	87108963	A	T	SNP	Olfr1118	NM_207632.2	mouse	genbank	58_37k	1	validated	5_prime_flanking_region	c.-39985	NULL	-	-	-	-	no_errors	Unknown	Unknown	Unknown	132	0	0	47	29	38.16	Somatic	1	32.1604	0	0	0
2	87258446	87258446	T	C	SNP	Olfr1123	NM_146350.2	mouse	genbank	58_37k	1	validated	silent	c.240	p.S80	-	HMMPfam_7tm_1,superfamily_SSF81321	HMMPfam_7tm_1,PatternScan_G_PROTEIN_RECEP_F1_1,superfamily_SSF81321	-	no_errors	Unknown	Unknown	Unknown	153	0	0	65	41	38.68	Somatic	1	40.8715	0	0	0
2	87298012	87298012	C	A	SNP	Olfr1126	NM_146837.2	mouse	genbank	58_37k	1	validated	missense	c.689	p.T230N	-	HMMPfam_7tm_1,superfamily_SSF81321	HMMPfam_7tm_1,PatternScan_G_PROTEIN_RECEP_F1_1,superfamily_SSF81321	-	no_errors	Unknown	Unknown	Unknown	230	0	0	87	50	36.5	Somatic	1	53.881	0	0	0
2	87448436	87448436	G	T	SNP	Olfr1130	NM_146838.2	mouse	genbank	58_37k	1	validated	missense	c.890	p.S297I	-	superfamily_SSF81321	HMMPfam_7tm_1,PatternScan_G_PROTEIN_RECEP_F1_1,superfamily_SSF81321	-	no_errors	Unknown	Unknown	Unknown	194	0	0	63	57	47.5	Somatic	1	63.7656	0	0	0
2	87736316	87736316	C	A	SNP	Olfr1153	NM_146640.2	mouse	genbank	58_37k	1	validated	5_prime_flanking_region	c.-18	NULL	-	-	-	-	no_errors	Unknown	Unknown	Unknown	53	0	0	17	15	46.88	Somatic	1	16.9591	0	0	0
2	87743417	87743417	T	A	SNP	Olfr1154	NM_146647.2	mouse	genbank	58_37k	-1	validated	nonsense	c.415	p.R139*	-	HMMPfam_7tm_1,superfamily_SSF81321	HMMPfam_7tm_1,PatternScan_G_PROTEIN_RECEP_F1_1,superfamily_SSF81321	-	no_errors	Unknown	Unknown	Unknown	174	0	0	107	11	9.32	Somatic	0.999804	8.53759	0	0	0
2	87875063	87875063	C	A	SNP	Olfr73	NM_054090.1	mouse	genbank	58_37k	-1	provisional	missense	c.232	p.V78F	-	HMMPfam_7tm_1,superfamily_SSF81321	HMMPfam_7tm_1,PatternScan_G_PROTEIN_RECEP_F1_1,superfamily_SSF81321	-	no_errors	Unknown	Unknown	Unknown	77	0	0	47	4	7.84	Somatic	0.945894	3.00491	0	0	0
2	87890638	87890638	T	C	SNP	Olfr1162	NM_001011835.1	mouse	genbank	58_37k	-1	provisional	missense	c.142	p.I48V	-	HMMPfam_7tm_1,superfamily_SSF81321	HMMPfam_7tm_1,PatternScan_G_PROTEIN_RECEP_F1_1,superfamily_SSF81321	-	no_errors	Unknown	Unknown	Unknown	47	1	2.08	20	19	48.72	Somatic	1	14.8075	0	0	0
2	87964857	87964857	G	T	SNP	Olfr1166	NM_146650.2	mouse	genbank	58_37k	-1	provisional	missense	c.284	p.S95Y	-	HMMPfam_7tm_1,superfamily_SSF81321	HMMPfam_7tm_1,PatternScan_G_PROTEIN_RECEP_F1_1,superfamily_SSF81321	-	no_errors	Unknown	Unknown	Unknown	178	0	0	136	10	6.85	Somatic	0.998285	6.37704	0	0	0
2	88523998	88523998	C	G	SNP	Olfr1195	NM_146753.2	mouse	genbank	58_37k	-1	validated	5_prime_flanking_region	c.-111	NULL	-	-	-	-	no_errors	Unknown	Unknown	Unknown	21	0	0	10	9	47.37	Somatic	0.999655	7.97203	0	0	0
2	88657495	88657495	C	G	SNP	Olfr1202	NM_146462.1	mouse	genbank	58_37k	1	provisional	missense	c.166	p.P56A	-	HMMPfam_7tm_1,superfamily_SSF81321	HMMPfam_7tm_1,PatternScan_G_PROTEIN_RECEP_F1_1,PatternScan_LECTIN_LEGUME_ALPHA,superfamily_SSF81321	-	no_errors	Unknown	Unknown	Unknown	440	0	0	132	160	54.24	Somatic	1	178.899	0	0	0
2	88937520	88937520	C	A	SNP	Olfr1220	NM_146900.2	mouse	genbank	58_37k	-1	validated	missense	c.563	p.C188F	-	HMMPfam_7tm_1,superfamily_SSF81321	HMMPfam_7tm_1,PatternScan_G_PROTEIN_RECEP_F1_1,superfamily_SSF81321	-	no_errors	Unknown	Unknown	Unknown	103	0	0	25	22	46.81	Somatic	1	29.0152	0	0	0
2	89143213	89143213	T	G	SNP	Olfr1231	NM_146454.2	mouse	genbank	58_37k	-1	validated	missense	c.535	p.M179L	-	HMMPfam_7tm_1,superfamily_SSF81321	HMMPfam_7tm_1,PatternScan_G_PROTEIN_RECEP_F1_1,PatternScan_LECTIN_LEGUME_ALPHA,superfamily_SSF81321	-	no_errors	Unknown	Unknown	Unknown	57	0	0	20	26	55.32	Somatic	1	26.1283	0	0	0
2	89817950	89817950	A	C	SNP	Olfr1260	NM_146981.1	mouse	genbank	58_37k	1	provisional	missense	c.14	p.N5T	-	NULL	HMMPfam_7tm_1,PatternScan_G_PROTEIN_RECEP_F1_1,superfamily_SSF81321	-	no_errors	Unknown	Unknown	Unknown	165	0	0	97	61	38.61	Somatic	1	49.4741	0	0	0
2	90975997	90975997	C	A	SNP	Mybpc3	NM_008653.2	mouse	genbank	58_37k	1	validated	nonsense	c.3744	p.C1248*	-	HMMSmart_IGc2,HMMPfam_I-set,superfamily_SSF48726	HMMSmart_IGc2,HMMSmart_IG,HMMPfam_fn3,HMMSmart_FN3,superfamily_FN_III-like,HMMPfam_I-set,HMMPfam_ig,superfamily_SSF48726	-	no_errors	Unknown	Unknown	Unknown	48	0	0	28	29	50.88	Somatic	1	21.8955	0	0	0
2	90980975	90980975	C	A	SNP	Madd	ENSMUST00000066473	mouse	ensembl	58_37k	-1	known	splice_site	c.4654-1	e32-1	-	-	-	-	no_errors	Unknown	Unknown	Unknown	25	0	0	15	10	40	Somatic	0.999645	7.94357	0	1	100
2	91395715	91395715	G	T	SNP	Ckap5	NM_029437.2	mouse	genbank	58_37k	1	validated	intronic	c.630+120	e4+120	-	-	-	-	no_errors	Unknown	Unknown	Unknown	13	0	0	12	8	40	Somatic	0.990773	4.68643	1	2	66.67
2	91773772	91773772	C	A	SNP	Dgkz	NM_138306.2	mouse	genbank	58_37k	-1	validated	intronic	c.2674-90	e31-90	-	-	-	-	no_errors	Unknown	Unknown	Unknown	20	0	0	10	11	52.38	Somatic	0.999888	9.11041	0	2	100
2	91832172	91832172	G	T	SNP	Creb3l1	NM_011957.2	mouse	genbank	58_37k	-1	validated	missense	c.625	p.P209T	-	NULL	HMMSmart_SM00338,PatternScan_BZIP_BASIC,superfamily_A DNA-binding domain in eukaryotic transcription factors,HMMPfam_bZIP_1	-	no_errors	Unknown	Unknown	Unknown	44	0	0	27	17	38.64	Somatic	0.999998	13.3964	0	1	100
2	92853772	92853772	T	G	SNP	Prdm11	ENSMUST00000099700	mouse	ensembl	58_37k	-1	known	intronic	c.119+150	e1+150	-	-	-	-	no_errors	Unknown	Unknown	Unknown	8	0	0	7	6	46.15	Somatic	0.967169	3.51084	0	0	0
2	92854067	92854067	C	T	SNP	Prdm11	ENSMUST00000099700	mouse	ensembl	58_37k	-1	known	5_prime_untranslated_region	c.-27	NULL	-	-	-	-	no_errors	Unknown	Unknown	Unknown	10	0	0	10	7	41.18	Somatic	0.978036	3.83367	0	0	0
2	93037800	93037800	G	T	SNP	Trp53i11	NM_001025246.1	mouse	genbank	58_37k	1	provisional	silent	c.24	p.P8	-	NULL	NULL	-	no_errors	Unknown	Unknown	Unknown	14	0	0	11	14	56	Somatic	0.999659	8.17126	1	3	75
2	93044484	93044484	G	T	SNP	Tspan18	NM_183180.2	mouse	genbank	58_37k	-1	validated	3_prime_untranslated_region	c.*48	NULL	-	-	-	-	no_errors	Unknown	Unknown	Unknown	15	0	0	10	7	41.18	Somatic	0.994162	5.14212	0	0	0
2	93821655	93821655	C	A	SNP	Alkbh3	NM_026944.1	mouse	genbank	58_37k	-1	provisional	intronic	c.768+18	e8+18	-	-	-	-	no_errors	Unknown	Unknown	Unknown	126	0	0	54	78	59.09	Somatic	1	67.5403	2	2	50
2	93836415	93836415	C	A	SNP	Alkbh3	NM_026944.1	mouse	genbank	58_37k	-1	provisional	silent	c.594	p.L198	-	HMMPfam_2OG-FeII_Oxy	HMMPfam_2OG-FeII_Oxy	-	no_errors	Unknown	Unknown	Unknown	25	0	0	25	10	28.57	Somatic	0.997108	5.84298	154	170	52.47
2	101537694	101537694	G	T	SNP	Traf6	NM_009424.2	mouse	genbank	58_37k	1	provisional	3_prime_untranslated_region	c.*38	NULL	-	-	-	-	no_errors	Unknown	Unknown	Unknown	29	0	0	16	18	52.94	Somatic	0.999999	13.8914	43	23	34.85
2	101611213	101611213	C	A	SNP	Prr5l	NM_001083810.2	mouse	genbank	58_37k	-1	validated	intronic	c.165-41	e2-41	-	-	-	-	no_errors	Unknown	Unknown	Unknown	21	0	0	7	12	63.16	Somatic	0.999992	11.7194	0	0	0
2	101726392	101726392	C	A	SNP	Commd9	NM_029635.3	mouse	genbank	58_37k	1	provisional	5_prime_flanking_region	c.-34	NULL	-	-	-	-	no_errors	Unknown	Unknown	Unknown	17	0	0	10	5	33.33	Somatic	0.984478	4.1502	0	0	0
2	102576128	102576128	A	C	SNP	Slc1a2	NM_001077514.3	mouse	genbank	58_37k	1	validated	missense	c.45	p.E15D	-	NULL	HMMPfam_SDF,PatternScan_NA_DICARBOXYL_SYMP_1,PatternScan_NA_DICARBOXYL_SYMP_2	-	no_errors	Unknown	Unknown	Unknown	57	0	0	50	5	9.09	Somatic	0.956017	3.10414	0	0	0
2	103130861	103130861	G	T	SNP	Ehf	ENSMUST00000111172	mouse	ensembl	58_37k	-1	known	splice_region	c.114+7	e1+7	-	-	-	-	no_stop_codon	Unknown	Unknown	Unknown	37	0	0	19	16	45.71	Somatic	0.999999	13.6356	0	0	0
2	103551364	103551364	C	A	SNP	Abtb2	NM_178890.3	mouse	genbank	58_37k	1	provisional	silent	c.2454	p.P818	-	superfamily_POZ domain	HMMSmart_SM00225,HMMPfam_Ank,HMMSmart_SM00248,superfamily_Ankyrin repeat,superfamily_Histone-fold,superfamily_POZ domain,HMMPfam_BTB,PatternScan_EF_HAND_1	-	no_errors	Unknown	Unknown	Unknown	33	0	0	19	11	36.67	Somatic	0.999892	9.12957	6	1	14.29
2	104563295	104563295	C	A	SNP	Depdc7	NM_144804.1	mouse	genbank	58_37k	-1	provisional	missense	c.1164	p.R388S	-	NULL	HMMPfam_DEP,HMMSmart_DEP,superfamily_SSF46785	-	no_errors	Unknown	Unknown	Unknown	187	0	0	80	65	44.83	Somatic	1	62.5657	89	80	47.34
2	105010166	105010166	G	T	SNP	Wt1	NM_144783.2	mouse	genbank	58_37k	1	reviewed	missense	c.1219	p.G407C	-	superfamily_C2H2 and C2HC zinc fingers	HMMPfam_WT1,HMMPfam_zf-C2H2,PatternScan_ZINC_FINGER_C2H2_1,HMMSmart_SM00355,superfamily_C2H2 and C2HC zinc fingers	-	no_errors	Unknown	Unknown	Unknown	144	0	0	44	57	56.44	Somatic	1	62.2871	0	0	0
2	105843336	105843336	C	G	SNP	Dnajc24	ENSMUST00000028587	mouse	ensembl	58_37k	-1	known	missense	c.20	p.R7T	-	NULL	HMMPfam_DnaJ,HMMSmart_SM00271,superfamily_Chaperone J-domain,HMMPfam_zf-CSL	-	no_errors	Unknown	Unknown	Unknown	82	0	0	45	53	54.08	Somatic	1	40.6693	30	47	61.04
2	106191888	106191888	T	-	DEL	Dcdc5	ENSMUST00000099638	mouse	ensembl	58_37k	1	known	intronic	c.620+64	e5+64	-	-	-	-	no_errors	Unknown	Unknown	Unknown	17	0	0	4	7	63.64	Somatic	0.999761	8.36423	0	0	0
2	107136812	107136812	C	A	SNP	Kcna4	NM_021275.4	mouse	genbank	58_37k	1	validated	missense	c.1733	p.T578N	-	NULL	HMMSmart_BTB,HMMPfam_K_tetra,HMMPfam_Ion_trans,superfamily_BTB/POZ_fold,HMMPfam_K_channel_TID,superfamily_SSF81324	-	no_errors	Unknown	Unknown	Unknown	185	0	0	82	75	47.77	Somatic	1	69.371	0	0	0
2	109758502	109758502	G	T	SNP	Lgr4	NM_172671.2	mouse	genbank	58_37k	1	validated	intronic	c.185+40	e1+40	-	-	-	-	no_errors	Unknown	Unknown	Unknown	22	0	0	6	4	40	Somatic	0.993965	5.10542	0	0	0
2	109841108	109841108	G	T	SNP	Lgr4	NM_172671.2	mouse	genbank	58_37k	1	validated	silent	c.924	p.L308	-	superfamily_SSF52058	HMMPfam_7tm_1,PatternScan_G_PROTEIN_RECEP_F1_1,HMMPfam_LRRNT,HMMSmart_LRRNT,HMMPfam_LRR_1,HMMSmart_LRR_TYP,superfamily_SSF52058,superfamily_SSF81321	-	no_errors	Unknown	Unknown	Unknown	86	0	0	41	49	54.44	Somatic	1	41.2027	44	27	38.03
2	110897627	110897628	-	T	INS	LOC668802	XM_001003702.2	mouse	genbank	58_37k	-1	model	frame_shift_ins	c.2214_2213	p.S739fs	-	NULL	NULL	-	no_errors	Unknown	Unknown	Unknown	40	0	0	16	14	46.67	Somatic	0.999999	13.8985	0	0	0
2	110897636	110897636	G	T	SNP	LOC668802	XM_001003702.2	mouse	genbank	58_37k	-1	model	silent	c.2205	p.P735	-	NULL	NULL	-	no_errors	Unknown	Unknown	Unknown	40	0	0	13	15	50	Somatic	1	16.1417	0	0	0
2	111060888	111060888	C	A	SNP	4930430A15Rik	NM_026248.3	mouse	genbank	58_37k	-1	validated	missense	c.719	p.R240I	-	HMMPfam_Ank,superfamily_ANK	HMMPfam_Ank,HMMSmart_ANK,superfamily_ANK	-	no_errors	Unknown	Unknown	Unknown	119	0	0	38	26	40.62	Somatic	1	30.3691	0	0	0
2	111060996	111060996	A	T	SNP	4930430A15Rik	NM_026248.3	mouse	genbank	58_37k	-1	validated	intronic	c.636-25	e5-25	-	-	-	-	no_errors	Unknown	Unknown	Unknown	56	0	0	18	9	33.33	Somatic	0.999978	10.7392	0	0	0
2	111168923	111168923	G	T	SNP	Olfr1281	NM_001005568.1	mouse	genbank	58_37k	1	provisional	missense	c.346	p.V116L	-	HMMPfam_7tm_1,PatternScan_G_PROTEIN_RECEP_F1_1,superfamily_SSF81321	HMMPfam_7tm_1,PatternScan_G_PROTEIN_RECEP_F1_1,superfamily_SSF81321	-	no_errors	Unknown	Unknown	Unknown	460	0	0	152	145	48.82	Somatic	1	159.356	0	0	0
2	111260086	111260086	G	T	SNP	Olfr1287	NM_001011773.1	mouse	genbank	58_37k	1	provisional	5_prime_flanking_region	c.-29213	NULL	-	-	-	-	no_errors	Unknown	Unknown	Unknown	80	0	0	33	26	44.07	Somatic	1	25.7031	0	0	0
2	111404629	111404629	C	T	SNP	Olfr1294	NM_146885.1	mouse	genbank	58_37k	-1	provisional	5_prime_flanking_region	c.-26185	NULL	-	-	-	-	no_errors	Unknown	Unknown	Unknown	39	0	0	17	9	34.62	Somatic	0.999874	8.97763	0	0	0
2	111594846	111594846	A	C	SNP	Olfr1301	NM_146887.1	mouse	genbank	58_37k	1	provisional	missense	c.439	p.T147P	-	HMMPfam_7tm_1,superfamily_SSF81321	HMMPfam_7tm_1,PatternScan_G_PROTEIN_RECEP_F1_1,superfamily_SSF81321	-	no_errors	Unknown	Unknown	Unknown	148	0	0	105	23	17.97	Somatic	1	17.4016	0	0	0
2	111654646	111654646	G	T	SNP	Olfr1303	NM_146402.2	mouse	genbank	58_37k	-1	validated	missense	c.236	p.P79H	-	HMMPfam_7tm_1,superfamily_SSF81321	HMMPfam_7tm_1,PatternScan_G_PROTEIN_RECEP_F1_1,superfamily_SSF81321	-	no_errors	Unknown	Unknown	Unknown	176	0	0	104	46	30.67	Somatic	1	38.44	0	0	0
2	111713209	111713209	C	A	SNP	Olfr1305	NM_146401.2	mouse	genbank	58_37k	-1	provisional	missense	c.802	p.D268Y	-	HMMPfam_7tm_1,superfamily_SSF81321	HMMPfam_7tm_1,PatternScan_G_PROTEIN_RECEP_F1_1,PatternScan_LECTIN_LEGUME_ALPHA,superfamily_SSF81321	-	no_errors	Unknown	Unknown	Unknown	33	0	0	6	16	72.73	Somatic	1	19.9404	0	0	0
2	111970617	111970617	G	T	SNP	Olfr1316	NM_146742.1	mouse	genbank	58_37k	-1	provisional	missense	c.356	p.A119D	-	HMMPfam_7tm_1,PatternScan_G_PROTEIN_RECEP_F1_1,superfamily_SSF81321	HMMPfam_7tm_1,PatternScan_G_PROTEIN_RECEP_F1_1,superfamily_SSF81321	-	no_errors	Unknown	Unknown	Unknown	141	1	0.7	78	31	28.44	Somatic	1	24.6761	0	0	0
2	112083103	112083103	G	T	SNP	Lpcat4	NM_207206.2	mouse	genbank	58_37k	1	validated	intronic	c.653-58	e6-58	-	-	-	-	no_errors	Unknown	Unknown	Unknown	42	0	0	21	24	53.33	Somatic	1	19.7296	6	2	25
2	112091258	112091258	G	T	SNP	Nut	NM_172521.1	mouse	genbank	58_37k	-1	provisional	missense	c.1216	p.P406T	-	NULL	NULL	-	no_errors	Unknown	Unknown	Unknown	194	0	0	105	113	51.83	Somatic	1	89.1251	0	0	0
2	112319537	112319537	C	T	SNP	Chrm5	NM_205783.2	mouse	genbank	58_37k	-1	validated	missense	c.1390	p.V464I	-	HMMPfam_7tm_1,superfamily_SSF81321	HMMPfam_7tm_1,PatternScan_G_PROTEIN_RECEP_F1_1,superfamily_SSF81321	-	no_errors	Unknown	Unknown	Unknown	60	0	0	38	29	42.65	Somatic	1	21.7958	0	0	0
2	112320326	112320326	C	A	SNP	Chrm5	NM_205783.2	mouse	genbank	58_37k	-1	validated	missense	c.601	p.A201S	-	HMMPfam_7tm_1,superfamily_SSF81321	HMMPfam_7tm_1,PatternScan_G_PROTEIN_RECEP_F1_1,superfamily_SSF81321	-	no_errors	Unknown	Unknown	Unknown	155	0	0	71	62	46.62	Somatic	1	56.5677	0	0	0
2	112621155	112621155	G	A	SNP	Ryr3	NM_177652.2	mouse	genbank	58_37k	-1	provisional	nonsense	c.6838	p.Q2280*	-	NULL	HMMPfam_RYDR_ITPR,HMMPfam_RyR,HMMPfam_MIR,superfamily_MIR domain (Pfam 02815),HMMPfam_SPRY,HMMPfam_Ion_trans,HMMPfam_RR_TM4-6,HMMPfam_RIH_assoc,HMMPfam_Ins145_P3_rec,HMMSmart_SM00472,HMMPfam_efhand,HMMSmart_SM00449,superfamily_EF-hand	-	no_errors	Unknown	Unknown	Unknown	14	0	0	10	11	52.38	Somatic	0.999119	7.11407	0	0	0
2	112684685	112684685	A	T	SNP	Ryr3	NM_177652.2	mouse	genbank	58_37k	-1	provisional	intronic	c.4202+96	e31+96	-	-	-	-	no_errors	Unknown	Unknown	Unknown	20	0	0	12	6	33.33	Somatic	0.992724	4.91591	0	0	0
2	113130064	113130064	C	A	SNP	Tmco5b	NM_029232.2	mouse	genbank	58_37k	1	validated	intronic	c.423+104	e5+104	-	-	-	-	no_errors	Unknown	Unknown	Unknown	12	0	0	7	4	36.36	Somatic	0.964109	3.29595	0	0	0
2	113205941	113205941	G	T	SNP	Fmn1	NM_010230.2	mouse	genbank	58_37k	1	validated	missense	c.1828	p.G610W	-	NULL	HMMSmart_SM00498,HMMPfam_FH2,superfamily_Formin homology 2 domain (FH2 domain)	-	no_errors	Unknown	Unknown	Unknown	36	0	0	12	9	42.86	Somatic	0.999961	10.1584	0	0	0
2	113995697	113995697	C	A	SNP	Aqr	NM_009702.2	mouse	genbank	58_37k	-1	validated	intronic	c.173+66	e3+66	-	-	-	-	no_errors	Unknown	Unknown	Unknown	179	0	0	54	50	48.08	Somatic	1	58.159	0	2	100
2	114395245	114395245	G	T	SNP	Atpbd4	NM_025675.4	mouse	genbank	58_37k	-1	provisional	silent	c.354	p.L118	-	HMMPfam_ATP_bind_4,superfamily_Adenine nucleotide alpha hydrolases-like	HMMPfam_ATP_bind_4,superfamily_Adenine nucleotide alpha hydrolases-like	-	no_errors	Unknown	Unknown	Unknown	194	0	0	53	56	51.38	Somatic	1	67.5609	76	62	44.93
2	115338011	115338011	G	T	SNP	ENSMUSG00000085582	ENSMUST00000143695	mouse	ensembl	58_37k	-1	novel	intronic	c.NULL	NULL	-	-	-	-	no_coding_region	Unknown	Unknown	Unknown	39	0	0	16	11	40.74	Somatic	0.999985	11.0957	0	0	0
2	117944772	117944772	T	G	SNP	Thbs1	NM_011580.3	mouse	genbank	58_37k	1	provisional	intronic	c.1649-43	e10-43	-	-	-	-	no_errors	Unknown	Unknown	Unknown	46	0	0	29	28	49.12	Somatic	1	20.3008	3	1	25
2	117949027	117949027	G	T	SNP	Thbs1	NM_011580.3	mouse	genbank	58_37k	1	provisional	missense	c.3022	p.D1008Y	-	HMMPfam_TSP_C,superfamily_ConA_like_lec_gl	HMMPfam_TSP_1,HMMSmart_TSP1,superfamily_TSP1,HMMPfam_VWC,HMMSmart_VWC,PatternScan_VWFC_1,HMMSmart_TSPN,HMMPfam_TSP_3,HMMPfam_EGF,HMMSmart_EGF,HMMPfam_TSP_C,superfamily_ConA_like_lec_gl,PatternScan_EGF_2,superfamily_SSF103647,superfamily_SSF57196	-	no_errors	Unknown	Unknown	Unknown	65	0	0	39	37	48.68	Somatic	1	27.8484	178	142	44.38
2	118079183	118079183	T	G	SNP	Fsip1	NM_027759.3	mouse	genbank	58_37k	-1	validated	intronic	c.1-29	e1-29	-	-	-	-	no_errors	Unknown	Unknown	Unknown	25	0	0	21	8	27.59	Somatic	0.99513	5.31977	0	0	0
2	118238846	118238846	A	T	SNP	Eif2ak4	NM_013719.3	mouse	genbank	58_37k	1	validated	intronic	c.743+27	e6+27	-	-	-	-	no_errors	Unknown	Unknown	Unknown	55	0	0	32	24	42.86	Somatic	1	19.1549	0	0	0
2	118287495	118287495	G	T	SNP	Eif2ak4	NM_013719.3	mouse	genbank	58_37k	1	validated	missense	c.3789	p.K1263N	-	superfamily_SSF55681	HMMPfam_tRNA-synt_2b,HMMPfam_RWD,HMMSmart_RWD,PatternScan_PROTEIN_KINASE_ST,superfamily_Kinase_like,superfamily_UBQ-conjugat/RWD-like,PatternScan_PROTEIN_KINASE_ATP,HMMPfam_Pkinase,superfamily_SSF55681	-	no_errors	Unknown	Unknown	Unknown	74	0	0	41	23	35.94	Somatic	1	19.638	56	51	47.66
2	118514772	118514772	C	A	SNP	Pak6	NM_001033254.3	mouse	genbank	58_37k	1	validated	intronic	c.204+31	e1+31	-	-	-	-	no_errors	Unknown	Unknown	Unknown	11	0	0	3	6	66.67	Somatic	0.997978	6.3781	0	0	0
2	118549381	118549381	C	T	SNP	Plcb2	NM_177568.2	mouse	genbank	58_37k	-1	validated	intronic	c.372+23	e4+23	-	-	-	-	no_errors	Unknown	Unknown	Unknown	42	0	0	24	20	45.45	Somatic	1	15.9035	0	0	0
2	118611956	118611956	G	A	SNP	Disp2	NM_170593.2	mouse	genbank	58_37k	1	provisional	silent	c.159	p.A53	-	NULL	superfamily_Multidrug efflux transporter AcrB transmembrane domain	-	no_errors	Unknown	Unknown	Unknown	88	0	0	55	52	48.6	Somatic	1	38.0743	0	1	100
2	119096684	119096684	C	A	SNP	Rhov	NM_145530.2	mouse	genbank	58_37k	-1	validated	missense	c.176	p.R59L	-	HMMSmart_RHO,HMMPfam_Ras,superfamily_SSF52540	HMMSmart_RHO,HMMPfam_Ras,superfamily_SSF52540	-	no_errors	Unknown	Unknown	Unknown	65	0	0	29	29	50	Somatic	1	26.3216	0	3	100
2	119152004	119152004	G	T	SNP	Dll4	NM_019454.3	mouse	genbank	58_37k	1	validated	intronic	c.67-47	e2-47	-	-	-	-	no_errors	Unknown	Unknown	Unknown	85	0	0	64	56	46.67	Somatic	1	36.4443	0	0	0
2	119228657	119228657	C	A	SNP	Ino80	ENSMUST00000110808	mouse	ensembl	58_37k	-1	known	3_prime_untranslated_region	c.*12	NULL	-	-	-	-	no_errors	Unknown	Unknown	Unknown	158	1	0.63	82	84	50.6	Somatic	1	65.521	3	0	0
2	119469729	119469750	GTGTATGTGTGTGTGTGTGTGT	-	DEL	Nusap1	NM_133851.3	mouse	genbank	58_37k	1	validated	intronic	c.1078+93_1078+72	e9+93	-	-	-	-	no_errors	Unknown	Unknown	Unknown	NA	NA	NA	NA	NA	NA	Somatic	NA	NA	NA	NA	NA
2	119558398	119558398	A	G	SNP	Rtf1	ENSMUST00000028767	mouse	ensembl	58_37k	1	known	intronic	c.2042-123	e18-123	-	-	-	-	no_errors	Unknown	Unknown	Unknown	29	0	0	12	15	55.56	Somatic	0.999999	13.7031	1	0	0
2	119576629	119576629	G	T	SNP	Itpka	NM_146125.2	mouse	genbank	58_37k	1	provisional	3_prime_untranslated_region	c.*26	NULL	-	-	-	-	no_errors	Unknown	Unknown	Unknown	12	0	0	3	5	62.5	Somatic	0.996868	5.83359	0	0	0
2	119628032	119628032	G	T	SNP	Tyro3	NM_019392.2	mouse	genbank	58_37k	1	provisional	missense	c.296	p.R99L	-	HMMSmart_IGc2,HMMPfam_ig,superfamily_SSF48726	HMMPfam_Pkinase_Tyr,HMMSmart_TyrKc,HMMSmart_IGc2,HMMSmart_IG,HMMPfam_fn3,HMMSmart_FN3,PatternScan_PROTEIN_KINASE_TYR,superfamily_FN_III-like,superfamily_Kinase_like,HMMPfam_ig,PatternScan_PROTEIN_KINASE_ATP,superfamily_SSF48726	-	no_errors	Unknown	Unknown	Unknown	32	0	0	18	21	53.85	Somatic	1	15.8753	65	31	32.29
2	119772565	119772565	T	A	SNP	Mga	NM_013720.2	mouse	genbank	58_37k	1	validated	silent	c.5481	p.S1827	-	NULL	HMMPfam_HLH,HMMSmart_SM00353,HMMPfam_T-box,HMMSmart_SM00425,superfamily_p53-like transcription factors,superfamily_HLH helix-loop-helix DNA-binding domain,PatternScan_TBOX_2	-	no_errors	Unknown	Unknown	Unknown	115	0	0	57	46	44.66	Somatic	1	40.3719	62	40	39.22
2	119772573	119772573	G	T	SNP	Mga	NM_013720.2	mouse	genbank	58_37k	1	validated	missense	c.5489	p.G1830V	-	NULL	HMMPfam_HLH,HMMSmart_SM00353,HMMPfam_T-box,HMMSmart_SM00425,superfamily_p53-like transcription factors,superfamily_HLH helix-loop-helix DNA-binding domain,PatternScan_TBOX_2	-	no_errors	Unknown	Unknown	Unknown	120	0	0	60	48	44.44	Somatic	1	41.943	64	44	40
2	119786616	119786616	T	A	SNP	Mga	NM_013720.2	mouse	genbank	58_37k	1	validated	silent	c.7599	p.S2533	-	NULL	HMMPfam_HLH,HMMSmart_SM00353,HMMPfam_T-box,HMMSmart_SM00425,superfamily_p53-like transcription factors,superfamily_HLH helix-loop-helix DNA-binding domain,PatternScan_TBOX_2	-	no_errors	Unknown	Unknown	Unknown	14	0	0	12	8	40	Somatic	0.992915	4.94928	47	51	52.04
2	119843517	119843517	G	T	SNP	Mapkbp1	NM_011941.3	mouse	genbank	58_37k	1	validated	missense	c.1811	p.R604L	-	HMMSmart_SM00320,superfamily_WD40 repeat-like	HMMSmart_SM00320,PatternScan_PTS_HPR_SER,superfamily_WD40 repeat-like,HMMPfam_WD40	-	no_errors	Unknown	Unknown	Unknown	60	1	1.64	20	22	52.38	Somatic	1	20.4259	30	10	25
2	119853235	119853235	G	T	SNP	Pla2g4b	ENSMUST00000044675	mouse	ensembl	58_37k	1	known	5_prime_untranslated_region	c.-14	NULL	-	-	-	-	no_errors	Unknown	Unknown	Unknown	114	0	0	66	62	48.44	Somatic	1	47.9023	0	0	0
2	119861399	119861410	GGGATGGGGGTA	-	DEL	Pla2g4b	NM_145378.3	mouse	genbank	58_37k	1	validated	intronic	c.386+38_386+27	e4+38	-	-	-	-	no_errors	Unknown	Unknown	Unknown	NA	NA	NA	NA	NA	NA	Somatic	NA	NA	NA	NA	NA
2	119865232	119865232	G	-	DEL	Pla2g4b	NM_145378.3	mouse	genbank	58_37k	1	validated	intronic	c.1352-133	e14-133	-	-	-	-	no_errors	Unknown	Unknown	Unknown	13	0	0	10	7	41.18	Somatic	0.990426	4.65012	1	0	0
2	119867425	119867425	G	A	SNP	Pla2g4b	ENSMUST00000129685	mouse	ensembl	58_37k	1	known	3_prime_untranslated_region	c.*74	NULL	-	-	-	-	no_errors	Unknown	Unknown	Unknown	12	0	0	3	5	62.5	Somatic	0.996868	5.83359	13	2	13.33
2	119877465	119877465	T	A	SNP	Spnb5	ENSMUST00000099515	mouse	ensembl	58_37k	-1	known	intronic	c.1155+38	e9+38	-	-	-	-	no_stop_codon	Unknown	Unknown	Unknown	137	0	0	85	42	33.07	Somatic	1	33.6929	0	0	0
2	119881220	119881220	G	A	SNP	Spnb5	ENSMUST00000099515	mouse	ensembl	58_37k	-1	known	missense	c.701	p.P234L	-	HMMPfam_Spectrin,HMMSmart_SPEC,superfamily_Spectrin	HMMPfam_Spectrin,HMMSmart_SPEC,superfamily_Spectrin	-	no_stop_codon	Unknown	Unknown	Unknown	28	0	0	19	15	44.12	Somatic	0.999977	10.6921	0	0	0
2	119882799	119882800	-	AGACTCCCTGGAGGACTCCTGGGAGCTGGGGGGGGGGCGGTTCTATAGTATACTCCTCCTT	INS	Spnb5	ENSMUST00000099515	mouse	ensembl	58_37k	-1	known	intronic	c.225+121_225+120	e2+121	-	-	-	-	no_stop_codon	Unknown	Unknown	Unknown	NA	NA	NA	NA	NA	NA	Somatic	NA	NA	NA	NA	NA
2	119907349	119907349	C	A	SNP	Spnb5	ENSMUST00000134935	mouse	ensembl	58_37k	-1	known	missense	c.511	p.G171C	-	superfamily_Calponin-homology domain CH-domain	PatternScan_ACTININ_1,HMMPfam_CH,HMMSmart_SM00033,HMMPfam_Spectrin,PatternScan_IG_MHC,superfamily_Calponin-homology domain CH-domain,HMMSmart_SM00150,superfamily_Spectrin repeat	-	pseudogene:no_stop_codon	Unknown	Unknown	Unknown	17	0	0	7	7	50	Somatic	0.998742	6.68402	0	0	0
2	120002466	120002466	C	G	SNP	Pla2g4e	NM_177845.4	mouse	genbank	58_37k	-1	validated	missense	c.1486	p.G496R	-	HMMPfam_PLA2_B,HMMSmart_SM00022,superfamily_FabD/lysophospholipase-like	HMMPfam_C2,HMMSmart_SM00239,HMMPfam_PLA2_B,HMMSmart_SM00022,superfamily_C2 domain (Calcium/lipid-binding domain CaLB),superfamily_FabD/lysophospholipase-like	-	no_errors	Unknown	Unknown	Unknown	86	0	0	46	26	36.11	Somatic	1	22.6934	0	0	0
2	120010850	120010850	G	T	SNP	Pla2g4e	NM_177845.4	mouse	genbank	58_37k	-1	validated	intronic	c.874-28	e9-28	-	-	-	-	no_errors	Unknown	Unknown	Unknown	42	0	0	14	26	65	Somatic	1	24.9008	0	0	0
2	120147447	120147447	C	A	SNP	Vps39	ENSMUST00000145193	mouse	ensembl	58_37k	-1	known	5_prime_untranslated_region	c.-120147447	NULL	-	-	-	-	no_coding_region	Unknown	Unknown	Unknown	20	0	0	4	5	55.56	Somatic	0.999039	6.94744	1	2	66.67
2	120229804	120229804	C	A	SNP	Ganc	NM_172672.2	mouse	genbank	58_37k	1	validated	5_prime_untranslated_region	c.-963	NULL	-	-	-	-	no_errors	Unknown	Unknown	Unknown	24	0	0	11	7	38.89	Somatic	0.998713	6.65389	6	9	56.25
2	120329141	120329141	C	T	SNP	Capn3	NM_007601.3	mouse	genbank	58_37k	1	validated	missense	c.2320	p.H774Y	-	superfamily_SSF47473	PatternScan_THIOL_PROTEASE_CYS,HMMPfam_Peptidase_C2,HMMPfam_Calpain_III,HMMSmart_CysPc,HMMSmart_calpain_III,superfamily_Peptidase_C2,HMMSmart_EFh,PatternScan_EF_HAND_1,HMMPfam_efhand,superfamily_SSF47473,superfamily_SSF54001	-	no_errors	Unknown	Unknown	Unknown	67	0	0	34	40	54.05	Somatic	1	32.37	1	0	0
2	120554334	120554334	C	A	SNP	Stard9	ENSMUST00000129384	mouse	ensembl	58_37k	1	known	3_prime_untranslated_region	c.*120554334	NULL	-	-	-	-	no_coding_region	Unknown	Unknown	Unknown	26	0	0	6	10	62.5	Somatic	0.999995	12.2064	0	1	100
2	120556478	120556478	C	A	SNP	Cdan1	NM_026891.2	mouse	genbank	58_37k	-1	validated	nonsense	c.541	p.E181*	-	NULL	NULL	-	no_errors	Unknown	Unknown	Unknown	101	0	0	54	49	47.57	Somatic	1	40.1786	19	25	55.56
2	120581868	120581868	T	A	SNP	Ttbk2	NM_080788.3	mouse	genbank	58_37k	-1	validated	intronic	c.1188-86	e12-86	-	-	-	-	no_errors	Unknown	Unknown	Unknown	15	0	0	1	8	88.89	Somatic	0.999985	11.7925	0	0	0
2	120581870	120581870	A	T	SNP	Ttbk2	NM_080788.3	mouse	genbank	58_37k	-1	validated	intronic	c.1188-88	e12-88	-	-	-	-	no_errors	Unknown	Unknown	Unknown	15	0	0	1	7	87.5	Somatic	0.999973	10.9687	0	0	0
2	120586033	120586033	G	T	SNP	Ttbk2	NM_080788.3	mouse	genbank	58_37k	-1	validated	missense	c.1087	p.P363T	-	superfamily_Kinase_like	superfamily_Kinase_like,PatternScan_PROTEIN_KINASE_ATP,HMMPfam_Pkinase	-	no_errors	Unknown	Unknown	Unknown	32	0	0	21	18	46.15	Somatic	0.999998	12.9593	29	29	49.15
2	120824672	120824672	G	T	SNP	Tmem62	NM_175285.3	mouse	genbank	58_37k	1	provisional	intronic	c.1297-138	e11-138	-	-	-	-	no_errors	Unknown	Unknown	Unknown	25	0	0	13	9	40.91	Somatic	0.999598	7.81881	0	0	0
2	120832613	120832613	G	T	SNP	Tmem62	NM_175285.3	mouse	genbank	58_37k	1	provisional	missense	c.1664	p.C555F	-	NULL	HMMPfam_Metallophos,superfamily_Metallo-dependent phosphatases	-	no_errors	Unknown	Unknown	Unknown	110	0	0	68	56	45.16	Somatic	1	42.2937	31	14	31.11
2	121033382	121033382	C	G	SNP	Trp53bp1	NM_013735.3	mouse	genbank	58_37k	-1	validated	intronic	c.4642+53	e20+53	-	-	-	-	no_errors	Unknown	Unknown	Unknown	23	0	0	12	14	53.85	Somatic	0.999985	11.1392	4	2	33.33
2	121062508	121062508	T	A	SNP	Trp53bp1	NM_013735.3	mouse	genbank	58_37k	-1	validated	missense	c.1457	p.K486M	-	NULL	HMMPfam_BRCT,HMMSmart_SM00292,superfamily_BRCT domain,PatternScan_PTS_HPR_SER,HMMPfam_53-BP1_Tudor,superfamily_Tudor/PWWP/MBT	-	no_errors	Unknown	Unknown	Unknown	50	0	0	32	32	50	Somatic	1	22.8082	60	47	43.93
2	121281331	121281331	A	T	SNP	Serf2	ENSMUST00000154418	mouse	ensembl	58_37k	1	known	missense	c.136	p.S46C	-	NULL	HMMPfam_4F5	-	no_errors	Unknown	Unknown	Unknown	30	0	0	22	5	18.52	Somatic	0.975914	3.70308	4	0	0
2	121282244	121282244	G	T	SNP	Serinc4	NM_001025371.2	mouse	genbank	58_37k	-1	validated	missense	c.46	p.L16I	-	NULL	HMMPfam_Serinc	-	no_errors	Unknown	Unknown	Unknown	98	0	0	63	56	47.06	Somatic	1	40.6485	0	0	0
2	121953334	121953339	CACACA	-	DEL	Patl2	NM_026251.2	mouse	genbank	58_37k	-1	validated	intronic	c.226-53_226-48	e3-48	-	-	-	-	no_errors	Unknown	Unknown	Unknown	NA	NA	NA	NA	NA	NA	Somatic	NA	NA	NA	NA	NA
2	121999860	121999860	C	T	SNP	Patl2	NM_026251.2	mouse	genbank	58_37k	-1	validated	intronic	c.1+4971	e0+4971	-	-	-	-	no_errors	Unknown	Unknown	Unknown	93	0	0	63	42	40	Somatic	1	30.7163	0	0	0
2	122119763	122119763	C	A	SNP	Duox2	NM_177610.2	mouse	genbank	58_37k	-1	provisional	nonsense	c.1198	p.E400*	-	HMMPfam_An_peroxidase,superfamily_Peroxidase_super	HMMPfam_An_peroxidase,HMMSmart_EFh,superfamily_Peroxidase_super,HMMPfam_FAD_binding_8,HMMPfam_NAD_binding_6,HMMPfam_Ferric_reduct,superfamily_Riboflavin_synthase_like_b-brl,PatternScan_EF_HAND_1,HMMPfam_efhand,superfamily_SSF47473,superfamily_SSF52343	-	no_errors	Unknown	Unknown	Unknown	149	0	0	82	59	41.84	Somatic	1	49.1453	0	0	0
2	122163558	122163558	A	T	SNP	Duox1	ENSMUST00000099461	mouse	ensembl	58_37k	1	known	splice_region	c.3424+3	e24+3	-	-	-	-	no_errors	Unknown	Unknown	Unknown	103	0	0	56	56	50	Somatic	1	44.644	0	0	0
2	122350411	122350411	G	T	SNP	ENSMUSG00000079071	ENSMUST00000110521	mouse	ensembl	58_37k	1	known	intronic	c.1655-123	e15-123	-	-	-	-	no_errors	Unknown	Unknown	Unknown	91	0	0	56	33	37.08	Somatic	1	26.1551	2	2	50
2	122629832	122629832	G	T	SNP	Sqrdl	NM_021507.5	mouse	genbank	58_37k	1	validated	missense	c.1039	p.A347S	-	superfamily_SSF51905	HMMPfam_Pyr_redox_2,superfamily_SSF51905	-	no_errors	Unknown	Unknown	Unknown	31	0	0	15	10	40	Somatic	0.999893	9.13949	101	70	40.94
2	125026490	125026490	G	T	SNP	Slc12a1	NM_001079690.1	mouse	genbank	58_37k	1	validated	intronic	c.2268+61	e17+61	-	-	-	-	no_errors	Unknown	Unknown	Unknown	27	0	0	18	24	57.14	Somatic	1	15.6267	0	0	0
2	125333026	125333026	G	T	SNP	Fbn1	ENSMUST00000103234	mouse	ensembl	58_37k	-1	known	5_prime_untranslated_region	c.-1687	NULL	-	-	-	-	no_errors	Unknown	Unknown	Unknown	55	0	0	31	20	39.22	Somatic	1	16.6284	0	0	0
2	125483324	125483324	C	T	SNP	Shc4	NM_199022.2	mouse	genbank	58_37k	-1	validated	missense	c.968	p.R323H	-	HMMPfam_PID,HMMSmart_PTB,superfamily_SSF50729	HMMPfam_SH2,HMMSmart_SH2,HMMPfam_PID,HMMSmart_PTB,superfamily_SSF50729,superfamily_SSF55550	-	no_errors	Unknown	Unknown	Unknown	26	0	0	22	22	50	Somatic	0.999997	12.8143	3	1	25
2	125583957	125583957	C	G	SNP	Secisbp2l	NM_177608.3	mouse	genbank	58_37k	-1	validated	missense	c.1193	p.S398T	-	NULL	HMMPfam_Ribosomal_L7Ae,superfamily_SSF55315	-	no_errors	Unknown	Unknown	Unknown	104	0	0	31	26	45.61	Somatic	1	30.8485	101	72	41.38
2	125594112	125594112	T	G	SNP	Secisbp2l	NM_177608.3	mouse	genbank	58_37k	-1	validated	intronic	c.665-43	e5-43	-	-	-	-	no_errors	Unknown	Unknown	Unknown	40	0	0	34	6	15	Somatic	0.982005	4.00038	0	0	0
2	125832900	125832900	G	T	SNP	4930525F21Rik	ENSMUST00000110446	mouse	ensembl	58_37k	-1	known	intronic	c.1074+73	e11+73	-	-	-	-	no_errors	Unknown	Unknown	Unknown	54	0	0	35	37	51.39	Somatic	1	25.8574	0	0	0
2	126953466	126953466	C	A	SNP	Ncaph	NM_144818.3	mouse	genbank	58_37k	-1	validated	splice_region	c.1-8	e1-8	-	-	-	-	no_errors	Unknown	Unknown	Unknown	47	0	0	26	21	44.68	Somatic	1	17.1474	0	0	0
2	126959692	126959692	G	T	SNP	Ncaph	NM_144818.3	mouse	genbank	58_37k	-1	validated	5_prime_flanking_region	c.-6239	NULL	-	-	-	-	no_errors	Unknown	Unknown	Unknown	39	0	0	28	24	46.15	Somatic	1	16.2189	0	0	0
2	127190190	127190190	C	A	SNP	Adra2b	NM_009633.3	mouse	genbank	58_37k	1	validated	missense	c.890	p.A297E	-	HMMPfam_7tm_1,superfamily_Family A G protein-coupled receptor-like	HMMPfam_7tm_1,PatternScan_G_PROTEIN_RECEP_F1_1,superfamily_Family A G protein-coupled receptor-like	-	no_errors	Unknown	Unknown	Unknown	151	0	0	88	56	38.89	Somatic	1	45.6179	0	0	0
2	127337899	127337899	G	T	SNP	Kcnip3	NM_019789.3	mouse	genbank	58_37k	-1	validated	intronic	c.16-1169	e2-1169	-	-	-	-	no_errors	Unknown	Unknown	Unknown	10	0	0	7	5	41.67	Somatic	0.970951	3.5403	0	0	0
2	127354828	127354828	C	A	SNP	Prom2	NM_138750.2	mouse	genbank	58_37k	-1	validated	intronic	c.2444+40	e22+40	-	-	-	-	no_errors	Unknown	Unknown	Unknown	27	0	0	12	11	47.83	Somatic	0.999961	10.1534	0	0	0
2	127360830	127360830	G	T	SNP	Prom2	NM_138750.2	mouse	genbank	58_37k	-1	validated	silent	c.1599	p.S533	-	HMMPfam_Prominin	HMMPfam_Prominin	-	no_errors	Unknown	Unknown	Unknown	76	0	0	53	57	51.82	Somatic	1	37.6819	0	0	0
2	127566631	127566631	G	A	SNP	Nphp1	ENSMUST00000144938	mouse	ensembl	58_37k	-1	known	5_prime_untranslated_region	c.-127566631	NULL	-	-	-	-	no_coding_region	Unknown	Unknown	Unknown	61	0	0	31	17	35.42	Somatic	1	15.3753	107	110	50.69
2	128441052	128441052	C	G	SNP	Anapc1	NM_008569.2	mouse	genbank	58_37k	-1	validated	intronic	c.5719+54	e46+54	-	-	-	-	no_errors	Unknown	Unknown	Unknown	9	0	0	7	7	50	Somatic	0.98504	4.33906	2	3	60
2	128460057	128460057	C	T	SNP	Anapc1	NM_008569.2	mouse	genbank	58_37k	-1	validated	intronic	c.4142+112	e31+112	-	-	-	-	no_errors	Unknown	Unknown	Unknown	17	0	0	9	8	47.06	Somatic	0.998667	6.62529	4	2	33.33
2	128609727	128609727	G	C	SNP	Mertk	NM_008587.1	mouse	genbank	58_37k	1	provisional	missense	c.2045	p.R682P	-	HMMPfam_Pkinase_Tyr,HMMSmart_SM00219,HMMSmart_SM00220,superfamily_Protein kinase-like (PK-like)	HMMPfam_Pkinase_Tyr,HMMSmart_SM00219,HMMSmart_SM00220,HMMSmart_SM00409,HMMPfam_fn3,HMMSmart_SM00060,PatternScan_PROTEIN_KINASE_TYR,superfamily_Fibronectin type III,superfamily_Protein kinase-like (PK-like),HMMPfam_ig,PatternScan_PROTEIN_KINASE_ATP,superfa	-	no_errors	Unknown	Unknown	Unknown	72	0	0	37	37	50	Somatic	1	30.6292	43	10	18.87
2	128616104	128616104	T	G	SNP	Mertk	NM_008587.1	mouse	genbank	58_37k	1	provisional	intronic	c.2174+42	e16+42	-	-	-	-	no_errors	Unknown	Unknown	Unknown	28	0	0	9	11	55	Somatic	0.999992	11.7927	0	0	0
2	128657283	128657283	G	T	SNP	Tmem87b	NM_028248.2	mouse	genbank	58_37k	1	validated	missense	c.755	p.W252L	-	HMMPfam_Lung_7-TM_R	HMMPfam_Lung_7-TM_R	-	no_errors	Unknown	Unknown	Unknown	42	0	0	27	32	54.24	Somatic	1	21.9646	55	51	48.11
2	128951173	128951173	C	T	SNP	Polr1b	NM_009086.2	mouse	genbank	58_37k	1	validated	missense	c.2749	p.P917S	-	HMMPfam_RNA_pol_Rpb2_6,superfamily_SSF64484	HMMPfam_RNA_pol_Rpb2_6,PatternScan_RNA_POL_BETA,HMMPfam_RNA_pol_Rpb2_7,HMMPfam_RNA_pol_Rpb2_2,HMMPfam_RNA_pol_Rpb2_1,HMMPfam_RNA_pol_Rpb2_3,HMMPfam_RNA_pol_Rpb2_5,HMMPfam_RNA_pol_Rpa2_4,superfamily_SSF64484	-	no_errors	Unknown	Unknown	Unknown	81	0	0	46	52	53.06	Somatic	1	39.3069	111	113	50.45
2	129191673	129191673	G	T	SNP	Il1b	NM_008361.3	mouse	genbank	58_37k	-1	provisional	intronic	c.600+23	e5+23	-	-	-	-	no_errors	Unknown	Unknown	Unknown	20	0	0	13	14	51.85	Somatic	0.999939	9.72793	0	0	0
2	129873890	129873890	C	A	SNP	Tgm3	NM_009374.2	mouse	genbank	58_37k	1	validated	intronic	c.1935-99	e13-99	-	-	-	-	no_errors	Unknown	Unknown	Unknown	40	0	0	9	13	59.09	Somatic	1	16.5532	0	0	0
2	130266999	130266999	G	A	SNP	Vps16	NM_030559.3	mouse	genbank	58_37k	1	validated	silent	c.1575	p.R525	-	HMMPfam_Vps16_C	HMMPfam_Vps16_C,HMMPfam_Vps16_N	-	no_errors	Unknown	Unknown	Unknown	44	0	0	20	15	42.86	Somatic	0.999999	14.0531	114	69	37.5
2	130345222	130345222	A	G	SNP	Ptpra	NM_008980.2	mouse	genbank	58_37k	1	validated	missense	c.689	p.K230R	-	superfamily_SSF52799	HMMPfam_Y_phosphatase,HMMSmart_PTPc,PatternScan_TYR_PHOSPHATASE_1,superfamily_SSF52799	-	no_errors	Unknown	Unknown	Unknown	18	0	0	6	8	57.14	Somatic	0.999736	8.25311	268	218	44.86
2	130493556	130493557	-	T	INS	Itpa	ENSMUST00000103193	mouse	ensembl	58_37k	1	known	5_prime_untranslated_region	c.-50	NULL	-	-	-	-	no_errors	Unknown	Unknown	Unknown	54	0	0	39	26	40	Somatic	1	18.185	11	4	26.67
2	130567693	130567693	T	A	SNP	4930402H24Rik	NM_029432.1	mouse	genbank	58_37k	-1	predicted	missense	c.1795	p.T599S	-	NULL	PatternScan_ZINC_FINGER_C2H2_1	-	no_errors	Unknown	Unknown	Unknown	17	0	0	18	12	40	Somatic	0.998233	6.33967	42	46	52.27
2	130786270	130786270	G	C	SNP	Atrn	NM_009730.2	mouse	genbank	58_37k	1	validated	missense	c.1594	p.D532H	-	superfamily_Gal_oxid_central	HMMPfam_CUB,HMMSmart_CUB,superfamily_CUB,HMMPfam_Lectin_C,HMMSmart_CLECT,HMMPfam_Laminin_EGF,HMMSmart_EGF_Lam,PatternScan_EGF_LAM_1,HMMPfam_PSI,HMMSmart_PSI,HMMPfam_EGF,HMMSmart_EGF,HMMPfam_Kelch_1,superfamily_Gal_oxid_central,PatternScan_EGF_1,PatternSca	-	no_errors	Unknown	Unknown	Unknown	51	0	0	28	33	54.1	Somatic	1	25.3113	73	92	54.76
2	131019765	131019765	G	T	SNP	Cdc25b	NM_023117.2	mouse	genbank	58_37k	1	validated	intronic	c.1183-86	e12-86	-	-	-	-	no_errors	Unknown	Unknown	Unknown	46	0	0	32	30	47.62	Somatic	1	20.4058	1	0	0
2	131346744	131346744	G	T	SNP	Smox	NM_145533.2	mouse	genbank	58_37k	1	validated	missense	c.1206	p.E402D	-	HMMPfam_Amino_oxidase,superfamily_FAD/NAD(P)-binding domain,superfamily_FAD-linked reductases C-terminal domain	HMMPfam_Amino_oxidase,superfamily_FAD/NAD(P)-binding domain,superfamily_FAD-linked reductases C-terminal domain	-	no_errors	Unknown	Unknown	Unknown	83	0	0	48	31	39.24	Somatic	1	25.3368	59	56	48.7
2	131681578	131681578	G	T	SNP	Erv3	ENSMUST00000040941	mouse	ensembl	58_37k	-1	known	nonsense	c.596	p.S199*	-	NULL	NULL	-	no_errors	Unknown	Unknown	Unknown	36	0	0	14	16	53.33	Somatic	1	15.4651	0	0	0
2	132576177	132576177	A	T	SNP	1110034G24Rik	ENSMUST00000061891	mouse	ensembl	58_37k	1	known	missense	c.407	p.Q136L	-	NULL	NULL	-	no_errors	Unknown	Unknown	Unknown	46	0	0	29	25	46.3	Somatic	1	18.4895	3	6	66.67
2	135813487	135813498	AGAGAGACAGAC	-	DEL	Plcb4	NM_013829.2	mouse	genbank	58_37k	1	provisional	intronic	c.2779-86_2779-75	e28-75	-	-	-	-	no_errors	Unknown	Unknown	Unknown	NA	NA	NA	NA	NA	NA	Somatic	NA	NA	NA	NA	NA
2	135926845	135926845	G	T	SNP	Pak7	NM_172858.2	mouse	genbank	58_37k	-1	validated	missense	c.1110	p.S370R	-	NULL	HMMPfam_PBD,HMMSmart_SM00285,HMMSmart_SM00219,HMMSmart_SM00220,superfamily_Protein kinase-like (PK-like),PatternScan_PROTEIN_KINASE_ATP,HMMPfam_Pkinase	-	no_errors	Unknown	Unknown	Unknown	81	0	0	40	35	46.67	Somatic	1	30.4164	0	0	0
2	139583164	139583164	G	T	SNP	Ism1	ENSMUST00000099307	mouse	ensembl	58_37k	1	known	missense	c.1299	p.Q433H	-	HMMPfam_AMOP,HMMSmart_AMOP	HMMPfam_TSP_1,HMMSmart_TSP1,superfamily_TSP1,HMMPfam_AMOP,HMMSmart_AMOP	-	no_errors	Unknown	Unknown	Unknown	28	0	0	15	23	60.53	Somatic	1	16.8967	4	5	55.56
2	140531932	140531932	T	A	SNP	Macrod2	ENSMUST00000110063	mouse	ensembl	58_37k	1	known	splice_region	c.272-6	e4-6	-	-	-	-	no_errors	Unknown	Unknown	Unknown	30	0	0	19	20	51.28	Somatic	0.999999	14.2181	0	0	0
2	141058209	141058209	C	A	SNP	ENSMUSG00000074763	ENSMUST00000143227	mouse	ensembl	58_37k	-1	known	5_prime_untranslated_region	c.-141058209	NULL	-	-	-	-	no_coding_region	Unknown	Unknown	Unknown	39	0	0	5	9	64.29	Somatic	1	14.6296	0	0	0
2	144082874	144082874	C	A	SNP	Snx5	NM_024225.4	mouse	genbank	58_37k	-1	provisional	missense	c.571	p.V191L	-	HMMPfam_Vps5	HMMPfam_PX,superfamily_PX domain,HMMPfam_Vps5	-	no_errors	Unknown	Unknown	Unknown	149	0	0	81	85	50.6	Somatic	1	67.165	510	433	45.92
2	144304665	144304665	C	A	SNP	6330439K17Rik	NM_172859.2	mouse	genbank	58_37k	-1	validated	intronic	c.2096+86	e18+86	-	-	-	-	no_errors	Unknown	Unknown	Unknown	40	0	0	13	15	53.57	Somatic	1	16.1417	0	0	0
2	144425835	144425835	G	-	DEL	Dtd1	NM_025314.3	mouse	genbank	58_37k	1	validated	splice_region_del	c.43+8	e1+8	-	-	-	-	no_errors	Unknown	Unknown	Unknown	29	0	0	18	5	21.74	Somatic	0.984105	4.1266	0	0	0
2	145070834	145070834	G	C	SNP	Slc24a3	NM_053195.2	mouse	genbank	58_37k	1	provisional	splice_region	c.118+9	e1+9	-	-	-	-	no_errors	Unknown	Unknown	Unknown	76	0	0	50	41	45.05	Somatic	1	29.6826	0	0	0
2	145648592	145648592	G	T	SNP	Rin2	NM_028724.4	mouse	genbank	58_37k	1	validated	intronic	c.23+95	e1+95	-	-	-	-	no_errors	Unknown	Unknown	Unknown	9	0	0	7	6	46.15	Somatic	0.976745	3.82809	0	2	100
2	145648593	145648593	G	T	SNP	Rin2	NM_028724.4	mouse	genbank	58_37k	1	validated	intronic	c.23+96	e1+96	-	-	-	-	no_errors	Unknown	Unknown	Unknown	9	0	0	7	6	46.15	Somatic	0.976745	3.82809	0	2	100
2	145708947	145708947	G	T	SNP	Rin2	NM_028724.4	mouse	genbank	58_37k	1	validated	intronic	c.2093-111	e9-111	-	-	-	-	no_errors	Unknown	Unknown	Unknown	16	0	0	20	12	37.5	Somatic	0.996527	5.66126	0	0	0
2	145789203	145789203	A	C	SNP	4930529M08Rik	NM_175280.3	mouse	genbank	58_37k	1	validated	missense	c.736	p.N246H	-	NULL	NULL	-	no_errors	Unknown	Unknown	Unknown	19	0	0	6	10	62.5	Somatic	0.99996	10.1635	0	0	0
2	145799350	145799350	G	A	SNP	4930529M08Rik	ENSMUST00000133433	mouse	ensembl	58_37k	1	known	missense	c.842	p.S281N	-	NULL	superfamily_Acyl_CoA_acyltransferase,superfamily_SSF51905	-	no_errors	Unknown	Unknown	Unknown	185	0	0	94	75	44.38	Somatic	1	64.8805	0	0	0
2	146153179	146153179	C	A	SNP	Ralgapa2	ENSMUST00000109986	mouse	ensembl	58_37k	-1	known	missense	c.5413	p.V1805F	-	HMMPfam_Rap_GAP,superfamily_Rap/Ran-GAP (Pfam 02145)	HMMPfam_Rap_GAP,superfamily_Rap/Ran-GAP (Pfam 02145)	-	no_errors	Unknown	Unknown	Unknown	31	0	0	5	15	75	Somatic	1	19.3374	15	6	28.57
2	146172691	146172691	A	G	SNP	Ralgapa2	ENSMUST00000109986	mouse	ensembl	58_37k	-1	known	intronic	c.3874-109	e31-109	-	-	-	-	no_errors	Unknown	Unknown	Unknown	66	0	0	16	10	38.46	Somatic	0.999999	13.6412	1	0	0
2	147869289	147869289	G	T	SNP	Foxa2	NM_010446.2	mouse	genbank	58_37k	-1	validated	nonsense	c.1341	p.Y447*	-	HMMPfam_HNF_C	HMMPfam_Fork_head,HMMSmart_FH,HMMPfam_Fork_head_N,PatternScan_FORK_HEAD_1,PatternScan_FORK_HEAD_2,HMMPfam_HNF_C,superfamily_SSF46785	-	no_errors	Unknown	Unknown	Unknown	20	0	0	9	8	47.06	Somatic	0.999364	7.36177	51	42	45.16
2	147869327	147869327	G	T	SNP	Foxa2	NM_010446.2	mouse	genbank	58_37k	-1	validated	missense	c.1303	p.L435M	-	HMMPfam_HNF_C	HMMPfam_Fork_head,HMMSmart_FH,HMMPfam_Fork_head_N,PatternScan_FORK_HEAD_1,PatternScan_FORK_HEAD_2,HMMPfam_HNF_C,superfamily_SSF46785	-	no_errors	Unknown	Unknown	Unknown	25	0	0	12	12	50	Somatic	0.999969	10.3896	47	33	41.25
2	148509919	148509919	G	C	SNP	Gzf1	NM_028986.3	mouse	genbank	58_37k	1	validated	silent	c.573	p.G191	-	NULL	HMMSmart_BTB,HMMPfam_zf-C2H2,PatternScan_ZINC_FINGER_C2H2_1,superfamily_BTB/POZ_fold,HMMPfam_BTB,HMMSmart_ZnF_C2H2,superfamily_SSF57667	-	no_errors	Unknown	Unknown	Unknown	24	0	0	12	11	47.83	Somatic	0.999918	9.41156	82	1	1.2
2	148509924	148509924	C	-	DEL	Gzf1	NM_028986.3	mouse	genbank	58_37k	1	validated	frame_shift_del	c.578	p.S193fs	-	NULL	HMMSmart_BTB,HMMPfam_zf-C2H2,PatternScan_ZINC_FINGER_C2H2_1,superfamily_BTB/POZ_fold,HMMPfam_BTB,HMMSmart_ZnF_C2H2,superfamily_SSF57667	-	no_errors	Unknown	Unknown	Unknown	25	0	0	13	11	45.83	Somatic	0.999908	9.29071	78	0	0
2	148509925	148509925	A	T	SNP	Gzf1	NM_028986.3	mouse	genbank	58_37k	1	validated	silent	c.579	p.S193	-	NULL	HMMSmart_BTB,HMMPfam_zf-C2H2,PatternScan_ZINC_FINGER_C2H2_1,superfamily_BTB/POZ_fold,HMMPfam_BTB,HMMSmart_ZnF_C2H2,superfamily_SSF57667	-	no_errors	Unknown	Unknown	Unknown	25	0	0	13	11	45.83	Somatic	0.999908	9.29071	77	1	1.27
2	150419924	150419924	C	A	SNP	2310001A20Rik	NM_027977.2	mouse	genbank	58_37k	-1	provisional	intronic	c.325+114	e3+114	-	-	-	-	no_errors	Unknown	Unknown	Unknown	35	0	0	12	29	70.73	Somatic	1	25.3895	1	1	50
2	150451613	150451613	C	A	SNP	Acss1	NM_080575.2	mouse	genbank	58_37k	-1	validated	missense	c.1447	p.G483C	-	HMMPfam_AMP-binding,superfamily_Acetyl-CoA synthetase-like	HMMPfam_AMP-binding,PatternScan_AMP_BINDING,superfamily_Acetyl-CoA synthetase-like	-	no_errors	Unknown	Unknown	Unknown	12	0	0	3	4	57.14	Somatic	0.992188	4.87745	0	0	0
2	150508607	150508607	A	C	SNP	Vsx1	NM_054068.2	mouse	genbank	58_37k	-1	provisional	3_prime_untranslated_region	c.*130	NULL	-	-	-	-	no_errors	Unknown	Unknown	Unknown	35	0	0	9	11	55	Somatic	0.999998	13.4076	0	0	0
2	150508757	150508757	G	T	SNP	Vsx1	NM_054068.2	mouse	genbank	58_37k	-1	provisional	missense	c.1072	p.P358T	-	NULL	HMMPfam_Homeobox,HMMSmart_SM00389,superfamily_Homeodomain-like,PatternScan_HOMEOBOX_1	-	no_errors	Unknown	Unknown	Unknown	101	0	0	43	59	57.84	Somatic	1	51.897	0	0	0
2	150514620	150514620	G	A	SNP	Vsx1	NM_054068.2	mouse	genbank	58_37k	-1	provisional	missense	c.77	p.S26F	-	NULL	HMMPfam_Homeobox,HMMSmart_SM00389,superfamily_Homeodomain-like,PatternScan_HOMEOBOX_1	-	no_errors	Unknown	Unknown	Unknown	212	0	0	101	173	62.91	Somatic	1	133.935	0	0	0
2	151299603	151299603	T	A	SNP	4921509C19Rik	NM_198655.2	mouse	genbank	58_37k	-1	provisional	intronic	c.1-67	e1-67	-	-	-	-	no_errors	Unknown	Unknown	Unknown	39	0	0	25	15	37.5	Somatic	0.99999	11.5426	0	0	0
2	152128014	152128014	G	T	SNP	Tbc1d20	NM_024196.3	mouse	genbank	58_37k	1	provisional	missense	c.194	p.R65M	-	HMMPfam_TBC,HMMSmart_SM00164,superfamily_Ypt/Rab-GAP domain of gyp1p	HMMPfam_TBC,HMMSmart_SM00164,superfamily_Ypt/Rab-GAP domain of gyp1p	-	no_errors	Unknown	Unknown	Unknown	22	0	0	9	24	72.73	Somatic	1	18.1189	188	300	61.48
2	152746876	152746876	G	C	SNP	Mylk2	NM_001081044.2	mouse	genbank	58_37k	1	validated	missense	c.1762	p.G588R	-	NULL	HMMSmart_SM00219,HMMSmart_SM00220,PatternScan_PROTEIN_KINASE_ST,superfamily_Protein kinase-like (PK-like),PatternScan_PROTEIN_KINASE_ATP,HMMPfam_Pkinase	-	no_errors	Unknown	Unknown	Unknown	22	0	0	10	24	70.59	Somatic	1	17.4246	0	0	0
2	152771137	152771137	G	T	SNP	Dusp15	NM_145744.2	mouse	genbank	58_37k	-1	validated	intronic	c.263+26	e5+26	-	-	-	-	no_errors	Unknown	Unknown	Unknown	85	0	0	99	35	26.12	Somatic	1	18.4106	0	0	0
2	152960294	152960294	G	T	SNP	Hck	NM_010407.4	mouse	genbank	58_37k	1	reviewed	intronic	c.677-66	e8-66	-	-	-	-	no_errors	Unknown	Unknown	Unknown	10	0	0	5	7	58.33	Somatic	0.995065	5.50999	0	0	0
2	153296348	153296348	C	A	SNP	8430427H17Rik	NM_001001986.	mouse	genbank	58_37k	-1	validated	intronic	c.144+76	e2+76	-	-	-	-	no_errors	Unknown	Unknown	Unknown	22	0	0	17	9	34.62	Somatic	0.997917	6.17175	1	0	0
2	153493260	153493260	A	T	SNP	Dnmt3b	NM_001003961.	mouse	genbank	58_37k	1	validated	silent	c.696	p.I232	-	HMMPfam_PWWP,HMMSmart_SM00293,superfamily_Tudor/PWWP/MBT	HMMPfam_PWWP,HMMSmart_SM00293,HMMPfam_DNA_methylase,superfamily_FYVE/PHD zinc finger,PatternScan_C5_MTASE_1,superfamily_S-adenosyl-L-methionine-dependent methyltransferases,superfamily_Tudor/PWWP/MBT	-	no_errors	Unknown	Unknown	Unknown	51	0	0	48	35	42.17	Somatic	1	19.935	10	5	33.33
2	153496175	153496175	A	C	SNP	Dnmt3b	NM_001003961.	mouse	genbank	58_37k	1	validated	missense	c.1079	p.K360T	-	NULL	HMMPfam_PWWP,HMMSmart_SM00293,HMMPfam_DNA_methylase,superfamily_FYVE/PHD zinc finger,PatternScan_C5_MTASE_1,superfamily_S-adenosyl-L-methionine-dependent methyltransferases,superfamily_Tudor/PWWP/MBT	-	no_errors	Unknown	Unknown	Unknown	36	0	0	41	17	29.31	Somatic	0.999875	8.98564	12	1	7.69
2	153607626	153607626	C	-	DEL	Efcab8	ENSMUST00000055893	mouse	ensembl	58_37k	1	known	intronic	c.219+75	e2+75	-	-	-	-	no_errors	Unknown	Unknown	Unknown	18	0	0	11	8	42.11	Somatic	0.997979	6.20399	0	1	100
2	153691036	153691036	T	G	SNP	Sun5	NM_029599.1	mouse	genbank	58_37k	-1	provisional	splice_region	c.453+4	e7+4	-	-	-	-	no_errors	Unknown	Unknown	Unknown	154	0	0	145	54	27	Somatic	1	33.1416	0	0	0
2	153728473	153728473	C	T	SNP	Bpil3	NM_199303.2	mouse	genbank	58_37k	1	validated	missense	c.97	p.H33Y	-	HMMPfam_LBP_BPI_CETP,HMMSmart_BPI1,superfamily_Bactericidal_perm-incr_a/b_dom	HMMPfam_LBP_BPI_CETP_C,HMMSmart_BPI2,HMMPfam_LBP_BPI_CETP,HMMSmart_BPI1,superfamily_Bactericidal_perm-incr_a/b_dom	-	no_errors	Unknown	Unknown	Unknown	77	0	0	61	32	34.41	Somatic	1	21.5824	0	0	0
2	153810796	153810796	C	A	SNP	Gm5840	NM_001080811.1	mouse	genbank	58_37k	1	provisional	intronic	c.297+47	e2+47	-	-	-	-	no_errors	Unknown	Unknown	Unknown	12	0	0	11	8	42.11	Somatic	0.990308	4.64914	0	0	0
2	153834840	153834840	A	T	SNP	Psp	NM_008953.2	mouse	genbank	58_37k	1	provisional	splice_region	c.1-9	e1-9	-	-	-	-	no_errors	Unknown	Unknown	Unknown	71	0	0	35	53	60.23	Somatic	1	41.3492	0	0	0
2	153839502	153839502	A	C	SNP	Psp	NM_008953.2	mouse	genbank	58_37k	1	provisional	splice_region	c.606+4	e5+4	-	-	-	-	no_errors	Unknown	Unknown	Unknown	174	0	0	121	129	51.6	Somatic	1	85.6059	0	0	0
2	153989946	153989946	T	A	SNP	2310021H06Rik	NM_025990.4	mouse	genbank	58_37k	1	validated	missense	c.317	p.V106D	-	HMMPfam_LBP_BPI_CETP	HMMPfam_LBP_BPI_CETP,superfamily_Bactericidal permeability-increasing protein BPI	-	no_errors	Unknown	Unknown	Unknown	93	0	0	42	78	65	Somatic	1	61.2916	0	0	0
2	154039284	154039284	A	T	SNP	U46068	NM_001012392.1	mouse	genbank	58_37k	1	validated	intronic	c.978+30	e9+30	-	-	-	-	no_errors	Unknown	Unknown	Unknown	44	0	0	39	28	41.79	Somatic	1	16.7164	0	0	0
2	154041060	154041060	G	A	SNP	U46068	NM_001012392.1	mouse	genbank	58_37k	1	validated	missense	c.1201	p.V401I	-	superfamily_Bactericidal permeability-increasing protein BPI	HMMPfam_LBP_BPI_CETP,HMMSmart_SM00328,superfamily_Bactericidal permeability-increasing protein BPI	-	no_errors	Unknown	Unknown	Unknown	136	0	0	104	56	35	Somatic	1	38.6151	0	0	0
2	155319551	155319551	T	G	SNP	Ggt7	NM_144786.2	mouse	genbank	58_37k	-1	validated	intronic	c.1726-107	e14-107	-	-	-	-	no_errors	Unknown	Unknown	Unknown	25	0	0	20	9	31.03	Somatic	0.9978	6.11713	0	0	0
2	155407603	155407603	C	A	SNP	Gss	NM_008180.1	mouse	genbank	58_37k	-1	provisional	intronic	c.275+21	e2+21	-	-	-	-	no_errors	Unknown	Unknown	Unknown	102	0	0	68	100	59.52	Somatic	1	63.5636	0	0	0
2	155446462	155446462	C	A	SNP	Myh7b	ENSMUST00000092995	mouse	ensembl	58_37k	1	known	intronic	c.1148-55	e13-55	-	-	-	-	no_errors	Unknown	Unknown	Unknown	43	0	0	33	20	37.74	Somatic	0.999999	13.5688	0	0	0
2	155451623	155451623	G	T	SNP	Myh7b	ENSMUST00000092995	mouse	ensembl	58_37k	1	known	nonsense	c.2344	p.E782*	-	HMMSmart_MYSc,superfamily_SSF52540	HMMSmart_IQ,HMMPfam_Myosin_head,HMMSmart_MYSc,HMMPfam_Myosin_tail_1,HMMPfam_Myosin_N,superfamily_SSF52540	-	no_errors	Unknown	Unknown	Unknown	49	0	0	24	53	68.83	Somatic	1	37.4758	0	0	0
2	155841262	155841262	A	C	SNP	Ergic3	NM_025516.4	mouse	genbank	58_37k	1	provisional	intronic	c.686-463	e8-463	-	-	-	-	no_errors	Unknown	Unknown	Unknown	88	0	0	59	79	57.25	Somatic	1	51.1766	2	3	60
2	155857400	155857400	T	A	SNP	Fer1l4	ENSMUST00000109611	mouse	ensembl	58_37k	-1	known	silent	c.3720	p.I1240	-	NULL	HMMPfam_C2,HMMSmart_C2,superfamily_C2_CaLB,HMMPfam_FerB,HMMPfam_FerI	-	no_errors	Unknown	Unknown	Unknown	97	0	0	43	75	63.56	Somatic	1	60.6732	0	0	0
2	156049036	156049036	C	T	SNP	Phf20	ENSMUST00000153822	mouse	ensembl	58_37k	1	known	3_prime_untranslated_region	c.*156049036	NULL	-	-	-	-	no_coding_region	Unknown	Unknown	Unknown	26	0	0	26	20	43.48	Somatic	0.999979	10.787	1	0	0
2	156118397	156118397	G	T	SNP	Phf20	NM_172674.2	mouse	genbank	58_37k	1	validated	intronic	c.1669+97	e10+97	-	-	-	-	no_errors	Unknown	Unknown	Unknown	25	0	0	9	11	55	Somatic	0.999983	11.0127	1	0	0
2	156332380	156332380	G	A	SNP	Epb4.1l1	NM_001006664.2	mouse	genbank	58_37k	1	validated	intronic	c.1026+141	e8+141	-	-	-	-	no_errors	Unknown	Unknown	Unknown	13	0	0	7	10	58.82	Somatic	0.999311	7.44737	3	1	25
2	156381632	156381632	G	A	SNP	0610011L14Rik	NM_026661.4	mouse	genbank	58_37k	1	validated	missense	c.827	p.R276Q	-	HMMPfam_AAR2	HMMPfam_AAR2	-	no_errors	Unknown	Unknown	Unknown	43	0	0	36	16	30.77	Somatic	0.999974	10.5418	172	114	39.72
2	156754711	156754711	C	T	SNP	Ndrg3	NM_013865.2	mouse	genbank	58_37k	-1	validated	intronic	c.947-94	e15-94	-	-	-	-	no_errors	Unknown	Unknown	Unknown	14	0	0	7	18	72	Somatic	0.999988	11.9527	0	1	100
2	156828411	156828411	C	A	SNP	Dsn1	NM_025853.3	mouse	genbank	58_37k	-1	validated	intronic	c.423+14	e3+14	-	-	-	-	no_errors	Unknown	Unknown	Unknown	270	0	0	277	126	31.27	Somatic	1	71.4389	0	0	0
2	157821233	157821233	C	G	SNP	2610036D13Rik	NM_029282.1	mouse	genbank	58_37k	-1	predicted	missense	c.2662	p.V888L	-	superfamily_ARM-type_fold	superfamily_ARM-type_fold	-	no_errors	Unknown	Unknown	Unknown	22	0	0	9	25	73.53	Somatic	1	18.6237	78	134	63.21
2	157900544	157900544	G	T	SNP	Rprd1b	NM_027434.2	mouse	genbank	58_37k	1	provisional	intronic	c.829-122	e7-122	-	-	-	-	no_errors	Unknown	Unknown	Unknown	31	0	0	27	15	35.71	Somatic	0.999917	9.39176	0	2	100
2	158151459	158151459	C	A	SNP	Lbp	NM_008489.2	mouse	genbank	58_37k	1	validated	missense	c.1166	p.A389D	-	HMMPfam_LBP_BPI_CETP_C,HMMSmart_BPI2,superfamily_Bactericidal_perm-incr_a/b_dom	HMMPfam_LBP_BPI_CETP_C,HMMSmart_BPI2,HMMPfam_LBP_BPI_CETP,HMMSmart_BPI1,superfamily_Bactericidal_perm-incr_a/b_dom,PatternScan_LBP_BPI_CETP	-	no_errors	Unknown	Unknown	Unknown	218	0	0	252	109	30.19	Somatic	1	56.75	2	0	0
2	158303522	158303522	G	C	SNP	Ralgapb	NM_177658.3	mouse	genbank	58_37k	1	validated	intronic	c.3808+23	e24+23	-	-	-	-	no_errors	Unknown	Unknown	Unknown	72	0	0	64	27	29.67	Somatic	1	17.1169	0	2	100
2	158437410	158437410	C	G	SNP	Slc32a1	NM_009508.2	mouse	genbank	58_37k	1	validated	intronic	c.390+43	e1+43	-	-	-	-	no_errors	Unknown	Unknown	Unknown	37	0	0	18	28	60.87	Somatic	1	21.8978	0	0	0
2	158439703	158439703	C	G	SNP	Slc32a1	NM_009508.2	mouse	genbank	58_37k	1	validated	missense	c.541	p.R181G	-	HMMPfam_Aa_trans	HMMPfam_Aa_trans	-	no_errors	Unknown	Unknown	Unknown	52	0	0	38	26	40	Somatic	1	17.9707	0	0	0
2	158582730	158582730	C	A	SNP	Ppp1r16b	NM_153089.4	mouse	genbank	58_37k	1	validated	missense	c.973	p.Q325K	-	NULL	HMMPfam_Ank,HMMSmart_SM00248,superfamily_Ankyrin repeat	-	no_errors	Unknown	Unknown	Unknown	53	0	0	38	23	37.7	Somatic	1	16.3707	0	0	0
2	160541628	160541628	G	T	SNP	Top1	NM_009408.2	mouse	genbank	58_37k	1	validated	intronic	c.1828+65	e17+65	-	-	-	-	no_errors	Unknown	Unknown	Unknown	30	0	0	13	40	75.47	Somatic	1	27.6495	2	1	33.33
2	160790854	160790854	C	G	SNP	Chd6	NM_173368.2	mouse	genbank	58_37k	-1	validated	intronic	c.6124+51	e30+51	-	-	-	-	no_errors	Unknown	Unknown	Unknown	96	0	0	63	36	36.36	Somatic	1	27.4149	7	3	30
2	160854866	160854866	A	T	SNP	Chd6	NM_173368.2	mouse	genbank	58_37k	-1	validated	intronic	c.1089+48	e7+48	-	-	-	-	no_errors	Unknown	Unknown	Unknown	246	0	0	113	239	67.9	Somatic	1	178.979	2	6	75
2	161377638	161377638	G	T	SNP	Ptprt	NM_021464.4	mouse	genbank	58_37k	-1	provisional	missense	c.3541	p.P1181T	-	HMMSmart_SM00194,superfamily_(Phosphotyrosine protein) phosphatases II	HMMPfam_Y_phosphatase,HMMSmart_SM00194,HMMPfam_MAM,HMMSmart_SM00137,PatternScan_MAM_1,HMMSmart_SM00404,HMMPfam_fn3,HMMSmart_SM00060,superfamily_Fibronectin type III,PatternScan_TYR_PHOSPHATASE_1,superfamily_Immunoglobulin,superfamily_(Phosphotyrosine prot	-	no_errors	Unknown	Unknown	Unknown	66	0	0	18	32	64	Somatic	1	34.9901	0	0	0
2	161379610	161379610	C	G	SNP	Ptprt	NM_021464.4	mouse	genbank	58_37k	-1	provisional	missense	c.3378	p.Q1126H	-	HMMPfam_Y_phosphatase,HMMSmart_SM00194,HMMSmart_SM00404,superfamily_(Phosphotyrosine protein) phosphatases II	HMMPfam_Y_phosphatase,HMMSmart_SM00194,HMMPfam_MAM,HMMSmart_SM00137,PatternScan_MAM_1,HMMSmart_SM00404,HMMPfam_fn3,HMMSmart_SM00060,superfamily_Fibronectin type III,PatternScan_TYR_PHOSPHATASE_1,superfamily_Immunoglobulin,superfamily_(Phosphotyrosine prot	-	no_errors	Unknown	Unknown	Unknown	6	0	0	8	10	55.56	Somatic	0.965623	3.87503	0	0	0
2	161390347	161390347	T	G	SNP	Ptprt	NM_021464.4	mouse	genbank	58_37k	-1	provisional	intronic	c.2964+16	e20+16	-	-	-	-	no_errors	Unknown	Unknown	Unknown	141	0	0	137	15	9.87	Somatic	0.99985	8.80236	0	0	0
2	161413355	161413355	G	T	SNP	Ptprt	NM_021464.4	mouse	genbank	58_37k	-1	provisional	missense	c.2680	p.Q894K	-	HMMSmart_SM00194,superfamily_(Phosphotyrosine protein) phosphatases II	HMMPfam_Y_phosphatase,HMMSmart_SM00194,HMMPfam_MAM,HMMSmart_SM00137,PatternScan_MAM_1,HMMSmart_SM00404,HMMPfam_fn3,HMMSmart_SM00060,superfamily_Fibronectin type III,PatternScan_TYR_PHOSPHATASE_1,superfamily_Immunoglobulin,superfamily_(Phosphotyrosine prot	-	no_errors	Unknown	Unknown	Unknown	151	0	0	104	54	34.18	Somatic	1	40.1893	0	0	0
2	162773671	162773671	C	A	SNP	L3mbtl	NM_001081338.1	mouse	genbank	58_37k	1	provisional	intronic	c.351+41	e2+41	-	-	-	-	no_errors	Unknown	Unknown	Unknown	64	0	0	48	30	37.97	Somatic	1	20.6067	0	0	0
2	162888148	162888148	G	C	SNP	Mybl2	NM_008652.2	mouse	genbank	58_37k	1	provisional	intronic	c.187-45	e4-45	-	-	-	-	no_errors	Unknown	Unknown	Unknown	41	0	0	22	34	60.71	Somatic	1	24.9007	2	0	0
2	162901467	162901467	G	T	SNP	Mybl2	NM_008652.2	mouse	genbank	58_37k	1	provisional	silent	c.1470	p.T490	-	HMMPfam_Cmyb_C	HMMSmart_SM00717,superfamily_Homeodomain-like,HMMPfam_Myb_DNA-binding,HMMPfam_Cmyb_C	-	no_errors	Unknown	Unknown	Unknown	20	0	0	21	27	56.25	Somatic	0.999996	12.5864	137	245	63.97
2	163575636	163575636	C	A	SNP	Ada	NM_007398.3	mouse	genbank	58_37k	-1	provisional	intronic	c.33+159	e1+159	-	-	-	-	no_errors	Unknown	Unknown	Unknown	21	0	0	7	22	75.86	Somatic	1	18.0582	0	1	100
2	163651075	163651075	C	A	SNP	Wisp2	NM_016873.2	mouse	genbank	58_37k	1	validated	missense	c.259	p.R87S	-	HMMPfam_IGFBP,HMMSmart_IB	HMMPfam_IGFBP,HMMSmart_IB,HMMPfam_TSP_1,HMMSmart_TSP1,superfamily_TSP1,HMMPfam_VWC,HMMSmart_VWC,PatternScan_VWFC_1,PatternScan_IGFBP_N_1	-	no_errors	Unknown	Unknown	Unknown	47	0	0	22	39	63.93	Somatic	1	30.2841	7	9	56.25
2	164231491	164231491	C	G	SNP	Rbpjl	NM_009036.1	mouse	genbank	58_37k	1	provisional	intronic	c.251+112	e3+112	-	-	-	-	no_errors	Unknown	Unknown	Unknown	30	0	0	16	21	56.76	Somatic	1	16.0528	0	0	0
2	164423127	164423127	G	T	SNP	Wfdc8	ENSMUST00000094350	mouse	ensembl	58_37k	-1	known	missense	c.834	p.H278Q	-	NULL	HMMPfam_Kunitz_BPTI,HMMSmart_KU,PatternScan_BPTI_KUNITZ_1,superfamily_Prot_inh_Kunz-m,HMMPfam_WAP,HMMSmart_WAP,superfamily_WAP,PatternScan_4_DISULFIDE_CORE	-	no_errors	Unknown	Unknown	Unknown	32	0	0	15	30	66.67	Somatic	1	22.5154	0	0	0
2	164440640	164440640	G	T	SNP	Wfdc6b	NM_001012725.2	mouse	genbank	58_37k	1	validated	intronic	c.226+115	e2+115	-	-	-	-	no_errors	Unknown	Unknown	Unknown	58	0	0	30	24	44.44	Somatic	1	20.5141	0	0	0
2	164653093	164653093	G	T	SNP	1700020C07Rik	ENSMUST00000017911	mouse	ensembl	58_37k	-1	known	missense	c.497	p.P166H	-	NULL	NULL	-	no_errors	Unknown	Unknown	Unknown	33	0	0	36	15	28.85	Somatic	0.999722	8.18718	0	0	0
2	164669895	164669895	G	T	SNP	Pltp	NM_011125.2	mouse	genbank	58_37k	-1	validated	intronic	c.1175+40	e11+40	-	-	-	-	no_errors	Unknown	Unknown	Unknown	40	0	0	10	28	73.68	Somatic	1	28.6177	0	2	100
2	164727830	164727830	C	A	SNP	Zfp335	NM_199027.2	mouse	genbank	58_37k	-1	validated	missense	c.1414	p.G472C	-	PatternScan_ZINC_FINGER_C2H2_1,HMMSmart_ZnF_C2H2	HMMPfam_zf-C2H2,PatternScan_ZINC_FINGER_C2H2_1,HMMSmart_ZnF_C2H2,superfamily_SSF57667	-	no_errors	Unknown	Unknown	Unknown	35	0	0	27	32	54.24	Somatic	1	19.2485	32	85	72.65
2	164730429	164730429	C	G	SNP	Zfp335	NM_199027.2	mouse	genbank	58_37k	-1	validated	missense	c.1029	p.Q343H	-	NULL	HMMPfam_zf-C2H2,PatternScan_ZINC_FINGER_C2H2_1,HMMSmart_ZnF_C2H2,superfamily_SSF57667	-	no_errors	Unknown	Unknown	Unknown	49	0	0	56	36	39.13	Somatic	1	18.032	78	35	30.97
2	164818112	164818117	GTGTGC	-	DEL	Slc12a5	NM_020333.2	mouse	genbank	58_37k	1	validated	intronic	c.2377+106_2377+101	e18+106	-	-	-	-	no_errors	Unknown	Unknown	Unknown	NA	NA	NA	NA	NA	NA	Somatic	NA	NA	NA	NA	NA
2	164949322	164949322	C	A	SNP	Cdh22	NM_174988.3	mouse	genbank	58_37k	-1	validated	missense	c.1436	p.R479L	-	HMMPfam_Cadherin,HMMSmart_SM00112,superfamily_Cadherin-like	HMMPfam_Cadherin_C,HMMPfam_Cadherin,HMMSmart_SM00112,PatternScan_CADHERIN_1,superfamily_Cadherin-like	-	no_errors	Unknown	Unknown	Unknown	61	0	0	32	48	60	Somatic	1	35.9717	0	0	0
2	165550366	165550366	C	A	SNP	Eya2	NM_010165.2	mouse	genbank	58_37k	1	provisional	intronic	c.786+50	e7+50	-	-	-	-	no_errors	Unknown	Unknown	Unknown	29	0	0	19	22	53.66	Somatic	1	14.9734	0	0	0
2	165589402	165589402	C	T	SNP	Eya2	NM_010165.2	mouse	genbank	58_37k	1	provisional	intronic	c.1180+45	e11+45	-	-	-	-	no_errors	Unknown	Unknown	Unknown	18	0	0	11	18	62.07	Somatic	0.999991	11.8497	0	0	0
2	165668199	165668199	C	T	SNP	Zmynd8	NM_027230.3	mouse	genbank	58_37k	-1	provisional	intronic	c.579+65	e6+65	-	-	-	-	no_errors	Unknown	Unknown	Unknown	32	0	0	38	17	30.91	Somatic	0.999824	8.64268	4	1	20
2	166417884	166417884	C	A	SNP	Prex1	NM_177782.3	mouse	genbank	58_37k	-1	validated	intronic	c.1960-35	e18-35	-	-	-	-	no_errors	Unknown	Unknown	Unknown	42	0	0	19	15	44.12	Somatic	0.999999	13.9984	0	0	0
2	166458846	166458846	C	T	SNP	Prex1	NM_177782.3	mouse	genbank	58_37k	-1	validated	intronic	c.606+20	e5+20	-	-	-	-	no_errors	Unknown	Unknown	Unknown	38	0	0	27	34	52.31	Somatic	1	21.4241	0	0	0
2	166853292	166853292	G	T	SNP	Ddx27	ENSMUST00000126409	mouse	ensembl	58_37k	1	known	3_prime_untranslated_region	c.*166853292	NULL	-	-	-	-	no_coding_region	Unknown	Unknown	Unknown	49	0	0	59	34	36.56	Somatic	1	16.6078	3	0	0
2	166853845	166853845	C	A	SNP	Ddx27	NM_153065.3	mouse	genbank	58_37k	1	provisional	silent	c.1332	p.R444	-	HMMSmart_HELICc,superfamily_SSF52540	PatternScan_DEAD_ATP_HELICASE,HMMPfam_Helicase_C,HMMSmart_HELICc,HMMPfam_DEAD,HMMSmart_DEXDc,superfamily_SSF52540	-	no_errors	Unknown	Unknown	Unknown	70	0	0	35	84	70.59	Somatic	1	57.0423	243	334	57.69
2	167364270	167364270	G	T	SNP	Snai1	NM_011427.2	mouse	genbank	58_37k	1	provisional	missense	c.182	p.W61L	-	NULL	HMMPfam_zf-C2H2,PatternScan_ZINC_FINGER_C2H2_1,HMMSmart_SM00355,superfamily_C2H2 and C2HC zinc fingers	-	no_errors	Unknown	Unknown	Unknown	48	0	0	31	73	70.19	Somatic	1	41.398	26	73	73.74
2	167814759	167814759	A	G	SNP	Fam65c	NM_001080708.2	mouse	genbank	58_37k	-1	predicted	silent	c.1621	p.L541	-	NULL	superfamily_ARM-type_fold	-	no_errors	Unknown	Unknown	Unknown	33	0	0	12	13	52	Somatic	0.999998	13.2212	0	2	100
2	168507622	168507622	C	G	SNP	Atp9a	NM_015731.3	mouse	genbank	58_37k	-1	validated	intronic	c.724-71	e9-71	-	-	-	-	no_errors	Unknown	Unknown	Unknown	37	0	0	34	24	41.38	Somatic	0.999999	13.9867	0	0	0
2	168575924	168575924	C	A	SNP	Sall4	NM_175303.3	mouse	genbank	58_37k	-1	validated	missense	c.2809	p.A937S	-	NULL	PatternScan_PHOSPHOPANTETHEINE,HMMPfam_zf-C2H2,PatternScan_ZINC_FINGER_C2H2_1,HMMSmart_ZnF_C2H2,superfamily_SSF57667	-	no_errors	Unknown	Unknown	Unknown	15	0	0	38	17	30.91	Somatic	0.990466	4.64339	0	0	0
2	168580681	168580681	G	C	SNP	Sall4	NM_175303.3	mouse	genbank	58_37k	-1	validated	missense	c.1738	p.R580G	-	PatternScan_ZINC_FINGER_C2H2_1,HMMSmart_ZnF_C2H2	PatternScan_PHOSPHOPANTETHEINE,HMMPfam_zf-C2H2,PatternScan_ZINC_FINGER_C2H2_1,HMMSmart_ZnF_C2H2,superfamily_SSF57667	-	no_errors	Unknown	Unknown	Unknown	31	0	0	20	28	58.33	Somatic	1	18.4487	0	0	0
2	168590559	168590559	G	A	SNP	Sall4	NM_175303.3	mouse	genbank	58_37k	-1	validated	intronic	c.118+1853	e1+1853	-	-	-	-	no_errors	Unknown	Unknown	Unknown	9	0	0	9	8	47.06	Somatic	0.983269	4.20376	0	0	0
2	170246026	170246026	G	T	SNP	Bcas1	NM_029815.2	mouse	genbank	58_37k	-1	validated	intronic	c.72+65	e1+65	-	-	-	-	no_errors	Unknown	Unknown	Unknown	61	0	0	28	55	66.27	Somatic	1	42.0894	0	0	0
2	172074876	172074876	G	T	SNP	Mc3r	NM_008561.3	mouse	genbank	58_37k	1	provisional	missense	c.517	p.G173C	-	HMMPfam_7tm_1,superfamily_Family A G protein-coupled receptor-like	HMMPfam_7tm_1,PatternScan_G_PROTEIN_RECEP_F1_1,superfamily_Family A G protein-coupled receptor-like	-	no_errors	Unknown	Unknown	Unknown	128	0	0	64	95	59.75	Somatic	1	73.7586	0	0	0
2	172198593	172198593	G	T	SNP	Cstf1	NM_024199.2	mouse	genbank	58_37k	1	provisional	missense	c.133	p.A45S	-	NULL	HMMSmart_SM00320,superfamily_WD40 repeat-like,PatternScan_WD_REPEATS_1,HMMPfam_WD40	-	no_errors	Unknown	Unknown	Unknown	44	0	0	49	34	40.96	Somatic	1	17.1732	245	164	40.1
2	172255128	172255129	-	T	INS	Cass4	NM_001080820.1	mouse	genbank	58_37k	1	provisional	intronic	c.1927-14_1927-13	e6-13	-	-	-	-	no_errors	Unknown	Unknown	Unknown	16	0	0	10	4	28.57	Somatic	0.962404	3.24365	0	0	0
2	172255239	172255239	A	C	SNP	Cass4	NM_001080820.1	mouse	genbank	58_37k	1	provisional	intronic	c.2004+20	e6+20	-	-	-	-	no_errors	Unknown	Unknown	Unknown	5	0	0	2	8	80	Somatic	0.989925	5.30957	0	0	0
2	172704951	172704951	C	A	SNP	Bmp7	NM_007557.2	mouse	genbank	58_37k	-1	provisional	silent	c.831	p.V277	-	HMMPfam_TGFb_propeptide	HMMPfam_TGFb_propeptide,HMMPfam_TGF_beta,HMMSmart_SM00204,PatternScan_TGF_BETA_1,superfamily_Cystine-knot cytokines	-	no_errors	Unknown	Unknown	Unknown	67	0	0	47	29	38.16	Somatic	1	20.908	0	0	0
2	172984219	172984219	G	C	SNP	Pck1	NM_011044.2	mouse	genbank	58_37k	1	provisional	3_prime_untranslated_region	c.*72	NULL	-	-	-	-	no_errors	Unknown	Unknown	Unknown	10	0	0	6	4	40	Somatic	0.959156	3.17743	0	0	0
2	173351636	173351636	G	T	SNP	1700021F07Rik	ENSMUST00000029023	mouse	ensembl	58_37k	1	known	intronic	c.150+50	e2+50	-	-	-	-	no_errors	Unknown	Unknown	Unknown	9	0	0	8	14	63.64	Somatic	0.997991	6.83112	0	0	0
2	173403500	173403500	G	A	SNP	1700030G11Rik	XM_130735.7	mouse	genbank	58_37k	-1	model	silent	c.343	p.L115	-	superfamily_ANK	HMMPfam_Ank,HMMSmart_ANK,superfamily_ANK	-	no_errors	Unknown	Unknown	Unknown	54	0	0	19	45	70.31	Somatic	1	38.9704	0	0	0
2	173485005	173485005	C	A	SNP	Ppp4r1l	ENSMUST00000133185	mouse	ensembl	58_37k	-1	known	5_prime_untranslated_region	c.-173485005	NULL	-	-	-	-	no_coding_region	Unknown	Unknown	Unknown	25	0	0	3	14	82.35	Somatic	1	18.5603	0	0	0
2	173487083	173487083	G	T	SNP	Rab22a	NM_024436.3	mouse	genbank	58_37k	1	provisional	intronic	c.116+71	e2+71	-	-	-	-	no_errors	Unknown	Unknown	Unknown	28	0	0	15	27	64.29	Somatic	1	19.0203	5	3	37.5
2	174125011	174125011	C	A	SNP	Gnas	NM_010309.3	mouse	genbank	58_37k	1	reviewed	missense	c.1649	p.P550H	-	NULL	HMMPfam_G-alpha,superfamily_Transducin (alpha subunit) insertion domain,HMMSmart_SM00275,superfamily_P-loop containing nucleoside triphosphate hydrolases	-	no_errors	Unknown	Unknown	Unknown	27	0	0	9	26	74.29	Somatic	1	21.9421	0	0	0
2	174171709	174171709	G	T	SNP	Gnas	NM_010309.3	mouse	genbank	58_37k	1	reviewed	intronic	c.3256-34	e12-34	-	-	-	-	no_errors	Unknown	Unknown	Unknown	75	0	0	50	22	30.56	Somatic	1	16.9818	3	0	0
2	174471613	174471613	C	G	SNP	Zfp831	ENSMUST00000059452	mouse	ensembl	58_37k	1	known	nonsense	c.2579	p.S860*	-	NULL	HMMPfam_zf-C2H2,PatternScan_ZINC_FINGER_C2H2_1,HMMSmart_ZnF_C2H2,superfamily_SSF57667	-	no_errors	Unknown	Unknown	Unknown	24	0	0	10	22	68.75	Somatic	1	17.4045	0	0	0
2	174483275	174483275	G	T	SNP	Zfp831	ENSMUST00000059452	mouse	ensembl	58_37k	1	known	missense	c.3884	p.R1295L	-	NULL	HMMPfam_zf-C2H2,PatternScan_ZINC_FINGER_C2H2_1,HMMSmart_ZnF_C2H2,superfamily_SSF57667	-	no_errors	Unknown	Unknown	Unknown	24	0	0	21	12	36.36	Somatic	0.999426	7.46312	0	0	0
2	174604266	174604266	G	C	SNP	Edn3	NM_007903.3	mouse	genbank	58_37k	1	provisional	splice_site	c.542+1	e3+1	-	-	-	-	no_errors	Unknown	Unknown	Unknown	21	0	0	13	24	64.86	Somatic	1	15.1388	0	0	0
2	174835714	174835714	C	A	SNP	ENSMUSG00000078906	ENSMUST00000109070	mouse	ensembl	58_37k	1	known	5_prime_flanking_region	c.-106	NULL	-	-	-	-	no_errors	Unknown	Unknown	Unknown	75	0	0	56	26	31.71	Somatic	1	18.4947	0	0	0
2	178013612	178013612	G	T	SNP	Phactr3	NM_028806.2	mouse	genbank	58_37k	1	validated	silent	c.549	p.P183	-	NULL	HMMPfam_RPEL,HMMSmart_SM00707	-	no_errors	Unknown	Unknown	Unknown	88	0	0	42	36	46.15	Somatic	1	32.0849	0	0	0
2	178127025	178127025	G	T	SNP	Sycp2	NM_177191.3	mouse	genbank	58_37k	-1	validated	intronic	c.876+23	e11+23	-	-	-	-	no_errors	Unknown	Unknown	Unknown	20	0	0	11	10	47.62	Somatic	0.999678	8.04372	0	0	0
2	178129704	178129704	A	C	SNP	Sycp2	NM_177191.3	mouse	genbank	58_37k	-1	validated	intronic	c.600-16	e8-16	-	-	-	-	no_errors	Unknown	Unknown	Unknown	146	0	0	42	19	31.15	Somatic	1	24.1732	0	0	0
2	179151222	179151222	G	A	SNP	4930591A17Rik	ENSMUST00000041998	mouse	ensembl	58_37k	1	known	missense	c.127	p.G43S	-	NULL	NULL	-	no_errors	Unknown	Unknown	Unknown	41	0	0	21	21	50	Somatic	1	17.4222	0	0	0
2	179920571	179920571	G	A	SNP	Lama5	NM_001081171.2	mouse	genbank	58_37k	-1	validated	missense	c.6602	p.S2201F	-	superfamily_ConA_like_lec_gl,HMMPfam_Laminin_I	HMMPfam_Laminin_B,PatternScan_TNFR_NGFR_1,HMMSmart_LamG,HMMPfam_Laminin_EGF,HMMSmart_EGF_Lam,PatternScan_EGF_LAM_1,HMMPfam_Laminin_N,HMMSmart_LamNT,superfamily_Gal_bind_like,superfamily_ConA_like_lec_gl,HMMPfam_Laminin_I,HMMPfam_Laminin_II,HMMPfam_Laminin	-	no_errors	Unknown	Unknown	Unknown	47	0	0	26	20	43.48	Somatic	1	16.4489	124	53	29.94
2	179925344	179925344	C	A	SNP	Lama5	NM_001081171.2	mouse	genbank	58_37k	-1	validated	splice_site	c.5115+1	e38+1	-	-	-	-	no_errors	Unknown	Unknown	Unknown	44	0	0	22	32	59.26	Somatic	1	24.9652	3	7	70
2	179930937	179930937	C	A	SNP	Lama5	NM_001081171.2	mouse	genbank	58_37k	-1	validated	missense	c.2690	p.G897V	-	superfamily_ConA_like_lec_gl	HMMPfam_Laminin_B,PatternScan_TNFR_NGFR_1,HMMSmart_LamG,HMMPfam_Laminin_EGF,HMMSmart_EGF_Lam,PatternScan_EGF_LAM_1,HMMPfam_Laminin_N,HMMSmart_LamNT,superfamily_Gal_bind_like,superfamily_ConA_like_lec_gl,HMMPfam_Laminin_I,HMMPfam_Laminin_II,HMMPfam_Laminin	-	no_errors	Unknown	Unknown	Unknown	58	0	0	49	30	37.97	Somatic	1	18.9746	56	144	72
2	180014099	180014099	G	T	SNP	BC066135	NM_173031.3	mouse	genbank	58_37k	-1	validated	missense	c.1196	p.P399H	-	NULL	HMMPfam_CtIP_N	-	no_errors	Unknown	Unknown	Unknown	24	0	0	19	14	42.42	Somatic	0.999881	9.0407	0	0	0
2	180202256	180202256	G	A	SNP	Slco4a1	NM_148933.1	mouse	genbank	58_37k	1	provisional	intronic	c.1016-16	e4-16	-	-	-	-	no_errors	Unknown	Unknown	Unknown	22	0	0	16	19	54.29	Somatic	0.999993	11.9288	1	0	0
2	180406973	180406973	C	A	SNP	Dido1	NM_175551.3	mouse	genbank	58_37k	-1	validated	intronic	c.2563+15	e9+15	-	-	-	-	no_errors	Unknown	Unknown	Unknown	96	0	0	35	35	50	Somatic	1	36.0168	0	1	100
2	180409972	180409972	T	A	SNP	Dido1	NM_175551.3	mouse	genbank	58_37k	-1	validated	silent	c.1746	p.P582	-	NULL	HMMSmart_SM00249,HMMPfam_TFIIS_M,superfamily_Elongation factor TFIIS domain 2,superfamily_FYVE/PHD zinc finger,HMMPfam_SPOC,HMMSmart_SM00510,PatternScan_ZF_PHD_1,HMMPfam_PHD	-	no_errors	Unknown	Unknown	Unknown	26	0	0	18	22	55	Somatic	0.999999	14.2231	83	66	43.71
2	180422074	180422074	C	G	SNP	Dido1	NM_175551.3	mouse	genbank	58_37k	-1	validated	intronic	c.1152+107	e2+107	-	-	-	-	no_errors	Unknown	Unknown	Unknown	8	0	0	3	6	66.67	Somatic	0.992155	5.22819	5	4	44.44
2	180474549	180474549	T	G	SNP	Slc17a9	NM_183161.3	mouse	genbank	58_37k	1	validated	missense	c.1004	p.I335S	-	HMMPfam_MFS_1,superfamily_MFS_gen_substrate_transporter	PatternScan_SUGAR_TRANSPORT_2,HMMPfam_MFS_1,superfamily_MFS_gen_substrate_transporter	-	no_errors	Unknown	Unknown	Unknown	51	0	0	26	21	44.68	Somatic	1	18.0948	0	1	100
2	180708249	180708249	A	T	SNP	Arfgap1	NM_145760.3	mouse	genbank	58_37k	1	validated	missense	c.527	p.Q176L	-	NULL	HMMPfam_ArfGap,HMMSmart_SM00105,superfamily_Pyk2-associated protein beta ARF-GAP domain	-	no_errors	Unknown	Unknown	Unknown	42	0	0	25	26	50.98	Somatic	1	19.344	87	72	45.28
2	180735089	180735089	T	A	SNP	Col20a1	ENSMUST00000108855	mouse	ensembl	58_37k	1	known	missense	c.2087	p.L696H	-	HMMPfam_fn3,HMMSmart_FN3,superfamily_FN_III-like	HMMPfam_VWA,HMMSmart_VWA,HMMSmart_TSPN,HMMPfam_fn3,HMMSmart_FN3,HMMPfam_Collagen,superfamily_FN_III-like,superfamily_ConA_like_lec_gl,superfamily_SSF53300	-	no_errors	Unknown	Unknown	Unknown	50	0	0	29	28	49.12	Somatic	1	21.5014	6	2	25
2	180750172	180750172	G	C	SNP	Col20a1	ENSMUST00000108855	mouse	ensembl	58_37k	1	known	splice_region	c.3654+5	e32+5	-	-	-	-	no_errors	Unknown	Unknown	Unknown	124	0	0	61	40	39.6	Somatic	1	36.2467	1	1	50
2	180816196	180816196	G	A	SNP	Kcnq2	ENSMUST00000103049	mouse	ensembl	58_37k	-1	known	missense	c.1948	p.P650S	-	NULL	HMMPfam_Ion_trans,HMMPfam_KCNQ_channel,superfamily_Voltage-gated potassium channels	-	pseudogene:no_stop_codon:bad_bp_length_for_coding_region	Unknown	Unknown	Unknown	71	0	0	41	46	52.87	Somatic	1	34.427	0	0	0
2	180922584	180922584	G	T	SNP	Ppdpf	NM_025598.2	mouse	genbank	58_37k	1	provisional	missense	c.126	p.Q42H	-	NULL	NULL	-	no_errors	Unknown	Unknown	Unknown	21	0	0	19	15	44.12	Somatic	0.99983	8.68517	168	173	50.58
2	180942503	180942503	C	A	SNP	Srms	NM_011481.3	mouse	genbank	58_37k	-1	validated	intronic	c.833-21	e5-21	-	-	-	-	no_errors	Unknown	Unknown	Unknown	98	0	0	55	68	55.28	Somatic	1	50.8567	0	0	0
2	181323062	181323062	C	A	SNP	Uckl1	ENSMUST00000108791	mouse	ensembl	58_37k	-1	known	intronic	c.1629+39	e7+39	-	-	-	-	no_errors	Unknown	Unknown	Unknown	68	0	0	33	27	45	Somatic	1	23.9734	0	1	100
2	181324743	181324743	C	A	SNP	Uckl1	ENSMUST00000108791	mouse	ensembl	58_37k	-1	known	silent	c.411	p.G137	-	NULL	HMMPfam_zf-C2H2,PatternScan_ZINC_FINGER_C2H2_1,HMMSmart_SM00355,superfamily_C2H2 and C2HC zinc fingers	-	no_errors	Unknown	Unknown	Unknown	58	0	0	66	8	10.81	Somatic	0.985909	4.24842	19	3	13.64
3	3634344	3634344	A	C	SNP	Hnf4g	ENSMUST00000108394	mouse	ensembl	58_37k	1	known	missense	c.133	p.N45H	-	NULL	HMMPfam_Hormone_recep,HMMSmart_SM00430,HMMPfam_zf-C4,HMMSmart_SM00399,PatternScan_NUCLEAR_REC_DBD_1,superfamily_Nuclear receptor ligand-binding domain,superfamily_Glucocorticoid receptor-like (DNA-binding domain)	-	no_errors	Unknown	Unknown	Unknown	29	0	0	9	14	60.87	Somatic	1	14.6036	0	0	0
3	9447469	9447469	C	A	SNP	Zfp704	NM_133218.2	mouse	genbank	58_37k	-1	validated	missense	c.1192	p.A398S	-	NULL	HMMPfam_zf-C2H2,PatternScan_ZINC_FINGER_C2H2_1,HMMSmart_ZnF_C2H2	-	no_errors	Unknown	Unknown	Unknown	36	0	0	25	11	30.56	Somatic	0.999741	8.26006	22	6	21.43
3	10387222	10387222	G	T	SNP	Chmp4c	NM_025519.2	mouse	genbank	58_37k	1	provisional	intronic	c.483+71	e3+71	-	-	-	-	no_errors	Unknown	Unknown	Unknown	30	0	0	14	16	53.33	Somatic	0.999999	13.7657	0	0	0
3	15410553	15410553	A	C	SNP	Sirpb1a	NM_001002898.	mouse	genbank	58_37k	-1	provisional	silent	c.921	p.T307	-	HMMPfam_C1-set,HMMSmart_IGc1,superfamily_SSF48726	HMMPfam_C1-set,HMMSmart_IGc1,HMMSmart_IG,HMMPfam_V-set,superfamily_SSF48726	-	no_errors	Unknown	Unknown	Unknown	213	0	0	170	22	11.4	Somatic	1	14.9828	0	0	0
3	15541739	15541739	G	A	SNP	ENSMUSG00000078781	ENSMUST00000091319	mouse	ensembl	58_37k	-1	known	intronic	c.1063+419	e4+419	-	-	-	-	no_errors	Unknown	Unknown	Unknown	46	0	0	8	13	61.9	Somatic	1	18.5475	0	0	0
3	18003704	18003704	C	A	SNP	Cyp7b1	NM_007825.4	mouse	genbank	58_37k	-1	validated	missense	c.250	p.V84L	-	superfamily_Cytochrome_P450	HMMPfam_p450,superfamily_Cytochrome_P450	-	no_errors	Unknown	Unknown	Unknown	75	0	0	32	34	51.52	Somatic	1	31.415	0	0	0
3	19976598	19976598	G	A	SNP	Hltf	NM_009210.2	mouse	genbank	58_37k	1	validated	intronic	c.1151+14	e10+14	-	-	-	-	no_errors	Unknown	Unknown	Unknown	21	0	0	14	11	44	Somatic	0.999645	7.94417	0	0	0
3	20139356	20139356	T	A	SNP	Cpa3	NM_007753.2	mouse	genbank	58_37k	-1	validated	intronic	c.269+97	e3+97	-	-	-	-	no_errors	Unknown	Unknown	Unknown	33	0	0	10	12	54.55	Somatic	0.999998	13.363	0	0	0
3	26739496	26739496	T	A	SNP	Spata16	NM_029150.4	mouse	genbank	58_37k	1	validated	intronic	c.852-81	e4-81	-	-	-	-	no_errors	Unknown	Unknown	Unknown	9	0	0	4	8	66.67	Somatic	0.996949	6.22647	0	0	0
3	26812132	26812132	C	G	SNP	Spata16	NM_029150.4	mouse	genbank	58_37k	1	validated	missense	c.1108	p.P370A	-	NULL	superfamily_TPR-like	-	no_errors	Unknown	Unknown	Unknown	64	0	0	34	20	37.04	Somatic	1	17.4619	0	0	0
3	27040647	27040647	T	A	SNP	Ect2	NM_007900.3	mouse	genbank	58_37k	-1	validated	intronic	c.160-26	e3-26	-	-	-	-	no_errors	Unknown	Unknown	Unknown	43	0	0	22	16	42.11	Somatic	0.999999	13.9577	3	0	0
3	27124886	27124886	G	A	SNP	Nceh1	NM_178772.3	mouse	genbank	58_37k	1	provisional	intronic	c.368-109	e3-109	-	-	-	-	no_errors	Unknown	Unknown	Unknown	24	0	0	14	13	48.15	Somatic	0.999955	10.0128	1	0	0
3	28797654	28797654	C	A	SNP	Gm1527	NM_001033479.4	mouse	genbank	58_37k	1	predicted	silent	c.180	p.I60	-	HMMPfam_PH,HMMSmart_PH,superfamily_SSF50729	HMMPfam_RA,HMMPfam_RhoGAP,HMMSmart_RhoGAP,HMMPfam_PH,HMMSmart_PH,superfamily_Rho_GAP,superfamily_SSF50729	-	no_errors	Unknown	Unknown	Unknown	141	0	0	53	44	45.36	Somatic	1	45.6973	0	0	0
3	28820596	28820596	G	A	SNP	Gm1527	NM_001033479.4	mouse	genbank	58_37k	1	predicted	splice_region	c.1704+5	e13+5	-	-	-	-	no_errors	Unknown	Unknown	Unknown	71	1	1.39	30	27	47.37	Somatic	1	22.7378	0	0	0
3	30498634	30498634	C	A	SNP	Arpm1	NM_029690.2	mouse	genbank	58_37k	-1	provisional	missense	c.138	p.R46S	-	HMMPfam_Actin,HMMSmart_SM00268,superfamily_Actin-like ATPase domain	HMMPfam_Actin,HMMSmart_SM00268,superfamily_Actin-like ATPase domain	-	no_errors	Unknown	Unknown	Unknown	63	0	0	26	23	46.94	Somatic	1	22.3614	0	0	0
3	30505990	30505990	G	A	SNP	Mynn	NM_030557.2	mouse	genbank	58_37k	1	provisional	missense	c.298	p.D100N	-	HMMSmart_SM00225,superfamily_POZ domain,HMMPfam_BTB	HMMSmart_SM00225,HMMPfam_zf-C2H2,PatternScan_ZINC_FINGER_C2H2_1,superfamily_POZ domain,HMMPfam_BTB,HMMSmart_SM00355,superfamily_C2H2 and C2HC zinc fingers	-	no_errors	Unknown	Unknown	Unknown	31	0	0	12	11	47.83	Somatic	0.999984	11.0645	32	28	46.67
3	30652013	30652013	C	A	SNP	Samd7	ENSMUST00000108262	mouse	ensembl	58_37k	1	known	splice_region	c.87-9	e2-9	-	-	-	-	no_errors	Unknown	Unknown	Unknown	318	1	0.31	120	121	50.21	Somatic	1	118.695	0	0	0
3	30868350	30868350	C	A	SNP	Phc3	NM_153421.2	mouse	genbank	58_37k	-1	validated	5_prime_flanking_region	c.-3515	NULL	-	-	-	-	no_errors	Unknown	Unknown	Unknown	157	0	0	97	73	42.69	Somatic	1	55.9174	0	0	0
3	32614456	32614456	A	T	SNP	Actl6a	NM_019673.2	mouse	genbank	58_37k	1	validated	intronic	c.476+21	e5+21	-	-	-	-	no_errors	Unknown	Unknown	Unknown	149	0	0	62	63	50.4	Somatic	1	59.6006	4	2	33.33
3	33713211	33713211	A	G	SNP	Ttc14	NM_027619.3	mouse	genbank	58_37k	1	validated	3_prime_untranslated_region	c.*4700	NULL	-	-	-	-	no_errors	Unknown	Unknown	Unknown	70	0	0	15	11	42.31	Somatic	1	15.7588	22	10	31.25
3	33714283	33714283	G	T	SNP	Ttc14	NM_027619.3	mouse	genbank	58_37k	1	validated	3_prime_untranslated_region	c.*5772	NULL	-	-	-	-	no_errors	Unknown	Unknown	Unknown	160	0	0	38	45	54.22	Somatic	1	57.5935	0	0	0
3	35730432	35730432	A	T	SNP	Atp11b	NM_029570.3	mouse	genbank	58_37k	1	validated	missense	c.2651	p.K884M	-	NULL	HMMPfam_Hydrolase,HMMPfam_E1-E2_ATPase,PatternScan_ATPASE_E1_E2,superfamily_SSF56784,superfamily_SSF81653,superfamily_SSF81660	-	no_errors	Unknown	Unknown	Unknown	68	0	0	25	16	39.02	Somatic	1	17.3572	54	1	1.82
3	35730434	35730434	G	C	SNP	Atp11b	NM_029570.3	mouse	genbank	58_37k	1	validated	splice_site	c.2652+1	e22+1	-	-	-	-	no_errors	Unknown	Unknown	Unknown	70	0	0	25	16	39.02	Somatic	1	17.6515	0	1	100
3	35896479	35896479	T	G	SNP	Mccc1	NM_023644.4	mouse	genbank	58_37k	-1	validated	missense	c.92	p.K31T	-	NULL	HMMPfam_Biotin_lipoyl,PatternScan_BIOTIN,HMMPfam_CPSase_L_D2,PatternScan_CPSASE_2,HMMPfam_CPSase_L_chain,HMMPfam_Biotin_carb_C,superfamily_Hybrid_motif,superfamily_Rudmnt_hyb_motif,superfamily_PreATP-grasp-like,superfamily_SSF56059	-	no_errors	Unknown	Unknown	Unknown	176	0	0	79	50	38.76	Somatic	1	48.1746	24	18	41.86
3	36080053	36080053	A	T	SNP	Qrfpr	NM_198192.2	mouse	genbank	58_37k	-1	provisional	intronic	c.798-89	e5-89	-	-	-	-	no_errors	Unknown	Unknown	Unknown	33	0	0	10	13	56.52	Somatic	0.999999	14.2659	0	0	0
3	36364127	36364127	C	T	SNP	Anxa5	NM_009673.2	mouse	genbank	58_37k	-1	validated	intronic	c.88+46	e2+46	-	-	-	-	no_errors	Unknown	Unknown	Unknown	45	0	0	13	18	58.06	Somatic	1	20.0685	0	0	0
3	36569946	36569946	C	G	SNP	Trpc3	NM_019510.2	mouse	genbank	58_37k	-1	validated	missense	c.580	p.D194H	-	HMMPfam_TRP_2	HMMPfam_Ank,HMMSmart_ANK,superfamily_ANK,HMMPfam_Ion_trans,HMMPfam_TRP_2	-	no_errors	Unknown	Unknown	Unknown	86	0	0	35	48	57.83	Somatic	1	43.4713	0	0	0
3	36794404	36794404	G	T	SNP	4932438A13Rik	ENSMUST00000152564	mouse	ensembl	58_37k	1	known	intronic	c.1209+67	e10+67	-	-	-	-	no_errors	Unknown	Unknown	Unknown	17	0	0	4	10	71.43	Somatic	0.99998	10.9462	2	0	0
3	38856008	38856008	C	A	SNP	Fat4	NM_183221.3	mouse	genbank	58_37k	1	validated	missense	c.6334	p.L2112M	-	HMMPfam_Cadherin,HMMSmart_SM00112,superfamily_Cadherin-like	PatternScan_ASX_HYDROXYL,HMMSmart_SM00282,HMMSmart_SM00179,HMMPfam_Cadherin,HMMSmart_SM00112,PatternScan_CADHERIN_1,HMMPfam_EGF,HMMSmart_SM00181,superfamily_Concanavalin A-like lectins/glucanases,HMMPfam_Laminin_G_2,PatternScan_EGF_1,PatternScan_EGF_2,HMM	-	no_errors	Unknown	Unknown	Unknown	143	0	0	83	5	5.62	Somatic	0.96129	3.47851	1	0	0
3	38856633	38856633	G	T	SNP	Fat4	NM_183221.3	mouse	genbank	58_37k	1	validated	intronic	c.6843+116	e5+116	-	-	-	-	no_errors	Unknown	Unknown	Unknown	14	0	0	6	10	62.5	Somatic	0.999726	8.36971	1	0	0
3	38882507	38882507	G	A	SNP	Fat4	NM_183221.3	mouse	genbank	58_37k	1	validated	silent	c.11385	p.Q3795	-	NULL	PatternScan_ASX_HYDROXYL,HMMSmart_SM00282,HMMSmart_SM00179,HMMPfam_Cadherin,HMMSmart_SM00112,PatternScan_CADHERIN_1,HMMPfam_EGF,HMMSmart_SM00181,superfamily_Concanavalin A-like lectins/glucanases,HMMPfam_Laminin_G_2,PatternScan_EGF_1,PatternScan_EGF_2,HMM	-	no_errors	Unknown	Unknown	Unknown	59	0	0	23	24	51.06	Somatic	1	23.54	1	0	0
3	40589303	40589303	G	T	SNP	Hspa4l	NM_011020.3	mouse	genbank	58_37k	1	provisional	nonsense	c.2149	p.E717*	-	superfamily_Heat shock protein 70kD (HSP70) C-terminal subdomain	HMMPfam_HSP70,PatternScan_HSP70_2,PatternScan_HSP70_3,superfamily_Heat shock protein 70kD (HSP70) peptide-binding domain,superfamily_Heat shock protein 70kD (HSP70) C-terminal subdomain,superfamily_Actin-like ATPase domain	-	no_errors	Unknown	Unknown	Unknown	43	0	0	6	14	70	Somatic	1	20.722	215	29	11.89
3	45183386	45183386	G	C	SNP	Pcdh10	NM_011043.3	mouse	genbank	58_37k	1	validated	missense	c.212	p.G71A	-	HMMSmart_CA,HMMPfam_Cadherin_2,superfamily_Cadherin	HMMPfam_Cadherin,HMMSmart_CA,PatternScan_CADHERIN_1,HMMPfam_Cadherin_2,superfamily_Cadherin	-	no_errors	Unknown	Unknown	Unknown	42	0	0	10	13	56.52	Somatic	1	16.3579	0	0	0
3	51195674	51195674	C	A	SNP	4930583H14Rik	NM_026358.3	mouse	genbank	58_37k	-1	validated	intronic	c.186+73	e2+73	-	-	-	-	no_errors	Unknown	Unknown	Unknown	71	0	0	27	43	61.43	Somatic	1	39.3277	0	0	0
3	52788722	52788722	G	T	SNP	Cog6	NM_026225.3	mouse	genbank	58_37k	-1	validated	intronic	c.1670+1601	e17+1601	-	-	-	-	no_errors	Unknown	Unknown	Unknown	14	0	0	5	5	50	Somatic	0.994496	5.20959	4	1	20
3	53301917	53301917	C	A	SNP	Stoml3	NM_153156.1	mouse	genbank	58_37k	1	provisional	missense	c.96	p.F32L	-	NULL	HMMPfam_Band_7,HMMSmart_SM00244,PatternScan_BAND_7	-	no_errors	Unknown	Unknown	Unknown	128	0	0	43	80	64.52	Somatic	1	76.2107	0	0	0
3	53320777	53320777	C	A	SNP	Frem2	NM_172862.3	mouse	genbank	58_37k	-1	validated	missense	c.9160	p.G3054W	-	NULL	HMMPfam_Calx-beta,HMMSmart_SM00237	-	no_errors	Unknown	Unknown	Unknown	123	0	0	67	70	51.09	Somatic	1	55.2835	0	0	0
3	53540936	53540936	G	T	SNP	ENSMUSG00000074599	ENSMUST00000099100	mouse	ensembl	58_37k	1	known	3_prime_untranslated_region	c.*317	NULL	-	-	-	-	no_errors	Unknown	Unknown	Unknown	46	0	0	16	13	44.83	Somatic	0.999999	14.1768	0	0	0
3	54510835	54510835	G	C	SNP	Fam48a	NM_019995.3	mouse	genbank	58_37k	1	provisional	missense	c.453	p.Q151H	-	NULL	NULL	-	no_errors	Unknown	Unknown	Unknown	75	0	0	30	30	50	Somatic	1	29.1677	99	113	53.3
3	55435950	55435950	G	T	SNP	Nbea	ENSMUST00000029374	mouse	ensembl	58_37k	-1	known	missense	c.8311	p.H2771N	-	HMMSmart_SM00320,superfamily_WD40 repeat-like	HMMPfam_Beach,superfamily_BEACH domain,HMMSmart_SM00320,superfamily_Concanavalin A-like lectins/glucanases,HMMPfam_DUF1088,superfamily_WD40 repeat-like,superfamily_ARM repeat,HMMPfam_WD40,superfamily_PH domain-like	-	no_errors	Unknown	Unknown	Unknown	112	0	0	54	57	51.35	Somatic	1	48.731	7	23	76.67
3	55813151	55813151	C	G	SNP	Nbea	ENSMUST00000029374	mouse	ensembl	58_37k	-1	known	missense	c.2609	p.R870P	-	superfamily_ARM repeat	HMMPfam_Beach,superfamily_BEACH domain,HMMSmart_SM00320,superfamily_Concanavalin A-like lectins/glucanases,HMMPfam_DUF1088,superfamily_WD40 repeat-like,superfamily_ARM repeat,HMMPfam_WD40,superfamily_PH domain-like	-	no_errors	Unknown	Unknown	Unknown	11	0	0	6	4	40	Somatic	0.966792	3.3845	37	23	38.33
3	58835465	58835465	C	G	SNP	Med12l	ENSMUST00000029393	mouse	ensembl	58_37k	1	known	splice_region	c.100-3	e2-3	-	-	-	-	no_errors	Unknown	Unknown	Unknown	63	0	0	28	27	49.09	Somatic	1	24.7178	0	0	0
3	59555978	59555978	C	T	SNP	4930449A18Rik	ENSMUST00000094228	mouse	ensembl	58_37k	1	known	5_prime_flanking_region	c.-26040	NULL	-	-	-	-	no_errors	Unknown	Unknown	Unknown	154	0	0	54	44	44.9	Somatic	1	47.7388	0	0	0
3	59890652	59890652	C	A	SNP	Sucnr1	NM_032400.2	mouse	genbank	58_37k	1	validated	silent	c.678	p.P226	-	HMMPfam_7tm_1,superfamily_SSF81321	HMMPfam_7tm_1,PatternScan_G_PROTEIN_RECEP_F1_1,superfamily_SSF81321	-	no_errors	Unknown	Unknown	Unknown	32	0	0	12	9	42.86	Somatic	0.999924	9.48343	0	0	0
3	63523119	63523119	T	A	SNP	Plch1	NM_183191.3	mouse	genbank	58_37k	-1	validated	missense	c.1688	p.Q563L	-	superfamily_PLC-like_Pdiesterase_TIM-brl	HMMPfam_C2,HMMSmart_C2,HMMPfam_PI-PLC-X,HMMSmart_PLCXc,HMMPfam_PI-PLC-Y,HMMSmart_PLCYc,HMMPfam_PH,HMMSmart_PH,HMMSmart_EFh,superfamily_C2_CaLB,HMMPfam_efhand_like,superfamily_PLC-like_Pdiesterase_TIM-brl,PatternScan_EF_HAND_1,HMMPfam_efhand,superfamily_SS	-	no_errors	Unknown	Unknown	Unknown	54	0	0	13	21	61.76	Somatic	1	25.1966	0	0	0
3	63757982	63757982	T	G	SNP	Slc33a1	NM_015728.4	mouse	genbank	58_37k	-1	provisional	intronic	c.776-56	e2-56	-	-	-	-	no_errors	Unknown	Unknown	Unknown	27	0	0	6	11	64.71	Somatic	0.999999	13.4342	0	1	100
3	63920827	63920827	T	C	SNP	ENSMUSG00000043897	ENSMUST00000077958	mouse	ensembl	58_37k	-1	novel	missense	c.631	p.R211G	-	HMMPfam_7tm_3	HMMPfam_NCD3G,HMMPfam_7tm_3	-	no_errors	Unknown	Unknown	Unknown	410	0	0	285	43	13.11	Somatic	1	32.4221	0	0	0
3	64082838	64082838	A	T	SNP	ENSMUSG00000088735	ENSMUST00000158110	mouse	ensembl	58_37k	-1	novel	3_prime_flanking_region	c.*39491	NULL	-	-	-	-	no_errors	Unknown	Unknown	Unknown	298	0	0	134	98	42.24	Somatic	1	92.7374	0	0	0
3	64523519	64523519	G	T	SNP	Vmn2r7	NM_175674.3	mouse	genbank	58_37k	-1	provisional	silent	c.270	p.R90	-	HMMPfam_ANF_receptor,superfamily_SSF53822	HMMPfam_ANF_receptor,superfamily_SSF53822	-	no_errors	Unknown	Unknown	Unknown	270	0	0	86	104	54.74	Somatic	1	112.315	0	0	0
3	65187056	65187056	A	-	DEL	Ssr3	ENSMUST00000139785	mouse	ensembl	58_37k	-1	known	5_prime_untranslated_region	c.-65187056	NULL	-	-	-	-	no_coding_region	Unknown	Unknown	Unknown	34	0	0	6	6	50	Somatic	0.999894	9.15229	5	6	54.55
3	67235780	67235780	G	C	SNP	Gfm1	NM_138591.2	mouse	genbank	58_37k	1	validated	intronic	c.237+56	e2+56	-	-	-	-	no_errors	Unknown	Unknown	Unknown	11	0	0	9	5	35.71	Somatic	0.963274	3.27492	2	0	0
3	67403908	67403908	G	T	SNP	Mfsd1	NM_025813.3	mouse	genbank	58_37k	1	provisional	missense	c.1219	p.A407S	-	superfamily_MFS_gen_substrate_transporter	HMMPfam_MFS_1,superfamily_MFS_gen_substrate_transporter	-	no_errors	Unknown	Unknown	Unknown	105	0	0	42	41	49.4	Somatic	1	40.0206	263	338	56.24
3	68673977	68673977	T	A	SNP	1110032F04Rik	ENSMUST00000054551	mouse	ensembl	58_37k	1	known	silent	c.213	p.P71	-	NULL	NULL	-	no_errors	Unknown	Unknown	Unknown	22	0	0	13	10	43.48	Somatic	0.999618	7.8695	0	0	0
3	69026673	69026673	G	T	SNP	Arl14	ENSMUST00000029354	mouse	ensembl	58_37k	1	known	missense	c.230	p.C77F	-	HMMSmart_SM00175,HMMSmart_SM00178,HMMSmart_SM00177,HMMPfam_Arf,superfamily_P-loop containing nucleoside triphosphate hydrolases	HMMSmart_SM00175,HMMSmart_SM00178,HMMSmart_SM00177,PatternScan_ARF,HMMPfam_Arf,superfamily_P-loop containing nucleoside triphosphate hydrolases	-	no_errors	Unknown	Unknown	Unknown	85	0	0	41	37	47.44	Somatic	1	32.4887	0	0	0
3	69521009	69521009	C	T	SNP	Rpl32-ps	ENSMUST00000091052	mouse	ensembl	58_37k	-1	known	missense	c.307	p.V103M	-	HMMPfam_Ribosomal_L32e,superfamily_Ribosomal_L32e	HMMPfam_Ribosomal_L32e,superfamily_Ribosomal_L32e,PatternScan_RIBOSOMAL_L32E	-	no_errors	Unknown	Unknown	Unknown	162	0	0	76	71	48.3	Somatic	1	63.116	0	0	0
3	72756441	72756441	A	C	SNP	Sis	NM_001081137.1	mouse	genbank	58_37k	-1	provisional	missense	c.902	p.I301R	-	NULL	HMMPfam_Glyco_hydro_31,PatternScan_GLYCOSYL_HYDROL_F31_1,PatternScan_GLYCOSYL_HYDROL_F31_2,HMMPfam_Trefoil,HMMSmart_SM00018,superfamily_Trefoil,superfamily_(Trans)glycosidases,PatternScan_P_TREFOIL	-	no_errors	Unknown	Unknown	Unknown	42	0	0	9	9	50	Somatic	0.999996	12.4638	0	0	0
3	72854408	72854408	C	A	SNP	Slitrk3	NM_198864.2	mouse	genbank	58_37k	-1	provisional	missense	c.952	p.V318F	-	NULL	HMMSmart_LRRNT,HMMSmart_LRRCT,HMMPfam_LRR_1,HMMSmart_LRR_TYP,superfamily_SSF52058	-	no_errors	Unknown	Unknown	Unknown	65	0	0	18	26	59.09	Somatic	1	29.4622	0	0	0
3	73504890	73504890	G	A	SNP	Bche	NM_009738.3	mouse	genbank	58_37k	-1	validated	missense	c.1124	p.T375I	-	HMMPfam_COesterase,superfamily_SSF53474	HMMPfam_COesterase,HMMPfam_AChE_tetra,PatternScan_CARBOXYLESTERASE_B_2,PatternScan_CARBOXYLESTERASE_B_1,superfamily_SSF53474	-	no_errors	Unknown	Unknown	Unknown	86	0	0	58	15	20.55	Somatic	0.999992	11.7405	0	0	0
3	73505530	73505530	G	T	SNP	Bche	NM_009738.3	mouse	genbank	58_37k	-1	validated	missense	c.484	p.L162I	-	HMMPfam_COesterase,superfamily_SSF53474	HMMPfam_COesterase,HMMPfam_AChE_tetra,PatternScan_CARBOXYLESTERASE_B_2,PatternScan_CARBOXYLESTERASE_B_1,superfamily_SSF53474	-	no_errors	Unknown	Unknown	Unknown	80	0	0	33	26	44.07	Somatic	1	25.7031	0	0	0
3	74882496	74882496	G	T	SNP	Zbbx	NM_172515.2	mouse	genbank	58_37k	-1	provisional	silent	c.1170	p.P390	-	NULL	HMMPfam_zf-B_box	-	no_errors	Unknown	Unknown	Unknown	105	0	0	29	36	55.38	Somatic	1	42.0363	0	0	0
3	75062131	75062131	G	C	SNP	Serpini2	NM_026460.2	mouse	genbank	58_37k	-1	validated	intronic	c.479-17	e3-17	-	-	-	-	no_errors	Unknown	Unknown	Unknown	65	0	0	13	18	58.06	Somatic	1	24.5916	0	0	0
3	76465731	76465731	C	A	SNP	Fstl5	NM_178673.3	mouse	genbank	58_37k	1	provisional	missense	c.1768	p.P590T	-	superfamily_Amine_DH_B_like	HMMPfam_Kazal_1,HMMSmart_KAZAL,PatternScan_KAZAL,HMMSmart_IGc2,superfamily_Amine_DH_B_like,HMMPfam_I-set,HMMPfam_ig,PatternScan_EF_HAND_1,HMMPfam_efhand,superfamily_SSF100895,superfamily_SSF47473,superfamily_SSF48726	-	no_errors	Unknown	Unknown	Unknown	56	0	0	20	22	52.38	Somatic	1	22.5608	0	0	0
3	78895585	78895585	C	A	SNP	Rapgef2	ENSMUST00000037943	mouse	ensembl	58_37k	-1	known	intronic	c.1697+149	e11+149	-	-	-	-	no_errors	Unknown	Unknown	Unknown	43	0	0	22	31	58.49	Somatic	1	23.9876	0	1	100
3	79209615	79209615	G	A	SNP	-	-	-	-	-	-	-	-	-	-	-	-	-	-	-	-	-	-	56	0	0	25	35	58.33	Somatic	1	29.7145	0	0	0
3	79417648	79417648	T	A	SNP	Etfdh	NM_025794.2	mouse	genbank	58_37k	-1	validated	nonsense	c.865	p.R289*	-	superfamily_SSF51905	HMMPfam_ETF_QO,HMMPfam_Pyr_redox_2,superfamily_SSF51905	-	no_errors	Unknown	Unknown	Unknown	18	0	0	5	11	64.71	Somatic	0.999986	11.2848	75	0	0
3	82345221	82345221	G	C	SNP	Npy2r	NM_008731.3	mouse	genbank	58_37k	-1	validated	missense	c.181	p.L61V	-	NULL	NULL	-	pseudogene:no_stop_codon:bad_bp_length_for_coding_region	Unknown	Unknown	Unknown	39	0	0	19	24	55.81	Somatic	1	19.6661	0	0	0
3	82833176	82833176	C	A	SNP	Fga	NM_010196.3	mouse	genbank	58_37k	1	validated	missense	c.356	p.A119E	-	HMMPfam_Fib_alpha	HMMPfam_Fib_alpha	-	no_errors	Unknown	Unknown	Unknown	82	0	0	33	27	45	Somatic	1	26.9602	0	0	0
3	84261149	84261149	C	A	SNP	Fhdc1	NM_001033301.3	mouse	genbank	58_37k	-1	validated	silent	c.711	p.S237	-	HMMSmart_FH2,HMMPfam_FH2,superfamily_FH2_actin_bd	HMMSmart_FH2,HMMPfam_FH2,superfamily_FH2_actin_bd	-	no_errors	Unknown	Unknown	Unknown	31	0	0	11	16	59.26	Somatic	1	15.6013	5	1	16.67
3	84323540	84323540	C	A	SNP	Arfip1	NM_001081093.1	mouse	genbank	58_37k	-1	provisional	missense	c.497	p.R166I	-	HMMPfam_Arfaptin	HMMPfam_Arfaptin	-	no_errors	Unknown	Unknown	Unknown	23	0	0	8	9	52.94	Somatic	0.999912	9.34132	94	66	41.25
3	84488524	84488524	C	G	SNP	Tmem154	ENSMUST00000134890	mouse	ensembl	58_37k	1	known	3_prime_untranslated_region	c.*84488524	NULL	-	-	-	-	no_coding_region	Unknown	Unknown	Unknown	186	0	0	127	110	46.41	Somatic	1	76.889	0	0	0
3	85417415	85417415	T	G	SNP	Pet112l	NM_144896.4	mouse	genbank	58_37k	1	provisional	missense	c.908	p.L303R	-	HMMPfam_GatB_N	superfamily_GatB_Yqey,HMMPfam_GatB_N,HMMPfam_GatB,PatternScan_GATB,HMMPfam_GatB_Yqey	-	no_errors	Unknown	Unknown	Unknown	70	0	0	34	18	34.62	Somatic	1	16.802	42	29	40.85
3	86199282	86199282	G	C	SNP	Lrba	NM_030695.2	mouse	genbank	58_37k	1	validated	intronic	c.5651+75	e34+75	-	-	-	-	no_errors	Unknown	Unknown	Unknown	62	0	0	9	9	50	Somatic	1	15.0371	0	0	0
3	86412425	86412425	T	C	SNP	Lrba	NM_030695.2	mouse	genbank	58_37k	1	validated	intronic	c.6557+53	e41+53	-	-	-	-	no_errors	Unknown	Unknown	Unknown	38	0	0	15	16	51.61	Somatic	1	15.5131	0	0	0
3	86802653	86802653	T	A	SNP	Cd1d1	NM_007639.3	mouse	genbank	58_37k	-1	validated	missense	c.236	p.Q79L	-	HMMPfam_MHC_I,superfamily_MHC antigen-recognition domain	HMMPfam_MHC_I,HMMPfam_C1-set,HMMSmart_SM00407,superfamily_MHC antigen-recognition domain,superfamily_Immunoglobulin	-	no_errors	Unknown	Unknown	Unknown	70	0	0	30	23	43.4	Somatic	1	22.2886	6	5	45.45
3	87062774	87062774	C	G	SNP	Fcrls	NM_030707.3	mouse	genbank	58_37k	-1	provisional	intronic	c.601+14	e4+14	-	-	-	-	no_errors	Unknown	Unknown	Unknown	92	0	0	46	24	34.29	Somatic	1	22.0278	0	0	0
3	87549109	87549113	TAGGC	-	DEL	4933430H15Rik	ENSMUST00000023846	mouse	ensembl	58_37k	-1	known	intronic	c.593+32_593+28	e5+32	-	-	-	-	no_errors	Unknown	Unknown	Unknown	NA	NA	NA	NA	NA	NA	Somatic	NA	NA	NA	NA	NA
3	87586160	87586160	C	G	SNP	Ntrk1	ENSMUST00000029712	mouse	ensembl	58_37k	-1	known	missense	c.1423	p.G475R	-	NULL	HMMPfam_Pkinase_Tyr,HMMSmart_TyrKc,HMMPfam_LRR_1,PatternScan_RECEPTOR_TYR_KIN_II,HMMSmart_IG,PatternScan_PROTEIN_KINASE_TYR,superfamily_Kinase_like,PatternScan_PROTEIN_KINASE_ATP,superfamily_SSF48726,superfamily_SSF52058	-	no_errors	Unknown	Unknown	Unknown	44	0	0	18	17	48.57	Somatic	1	16.4513	0	0	0
3	87782234	87782234	C	-	DEL	Nes	NM_016701.3	mouse	genbank	58_37k	1	validated	frame_shift_del	c.3877	p.K1294fs	-	NULL	HMMPfam_Filament,PatternScan_IF	-	no_errors	Unknown	Unknown	Unknown	26	0	0	17	15	46.88	Somatic	0.999979	10.7739	13	5	27.78
3	87782235	87782235	C	A	SNP	Nes	NM_016701.3	mouse	genbank	58_37k	1	validated	missense	c.3878	p.P1293H	-	NULL	HMMPfam_Filament,PatternScan_IF	-	no_errors	Unknown	Unknown	Unknown	26	0	0	15	15	50	Somatic	0.99999	11.4868	13	6	31.58
3	87794151	87794151	C	T	SNP	Bcan	NM_007529.2	mouse	genbank	58_37k	-1	validated	missense	c.2048	p.R683K	-	HMMPfam_Lectin_C,HMMSmart_CLECT,superfamily_C-type_lectin_fold	HMMPfam_Sushi,HMMSmart_CCP,HMMPfam_Xlink,HMMSmart_LINK,PatternScan_LINK_1,HMMPfam_Lectin_C,HMMSmart_CLECT,PatternScan_IG_MHC,HMMSmart_IGv,HMMPfam_EGF,HMMSmart_EGF,PatternScan_EGF_1,PatternScan_EGF_2,HMMPfam_V-set,superfamily_Complement_control_module,supe	-	no_errors	Unknown	Unknown	Unknown	19	0	0	3	12	80	Somatic	0.999999	14.3775	0	0	0
3	87826377	87826377	C	T	SNP	Hapln2	NM_022031.2	mouse	genbank	58_37k	-1	validated	3_prime_untranslated_region	c.*87	NULL	-	-	-	-	no_errors	Unknown	Unknown	Unknown	18	0	0	9	8	47.06	Somatic	0.998968	6.87908	1	0	0
3	88240708	88240708	C	T	SNP	Sema4a	NM_013658.3	mouse	genbank	58_37k	-1	validated	silent	c.2157	p.G719	-	NULL	HMMPfam_Sema,HMMSmart_SM00630,superfamily_Sema domain,HMMPfam_PSI,HMMSmart_SM00423,superfamily_Plexin repeat	-	no_errors	Unknown	Unknown	Unknown	44	0	0	29	26	47.27	Somatic	1	18.5194	1	0	0
3	88241249	88241249	T	C	SNP	Sema4a	NM_013658.3	mouse	genbank	58_37k	-1	validated	intronic	c.1691-75	e14-75	-	-	-	-	no_errors	Unknown	Unknown	Unknown	16	0	0	6	14	70	Somatic	0.999988	11.6789	0	0	0
3	88241253	88241253	A	T	SNP	Sema4a	NM_013658.3	mouse	genbank	58_37k	-1	validated	intronic	c.1691-79	e14-79	-	-	-	-	no_errors	Unknown	Unknown	Unknown	16	0	0	6	13	68.42	Somatic	0.99998	11.0797	0	0	0
3	88253887	88253887	C	A	SNP	Sema4a	ENSMUST00000149145	mouse	ensembl	58_37k	-1	known	5_prime_untranslated_region	c.-88253887	NULL	-	-	-	-	no_coding_region	Unknown	Unknown	Unknown	39	0	0	30	14	30.43	Somatic	0.999942	9.75004	0	0	0
3	88384770	88384770	G	A	SNP	Ssr2	NM_025448.3	mouse	genbank	58_37k	1	provisional	intronic	c.156-126	e2-126	-	-	-	-	no_errors	Unknown	Unknown	Unknown	27	0	0	20	6	23.08	Somatic	0.987886	4.40131	0	2	100
3	88447958	88447958	G	T	SNP	Arhgef2	NM_008487.3	mouse	genbank	58_37k	1	validated	nonsense	c.2503	p.E835*	-	NULL	HMMPfam_RhoGEF,HMMSmart_SM00325,superfamily_DBL homology domain (DH-domain),HMMPfam_PH,HMMSmart_SM00233,HMMPfam_C1_1,HMMSmart_SM00109,PatternScan_ZF_DAG_PE_1,superfamily_PH domain-like,superfamily_Cysteine-rich domain	-	no_errors	Unknown	Unknown	Unknown	12	0	0	7	8	53.33	Somatic	0.997066	5.92327	90	16	15.09
3	88489722	88489722	G	T	SNP	2810403A07Rik	NM_028814.3	mouse	genbank	58_37k	1	validated	5_prime_flanking_region	c.-50	NULL	-	-	-	-	no_errors	Unknown	Unknown	Unknown	21	0	0	12	18	60	Somatic	0.999997	12.7103	0	0	0
3	88497149	88497149	G	T	SNP	2810403A07Rik	NM_028814.3	mouse	genbank	58_37k	1	validated	intronic	c.523+99	e5+99	-	-	-	-	no_errors	Unknown	Unknown	Unknown	64	0	0	34	22	39.29	Somatic	1	19.0055	4	5	55.56
3	88504161	88504161	G	C	SNP	2810403A07Rik	NM_028814.3	mouse	genbank	58_37k	1	validated	intronic	c.1019-22	e10-22	-	-	-	-	no_errors	Unknown	Unknown	Unknown	320	0	0	201	152	42.82	Somatic	1	115.044	4	7	63.64
3	88714394	88714394	C	A	SNP	Msto1	ENSMUST00000147828	mouse	ensembl	58_37k	-1	known	5_prime_untranslated_region	c.-88714394	NULL	-	-	-	-	no_coding_region	Unknown	Unknown	Unknown	72	0	0	26	39	60	Somatic	1	37.3623	0	1	100
3	88787187	88787187	T	A	SNP	Ash1l	NM_138679.5	mouse	genbank	58_37k	1	validated	missense	c.2450	p.L817H	-	NULL	HMMPfam_BAH,HMMSmart_SM00439,HMMPfam_SET,HMMSmart_SM00317,HMMPfam_Bromodomain,HMMSmart_SM00297,superfamily_Bromodomain,HMMSmart_SM00249,HMMSmart_SM00570,superfamily_FYVE/PHD zinc finger,HMMPfam_AT_hook,HMMSmart_SM00384,PatternScan_ZF_PHD_1,HMMPfam_PHD,sup	-	no_errors	Unknown	Unknown	Unknown	73	0	0	32	32	50	Somatic	1	29.3729	67	31	31.63
3	88874640	88874640	A	C	SNP	Ash1l	NM_138679.5	mouse	genbank	58_37k	1	validated	intronic	c.8275+72	e23+72	-	-	-	-	no_errors	Unknown	Unknown	Unknown	14	0	0	11	10	47.62	Somatic	0.998036	6.26646	1	2	66.67
3	88979432	88979432	G	T	SNP	Clk2	ENSMUST00000132830	mouse	ensembl	58_37k	1	known	3_prime_untranslated_region	c.*88979432	NULL	-	-	-	-	no_coding_region	Unknown	Unknown	Unknown	25	0	0	11	7	38.89	Somatic	0.998914	6.82382	3	5	62.5
3	88981361	88981361	G	C	SNP	Thbs3	NM_013691.2	mouse	genbank	58_37k	1	validated	5_prime_flanking_region	c.-37807	NULL	-	-	-	-	no_errors	Unknown	Unknown	Unknown	7	0	0	6	7	53.85	Somatic	0.97259	3.90617	0	0	0
3	88984189	88984189	G	A	SNP	Scamp3	NM_011886.2	mouse	genbank	58_37k	1	validated	nonsense	c.410	p.W137*	-	HMMPfam_SCAMP	HMMPfam_SCAMP	-	no_errors	Unknown	Unknown	Unknown	273	0	0	181	127	41.1	Somatic	1	93.6175	138	10	6.76
3	89022633	89022633	G	A	SNP	Thbs3	NM_013691.2	mouse	genbank	58_37k	1	validated	intronic	c.647-146	e5-146	-	-	-	-	no_errors	Unknown	Unknown	Unknown	63	0	0	24	38	61.29	Somatic	1	34.763	0	0	0
3	89028915	89028915	G	C	SNP	Thbs3	NM_013691.2	mouse	genbank	58_37k	1	validated	missense	c.2486	p.G829A	-	HMMPfam_TSP_C,superfamily_ConA_like_lec_gl	HMMSmart_EGF_CA,HMMSmart_TSPN,HMMPfam_TSP_3,HMMSmart_EGF,HMMPfam_TSP_C,superfamily_ConA_like_lec_gl,PatternScan_EGF_2,HMMPfam_EGF_CA,PatternScan_EGF_CA,superfamily_SSF103647,superfamily_SSF57196	-	no_errors	Unknown	Unknown	Unknown	41	0	0	18	20	52.63	Somatic	1	17.998	1	3	75
3	89080276	89080276	T	A	SNP	Efna1	NM_010107.4	mouse	genbank	58_37k	-1	validated	missense	c.164	p.E55V	-	HMMPfam_Ephrin,superfamily_Cupredoxin	HMMPfam_Ephrin,superfamily_Cupredoxin,PatternScan_EPHRIN	-	no_errors	Unknown	Unknown	Unknown	16	0	0	11	9	45	Somatic	0.998188	6.32048	8	4	33.33
3	89228763	89228763	G	T	SNP	Shc1	NM_011368.5	mouse	genbank	58_37k	1	validated	missense	c.602	p.R201L	-	HMMPfam_PID,HMMSmart_PTB,superfamily_SSF50729	HMMPfam_SH2,HMMSmart_SH2,HMMPfam_PID,HMMSmart_PTB,superfamily_SSF50729,superfamily_SSF55550	-	no_errors	Unknown	Unknown	Unknown	52	0	0	27	27	50	Somatic	1	22.198	385	347	47.34
3	89252666	89252666	C	A	SNP	Pbxip1	NM_146131.2	mouse	genbank	58_37k	1	validated	missense	c.2162	p.P721Q	-	NULL	NULL	-	no_errors	Unknown	Unknown	Unknown	64	0	0	38	32	45.71	Somatic	1	24.7537	34	29	45.31
3	90205335	90205335	C	A	SNP	Ints3	NM_145540.2	mouse	genbank	58_37k	-1	validated	missense	c.1810	p.V604F	-	NULL	HMMPfam_DUF2356	-	no_errors	Unknown	Unknown	Unknown	221	0	0	111	94	45.85	Somatic	1	81.206	120	108	47.37
3	90219595	90219595	C	G	SNP	Ints3	NM_145540.2	mouse	genbank	58_37k	-1	validated	intronic	c.316-67	e4-67	-	-	-	-	no_errors	Unknown	Unknown	Unknown	26	0	0	15	16	51.61	Somatic	0.999994	12.1033	0	0	0
3	92288532	92288532	G	T	SNP	Sprr1a	NM_009264.2	mouse	genbank	58_37k	-1	provisional	missense	c.83	p.P28Q	-	HMMPfam_Cornifin	HMMPfam_Cornifin	-	no_errors	Unknown	Unknown	Unknown	61	0	0	22	31	58.49	Somatic	1	30.1272	1	2	66.67
3	92392846	92392846	C	G	SNP	Smcp	NM_008574.3	mouse	genbank	58_37k	-1	validated	missense	c.47	p.C16S	-	NULL	PatternScan_VWFC_1	-	pseudogene	Unknown	Unknown	Unknown	68	0	0	18	18	50	Somatic	1	22.2794	0	0	0
3	93024477	93024477	C	A	SNP	Flg2	NM_001013804.1	mouse	genbank	58_37k	1	provisional	missense	c.6767	p.T2256N	-	NULL	PatternScan_S100_CABP,HMMPfam_S_100,PatternScan_EF_HAND_1,HMMPfam_efhand,superfamily_EF-hand	-	no_errors	Unknown	Unknown	Unknown	51	0	0	19	10	34.48	Somatic	0.999982	10.9477	0	0	0
3	93083214	93083214	G	T	SNP	Flg	ENSMUST00000148311	mouse	ensembl	58_37k	1	known	intronic	c.139-89	e2-89	-	-	-	-	no_stop_codon	Unknown	Unknown	Unknown	36	0	0	15	12	44.44	Somatic	0.999992	11.7657	0	0	0
3	93124525	93124525	C	A	SNP	Hrnr	ENSMUST00000093774	mouse	ensembl	58_37k	1	known	silent	c.27	p.V9	-	HMMPfam_S_100,superfamily_EF-hand	PatternScan_S100_CABP,HMMPfam_S_100,PatternScan_EF_HAND_1,superfamily_EF-hand	-	no_errors	Unknown	Unknown	Unknown	112	0	0	35	30	46.15	Somatic	1	34.5613	0	0	0
3	93252991	93252991	G	C	SNP	Tchh	ENSMUST00000064257	mouse	ensembl	58_37k	1	known	3_prime_untranslated_region	c.*1015	NULL	-	-	-	-	no_errors	Unknown	Unknown	Unknown	343	0	0	98	106	51.96	Somatic	1	124.248	0	0	0
3	93456414	93456414	T	C	SNP	Tdpoz2	NM_001007222.2	mouse	genbank	58_37k	-1	validated	missense	c.172	p.R58G	-	HMMPfam_MATH,HMMSmart_SM00061,superfamily_TRAF domain-like	HMMSmart_SM00225,HMMPfam_MATH,HMMSmart_SM00061,superfamily_TRAF domain-like,superfamily_POZ domain,HMMPfam_BTB	-	no_errors	Unknown	Unknown	Unknown	415	0	0	380	10	2.56	Somatic	0.927875	3.14301	0	0	0
3	93531180	93531180	C	G	SNP	ENSMUSG00000064290	ENSMUST00000075105	mouse	ensembl	58_37k	-1	known	silent	c.789	p.L263	-	HMMSmart_SM00225,superfamily_POZ domain,HMMPfam_BTB	HMMSmart_SM00225,PatternScan_N6_MTASE,HMMPfam_MATH,HMMSmart_SM00061,superfamily_TRAF domain-like,superfamily_POZ domain,HMMPfam_BTB	-	no_errors	Unknown	Unknown	Unknown	25	0	0	14	4	22.22	Somatic	0.971181	3.52155	0	0	0
3	93577586	93577586	A	T	SNP	Tdpoz2	ENSMUST00000090853	mouse	ensembl	58_37k	1	known	missense	c.642	p.R214S	-	HMMSmart_SM00225,superfamily_POZ domain,HMMPfam_BTB	HMMSmart_SM00225,HMMPfam_MATH,HMMSmart_SM00061,superfamily_TRAF domain-like,superfamily_POZ domain,HMMPfam_BTB	-	no_errors	Unknown	Unknown	Unknown	237	0	0	164	40	19.61	Somatic	1	30.7899	0	0	0
3	93600592	93600592	G	T	SNP	Tdpoz4	NM_207272.2	mouse	genbank	58_37k	1	provisional	missense	c.273	p.E91D	-	HMMPfam_MATH,superfamily_TRAF domain-like	HMMSmart_SM00225,HMMPfam_MATH,superfamily_TRAF domain-like,superfamily_POZ domain,HMMPfam_BTB	-	no_errors	Unknown	Unknown	Unknown	436	0	0	288	40	12.2	Somatic	1	30.919	0	0	0
3	94247228	94247228	C	A	SNP	Celf3	NM_172434.2	mouse	genbank	58_37k	1	provisional	5_prime_flanking_region	c.-35801	NULL	-	-	-	-	no_errors	Unknown	Unknown	Unknown	24	0	0	19	9	32.14	Somatic	0.997838	6.13447	1	0	0
3	94291261	94291261	C	A	SNP	Celf3	NM_172434.2	mouse	genbank	58_37k	1	provisional	intronic	c.919+55	e8+55	-	-	-	-	no_errors	Unknown	Unknown	Unknown	42	0	0	18	24	57.14	Somatic	1	21.1504	0	1	100
3	94574492	94574492	G	T	SNP	Cgn	XM_001001375.2	mouse	genbank	58_37k	-1	model	silent	c.2383	p.R795	-	NULL	HMMPfam_Myosin_tail_1	-	no_errors	Unknown	Unknown	Unknown	26	0	0	17	13	43.33	Somatic	0.999929	9.55549	0	0	0
3	94574574	94574574	C	A	SNP	Cgn	XM_001001375.2	mouse	genbank	58_37k	-1	model	missense	c.2301	p.Q767H	-	NULL	HMMPfam_Myosin_tail_1	-	no_errors	Unknown	Unknown	Unknown	12	0	0	8	4	33.33	Somatic	0.95484	3.05469	0	0	0
3	94580056	94580056	C	A	SNP	Cgn	XM_001001375.2	mouse	genbank	58_37k	-1	model	missense	c.1597	p.G533W	-	NULL	HMMPfam_Myosin_tail_1	-	no_errors	Unknown	Unknown	Unknown	250	0	0	129	129	50	Somatic	1	106.498	0	0	0
3	94683280	94683280	G	T	SNP	Pogz	NM_172683.3	mouse	genbank	58_37k	1	validated	missense	c.3256	p.A1086S	-	NULL	HMMPfam_DDE,HMMSmart_SM00674,HMMPfam_zf-C2H2,PatternScan_ZINC_FINGER_C2H2_1,superfamily_Homeodomain-like,HMMPfam_CenpB-DNA-bind,HMMSmart_SM00355,superfamily_C2H2 and C2HC zinc fingers	-	no_errors	Unknown	Unknown	Unknown	79	0	0	27	36	57.14	Somatic	1	36.579	30	26	46.43
3	94748253	94748253	C	T	SNP	Selenbp1	NM_009150.3	mouse	genbank	58_37k	1	provisional	intronic	c.1257-75	e12-75	-	-	-	-	no_errors	Unknown	Unknown	Unknown	17	0	0	9	6	40	Somatic	0.994377	5.17645	0	0	0
3	95152121	95152121	A	C	SNP	Setdb1	NM_018877.3	mouse	genbank	58_37k	-1	validated	intronic	c.448-104	e4-104	-	-	-	-	no_errors	Unknown	Unknown	Unknown	51	0	0	36	7	15.91	Somatic	0.995023	5.29821	2	0	0
3	95578235	95578235	T	C	SNP	Rprd2	NM_001081293.1	mouse	genbank	58_37k	-1	provisional	missense	c.1268	p.K423R	-	NULL	HMMSmart_SM00582,HMMPfam_DUF618,superfamily_ENTH/VHS domain	-	no_errors	Unknown	Unknown	Unknown	60	0	0	31	28	47.46	Somatic	1	23.5034	43	52	53.61
3	95639557	95639557	C	A	SNP	Prpf3	NM_027541.4	mouse	genbank	58_37k	-1	provisional	splice_region	c.1526+10	e10+10	-	-	-	-	no_errors	Unknown	Unknown	Unknown	137	0	0	83	69	45.39	Somatic	1	52.7563	0	0	0
3	95996296	95996296	C	A	SNP	Sv2a	NM_022030.3	mouse	genbank	58_37k	1	provisional	intronic	c.1679-41	e10-41	-	-	-	-	no_errors	Unknown	Unknown	Unknown	28	0	0	11	16	59.26	Somatic	1	14.6323	0	0	0
3	96244762	96244762	G	T	SNP	BC107364	ENSMUST00000093126	mouse	ensembl	58_37k	-1	known	missense	c.133	p.Q45K	-	NULL	NULL	-	no_errors	Unknown	Unknown	Unknown	55	0	0	25	26	50.98	Somatic	1	23.1584	0	0	0
3	96412612	96412612	G	T	SNP	6330549D23Rik	ENSMUST00000059190	mouse	ensembl	58_37k	-1	known	5_prime_untranslated_region	c.-506	NULL	-	-	-	-	no_errors	Unknown	Unknown	Unknown	40	0	0	27	24	47.06	Somatic	1	16.8363	2	2	50
3	96458629	96458629	C	A	SNP	Itga10	NM_001081053.1	mouse	genbank	58_37k	1	provisional	intronic	c.1923-15	e16-15	-	-	-	-	no_errors	Unknown	Unknown	Unknown	62	0	0	28	22	44	Somatic	1	20.5665	0	0	0
3	96474283	96474283	G	T	SNP	Ankrd35	NM_001081139.1	mouse	genbank	58_37k	1	provisional	5_prime_untranslated_region	c.-51	NULL	-	-	-	-	no_errors	Unknown	Unknown	Unknown	152	0	0	81	80	49.69	Somatic	1	64.7863	0	0	0
3	96507486	96507486	G	A	SNP	Pias3	NM_146135.2	mouse	genbank	58_37k	1	validated	missense	c.1156	p.D386N	-	superfamily_SSF57850	HMMPfam_SAP,HMMSmart_SAP,HMMPfam_zf-MIZ,superfamily_SSF57850	-	no_errors	Unknown	Unknown	Unknown	70	0	0	38	40	51.28	Somatic	1	31.6187	32	29	47.54
3	96508834	96508834	G	T	SNP	Pias3	NM_146135.2	mouse	genbank	58_37k	1	validated	missense	c.1656	p.Q552H	-	NULL	HMMPfam_SAP,HMMSmart_SAP,HMMPfam_zf-MIZ,superfamily_SSF57850	-	no_errors	Unknown	Unknown	Unknown	139	0	0	64	63	49.61	Somatic	1	56.189	46	44	48.89
3	96697497	96697497	C	A	SNP	Gpr89	NM_026229.4	mouse	genbank	58_37k	-1	provisional	silent	c.237	p.L79	-	NULL	NULL	-	no_errors	Unknown	Unknown	Unknown	26	0	0	4	6	60	Somatic	0.999902	9.22878	107	93	46.5
3	96979689	96979689	G	A	SNP	Acp6	NM_019800.4	mouse	genbank	58_37k	1	validated	nonsense	c.1092	p.W364*	-	HMMPfam_Acid_phosphat_A,superfamily_Phosphoglycerate mutase-like	HMMPfam_Acid_phosphat_A,PatternScan_HIS_ACID_PHOSPHAT_1,superfamily_Phosphoglycerate mutase-like	-	no_errors	Unknown	Unknown	Unknown	98	0	0	50	46	47.92	Somatic	1	38.8159	69	45	39.47
3	97505608	97505608	G	T	SNP	Pde4dip	ENSMUST00000090750	mouse	ensembl	58_37k	-1	known	splice_region	c.5798-8	e37-8	-	-	-	-	no_errors	Unknown	Unknown	Unknown	108	0	0	57	48	45.71	Somatic	1	40.1769	0	0	0
3	97513405	97513405	C	A	SNP	Pde4dip	ENSMUST00000090750	mouse	ensembl	58_37k	-1	known	missense	c.5227	p.G1743C	-	NULL	HMMPfam_Microtub_assoc	-	no_errors	Unknown	Unknown	Unknown	145	0	0	63	50	44.25	Somatic	1	47.821	0	0	0
3	97950232	97950232	A	C	SNP	Notch2	NM_010928.2	mouse	genbank	58_37k	1	validated	missense	c.6287	p.K2096T	-	superfamily_Ankyrin repeat	PatternScan_ASX_HYDROXYL,HMMPfam_Notch,HMMSmart_SM00004,superfamily_Notch domain,HMMSmart_SM00179,HMMPfam_Ank,HMMSmart_SM00248,superfamily_Ankyrin repeat,HMMPfam_EGF,HMMSmart_SM00181,HMMPfam_NOD,HMMPfam_NODP,PatternScan_EGF_1,PatternScan_EGF_2,HMMPfam_EGF	-	no_errors	Unknown	Unknown	Unknown	117	0	0	73	8	9.88	Somatic	0.998003	6.21957	130	16	10.96
3	97965221	97965221	G	T	SNP	Adam30	NM_027665.1	mouse	genbank	58_37k	1	provisional	missense	c.446	p.R149M	-	HMMPfam_Pep_M12B_propep	HMMPfam_Reprolysin,HMMPfam_Disintegrin,HMMSmart_DISIN,superfamily_Disintegrin,HMMPfam_Pep_M12B_propep,HMMPfam_ADAM_CR,HMMSmart_ACR,PatternScan_EGF_2,HMMPfam_EGF_2,PatternScan_DISINTEGRIN_1,superfamily_SSF55486	-	no_errors	Unknown	Unknown	Unknown	76	0	0	44	39	46.99	Somatic	1	30.4335	0	0	0
3	98101477	98101477	T	A	SNP	Hmgcs2	NM_008256.4	mouse	genbank	58_37k	1	validated	intronic	c.1016+11	e5+11	-	-	-	-	no_errors	Unknown	Unknown	Unknown	63	0	0	37	32	46.38	Somatic	1	24.8303	0	0	0
3	99884070	99884070	G	T	SNP	Spag17	NM_028892.4	mouse	genbank	58_37k	1	validated	silent	c.4317	p.L1439	-	NULL	NULL	-	no_errors	Unknown	Unknown	Unknown	176	0	0	71	70	49.65	Somatic	1	67.8592	0	0	0
3	99907273	99907273	C	A	SNP	Spag17	NM_028892.4	mouse	genbank	58_37k	1	validated	silent	c.5724	p.I1908	-	NULL	NULL	-	no_errors	Unknown	Unknown	Unknown	60	0	0	21	12	36.36	Somatic	0.999999	13.5286	0	0	0
3	99973877	99973877	G	T	SNP	Gdap2	NM_010269.2	mouse	genbank	58_37k	1	provisional	5_prime_untranslated_region	c.-46	NULL	-	-	-	-	no_errors	Unknown	Unknown	Unknown	16	0	0	10	7	41.18	Somatic	0.995375	5.37466	20	13	39.39
3	100753919	100753919	C	G	SNP	Ttf2	NM_001013026.2	mouse	genbank	58_37k	-1	validated	intronic	c.2425-70	e15-70	-	-	-	-	no_errors	Unknown	Unknown	Unknown	44	0	0	9	23	69.7	Somatic	1	27.1395	0	1	100
3	101969315	101969315	C	T	SNP	Vangl1	NM_177545.4	mouse	genbank	58_37k	-1	validated	missense	c.1048	p.A350T	-	HMMPfam_Strabismus	HMMPfam_Strabismus	-	no_errors	Unknown	Unknown	Unknown	94	1	1.05	48	36	42.86	Somatic	1	28.2965	112	121	51.71
3	101988125	101988125	C	G	SNP	Vangl1	NM_177545.4	mouse	genbank	58_37k	-1	validated	silent	c.567	p.A189	-	HMMPfam_Strabismus	HMMPfam_Strabismus	-	no_errors	Unknown	Unknown	Unknown	48	0	0	17	8	32	Somatic	0.999886	9.07868	113	135	54.44
3	102317949	102317949	G	T	SNP	Ngf	NM_013609.2	mouse	genbank	58_37k	1	validated	missense	c.133	p.G45W	-	NULL	HMMPfam_NGF,HMMSmart_NGF,PatternScan_NGF_1,superfamily_SSF57501	-	no_errors	Unknown	Unknown	Unknown	63	0	0	20	27	57.45	Somatic	1	28.6136	228	185	44.69
3	102879436	102879436	G	T	SNP	Ampd1	NM_001033303.2	mouse	genbank	58_37k	1	validated	intronic	c.34+95	e2+95	-	-	-	-	no_errors	Unknown	Unknown	Unknown	41	0	0	9	11	55	Somatic	1	14.6105	0	0	0
3	102961667	102961667	G	A	SNP	Dennd2c	NM_177857.1	mouse	genbank	58_37k	1	validated	missense	c.2164	p.V722M	-	HMMPfam_DENN,HMMSmart_SM00799	HMMPfam_DENN,HMMSmart_SM00799,HMMPfam_dDENN,HMMSmart_SM00801,HMMPfam_uDENN,HMMSmart_SM00800	-	no_errors	Unknown	Unknown	Unknown	55	0	0	33	28	45.9	Somatic	1	21.4795	18	16	47.06
3	103557323	103557323	C	-	DEL	Hipk1	NM_010432.2	mouse	genbank	58_37k	-1	validated	frame_shift_del	c.2218	p.E740fs	-	NULL	HMMSmart_SM00219,HMMSmart_SM00220,PatternScan_PROTEIN_KINASE_ST,superfamily_Protein kinase-like (PK-like),PatternScan_PROTEIN_KINASE_ATP,HMMPfam_Pkinase	-	no_errors	Unknown	Unknown	Unknown	32	0	0	12	10	45.45	Somatic	0.999969	10.3951	128	31	19.5
3	103797679	103797679	G	T	SNP	Phtf1	NM_013629.2	mouse	genbank	58_37k	1	validated	missense	c.1120	p.D374Y	-	NULL	NULL	-	no_errors	Unknown	Unknown	Unknown	43	0	0	27	26	49.06	Somatic	1	18.9127	101	85	45.7
3	104268008	104268008	C	A	SNP	Lrig2	NM_001025067.1	mouse	genbank	58_37k	-1	validated	missense	c.2301	p.M767I	-	HMMSmart_SM00408,HMMSmart_SM00409,HMMPfam_I-set,superfamily_Immunoglobulin	HMMPfam_LRRCT,HMMSmart_SM00082,HMMPfam_LRR_1,HMMSmart_SM00369,HMMSmart_SM00408,HMMSmart_SM00409,HMMPfam_I-set,HMMPfam_V-set,HMMSmart_SM00365,superfamily_Immunoglobulin,superfamily_RNI-like	-	no_errors	Unknown	Unknown	Unknown	55	0	0	20	36	64.29	Somatic	1	32.8884	32	23	41.82
3	104604116	104604116	C	A	SNP	Mov10	NM_008619.2	mouse	genbank	58_37k	-1	validated	intronic	c.1299-65	e8-65	-	-	-	-	no_errors	Unknown	Unknown	Unknown	30	0	0	7	11	61.11	Somatic	0.999999	13.5069	0	0	0
3	105820738	105820738	G	T	SNP	Bclp2	NM_001080816.1	mouse	genbank	58_37k	-1	provisional	intronic	c.1177+147	e10+147	-	-	-	-	no_errors	Unknown	Unknown	Unknown	11	0	0	5	4	44.44	Somatic	0.975724	3.71484	0	0	0
3	105835744	105835744	G	T	SNP	Bclp2	NM_001080816.1	mouse	genbank	58_37k	-1	provisional	5_prime_flanking_region	c.-12	NULL	-	-	-	-	no_errors	Unknown	Unknown	Unknown	159	0	0	77	60	43.8	Somatic	1	53.7197	0	0	0
3	105958554	105958554	C	A	SNP	Chi3l3	NM_009892.2	mouse	genbank	58_37k	-1	validated	intronic	c.605+32	e6+32	-	-	-	-	no_errors	Unknown	Unknown	Unknown	100	0	0	28	32	53.33	Somatic	1	37.604	0	0	0
3	106017767	106017767	C	T	SNP	Chi3l4	NM_145126.2	mouse	genbank	58_37k	-1	validated	intronic	c.55+141	e2+141	-	-	-	-	no_errors	Unknown	Unknown	Unknown	30	0	0	8	12	60	Somatic	0.999999	13.7923	0	0	0
3	106191924	106191924	C	G	SNP	BC051070	NM_178412.2	mouse	genbank	58_37k	-1	predicted	missense	c.999	p.Q333H	-	HMMPfam_Glyco_hydro_18,HMMSmart_Glyco_18,superfamily_Glyco_hydro_cat,superfamily_SSF54556	HMMPfam_Glyco_hydro_18,HMMSmart_Glyco_18,superfamily_Glyco_hydro_cat,superfamily_SSF54556	-	no_errors	Unknown	Unknown	Unknown	41	0	0	20	17	45.95	Somatic	1	14.9586	0	0	0
3	106193921	106193922	-	A	INS	BC051070	NM_178412.2	mouse	genbank	58_37k	-1	predicted	intronic	c.656+56_656+55	e6+56	-	-	-	-	no_errors	Unknown	Unknown	Unknown	42	0	0	30	5	14.29	Somatic	0.976441	3.72968	0	0	0
3	107022746	107022746	C	A	SNP	Cym	ENSMUST00000029504	mouse	ensembl	58_37k	-1	known	intronic	c.63-53	e2-53	-	-	-	-	no_errors	Unknown	Unknown	Unknown	48	0	0	12	12	50	Somatic	1	15.3225	0	0	0
3	107095490	107095490	A	G	SNP	Slc16a4	NM_146136.1	mouse	genbank	58_37k	1	provisional	intronic	c.87+47	e1+47	-	-	-	-	no_errors	Unknown	Unknown	Unknown	49	0	0	22	23	51.11	Somatic	1	20.6301	0	1	100
3	107277295	107277295	A	G	SNP	Slc6a17	NM_172271.2	mouse	genbank	58_37k	-1	provisional	missense	c.1378	p.F460L	-	HMMPfam_SNF	HMMPfam_SNF,PatternScan_NA_NEUROTRAN_SYMP_1,PatternScan_NA_NEUROTRAN_SYMP_2	-	no_errors	Unknown	Unknown	Unknown	38	0	0	17	21	55.26	Somatic	1	18.2868	0	0	0
3	107398269	107398269	C	A	SNP	Alx3	NM_007441.2	mouse	genbank	58_37k	1	provisional	missense	c.176	p.P59H	-	NULL	HMMPfam_Homeobox,HMMSmart_SM00389,superfamily_Homeodomain-like,PatternScan_HOMEOBOX_1	-	no_errors	Unknown	Unknown	Unknown	9	0	0	4	5	55.56	Somatic	0.985441	4.36205	0	0	0
3	107431030	107431030	C	G	SNP	Fam40a	NM_153563.2	mouse	genbank	58_37k	-1	validated	intronic	c.1+44	e0+44	-	-	-	-	no_errors	Unknown	Unknown	Unknown	60	0	0	17	14	45.16	Somatic	1	17.1232	0	4	100
3	107882927	107882927	C	A	SNP	Ampd2	ENSMUST00000153626	mouse	ensembl	58_37k	-1	known	5_prime_untranslated_region	c.-107882927	NULL	-	-	-	-	no_coding_region	Unknown	Unknown	Unknown	68	0	0	46	31	40.26	Somatic	1	22.6608	2	2	50
3	108003466	108003466	A	T	SNP	Cyb561d1	ENSMUST00000106654	mouse	ensembl	58_37k	-1	known	5_prime_untranslated_region	c.-412	NULL	-	-	-	-	no_errors	Unknown	Unknown	Unknown	22	0	0	15	13	46.43	Somatic	0.999888	9.09511	0	0	0
3	108130842	108130842	G	C	SNP	Sort1	NM_019972.2	mouse	genbank	58_37k	1	provisional	intronic	c.703-84	e6-84	-	-	-	-	no_errors	Unknown	Unknown	Unknown	22	0	0	9	5	35.71	Somatic	0.994291	5.16019	0	0	0
3	108178371	108178371	G	A	SNP	Mybphl	NM_026831.1	mouse	genbank	58_37k	1	provisional	missense	c.658	p.V220I	-	HMMPfam_fn3,HMMSmart_FN3,superfamily_FN_III-like	HMMSmart_IG,HMMPfam_fn3,HMMSmart_FN3,superfamily_FN_III-like,HMMPfam_I-set,superfamily_SSF48726	-	no_errors	Unknown	Unknown	Unknown	42	0	0	20	15	42.86	Somatic	0.999999	13.646	0	0	0
3	108187108	108187108	C	A	SNP	Psrc1	ENSMUST00000128089	mouse	ensembl	58_37k	1	known	5_prime_untranslated_region	c.-32	NULL	-	-	-	-	no_stop_codon:bad_bp_length_for_coding_region	Unknown	Unknown	Unknown	48	0	0	34	26	43.33	Somatic	1	18.0724	0	0	0
3	108339363	108339363	C	A	SNP	5330417C22Rik	ENSMUST00000106625	mouse	ensembl	58_37k	-1	known	missense	c.4	p.A2S	-	NULL	superfamily_Mannose 6-phosphate receptor domain,superfamily_Growth factor receptor domain	-	no_errors	Unknown	Unknown	Unknown	93	0	0	42	49	53.85	Somatic	1	42.8953	0	0	0
3	108584188	108584188	C	A	SNP	Aknad1	ENSMUST00000062935	mouse	ensembl	58_37k	1	known	intronic	c.774+20	e8+20	-	-	-	-	no_errors	Unknown	Unknown	Unknown	31	0	0	7	9	56.25	Somatic	0.999992	11.6771	0	0	0
3	108675144	108675144	A	G	SNP	Fndc7	NM_177091.5	mouse	genbank	58_37k	-1	validated	missense	c.1001	p.L334P	-	superfamily_Fibronectin type III	HMMPfam_fn3,HMMSmart_SM00060,superfamily_Fibronectin type III	-	no_errors	Unknown	Unknown	Unknown	39	0	0	15	23	60.53	Somatic	1	21.0684	0	0	0
3	108675145	108675145	G	T	SNP	Fndc7	NM_177091.5	mouse	genbank	58_37k	-1	validated	missense	c.1000	p.L334I	-	superfamily_Fibronectin type III	HMMPfam_fn3,HMMSmart_SM00060,superfamily_Fibronectin type III	-	no_errors	Unknown	Unknown	Unknown	40	0	0	15	23	60.53	Somatic	1	21.4104	0	0	0
3	108901507	108901507	G	T	SNP	4930443G12Rik	ENSMUST00000029478	mouse	ensembl	58_37k	1	known	missense	c.412	p.G138W	-	HMMSmart_EFh,superfamily_SSF47473	superfamily_Mitoch_carrier,HMMSmart_EFh,HMMPfam_Mito_carr,PatternScan_EF_HAND_1,HMMPfam_efhand,superfamily_SSF47473	-	no_errors	Unknown	Unknown	Unknown	195	0	0	78	66	45.83	Somatic	1	65.8386	0	0	0
3	113802816	113802816	G	T	SNP	Col11a1	NM_007729.2	mouse	genbank	58_37k	1	validated	intronic	c.1407+45	e11+45	-	-	-	-	no_errors	Unknown	Unknown	Unknown	55	0	0	18	17	48.57	Somatic	1	18.8161	0	0	0
3	113814996	113814996	C	A	SNP	Col11a1	NM_007729.2	mouse	genbank	58_37k	1	validated	missense	c.1721	p.P574H	-	HMMPfam_Collagen	HMMPfam_COLFI,HMMSmart_COLFI,HMMSmart_LamG,HMMSmart_TSPN,HMMPfam_Collagen,superfamily_ConA_like_lec_gl,HMMPfam_Laminin_G_2	-	no_errors	Unknown	Unknown	Unknown	56	0	0	25	15	37.5	Somatic	1	14.5809	2	0	0
3	115710038	115710038	C	T	SNP	Slc30a7	NM_023214.7	mouse	genbank	58_37k	-1	validated	intronic	c.80+15	e1+15	-	-	-	-	no_errors	Unknown	Unknown	Unknown	182	0	0	100	70	41.18	Somatic	1	58.5825	1	0	0
3	116308139	116308139	G	T	SNP	Sass6	NM_028349.2	mouse	genbank	58_37k	1	validated	missense	c.151	p.D51Y	-	NULL	NULL	-	no_errors	Unknown	Unknown	Unknown	68	0	0	21	20	48.78	Somatic	1	22.8634	37	17	31.48
3	116673144	116673144	A	T	SNP	ENSMUSG00000080907	ENSMUST00000117592	mouse	ensembl	58_37k	1	known	missense	c.122	p.Q41L	-	NULL	NULL	-	no_errors	Unknown	Unknown	Unknown	101	0	0	30	33	52.38	Somatic	1	37.7306	0	0	0
3	119129976	119129976	A	T	SNP	Dpyd	NM_170778.2	mouse	genbank	58_37k	1	provisional	intronic	c.2767-90	e22-90	-	-	-	-	no_errors	Unknown	Unknown	Unknown	44	0	0	12	10	45.45	Somatic	0.999996	12.4712	0	0	0
3	120938102	120938102	G	T	SNP	Tmem56	NM_178936.3	mouse	genbank	58_37k	-1	provisional	missense	c.53	p.T18N	-	NULL	HMMPfam_TRAM_LAG1_CLN8,HMMSmart_SM00724	-	no_errors	Unknown	Unknown	Unknown	29	0	0	17	14	45.16	Somatic	0.999983	10.9627	0	0	0
3	121747446	121747446	G	T	SNP	Abca4	NM_007378.1	mouse	genbank	58_37k	1	reviewed	5_prime_untranslated_region	c.-19	NULL	-	-	-	-	no_errors	Unknown	Unknown	Unknown	24	0	0	5	6	54.55	Somatic	0.999729	8.21474	0	0	0
3	121832146	121832146	C	T	SNP	Abca4	NM_007378.1	mouse	genbank	58_37k	1	reviewed	intronic	c.3523-88	e24-88	-	-	-	-	no_errors	Unknown	Unknown	Unknown	20	0	0	11	18	62.07	Somatic	0.999997	12.7699	1	0	0
3	121981644	121981644	A	G	SNP	Dnttip2	NM_153806.1	mouse	genbank	58_37k	1	provisional	intronic	c.1674-20	e3-20	-	-	-	-	no_errors	Unknown	Unknown	Unknown	32	0	0	10	8	44.44	Somatic	0.999908	9.29657	0	0	0
3	122481755	122481755	G	T	SNP	Pde5a	NM_153422.2	mouse	genbank	58_37k	1	validated	intronic	c.964-98	e6-98	-	-	-	-	no_errors	Unknown	Unknown	Unknown	25	0	0	17	13	43.33	Somatic	0.999908	9.29865	0	0	0
3	123086438	123086438	C	A	SNP	Mettl14	NM_201638.2	mouse	genbank	58_37k	-1	validated	intronic	c.155+76	e2+76	-	-	-	-	no_errors	Unknown	Unknown	Unknown	149	0	0	56	60	51.72	Somatic	1	59.9171	0	1	100
3	123189972	123189972	G	C	SNP	Prss12	NM_008939.2	mouse	genbank	58_37k	1	validated	missense	c.1387	p.A463P	-	HMMPfam_SRCR,HMMSmart_SR,superfamily_Srcr_receptor	HMMPfam_Kringle,HMMSmart_KR,HMMPfam_SRCR,PatternScan_SRCR_1,HMMPfam_Trypsin,HMMSmart_Tryp_SPc,superfamily_Pept_Ser_Cys,superfamily_Kringle-like,HMMSmart_SR,superfamily_Srcr_receptor,PatternScan_KRINGLE_1,PatternScan_TRYPSIN_HIS,PatternScan_TRYPSIN_SER	-	no_errors	Unknown	Unknown	Unknown	39	0	0	13	15	53.57	Somatic	1	15.9004	0	5	100
3	123259868	123259868	G	T	SNP	Ndst3	NM_031186.2	mouse	genbank	58_37k	-1	provisional	intronic	c.1820-35	e8-35	-	-	-	-	no_errors	Unknown	Unknown	Unknown	16	0	0	13	7	35	Somatic	0.990275	4.62399	0	0	0
3	125618139	125618139	G	A	SNP	Ugt8a	NM_011674.4	mouse	genbank	58_37k	-1	provisional	missense	c.239	p.T80I	-	HMMPfam_UDPGT,superfamily_SSF53756	HMMPfam_UDPGT,PatternScan_UDPGT,superfamily_SSF53756	-	no_errors	Unknown	Unknown	Unknown	104	0	0	37	42	53.16	Somatic	1	42.9332	4	0	0
3	128921335	128921335	G	T	SNP	Pitx2	NM_001042502.1	mouse	genbank	58_37k	1	validated	silent	c.495	p.P165	-	NULL	HMMPfam_Homeobox,HMMSmart_SM00389,HMMPfam_OAR,superfamily_Homeodomain-like,PatternScan_HOMEOBOX_1	-	no_errors	Unknown	Unknown	Unknown	73	0	0	27	29	51.79	Somatic	1	29.233	0	0	0
3	130406352	130406352	C	A	SNP	Ostc	NM_025509.3	mouse	genbank	58_37k	-1	validated	missense	c.313	p.D105Y	-	HMMPfam_DUF2055	HMMPfam_DUF2055	-	no_errors	Unknown	Unknown	Unknown	65	0	0	22	24	52.17	Somatic	1	25.456	527	488	48.03
3	130893866	130893866	C	A	SNP	Lef1	NM_010703.3	mouse	genbank	58_37k	1	provisional	intronic	c.633-75	e6-75	-	-	-	-	no_errors	Unknown	Unknown	Unknown	30	0	0	18	11	37.93	Somatic	0.999854	8.83066	0	0	0
3	130896167	130896167	C	A	SNP	Lef1	NM_010703.3	mouse	genbank	58_37k	1	provisional	missense	c.837	p.H279Q	-	NULL	HMMPfam_HMG_box,HMMSmart_SM00398,superfamily_HMG-box,HMMPfam_CTNNB1_binding	-	no_errors	Unknown	Unknown	Unknown	66	0	0	21	25	54.35	Somatic	1	27.092	4	3	42.86
3	132501002	132501002	A	C	SNP	LOC668858	XR_030605.1	mouse	genbank	58_37k	1	model	5_prime_flanking_region	c.-4164	NULL	-	-	-	-	pseudogene	Unknown	Unknown	Unknown	26	0	0	8	11	57.89	Somatic	0.999993	11.8334	45	32	41.56
3	134953823	134953823	C	T	SNP	Bdh2	NM_027208.2	mouse	genbank	58_37k	1	validated	intronic	c.249-135	e4-135	-	-	-	-	no_errors	Unknown	Unknown	Unknown	10	0	0	5	5	50	Somatic	0.984391	4.21473	0	0	0
3	135230324	135230324	A	T	SNP	Manba	NM_027288.3	mouse	genbank	58_37k	1	validated	intronic	c.2158-104	e16-104	-	-	-	-	no_errors	Unknown	Unknown	Unknown	31	0	0	11	16	59.26	Somatic	1	15.6013	0	0	0
3	137042662	137042662	A	T	SNP	Emcn	NM_016885.2	mouse	genbank	58_37k	1	validated	intronic	c.197-141	e3-141	-	-	-	-	no_errors	Unknown	Unknown	Unknown	14	0	0	4	4	50	Somatic	0.99131	4.74518	0	0	0
3	137086255	137086255	A	C	SNP	Emcn	NM_016885.2	mouse	genbank	58_37k	1	validated	intronic	c.651-133	e9-133	-	-	-	-	no_errors	Unknown	Unknown	Unknown	49	0	0	15	14	48.28	Somatic	1	16.1315	0	0	0
3	138087292	138087292	G	-	DEL	Adh4	NM_011996.2	mouse	genbank	58_37k	1	provisional	intronic	c.840+74	e6+74	-	-	-	-	no_errors	Unknown	Unknown	Unknown	22	0	0	18	10	35.71	Somatic	0.998572	6.54983	0	0	0
3	138106080	138106080	G	T	SNP	Adh5	NM_007410.2	mouse	genbank	58_37k	1	provisional	5_prime_flanking_region	c.-66	NULL	-	-	-	-	no_errors	Unknown	Unknown	Unknown	14	0	0	7	5	41.67	Somatic	0.988252	4.43733	4	5	55.56
3	138561366	138561366	G	A	SNP	Tspan5	NM_019571.4	mouse	genbank	58_37k	1	provisional	intronic	c.741+19	e7+19	-	-	-	-	no_errors	Unknown	Unknown	Unknown	26	0	0	17	19	52.78	Somatic	0.999998	13.0474	2	1	33.33
3	138969293	138969293	C	A	SNP	B930007M17Rik	NM_198659.2	mouse	genbank	58_37k	1	predicted	intronic	c.1006+29	e8+29	-	-	-	-	no_errors	Unknown	Unknown	Unknown	92	0	0	34	30	46.88	Somatic	1	31.2091	0	0	0
3	139082852	139082852	C	A	SNP	B930007M17Rik	NM_198659.2	mouse	genbank	58_37k	1	predicted	intronic	c.1417+24	e11+24	-	-	-	-	no_errors	Unknown	Unknown	Unknown	34	0	0	20	11	35.48	Somatic	0.999883	9.04936	0	0	0
3	141454622	141454622	C	A	SNP	Unc5c	NM_009472.3	mouse	genbank	58_37k	1	provisional	intronic	c.1646-134	e10-134	-	-	-	-	no_errors	Unknown	Unknown	Unknown	21	0	0	10	7	41.18	Somatic	0.998381	6.42484	0	0	0
3	142261194	142261194	G	T	SNP	Gbp1	NM_010259.2	mouse	genbank	58_37k	1	validated	missense	c.85	p.D29Y	-	HMMPfam_GBP,superfamily_SSF52540	HMMPfam_GBP_C,HMMPfam_GBP,superfamily_GBP,superfamily_SSF52540	-	no_errors	Unknown	Unknown	Unknown	30	0	0	12	13	52	Somatic	0.999996	12.4667	0	0	0
3	142300372	142300372	G	T	SNP	Gbp2	NM_010260.1	mouse	genbank	58_37k	1	provisional	missense	c.1685	p.G562V	-	HMMPfam_GBP_C,superfamily_GBP	HMMPfam_GBP_C,HMMPfam_GBP,superfamily_GBP,superfamily_SSF52540	-	no_errors	Unknown	Unknown	Unknown	41	0	0	25	11	30.56	Somatic	0.999878	9.00895	96	51	34.69
3	144509342	144509342	T	A	SNP	Clca4	NM_139148.2	mouse	genbank	58_37k	-1	provisional	missense	c.541	p.T181S	-	HMMPfam_CLCA_N	HMMPfam_VWA,HMMSmart_VWA,HMMSmart_FN3,HMMPfam_CLCA_N,HMMPfam_DUF1973,superfamily_SSF53300	-	no_errors	Unknown	Unknown	Unknown	79	0	0	36	31	46.27	Somatic	1	28.4377	0	0	0
3	144512119	144512119	T	A	SNP	Clca4	NM_139148.2	mouse	genbank	58_37k	-1	provisional	missense	c.131	p.E44V	-	HMMPfam_CLCA_N	HMMPfam_VWA,HMMSmart_VWA,HMMSmart_FN3,HMMPfam_CLCA_N,HMMPfam_DUF1973,superfamily_SSF53300	-	no_errors	Unknown	Unknown	Unknown	121	0	0	75	37	33.04	Somatic	1	29.7051	0	0	0
3	144578557	144578557	G	T	SNP	AI747448	NM_001033199.3	mouse	genbank	58_37k	-1	provisional	silent	c.1719	p.A573	-	HMMPfam_DUF1973	HMMPfam_VWA,HMMSmart_VWA,HMMPfam_CLCA_N,HMMPfam_DUF1973,superfamily_SSF53300	-	no_errors	Unknown	Unknown	Unknown	122	0	0	45	50	52.63	Somatic	1	50.1881	0	0	0
3	144595494	144595494	C	T	SNP	AI747448	NM_001033199.3	mouse	genbank	58_37k	-1	provisional	5_prime_untranslated_region	c.-31	NULL	-	-	-	-	no_errors	Unknown	Unknown	Unknown	155	0	0	70	35	33.33	Somatic	1	34.3257	0	0	0
3	144754954	144754954	C	A	SNP	Clca5	NM_178697.4	mouse	genbank	58_37k	-1	provisional	intronic	c.584+129	e4+129	-	-	-	-	no_errors	Unknown	Unknown	Unknown	10	0	0	6	6	50	Somatic	0.987658	4.47269	0	0	0
3	145029719	145029719	A	G	SNP	Col24a1	NM_027770.2	mouse	genbank	58_37k	1	validated	intronic	c.2314-90	e19-90	-	-	-	-	no_errors	Unknown	Unknown	Unknown	13	0	0	2	4	66.67	Somatic	0.996967	5.82867	0	0	0
3	145186960	145186960	T	G	SNP	Col24a1	NM_027770.2	mouse	genbank	58_37k	1	validated	intronic	c.4432-130	e54-130	-	-	-	-	no_errors	Unknown	Unknown	Unknown	16	0	0	8	6	42.86	Somatic	0.994971	5.29055	0	0	0
3	145756120	145756120	C	A	SNP	Wdr63	NM_172864.3	mouse	genbank	58_37k	-1	validated	intronic	c.1-88	e1-88	-	-	-	-	no_errors	Unknown	Unknown	Unknown	16	0	0	5	7	58.33	Somatic	0.999395	7.43426	0	0	0
3	145796834	145796834	A	T	SNP	Mcoln3	NM_134160.1	mouse	genbank	58_37k	1	provisional	nonsense	c.976	p.K326*	-	NULL	HMMPfam_Ion_trans	-	no_errors	Unknown	Unknown	Unknown	43	0	0	10	20	66.67	Somatic	1	23.3358	0	0	0
3	146085853	146085853	G	T	SNP	Ssx2ip	NM_138744.2	mouse	genbank	58_37k	1	provisional	splice_region	c.427-7	e4-7	-	-	-	-	no_errors	Unknown	Unknown	Unknown	18	0	0	13	5	27.78	Somatic	0.975628	3.68982	0	0	0
3	146275105	146275105	A	C	SNP	Dnase2b	NM_019957.4	mouse	genbank	58_37k	-1	validated	intronic	c.1+3232	e0+3232	-	-	-	-	no_errors	Unknown	Unknown	Unknown	23	0	0	15	4	21.05	Somatic	0.96066	3.1991	0	0	0
3	146642732	146642732	G	T	SNP	Ttll7	ENSMUST00000037942	mouse	ensembl	58_37k	1	known	3_prime_untranslated_region	c.*17	NULL	-	-	-	-	no_errors	Unknown	Unknown	Unknown	98	0	0	36	39	52	Somatic	1	39.4191	28	34	54.84
3	152319004	152319004	C	G	SNP	Ak5	NM_001081277.1	mouse	genbank	58_37k	-1	provisional	splice_region	c.248-4	e3-4	-	-	-	-	no_errors	Unknown	Unknown	Unknown	53	0	0	23	15	39.47	Somatic	1	14.7079	0	0	0
3	152379989	152379989	G	T	SNP	Pigk	NM_178016.3	mouse	genbank	58_37k	1	validated	intronic	c.94-37	e2-37	-	-	-	-	no_errors	Unknown	Unknown	Unknown	94	0	0	49	38	43.68	Somatic	1	32.4616	0	0	0
3	153507596	153507596	G	T	SNP	Asb17	NM_025758.4	mouse	genbank	58_37k	1	provisional	missense	c.300	p.W100C	-	HMMSmart_ANK	HMMPfam_SOCS_box,HMMSmart_ANK	-	no_errors	Unknown	Unknown	Unknown	54	0	0	16	20	55.56	Somatic	1	22.4002	0	0	0
3	153906621	153906621	G	T	SNP	Slc44a5	NM_001081263.1	mouse	genbank	58_37k	1	provisional	intronic	c.722+44	e9+44	-	-	-	-	no_errors	Unknown	Unknown	Unknown	97	0	0	42	43	50.59	Somatic	1	39.6192	0	0	0
3	153985396	153985396	C	T	SNP	Lhx8	NM_010713.2	mouse	genbank	58_37k	-1	validated	missense	c.482	p.G161D	-	HMMPfam_LIM,HMMSmart_LIM,PatternScan_LIM_DOMAIN_1,superfamily_SSF57716	HMMPfam_Homeobox,HMMSmart_HOX,HMMPfam_LIM,HMMSmart_LIM,PatternScan_LIM_DOMAIN_1,superfamily_Homeodomain_like,PatternScan_HOMEOBOX_1,superfamily_SSF57716	-	no_errors	Unknown	Unknown	Unknown	55	0	0	18	25	58.14	Somatic	1	25.8656	0	0	0
3	156225139	156225139	G	T	SNP	Negr1	NM_001039094.2	mouse	genbank	58_37k	1	provisional	5_prime_untranslated_region	c.-20	NULL	-	-	-	-	no_errors	Unknown	Unknown	Unknown	18	0	0	4	6	60	Somatic	0.999514	7.63721	0	0	0
3	156861355	156861355	G	T	SNP	Negr1	NM_001039094.2	mouse	genbank	58_37k	1	provisional	intronic	c.922+37654	e6+37654	-	-	-	-	no_errors	Unknown	Unknown	Unknown	174	0	0	51	49	49	Somatic	1	57.6318	0	0	0
3	157207940	157207940	G	T	SNP	Zranb2	NM_017381.2	mouse	genbank	58_37k	1	provisional	missense	c.783	p.R261S	-	NULL	HMMPfam_zf-RanBP,HMMSmart_SM00547,PatternScan_ZF_RANBP2_1,superfamily_Znf265 first zinc-finger domain	-	no_errors	Unknown	Unknown	Unknown	98	0	0	42	41	49.4	Somatic	1	38.3314	296	320	51.86
3	157790285	157790285	A	C	SNP	Lrrc7	NM_001081358.1	mouse	genbank	58_37k	-1	provisional	intronic	c.4354-14	e24-14	-	-	-	-	no_errors	Unknown	Unknown	Unknown	89	0	0	54	17	23.94	Somatic	0.999999	14.2014	0	0	0
3	157903583	157903583	A	C	SNP	Lrrc7	NM_001081358.1	mouse	genbank	58_37k	-1	provisional	intronic	c.549-107	e7-107	-	-	-	-	no_errors	Unknown	Unknown	Unknown	16	0	0	6	5	45.45	Somatic	0.994483	5.19756	0	0	0
3	159560317	159560317	G	T	SNP	Wls	NM_026582.3	mouse	genbank	58_37k	1	provisional	missense	c.402	p.M134I	-	HMMPfam_DUF1171	HMMPfam_DUF1171	-	no_errors	Unknown	Unknown	Unknown	88	0	0	48	38	44.19	Somatic	1	31.4139	378	370	49.4
4	3510463	3510463	G	-	DEL	Tgs1	NM_054089.4	mouse	genbank	58_37k	1	validated	intronic	c.105-109	e2-109	-	-	-	-	no_errors	Unknown	Unknown	Unknown	92	0	0	30	23	43.4	Somatic	1	26.2216	1	2	66.67
4	3541986	3541986	G	T	SNP	Tgs1	NM_054089.4	mouse	genbank	58_37k	1	validated	intronic	c.2416-20	e13-20	-	-	-	-	no_errors	Unknown	Unknown	Unknown	18	0	0	6	12	66.67	Somatic	0.999986	11.2763	2	1	33.33
4	3798085	3798085	G	T	SNP	LOC100045317	XM_001474286.1	mouse	genbank	58_37k	-1	model	nonsense	c.2529	p.C843*	-	NULL	NULL	-	pseudogene:no_stop_codon	Unknown	Unknown	Unknown	36	0	0	24	15	38.46	Somatic	0.999986	11.1835	0	0	0
4	3943538	3943538	G	C	SNP	Sdr16c5	NM_181989.1	mouse	genbank	58_37k	-1	provisional	missense	c.34	p.L12V	-	NULL	HMMPfam_adh_short,PatternScan_ADH_SHORT,superfamily_NAD(P)-bd	-	no_errors	Unknown	Unknown	Unknown	67	0	0	29	45	60.81	Somatic	1	38.0751	0	0	0
4	4003626	4003626	G	T	SNP	Sdr16c6	NM_001080710.2	mouse	genbank	58_37k	-1	provisional	intronic	c.321+98	e1+98	-	-	-	-	no_errors	Unknown	Unknown	Unknown	29	0	0	17	22	56.41	Somatic	1	15.8033	0	0	0
4	8678726	8678726	G	T	SNP	Chd7	NM_001081417.1	mouse	genbank	58_37k	1	provisional	silent	c.75	p.G25	-	NULL	HMMPfam_SNF2_N,HMMPfam_Chromo,HMMSmart_SM00298,HMMPfam_Helicase_C,HMMSmart_SM00490,HMMPfam_BRK,HMMSmart_SM00592,HMMSmart_SM00487,superfamily_Chromo domain-like,superfamily_P-loop containing nucleoside triphosphate hydrolases	-	no_errors	Unknown	Unknown	Unknown	73	0	0	31	38	55.07	Somatic	1	34.2774	48	28	36.36
4	8749620	8749620	G	T	SNP	Chd7	NM_001081417.1	mouse	genbank	58_37k	1	provisional	missense	c.2565	p.Q855H	-	NULL	HMMPfam_SNF2_N,HMMPfam_Chromo,HMMSmart_SM00298,HMMPfam_Helicase_C,HMMSmart_SM00490,HMMPfam_BRK,HMMSmart_SM00592,HMMSmart_SM00487,superfamily_Chromo domain-like,superfamily_P-loop containing nucleoside triphosphate hydrolases	-	no_errors	Unknown	Unknown	Unknown	30	0	0	12	15	55.56	Somatic	0.999999	14.0016	28	31	52.54
4	8761225	8761225	C	G	SNP	LOC100045099	XR_031479.1	mouse	genbank	58_37k	1	model	rna	NULL	NULL	-	-	-	-	pseudogene	Unknown	Unknown	Unknown	32	0	0	14	17	54.84	Somatic	1	15.0716	1	1	50
4	8774631	8774631	G	T	SNP	Chd7	NM_001081417.1	mouse	genbank	58_37k	1	provisional	missense	c.5048	p.R1683L	-	NULL	HMMPfam_SNF2_N,HMMPfam_Chromo,HMMSmart_SM00298,HMMPfam_Helicase_C,HMMSmart_SM00490,HMMPfam_BRK,HMMSmart_SM00592,HMMSmart_SM00487,superfamily_Chromo domain-like,superfamily_P-loop containing nucleoside triphosphate hydrolases	-	no_errors	Unknown	Unknown	Unknown	15	0	0	10	5	33.33	Somatic	0.978493	3.81837	35	31	46.97
4	9510522	9510522	T	A	SNP	Asph	ENSMUST00000076014	mouse	ensembl	58_37k	-1	known	missense	c.928	p.T310S	-	NULL	HMMPfam_Asp-B-Hydro_N	-	no_stop_codon	Unknown	Unknown	Unknown	18	0	0	14	10	41.67	Somatic	0.998599	6.57118	0	0	0
4	11639235	11639235	G	A	SNP	Gem	NM_010276.4	mouse	genbank	58_37k	1	validated	missense	c.524	p.R175H	-	HMMSmart_SM00173,HMMSmart_SM00174,HMMSmart_SM00175,HMMPfam_Ras,superfamily_P-loop containing nucleoside triphosphate hydrolases	HMMSmart_SM00173,HMMSmart_SM00174,HMMSmart_SM00175,HMMPfam_Ras,superfamily_P-loop containing nucleoside triphosphate hydrolases	-	no_errors	Unknown	Unknown	Unknown	56	0	0	31	9	22.5	Somatic	0.999658	7.97903	16	2	11.11
4	14752598	14752598	T	A	SNP	Otud6b	NM_152812.3	mouse	genbank	58_37k	-1	validated	intronic	c.237+48	e2+48	-	-	-	-	no_errors	Unknown	Unknown	Unknown	181	0	0	72	87	54.72	Somatic	1	82.0391	1	5	83.33
4	21667663	21667663	G	T	SNP	Ccnc	NM_016746.3	mouse	genbank	58_37k	1	validated	intronic	c.347-76	e6-76	-	-	-	-	no_errors	Unknown	Unknown	Unknown	23	0	0	8	9	52.94	Somatic	0.999912	9.34132	1	0	0
4	21743972	21743972	C	A	SNP	Usp45	NM_152825.2	mouse	genbank	58_37k	1	validated	intronic	c.1111-57	e11-57	-	-	-	-	no_errors	Unknown	Unknown	Unknown	47	0	0	21	14	40	Somatic	0.999999	13.4499	0	0	0
4	24609385	24609385	G	T	SNP	Klhl32	NM_001033531.3	mouse	genbank	58_37k	-1	validated	nonsense	c.345	p.Y115*	-	HMMSmart_SM00225,superfamily_POZ domain,HMMPfam_BTB	HMMSmart_SM00225,HMMPfam_Kelch_1,HMMSmart_SM00612,superfamily_Galactose oxidase central domain,superfamily_POZ domain,HMMPfam_BTB	-	no_errors	Unknown	Unknown	Unknown	40	0	0	11	15	57.69	Somatic	1	17.2584	0	0	0
4	24670911	24670911	G	T	SNP	Klhl32	NM_001033531.3	mouse	genbank	58_37k	-1	validated	intronic	c.312+94	e3+94	-	-	-	-	no_errors	Unknown	Unknown	Unknown	83	0	0	41	42	50.6	Somatic	1	35.5336	0	0	0
4	24728001	24728001	G	T	SNP	Klhl32	NM_001033531.3	mouse	genbank	58_37k	-1	validated	5_prime_untranslated_region	c.-26	NULL	-	-	-	-	no_errors	Unknown	Unknown	Unknown	42	0	0	23	10	30.3	Somatic	0.999847	8.78594	0	0	0
4	26296338	26296338	G	T	SNP	Bhmt-ps1	ENSMUST00000084767	mouse	ensembl	58_37k	-1	known	silent	c.1017	p.T339	-	superfamily_S_methyl_trans	HMMPfam_S-methyl_trans,superfamily_S_methyl_trans	-	no_errors	Unknown	Unknown	Unknown	234	0	0	114	119	51.07	Somatic	1	101.252	0	0	0
4	28744684	28744684	G	T	SNP	Epha7	NM_010141.3	mouse	genbank	58_37k	1	validated	intronic	c.162+25	e2+25	-	-	-	-	no_errors	Unknown	Unknown	Unknown	170	0	0	76	49	39.2	Somatic	1	47.2341	0	0	0
4	32061858	32061858	G	A	SNP	Map3k7	NM_172688.3	mouse	genbank	58_37k	1	validated	missense	c.181	p.A61T	-	HMMSmart_SM00219,HMMSmart_SM00220,superfamily_Protein kinase-like (PK-like),PatternScan_PROTEIN_KINASE_ATP,HMMPfam_Pkinase	HMMSmart_SM00219,HMMSmart_SM00220,PatternScan_PROTEIN_KINASE_ST,superfamily_Protein kinase-like (PK-like),PatternScan_PROTEIN_KINASE_ATP,HMMPfam_Pkinase	-	no_errors	Unknown	Unknown	Unknown	61	0	0	22	28	54.9	Somatic	1	27.7828	162	119	42.2
4	32836684	32836684	G	T	SNP	Mdn1	NM_001081392.1	mouse	genbank	58_37k	1	provisional	missense	c.12891	p.W4297C	-	NULL	HMMSmart_SM00327,HMMSmart_SM00382,HMMPfam_AAA_5,superfamily_P-loop containing nucleoside triphosphate hydrolases,superfamily_vWA-like	-	no_errors	Unknown	Unknown	Unknown	53	0	0	25	29	53.7	Somatic	1	24.7035	24	60	70.59
4	34611607	34611607	T	A	SNP	Slc35a1	NM_011895.3	mouse	genbank	58_37k	-1	validated	intronic	c.887-128	e8-128	-	-	-	-	no_errors	Unknown	Unknown	Unknown	9	0	0	5	7	58.33	Somatic	0.992311	5.12603	2	3	60
4	34663782	34663782	C	A	SNP	1700003M02Rik	NM_027041.4	mouse	genbank	58_37k	-1	validated	intronic	c.814-30	e7-30	-	-	-	-	no_errors	Unknown	Unknown	Unknown	5	0	0	4	6	60	Somatic	0.940549	3.31481	0	0	0
4	34763508	34763508	C	A	SNP	Zfp292	ENSMUST00000047950	mouse	ensembl	58_37k	-1	known	intronic	c.1014+15	e7+15	-	-	-	-	no_errors	Unknown	Unknown	Unknown	16	0	0	16	11	40.74	Somatic	0.997615	6.04107	0	0	0
4	35655868	35655868	T	A	SNP	Lingo2	NM_175516.4	mouse	genbank	58_37k	-1	validated	missense	c.1360	p.T454S	-	HMMSmart_SM00408,HMMSmart_SM00409,HMMPfam_I-set,superfamily_Immunoglobulin	HMMPfam_LRRNT,HMMSmart_SM00013,HMMPfam_LRR_1,HMMSmart_SM00369,HMMSmart_SM00408,HMMSmart_SM00409,HMMPfam_I-set,superfamily_Immunoglobulin,superfamily_L domain-like	-	no_errors	Unknown	Unknown	Unknown	66	0	0	19	24	55.81	Somatic	1	27.281	3	0	0
4	35655941	35655941	C	G	SNP	Lingo2	NM_175516.4	mouse	genbank	58_37k	-1	validated	missense	c.1287	p.Q429H	-	HMMSmart_SM00408,HMMSmart_SM00409,HMMPfam_I-set,superfamily_Immunoglobulin	HMMPfam_LRRNT,HMMSmart_SM00013,HMMPfam_LRR_1,HMMSmart_SM00369,HMMSmart_SM00408,HMMSmart_SM00409,HMMPfam_I-set,superfamily_Immunoglobulin,superfamily_L domain-like	-	no_errors	Unknown	Unknown	Unknown	71	0	0	32	20	38.46	Somatic	1	19.2469	0	0	0
4	39398745	39398745	G	A	SNP	1700009N14Rik	NM_001081095.1	mouse	genbank	58_37k	1	predicted	3_prime_untranslated_region	c.*266	NULL	-	-	-	-	no_errors	Unknown	Unknown	Unknown	90	0	0	33	30	47.62	Somatic	1	31.2211	0	0	0
4	40208852	40208852	C	A	SNP	Topors	NM_134097.3	mouse	genbank	58_37k	-1	validated	missense	c.1464	p.L488F	-	NULL	HMMSmart_SM00184,PatternScan_ZF_RING_1,HMMPfam_zf-C3HC4,PatternScan_AMP_BINDING,superfamily_RING/U-box	-	no_errors	Unknown	Unknown	Unknown	170	0	0	92	86	48.31	Somatic	1	69.5987	186	207	52.67
4	40924383	40924383	A	C	SNP	Nfx1	NM_023739.3	mouse	genbank	58_37k	1	validated	splice_region	c.1015+8	e2+8	-	-	-	-	no_errors	Unknown	Unknown	Unknown	47	0	0	27	27	50	Somatic	1	20.7364	0	0	0
4	40982674	40982674	G	C	SNP	Aqp7	NM_007473.4	mouse	genbank	58_37k	-1	validated	intronic	c.224-11	e3-11	-	-	-	-	no_errors	Unknown	Unknown	Unknown	18	0	0	9	10	52.63	Somatic	0.999739	8.26614	0	0	0
4	41606023	41606023	G	A	SNP	Cntfr	NM_016673.2	mouse	genbank	58_37k	-1	validated	intronic	c.769-31	e6-31	-	-	-	-	no_errors	Unknown	Unknown	Unknown	68	0	0	30	31	50.82	Somatic	1	28.1782	0	0	0
4	42090352	42090352	C	A	SNP	LOC100039894	XM_001473735.1	mouse	genbank	58_37k	1	model	missense	c.332	p.T111N	-	NULL	NULL	-	no_errors	Unknown	Unknown	Unknown	96	0	0	50	54	51.92	Somatic	1	43.6766	0	0	0
4	42969527	42969527	G	T	SNP	Dnajb5	NM_019874.3	mouse	genbank	58_37k	1	provisional	missense	c.341	p.S114I	-	superfamily_Chaperone J-domain	HMMPfam_DnaJ,HMMSmart_SM00271,superfamily_Chaperone J-domain,HMMPfam_DnaJ_C,superfamily_HSP40/DnaJ peptide-binding domain,PatternScan_DNAJ_1	-	no_errors	Unknown	Unknown	Unknown	37	0	0	25	18	41.86	Somatic	0.999998	13.0482	6	12	66.67
4	43228937	43228937	G	T	SNP	Unc13b	ENSMUST00000107952	mouse	ensembl	58_37k	1	known	missense	c.363	p.R121S	-	NULL	HMMPfam_C2,HMMSmart_C2,HMMPfam_C1_1,HMMSmart_C1,PatternScan_ZF_DAG_PE_1,superfamily_C2_CaLB,HMMPfam_DUF1041,HMMPfam_Membr_traf_MHD,superfamily_SSF57889	-	no_errors	Unknown	Unknown	Unknown	23	0	0	24	14	36.84	Somatic	0.99951	7.62023	0	0	0
4	43385638	43385638	C	G	SNP	4930417M19Rik	NM_177195.3	mouse	genbank	58_37k	1	validated	intronic	c.3366+39	e27+39	-	-	-	-	no_errors	Unknown	Unknown	Unknown	189	0	0	96	90	48.39	Somatic	1	75.9269	0	0	0
4	43456482	43456482	G	T	SNP	Tesk1	NM_011571.3	mouse	genbank	58_37k	1	validated	missense	c.176	p.G59V	-	superfamily_Kinase_like,PatternScan_PROTEIN_KINASE_ATP,HMMPfam_Pkinase	PatternScan_PROTEIN_KINASE_TYR,superfamily_Kinase_like,PatternScan_PROTEIN_KINASE_ATP,HMMPfam_Pkinase	-	no_errors	Unknown	Unknown	Unknown	45	0	0	31	20	39.22	Somatic	1	14.5199	45	37	45.12
4	43531984	43531984	C	T	SNP	Tpm2	NM_009416.3	mouse	genbank	58_37k	-1	provisional	intronic	c.563+115	e5+115	-	-	-	-	no_errors	Unknown	Unknown	Unknown	148	1	0.67	78	72	48	Somatic	1	56.2435	2	2	50
4	43580217	43580217	G	T	SNP	Gba2	NM_172692.3	mouse	genbank	58_37k	-1	validated	silent	c.2601	p.A867	-	HMMPfam_DUF608	HMMPfam_DUF608,superfamily_Glyco_trans_6hp	-	no_errors	Unknown	Unknown	Unknown	78	0	0	54	35	39.33	Somatic	1	25.3077	14	16	51.61
4	43678759	43678759	G	A	SNP	4930412F15Rik	NM_175517.3	mouse	genbank	58_37k	-1	predicted	silent	c.723	p.T241	-	NULL	NULL	-	no_errors	Unknown	Unknown	Unknown	109	0	0	61	59	49.17	Somatic	1	46.4054	0	0	0
4	43833969	43833969	G	T	SNP	Olfr156	NM_019474.2	mouse	genbank	58_37k	-1	validated	missense	c.263	p.P88H	-	HMMPfam_7tm_1,superfamily_SSF81321	HMMPfam_7tm_1,PatternScan_G_PROTEIN_RECEP_F1_1,superfamily_SSF81321	-	no_errors	Unknown	Unknown	Unknown	26	0	0	10	15	60	Somatic	0.999999	13.8091	0	0	0
4	44695590	44695590	T	G	SNP	Pax5	NM_008782.2	mouse	genbank	58_37k	-1	provisional	missense	c.426	p.K142N	-	NULL	HMMPfam_PAX,HMMSmart_SM00351,PatternScan_PAIRED_1,superfamily_Homeodomain-like	-	no_errors	Unknown	Unknown	Unknown	45	0	0	23	27	54	Somatic	1	21.7547	0	0	0
4	45032269	45032269	G	A	SNP	Polr1e	NM_022811.2	mouse	genbank	58_37k	1	provisional	intronic	c.225+20	e2+20	-	-	-	-	no_errors	Unknown	Unknown	Unknown	44	0	0	23	25	52.08	Somatic	1	20.1466	0	3	100
4	45057682	45057682	C	A	SNP	Fbxo10	ENSMUST00000140008	mouse	ensembl	58_37k	-1	known	missense	c.1304	p.R435L	-	HMMSmart_SM00710,HMMSmart_SM00722,superfamily_Pectin lyase-like	HMMSmart_SM00710,HMMSmart_SM00722,superfamily_Pectin lyase-like	-	pseudogene:no_stop_codon:bad_bp_length_for_coding_region	Unknown	Unknown	Unknown	30	0	0	21	9	30	Somatic	0.998813	6.73511	11	6	35.29
4	45057684	45057684	G	T	SNP	Fbxo10	ENSMUST00000052236	mouse	ensembl	58_37k	-1	known	missense	c.1822	p.P608T	-	HMMSmart_PbH1,HMMSmart_CASH,superfamily_Pectin_lyas_like	HMMPfam_F-box,HMMSmart_FBOX,HMMSmart_PbH1,HMMSmart_CASH,superfamily_Pectin_lyas_like,superfamily_SSF81383	-	no_errors	Unknown	Unknown	Unknown	29	0	0	21	9	30	Somatic	0.998616	6.58115	10	7	41.18
4	45061554	45061554	C	A	SNP	Fbxo10	ENSMUST00000052236	mouse	ensembl	58_37k	-1	known	intronic	c.1558-106	e4-106	-	-	-	-	no_errors	Unknown	Unknown	Unknown	6	0	0	3	7	70	Somatic	0.98468	4.79608	2	1	33.33
4	45282936	45282936	C	A	SNP	Frmpd1	NM_001081172.2	mouse	genbank	58_37k	1	validated	intronic	c.858+45	e8+45	-	-	-	-	no_errors	Unknown	Unknown	Unknown	13	0	0	8	8	50	Somatic	0.997019	5.86007	0	0	0
4	45284059	45284059	C	T	SNP	Frmpd1	NM_001081172.2	mouse	genbank	58_37k	1	validated	missense	c.916	p.L306F	-	HMMPfam_FERM_M,superfamily_FERM_3-hlx,HMMSmart_B41	HMMPfam_RA,HMMPfam_PDZ,HMMSmart_PDZ,superfamily_PDZ,PatternScan_FERM_1,PatternScan_FERM_2,HMMPfam_FERM_M,superfamily_FERM_3-hlx,HMMSmart_B41	-	no_errors	Unknown	Unknown	Unknown	21	0	0	13	15	53.57	Somatic	0.999975	10.6345	0	0	0
4	45895611	45895611	C	T	SNP	1300002K09Rik	NM_028788.3	mouse	genbank	58_37k	1	validated	silent	c.1449	p.N483	-	NULL	NULL	-	no_errors	Unknown	Unknown	Unknown	58	0	0	28	28	50	Somatic	1	24.1519	0	0	0
4	45912925	45912925	G	A	SNP	E230008N13Rik	ENSMUST00000149903	mouse	ensembl	58_37k	1	known	silent	c.588	p.K196	-	NULL	NULL	-	pseudogene:no_stop_codon:bad_bp_length_for_coding_region	Unknown	Unknown	Unknown	8	0	0	2	4	66.67	Somatic	0.985796	4.47629	0	0	0
4	45916860	45916861	-	C	INS	E230008N13Rik	ENSMUST00000043958	mouse	ensembl	58_37k	1	known	intronic	c.452+20_452+19	e4+20	-	-	-	-	no_errors	Unknown	Unknown	Unknown	31	0	0	17	5	22.73	Somatic	0.988536	4.45796	0	0	0
4	45957918	45957918	C	A	SNP	E230008N13Rik	ENSMUST00000107780	mouse	ensembl	58_37k	1	known	silent	c.268	p.R90	-	NULL	NULL	-	no_stop_codon	Unknown	Unknown	Unknown	38	0	0	31	22	41.51	Somatic	0.999999	13.9811	0	0	0
4	46197102	46197102	C	A	SNP	Xpa	NM_011728.2	mouse	genbank	58_37k	-1	validated	intronic	c.552+58	e4+58	-	-	-	-	no_errors	Unknown	Unknown	Unknown	23	0	0	14	13	48.15	Somatic	0.99994	9.72524	0	5	100
4	46622004	46622004	C	A	SNP	Tbc1d2	NM_198664.3	mouse	genbank	58_37k	-1	validated	intronic	c.2133-29	e10-29	-	-	-	-	no_errors	Unknown	Unknown	Unknown	69	0	0	21	33	61.11	Somatic	1	34.7522	0	0	0
4	46641334	46641334	C	A	SNP	Tbc1d2	NM_198664.3	mouse	genbank	58_37k	-1	validated	missense	c.866	p.R289L	-	NULL	HMMPfam_TBC,HMMSmart_TBC,superfamily_RabGAP_TBC,HMMPfam_PH,HMMSmart_PH,superfamily_SSF50729	-	no_errors	Unknown	Unknown	Unknown	49	0	0	16	18	52.94	Somatic	1	19.4013	9	7	43.75
4	46663007	46663007	C	A	SNP	Tbc1d2	NM_198664.3	mouse	genbank	58_37k	-1	validated	5_prime_untranslated_region	c.-101	NULL	-	-	-	-	no_errors	Unknown	Unknown	Unknown	16	0	0	8	10	55.56	Somatic	0.999672	8.071	0	2	100
4	46749481	46749481	C	G	SNP	Gabbr2	NM_001081141.1	mouse	genbank	58_37k	-1	provisional	intronic	c.1376-105	e10-105	-	-	-	-	no_errors	Unknown	Unknown	Unknown	19	0	0	5	6	54.55	Somatic	0.999282	7.24201	0	0	0
4	46800342	46800342	T	A	SNP	Gabbr2	NM_001081141.1	mouse	genbank	58_37k	-1	provisional	missense	c.1192	p.I398F	-	HMMPfam_ANF_receptor,superfamily_SSF53822	HMMPfam_ANF_receptor,HMMPfam_7tm_3,PatternScan_G_PROTEIN_RECEP_F3_1,PatternScan_G_PROTEIN_RECEP_F3_2,PatternScan_G_PROTEIN_RECEP_F3_3,superfamily_SSF53822	-	no_errors	Unknown	Unknown	Unknown	16	0	0	11	13	54.17	Somatic	0.999782	8.51033	0	0	0
4	46859258	46859258	C	A	SNP	Gabbr2	NM_001081141.1	mouse	genbank	58_37k	-1	provisional	silent	c.522	p.T174	-	HMMPfam_ANF_receptor,superfamily_SSF53822	HMMPfam_ANF_receptor,HMMPfam_7tm_3,PatternScan_G_PROTEIN_RECEP_F3_1,PatternScan_G_PROTEIN_RECEP_F3_2,PatternScan_G_PROTEIN_RECEP_F3_3,superfamily_SSF53822	-	no_errors	Unknown	Unknown	Unknown	31	0	0	18	20	52.63	Somatic	1	14.941	0	0	0
4	47036498	47036498	A	T	SNP	Anks6	NM_001024136.1	mouse	genbank	58_37k	-1	provisional	intronic	c.2301+118	e13+118	-	-	-	-	no_errors	Unknown	Unknown	Unknown	16	0	0	11	4	26.67	Somatic	0.955216	3.0613	1	0	0
4	47272679	47272679	G	T	SNP	Col15a1	NM_009928.3	mouse	genbank	58_37k	1	validated	intronic	c.1195-45	e9-45	-	-	-	-	no_errors	Unknown	Unknown	Unknown	8	0	0	5	4	44.44	Somatic	0.949488	3.01205	0	0	0
4	48480759	48480759	C	A	SNP	Tex10	NM_172304.3	mouse	genbank	58_37k	-1	provisional	missense	c.911	p.G304V	-	superfamily_ARM-type_fold	HMMPfam_HEAT,superfamily_ARM-type_fold	-	no_errors	Unknown	Unknown	Unknown	52	0	0	19	24	55.81	Somatic	1	23.6582	140	131	48.16
4	49396180	49396180	A	T	SNP	Acnat2	NM_145368.2	mouse	genbank	58_37k	-1	provisional	missense	c.244	p.S82T	-	HMMPfam_Bile_Hydr_Trans	HMMPfam_Bile_Hydr_Trans,HMMPfam_BAAT_C,superfamily_alpha/beta-Hydrolases	-	no_errors	Unknown	Unknown	Unknown	85	0	0	41	22	34.92	Somatic	1	20.6006	0	0	0
4	49527226	49527226	C	T	SNP	Mrpl50	NM_178603.4	mouse	genbank	58_37k	-1	provisional	missense	c.316	p.A106T	-	HMMPfam_Ribosomal_S39	HMMPfam_Ribosomal_S39	-	no_errors	Unknown	Unknown	Unknown	114	0	0	44	51	53.68	Somatic	1	49.3981	97	84	46.15
4	49535233	49535233	G	T	SNP	Zfp189	NM_145547.2	mouse	genbank	58_37k	1	validated	intronic	c.34-37	e2-37	-	-	-	-	no_errors	Unknown	Unknown	Unknown	49	0	0	24	4	14.29	Somatic	0.976263	3.74858	1	0	0
4	52623485	52623485	A	G	SNP	4930547C10Rik	NM_026652.2	mouse	genbank	58_37k	1	predicted	missense	c.505	p.S169G	-	NULL	NULL	-	no_errors	Unknown	Unknown	Unknown	117	0	0	69	36	34.29	Somatic	1	29.7171	0	2	100
4	53049643	53049643	C	G	SNP	Abca1	NM_013454.3	mouse	genbank	58_37k	-1	validated	intronic	c.6308+102	e46+102	-	-	-	-	no_errors	Unknown	Unknown	Unknown	61	0	0	25	28	52.83	Somatic	1	26.2861	0	0	0
4	53089678	53089678	C	A	SNP	Abca1	NM_013454.3	mouse	genbank	58_37k	-1	validated	intronic	c.2960+85	e19+85	-	-	-	-	no_errors	Unknown	Unknown	Unknown	28	0	0	16	13	44.83	Somatic	0.999969	10.378	1	0	0
4	53494309	53494309	G	A	SNP	Slc44a1	NM_133891.3	mouse	genbank	58_37k	1	validated	intronic	c.34-27	e2-27	-	-	-	-	no_errors	Unknown	Unknown	Unknown	72	0	0	38	38	50	Somatic	1	30.9035	0	0	0
4	55072990	55072990	G	A	SNP	Zfp462	NM_172867.3	mouse	genbank	58_37k	1	validated	missense	c.6904	p.E2302K	-	HMMPfam_zf-C2H2,PatternScan_ZINC_FINGER_C2H2_1,HMMSmart_ZnF_C2H2	HMMPfam_zf-C2H2,PatternScan_ZINC_FINGER_C2H2_1,HMMSmart_ZnF_C2H2,superfamily_SSF57667	-	no_errors	Unknown	Unknown	Unknown	92	0	0	95	16	14.41	Somatic	0.999909	9.29932	107	32	22.86
4	55612078	55612079	-	T	INS	ENSMUSG00000066176	ENSMUST00000084590	mouse	ensembl	58_37k	1	known	3_prime_untranslated_region	c.*152	NULL	-	-	-	-	no_errors	Unknown	Unknown	Unknown	21	0	0	17	9	34.62	Somatic	0.997456	5.97172	0	0	0
4	56805081	56805081	C	A	SNP	Ikbkap	NM_026079.3	mouse	genbank	58_37k	-1	validated	intronic	c.650-92	e7-92	-	-	-	-	no_errors	Unknown	Unknown	Unknown	39	0	0	26	13	33.33	Somatic	0.999951	9.92776	6	0	0
4	56893060	56893060	C	A	SNP	D730040F13Rik	ENSMUST00000125082	mouse	ensembl	58_37k	-1	known	5_prime_untranslated_region	c.-56893060	NULL	-	-	-	-	no_coding_region	Unknown	Unknown	Unknown	23	0	0	15	7	30.43	Somatic	0.995757	5.4582	51	48	48
4	57090190	57090190	G	T	SNP	Epb4.1l4b	XM_001476161.1	mouse	genbank	58_37k	-1	model	intronic	c.753-67	e8-67	-	-	-	-	no_errors	Unknown	Unknown	Unknown	63	0	0	32	37	53.62	Somatic	1	30.0286	0	0	0
4	57091866	57091866	C	G	SNP	Epb4.1l4b	XM_001476161.1	mouse	genbank	58_37k	-1	model	silent	c.633	p.A211	-	HMMPfam_FERM_M,superfamily_FERM_3-hlx,HMMSmart_B41	HMMPfam_FA,HMMPfam_FERM_N,HMMPfam_FERM_C,PatternScan_FERM_2,HMMPfam_FERM_M,superfamily_FERM_3-hlx,HMMSmart_B41,superfamily_SSF50729,superfamily_SSF54236	-	no_errors	Unknown	Unknown	Unknown	14	0	0	11	18	62.07	Somatic	0.999917	9.84427	3	6	66.67
4	59927743	59927743	C	T	SNP	Slc46a2	NM_021053.4	mouse	genbank	58_37k	-1	validated	silent	c.51	p.R17	-	NULL	HMMPfam_MFS_1,superfamily_MFS general substrate transporter	-	no_errors	Unknown	Unknown	Unknown	28	0	0	13	12	48	Somatic	0.999979	10.7601	0	0	0
4	60016489	60016489	G	T	SNP	Mup6	NM_001081285.1	mouse	genbank	58_37k	1	inferred	missense	c.69	p.M23I	-	NULL	HMMPfam_Lipocalin,PatternScan_LIPOCALIN,superfamily_Calycin	-	no_errors	Unknown	Unknown	Unknown	335	0	0	167	140	45.45	Somatic	1	121.724	0	0	0
4	61493790	61493790	C	A	SNP	Mup5	NM_008649.2	mouse	genbank	58_37k	-1	validated	intronic	c.416-103	e5-103	-	-	-	-	no_errors	Unknown	Unknown	Unknown	200	0	0	101	29	22.31	Somatic	1	27.198	0	0	0
4	61495620	61495620	C	A	SNP	Mup5	NM_008649.2	mouse	genbank	58_37k	-1	validated	nonsense	c.199	p.E67*	-	HMMPfam_Lipocalin,superfamily_Calycin	HMMPfam_Lipocalin,PatternScan_LIPOCALIN,superfamily_Calycin	-	no_errors	Unknown	Unknown	Unknown	378	0	0	201	55	21.48	Somatic	1	50.0047	0	0	0
4	62125008	62125008	C	A	SNP	Wdr31	NM_023597.1	mouse	genbank	58_37k	-1	provisional	silent	c.69	p.V23	-	PatternScan_TONB_DEPENDENT_REC_1,superfamily_WD40 repeat-like	HMMSmart_SM00320,PatternScan_TONB_DEPENDENT_REC_1,superfamily_WD40 repeat-like,PatternScan_WD_REPEATS_1,HMMPfam_WD40	-	no_errors	Unknown	Unknown	Unknown	38	0	0	36	28	43.75	Somatic	1	15.7027	6	7	53.85
4	62295346	62295346	G	T	SNP	Rgs3	NM_134257.3	mouse	genbank	58_37k	1	validated	intronic	c.832-134	e7-134	-	-	-	-	no_errors	Unknown	Unknown	Unknown	5	0	0	3	5	62.5	Somatic	0.941865	3.31886	0	0	0
4	62776327	62776327	G	A	SNP	Zfp618	ENSMUST00000107415	mouse	ensembl	58_37k	1	known	missense	c.934	p.A312T	-	NULL	HMMPfam_zf-C2H2,PatternScan_ZINC_FINGER_C2H2_1,HMMPfam_hATC,HMMSmart_SM00355,superfamily_C2H2 and C2HC zinc fingers	-	no_errors	Unknown	Unknown	Unknown	34	0	0	31	22	41.51	Somatic	0.999997	12.8853	0	1	100
4	63029049	63029049	C	T	SNP	Akna	NM_001045514.2	mouse	genbank	58_37k	-1	validated	3_prime_untranslated_region	c.*31	NULL	-	-	-	-	no_errors	Unknown	Unknown	Unknown	15	0	0	3	8	72.73	Somatic	0.999911	9.45205	6	1	14.29
4	63031421	63031421	C	T	SNP	Akna	NM_001045514.2	mouse	genbank	58_37k	-1	validated	intronic	c.3974+85	e20+85	-	-	-	-	no_errors	Unknown	Unknown	Unknown	18	0	0	2	5	71.43	Somatic	0.999706	8.14127	0	0	0
4	63122242	63122242	T	A	SNP	Whrn	ENSMUST00000140720	mouse	ensembl	58_37k	-1	known	5_prime_untranslated_region	c.-63122242	NULL	-	-	-	-	no_coding_region	Unknown	Unknown	Unknown	68	0	0	24	39	61.9	Somatic	1	37.2187	0	0	0
4	63272923	63272923	C	A	SNP	1700018C11Rik	NM_029324.2	mouse	genbank	58_37k	-1	predicted	missense	c.92	p.S31I	-	NULL	NULL	-	no_errors	Unknown	Unknown	Unknown	23	1	4.17	20	19	48.72	Somatic	0.999448	7.51499	0	0	0
4	63273564	63273564	A	T	SNP	1700018C11Rik	NM_029324.2	mouse	genbank	58_37k	-1	predicted	5_prime_untranslated_region	c.-83	NULL	-	-	-	-	no_errors	Unknown	Unknown	Unknown	164	0	0	81	81	50	Somatic	1	68.8318	0	0	0
4	63621583	63621584	-	AAA	INS	Tnc	NM_011607.2	mouse	genbank	58_37k	-1	validated	splice_region_ins	c.5950-7_5950-6	e25-6	-	-	-	-	no_errors	Unknown	Unknown	Unknown	41	0	0	28	4	12.5	Somatic	0.953005	3.0363	0	0	0
4	64837105	64837105	T	G	SNP	Pappa	NM_021362.1	mouse	genbank	58_37k	1	validated	intronic	c.1470-138	e3-138	-	-	-	-	no_errors	Unknown	Unknown	Unknown	24	0	0	6	9	60	Somatic	0.999978	10.7316	0	0	0
4	64954374	64954374	G	T	SNP	Pappa	NM_021362.1	mouse	genbank	58_37k	1	validated	missense	c.3160	p.D1054Y	-	NULL	HMMPfam_Sushi,HMMSmart_SM00032,HMMPfam_Notch,HMMSmart_SM00004,superfamily_Notch domain,HMMSmart_SM00560,HMMPfam_Peptidase_M43,superfamily_Concanavalin A-like lectins/glucanases,superfamily_Complement control module/SCR domain,superfamily_Metalloproteases	-	no_errors	Unknown	Unknown	Unknown	207	0	0	86	80	48.19	Somatic	1	76.8617	0	0	0
4	68424032	68424032	C	A	SNP	Dbc1	NM_019967.2	mouse	genbank	58_37k	-1	validated	missense	c.1294	p.G432W	-	NULL	HMMSmart_SM00457	-	no_errors	Unknown	Unknown	Unknown	47	0	0	14	23	62.16	Somatic	1	24.2958	0	0	0
4	68459958	68459958	C	A	SNP	Dbc1	NM_019967.2	mouse	genbank	58_37k	-1	validated	missense	c.686	p.G229V	-	HMMSmart_SM00457	HMMSmart_SM00457	-	no_errors	Unknown	Unknown	Unknown	51	0	0	21	20	48.78	Somatic	1	19.2505	0	0	0
4	68565770	68565770	C	A	SNP	Dbc1	NM_019967.2	mouse	genbank	58_37k	-1	validated	splice_site	c.218+1	e1+1	-	-	-	-	no_errors	Unknown	Unknown	Unknown	33	0	0	16	9	36	Somatic	0.999767	8.36436	0	0	0
4	69899346	69899346	G	T	SNP	Cdk5rap2	NM_145990.3	mouse	genbank	58_37k	-1	provisional	missense	c.4962	p.H1654Q	-	NULL	HMMPfam_Microtub_assoc	-	no_errors	Unknown	Unknown	Unknown	25	0	0	12	12	50	Somatic	0.999969	10.3896	68	43	38.74
4	70096392	70096392	C	A	SNP	Megf9	NM_172694.2	mouse	genbank	58_37k	-1	provisional	missense	c.1210	p.V404L	-	HMMPfam_Laminin_EGF,HMMSmart_SM00180,HMMSmart_SM00181,superfamily_EGF/Laminin	HMMPfam_Laminin_EGF,HMMSmart_SM00180,PatternScan_EGF_LAM_1,HMMSmart_SM00181,PatternScan_EGF_1,PatternScan_EGF_2,superfamily_EGF/Laminin	-	no_errors	Unknown	Unknown	Unknown	77	0	0	28	39	58.21	Somatic	1	37.8007	15	8	34.78
4	70195318	70195318	C	A	SNP	Megf9	NM_172694.2	mouse	genbank	58_37k	-1	provisional	missense	c.539	p.S180I	-	NULL	HMMPfam_Laminin_EGF,HMMSmart_SM00180,PatternScan_EGF_LAM_1,HMMSmart_SM00181,PatternScan_EGF_1,PatternScan_EGF_2,superfamily_EGF/Laminin	-	no_errors	Unknown	Unknown	Unknown	68	0	0	25	31	55.36	Somatic	1	30.5519	7	4	36.36
4	73989381	73989381	C	A	SNP	Kdm4c	NM_144787.2	mouse	genbank	58_37k	1	validated	missense	c.1888	p.Q630K	-	NULL	HMMSmart_PHD,HMMSmart_TUDOR,HMMSmart_JmjC,HMMPfam_JmjN,HMMSmart_JmjN,HMMPfam_JmjC,PatternScan_ZF_PHD_1,superfamily_SSF63748	-	no_errors	Unknown	Unknown	Unknown	90	0	0	33	36	52.17	Somatic	1	36.384	30	32	51.61
4	75774385	75774385	T	G	SNP	Ptprd	NM_011211.2	mouse	genbank	58_37k	-1	validated	splice_region	c.1564+4	e10+4	-	-	-	-	no_errors	Unknown	Unknown	Unknown	85	0	0	32	24	42.86	Somatic	1	25.2304	0	0	0
4	75774899	75774899	A	T	SNP	Ptprd	NM_011211.2	mouse	genbank	58_37k	-1	validated	missense	c.1054	p.S352T	-	HMMPfam_fn3,HMMSmart_FN3,superfamily_FN_III-like	HMMPfam_Y_phosphatase,HMMSmart_PTPc,HMMSmart_IGc2,HMMPfam_fn3,HMMSmart_FN3,superfamily_FN_III-like,HMMPfam_I-set,HMMPfam_ig,PatternScan_TYR_PHOSPHATASE_1,superfamily_SSF48726,superfamily_SSF52799	-	no_errors	Unknown	Unknown	Unknown	61	0	0	25	18	41.86	Somatic	1	18.07	0	0	0
4	80966480	80966480	T	A	SNP	Mpdz	NM_010820.2	mouse	genbank	58_37k	-1	validated	intronic	c.3417-53	e24-53	-	-	-	-	no_errors	Unknown	Unknown	Unknown	121	0	0	42	36	45.57	Somatic	1	39.0291	0	0	0
4	82580978	82580978	C	A	SNP	Frem1	NM_177863.4	mouse	genbank	58_37k	-1	provisional	intronic	c.5114-69	e26-69	-	-	-	-	no_errors	Unknown	Unknown	Unknown	27	0	0	10	8	44.44	Somatic	0.99978	8.42365	0	0	0
4	82872962	82872962	C	G	SNP	Ttc39b	ENSMUST00000143362	mouse	ensembl	58_37k	-1	known	5_prime_untranslated_region	c.-82872962	NULL	-	-	-	-	no_coding_region	Unknown	Unknown	Unknown	16	0	0	12	16	57.14	Somatic	0.999916	9.55897	207	199	49.01
4	83443966	83443966	G	C	SNP	4930473A06Rik	NM_001081012.1	mouse	genbank	58_37k	1	predicted	intronic	c.3606+2731	e23+2731	-	-	-	-	no_errors	Unknown	Unknown	Unknown	48	0	0	20	23	53.49	Somatic	1	21.2623	0	0	0
4	84037055	84037055	G	A	SNP	Bnc2	NM_172870.4	mouse	genbank	58_37k	-1	validated	intronic	c.284-27	e4-27	-	-	-	-	no_errors	Unknown	Unknown	Unknown	32	0	0	4	10	71.43	Somatic	1	15.3876	0	0	0
4	84746299	84746299	G	T	SNP	Cntln	NM_175275.3	mouse	genbank	58_37k	1	validated	missense	c.3639	p.K1213N	-	NULL	NULL	-	no_errors	Unknown	Unknown	Unknown	30	0	0	9	4	30.77	Somatic	0.993158	4.98187	47	7	12.96
4	86203850	86203850	C	T	SNP	Fam154a	NM_001081096.1	mouse	genbank	58_37k	-1	predicted	intronic	c.41+29	e1+29	-	-	-	-	no_errors	Unknown	Unknown	Unknown	28	0	0	12	7	36.84	Somatic	0.999084	6.99489	0	0	0
4	87828575	87828575	G	T	SNP	BC057079	NM_001081184.1	mouse	genbank	58_37k	1	predicted	missense	c.994	p.A332S	-	NULL	superfamily_ARM repeat	-	no_errors	Unknown	Unknown	Unknown	64	0	0	24	29	54.72	Somatic	1	28.3733	42	37	46.84
4	88236999	88236999	C	A	SNP	Ifna9	ENSMUST00000107145	mouse	ensembl	58_37k	-1	known	intronic	c.570-59	e2-59	-	-	-	-	no_stop_codon	Unknown	Unknown	Unknown	211	0	0	89	120	57.42	Somatic	1	106.592	0	0	0
4	88238145	88238145	G	T	SNP	Ifna9	NM_010507.1	mouse	genbank	58_37k	-1	provisional	missense	c.145	p.P49T	-	HMMPfam_Interferon,superfamily_4-helical cytokines	HMMPfam_Interferon,HMMSmart_SM00076,PatternScan_INTERFERON_A_B_D,superfamily_4-helical cytokines	-	no_errors	Unknown	Unknown	Unknown	184	0	0	104	94	47.47	Somatic	1	74.3086	0	0	0
4	88290254	88290254	C	A	SNP	Ifna13	NM_177347.2	mouse	genbank	58_37k	-1	provisional	silent	c.36	p.V12	-	HMMPfam_Interferon	HMMPfam_Interferon,HMMSmart_IFabd,PatternScan_INTERFERON_A_B_D,superfamily_4_helix_cytokine	-	no_errors	Unknown	Unknown	Unknown	155	0	0	101	89	46.84	Somatic	1	64.0922	0	0	0
4	89891915	89891915	C	T	SNP	Zfp352	NM_153102.3	mouse	genbank	58_37k	1	validated	missense	c.1594	p.L532F	-	HMMPfam_zf-C2H2,PatternScan_ZINC_FINGER_C2H2_1,HMMSmart_ZnF_C2H2	HMMPfam_zf-C2H2,PatternScan_ZINC_FINGER_C2H2_1,HMMSmart_ZnF_C2H2,superfamily_SSF57667	-	no_errors	Unknown	Unknown	Unknown	92	0	0	33	28	45.9	Somatic	1	29.8146	0	0	0
4	94447601	94447601	G	T	SNP	Tek	NM_013690.2	mouse	genbank	58_37k	1	validated	missense	c.147	p.W49C	-	HMMPfam_Ig_Tie2_1	HMMPfam_Pkinase_Tyr,HMMSmart_TyrKc,HMMPfam_Laminin_EGF,HMMSmart_EGF_Lam,HMMPfam_fn3,HMMSmart_FN3,HMMSmart_EGF,PatternScan_PROTEIN_KINASE_TYR,superfamily_FN_III-like,superfamily_Kinase_like,PatternScan_EGF_1,PatternScan_EGF_2,HMMPfam_EGF_2,PatternScan_PROT	-	no_errors	Unknown	Unknown	Unknown	51	0	0	27	24	47.06	Somatic	1	19.8759	1	0	0
4	94522127	94522127	A	G	SNP	Tek	NM_013690.2	mouse	genbank	58_37k	1	validated	splice_region	c.2683+4	e16+4	-	-	-	-	no_errors	Unknown	Unknown	Unknown	28	0	0	15	15	50	Somatic	0.999994	12.0775	0	0	0
4	94525745	94525745	G	C	SNP	Tek	NM_013690.2	mouse	genbank	58_37k	1	validated	silent	c.2850	p.G950	-	HMMPfam_Pkinase_Tyr,HMMSmart_TyrKc,superfamily_Kinase_like	HMMPfam_Pkinase_Tyr,HMMSmart_TyrKc,HMMPfam_Laminin_EGF,HMMSmart_EGF_Lam,HMMPfam_fn3,HMMSmart_FN3,HMMSmart_EGF,PatternScan_PROTEIN_KINASE_TYR,superfamily_FN_III-like,superfamily_Kinase_like,PatternScan_EGF_1,PatternScan_EGF_2,HMMPfam_EGF_2,PatternScan_PROT	-	no_errors	Unknown	Unknown	Unknown	211	0	0	101	89	46.84	Somatic	1	78.8335	0	0	0
4	96145827	96145827	T	G	SNP	ENSMUSG00000082932	ENSMUST00000120858	mouse	ensembl	58_37k	-1	novel	5_prime_untranslated_region	c.-96145827	NULL	-	-	-	-	no_coding_region:pseudogene	Unknown	Unknown	Unknown	92	0	0	49	26	34.67	Somatic	1	22.8928	0	0	0
4	96184930	96184930	C	A	SNP	Cyp2j6	NM_010008.4	mouse	genbank	58_37k	-1	validated	intronic	c.1328-34	e9-34	-	-	-	-	no_errors	Unknown	Unknown	Unknown	46	0	0	24	13	35.14	Somatic	0.999991	11.5761	0	0	0
4	97989143	97989143	C	A	SNP	0610025J13Rik	XM_355548.4	mouse	genbank	58_37k	1	model	missense	c.457	p.R153S	-	NULL	NULL	-	no_errors	Unknown	Unknown	Unknown	39	0	0	18	15	45.45	Somatic	0.999999	13.716	0	0	0
4	98612238	98612238	C	T	SNP	Dock7	NM_026082.4	mouse	genbank	58_37k	-1	validated	missense	c.5536	p.D1846N	-	NULL	HMMPfam_Ded_cyto	-	no_errors	Unknown	Unknown	Unknown	109	0	0	51	61	54.46	Somatic	1	51.9219	126	128	50.39
4	98654235	98654235	C	A	SNP	Dock7	NM_026082.4	mouse	genbank	58_37k	-1	validated	intronic	c.3208-50	e27-50	-	-	-	-	no_errors	Unknown	Unknown	Unknown	23	0	0	10	10	50	Somatic	0.999902	9.2269	0	0	0
4	98659108	98659108	C	A	SNP	Dock7	NM_026082.4	mouse	genbank	58_37k	-1	validated	missense	c.2808	p.E936D	-	NULL	HMMPfam_Ded_cyto	-	no_errors	Unknown	Unknown	Unknown	208	3	1.42	94	74	44.05	Somatic	1	60.1428	149	102	40.64
4	99323313	99323313	G	A	SNP	Foxd3	NM_010425.3	mouse	genbank	58_37k	1	validated	5_prime_untranslated_region	c.-3	NULL	-	-	-	-	no_errors	Unknown	Unknown	Unknown	11	0	0	4	7	63.64	Somatic	0.998047	6.43996	0	0	0
4	99439041	99439041	T	C	SNP	Itgb3bp	ENSMUST00000123045	mouse	ensembl	58_37k	-1	known	5_prime_untranslated_region	c.-99439041	NULL	-	-	-	-	no_coding_region	Unknown	Unknown	Unknown	24	0	0	18	12	40	Somatic	0.999718	8.17258	5	4	44.44
4	100007179	100007179	G	A	SNP	Ror1	NM_013845.4	mouse	genbank	58_37k	1	provisional	intronic	c.482+58	e4+58	-	-	-	-	no_errors	Unknown	Unknown	Unknown	110	0	0	47	43	47.78	Somatic	1	40.7014	0	0	0
4	100693100	100693100	G	C	SNP	ENSMUSG00000073789	ENSMUST00000097954	mouse	ensembl	58_37k	-1	known	missense	c.202	p.H68D	-	NULL	NULL	-	no_errors	Unknown	Unknown	Unknown	48	0	0	30	22	42.31	Somatic	1	16.7826	0	0	0
4	100829128	100829128	A	C	SNP	Jak1	NM_146145.2	mouse	genbank	58_37k	-1	validated	missense	c.3007	p.L1003V	-	HMMPfam_Pkinase_Tyr,HMMSmart_TyrKc,PatternScan_PROTEIN_KINASE_TYR,superfamily_Kinase_like	HMMSmart_SH2,HMMPfam_Pkinase_Tyr,HMMSmart_TyrKc,PatternScan_PROTEIN_KINASE_TYR,superfamily_Kinase_like,PatternScan_PROTEIN_KINASE_ATP,HMMSmart_B41,superfamily_SSF55550	-	no_errors	Unknown	Unknown	Unknown	110	0	0	86	32	27.12	Somatic	1	22.4079	345	209	37.66
4	100829201	100829201	C	A	SNP	Jak1	NM_146145.2	mouse	genbank	58_37k	-1	validated	intronic	c.2965-31	e21-31	-	-	-	-	no_errors	Unknown	Unknown	Unknown	74	0	0	46	42	47.73	Somatic	1	31.0597	1	4	80
4	101291232	101291232	T	A	SNP	Dnajc6	NM_198412.2	mouse	genbank	58_37k	1	validated	missense	c.1492	p.F498I	-	NULL	HMMPfam_DnaJ,HMMSmart_SM00271,superfamily_Chaperone J-domain,superfamily_C2 domain (Calcium/lipid-binding domain CaLB),HMMPfam_PTEN_C2,superfamily_(Phosphotyrosine protein) phosphatases II	-	no_errors	Unknown	Unknown	Unknown	65	0	0	31	21	40.38	Somatic	1	19.3326	0	0	0
4	101298398	101298398	G	T	SNP	Dnajc6	NM_198412.2	mouse	genbank	58_37k	1	validated	intronic	c.1897+32	e13+32	-	-	-	-	no_errors	Unknown	Unknown	Unknown	53	0	0	41	25	37.88	Somatic	1	16.8526	0	0	0
4	102228111	102228111	G	T	SNP	Pde4b	NM_019840.2	mouse	genbank	58_37k	1	validated	intronic	c.590-15260	e6-15260	-	-	-	-	no_errors	Unknown	Unknown	Unknown	22	0	0	17	21	55.26	Somatic	0.999996	12.497	0	0	0
4	102243206	102243206	G	C	SNP	Pde4b	ENSMUST00000097950	mouse	ensembl	58_37k	1	known	5_prime_untranslated_region	c.-47	NULL	-	-	-	-	no_errors	Unknown	Unknown	Unknown	16	0	0	1	5	83.33	Somatic	0.999861	8.92694	7	0	0
4	102628699	102628699	C	A	SNP	Sgip1	NM_144906.1	mouse	genbank	58_37k	1	provisional	splice_region	c.1565-5	e18-5	-	-	-	-	no_errors	Unknown	Unknown	Unknown	50	0	0	18	17	48.57	Somatic	1	17.7858	0	0	0
4	104184882	104184882	C	A	SNP	Dab1	NM_177259.3	mouse	genbank	58_37k	1	validated	intronic	c.67+33002	e1+33002	-	-	-	-	no_errors	Unknown	Unknown	Unknown	108	0	0	41	45	52.33	Somatic	1	44.4736	0	0	0
4	104400657	104400657	A	G	SNP	Dab1	NM_177259.3	mouse	genbank	58_37k	1	validated	missense	c.1388	p.D463G	-	NULL	HMMPfam_PID,HMMSmart_SM00462,superfamily_PH domain-like	-	no_errors	Unknown	Unknown	Unknown	198	0	0	173	18	9.38	Somatic	0.999987	11.2667	0	0	0
4	104457131	104457131	C	A	SNP	C8b	NM_133882.2	mouse	genbank	58_37k	1	provisional	missense	c.658	p.P220T	-	NULL	HMMPfam_TSP_1,HMMSmart_SM00209,superfamily_TSP-1 type 1 repeat,HMMPfam_MACPF,HMMSmart_SM00457,PatternScan_MAC_PERFORIN,HMMPfam_Ldl_recept_a,HMMSmart_SM00192,PatternScan_LDLRA_1,superfamily_LDL receptor-like module,PatternScan_EGF_1,PatternScan_EGF_2,super	-	no_errors	Unknown	Unknown	Unknown	20	0	0	9	8	47.06	Somatic	0.999364	7.36177	0	0	0
4	104712356	104712356	C	A	SNP	Prkaa2	NM_178143.2	mouse	genbank	58_37k	-1	validated	missense	c.1264	p.A422S	-	NULL	HMMSmart_S_TKc,PatternScan_PROTEIN_KINASE_ST,superfamily_Kinase_like,PatternScan_PROTEIN_KINASE_ATP,HMMPfam_Pkinase	-	no_errors	Unknown	Unknown	Unknown	225	0	0	84	110	56.7	Somatic	1	106.228	1	7	87.5
4	104830482	104830482	G	C	SNP	Ppap2b	NM_080555.2	mouse	genbank	58_37k	1	validated	missense	c.53	p.G18A	-	NULL	HMMPfam_PAP2,HMMSmart_SM00014,superfamily_Acid phosphatase/Vanadium-dependent haloperoxidase	-	no_errors	Unknown	Unknown	Unknown	32	0	0	16	7	30.43	Somatic	0.998512	6.50912	51	53	50.96
4	106048258	106048258	A	C	SNP	Usp24	ENSMUST00000094933	mouse	ensembl	58_37k	1	known	missense	c.2632	p.S878R	-	NULL	HMMPfam_UBA,HMMPfam_UCH,PatternScan_SUGAR_TRANSPORT_1,superfamily_UBA-like,PatternScan_UCH_2_1,PatternScan_UCH_2_2,superfamily_Cysteine proteinases,superfamily_Ubiquitin-like	-	no_errors	Unknown	Unknown	Unknown	44	0	0	27	28	50.91	Somatic	1	20.4086	139	110	44
4	106129502	106129502	G	T	SNP	Pcsk9	NM_153565.2	mouse	genbank	58_37k	-1	validated	missense	c.500	p.A167E	-	HMMPfam_Peptidase_S8,superfamily_Subtilisin-like	HMMPfam_Peptidase_S8,superfamily_Subtilisin-like,superfamily_Protease propeptides/inhibitors,HMMPfam_Inhibitor_I9	-	no_errors	Unknown	Unknown	Unknown	10	0	0	13	12	48	Somatic	0.992852	5.09276	259	298	53.41
4	106311885	106311885	C	A	SNP	Ttc22	NM_177667.4	mouse	genbank	58_37k	1	provisional	missense	c.1526	p.P509Q	-	NULL	HMMPfam_TPR_1,HMMSmart_SM00028,superfamily_TPR-like	-	no_errors	Unknown	Unknown	Unknown	16	0	0	12	6	33.33	Somatic	0.985592	4.22591	0	0	0
4	106382621	106382621	G	A	SNP	Gm1027	ENSMUST00000094928	mouse	ensembl	58_37k	-1	known	silent	c.1276	p.L426	-	NULL	superfamily_ARM-type_fold	-	no_errors	Unknown	Unknown	Unknown	23	0	0	13	10	43.48	Somatic	0.999699	8.10764	0	0	0
4	106382649	106382649	G	T	SNP	Gm1027	ENSMUST00000094928	mouse	ensembl	58_37k	-1	known	splice_region	c.1255-7	e4-7	-	-	-	-	no_errors	Unknown	Unknown	Unknown	19	0	0	9	7	43.75	Somatic	0.998268	6.3581	0	0	0
4	106710998	106710998	G	T	SNP	Ssbp3	NM_023672.2	mouse	genbank	58_37k	1	validated	intronic	c.801+136	e12+136	-	-	-	-	no_errors	Unknown	Unknown	Unknown	47	0	0	22	32	59.26	Somatic	1	26.0993	0	1	100
4	106775087	106775087	G	T	SNP	Cdcp2	NM_172873.3	mouse	genbank	58_37k	1	provisional	silent	c.93	p.G31	-	HMMPfam_CUB,HMMSmart_CUB,superfamily_CUB	HMMPfam_CUB,HMMSmart_CUB,superfamily_CUB	-	no_errors	Unknown	Unknown	Unknown	41	0	0	37	26	41.27	Somatic	1	15.3678	0	0	0
4	106777898	106777898	C	A	SNP	Cdcp2	NM_172873.3	mouse	genbank	58_37k	1	provisional	missense	c.662	p.T221N	-	HMMPfam_CUB,HMMSmart_CUB,superfamily_CUB	HMMPfam_CUB,HMMSmart_CUB,superfamily_CUB	-	no_errors	Unknown	Unknown	Unknown	47	0	0	15	24	61.54	Somatic	1	24.461	0	0	0
4	106970291	106970291	A	T	SNP	Dio1	NM_007860.3	mouse	genbank	58_37k	-1	reviewed	missense	c.392	p.L131H	-	HMMPfam_T4_deiodinase	HMMPfam_T4_deiodinase	-	pseudogene	Unknown	Unknown	Unknown	41	0	0	24	32	57.14	Somatic	1	22.8533	0	0	0
4	106988428	106988428	G	T	SNP	Yipf1	NM_145550.2	mouse	genbank	58_37k	1	provisional	silent	c.12	p.V4	-	NULL	HMMPfam_Yip1	-	no_errors	Unknown	Unknown	Unknown	134	0	0	75	66	46.81	Somatic	1	52.7539	109	114	50.67
4	107481123	107481123	G	T	SNP	B230314M03Rik	ENSMUST00000097930	mouse	ensembl	58_37k	-1	known	5_prime_untranslated_region	c.-1395	NULL	-	-	-	-	no_errors	Unknown	Unknown	Unknown	32	0	0	15	24	61.54	Somatic	1	19.1136	1	2	66.67
4	107515947	107515947	C	A	SNP	Lrp8	ENSMUST00000106734	mouse	ensembl	58_37k	1	known	missense	c.476	p.T159N	-	HMMPfam_Ldl_recept_a,HMMSmart_SM00192,superfamily_LDL receptor-like module	HMMPfam_Ldl_recept_b,HMMSmart_SM00135,PatternScan_ASX_HYDROXYL,HMMSmart_SM00179,HMMPfam_Ldl_recept_a,HMMSmart_SM00192,PatternScan_LDLRA_1,superfamily_LDL receptor-like module,HMMPfam_EGF,HMMSmart_SM00181,PatternScan_EGF_2,HMMPfam_EGF_CA,PatternScan_EGF_CA	-	no_errors	Unknown	Unknown	Unknown	38	0	0	28	26	48.15	Somatic	1	17.002	82	89	52.05
4	107595920	107595920	C	T	SNP	Cpt2	NM_009949.2	mouse	genbank	58_37k	-1	validated	missense	c.152	p.R51K	-	HMMPfam_Carn_acyltransf,PatternScan_ACYLTRANSF_C_1,superfamily_SSF52777	HMMPfam_Carn_acyltransf,PatternScan_ACYLTRANSF_C_1,PatternScan_ACYLTRANSF_C_2,superfamily_SSF52777	-	no_errors	Unknown	Unknown	Unknown	30	0	0	13	18	58.06	Somatic	1	15.6209	71	0	0
4	107687580	107687580	A	T	SNP	Podn	ENSMUST00000084370	mouse	ensembl	58_37k	-1	known	missense	c.1505	p.V502E	-	NULL	HMMPfam_LRRNT,HMMSmart_SM00013,HMMPfam_LRR_1,HMMSmart_SM00369,HMMSmart_SM00364,superfamily_L domain-like	-	no_errors	Unknown	Unknown	Unknown	85	0	0	39	46	54.12	Somatic	1	39.7701	1	0	0
4	107914878	107914878	C	G	SNP	Zyg11b	NM_001033634.3	mouse	genbank	58_37k	-1	validated	intronic	c.1696-76	e11-76	-	-	-	-	no_errors	Unknown	Unknown	Unknown	7	0	0	5	9	64.29	Somatic	0.989592	5.14613	0	0	0
4	108297153	108297153	G	T	SNP	Cc2d1b	NM_177045.3	mouse	genbank	58_37k	1	provisional	splice_site	c.315+1	e3+1	-	-	-	-	no_errors	Unknown	Unknown	Unknown	30	0	0	19	15	44.12	Somatic	0.999987	11.2159	3	24	88.89
4	109099086	109099086	T	G	SNP	Ttc39a	NM_153392.2	mouse	genbank	58_37k	1	validated	intronic	c.485+116	e6+116	-	-	-	-	no_errors	Unknown	Unknown	Unknown	115	0	0	110	9	7.56	Somatic	0.993941	5.10391	0	0	0
4	109654959	109654959	A	G	SNP	Dmrta2	NM_172296.2	mouse	genbank	58_37k	1	validated	missense	c.1297	p.N433D	-	NULL	HMMPfam_DM,HMMSmart_DM,PatternScan_DM_1,superfamily_DM_DNA_bd,HMMPfam_DMA	-	no_errors	Unknown	Unknown	Unknown	25	0	0	9	12	57.14	Somatic	0.999993	11.81	0	6	100
4	111106196	111106197	-	G	INS	Bend5	NM_026279.2	mouse	genbank	58_37k	1	provisional	intronic	c.745+38_745+37	e3+38	-	-	-	-	no_errors	Unknown	Unknown	Unknown	9	0	0	5	6	54.55	Somatic	0.987524	4.54773	0	0	0
4	111447281	111447281	A	T	SNP	Spata6	NM_026470.3	mouse	genbank	58_37k	1	validated	intronic	c.406-123	e6-123	-	-	-	-	no_errors	Unknown	Unknown	Unknown	8	0	0	6	5	45.45	Somatic	0.960368	3.29084	0	0	0
4	111501024	111501024	G	T	SNP	Spata6	NM_026470.3	mouse	genbank	58_37k	1	validated	3_prime_untranslated_region	c.*53	NULL	-	-	-	-	no_errors	Unknown	Unknown	Unknown	20	0	0	12	12	50	Somatic	0.999869	8.94538	51	67	56.78
4	112296971	112296971	G	T	SNP	Skint2	NM_177865.4	mouse	genbank	58_37k	1	provisional	splice_region	c.415+10	e2+10	-	-	-	-	no_errors	Unknown	Unknown	Unknown	25	0	0	7	10	58.82	Somatic	0.999987	11.2841	0	0	0
4	112663952	112664007	TTTTTACAATGAGGTTTTTTTGTTTTTGTTTTTGTTTTTGTTTTTTTTTTGGTGGG	-	DEL	LOC433745	XM_001475733.1	mouse	genbank	58_37k	-1	model	5_prime_flanking_region	c.-35061	NULL	-	-	-	-	no_errors	Unknown	Unknown	Unknown	NA	NA	NA	NA	NA	NA	Somatic	NA	NA	NA	NA	NA
4	113389561	113389561	G	A	SNP	-	-	-	-	-	-	-	-	-	-	-	-	-	-	-	-	-	-	89	0	0	20	16	44.44	Somatic	1	22.1958	0	0	0
4	114517667	114517667	C	A	SNP	ENSMUSG00000055198	ENSMUST00000068632	mouse	ensembl	58_37k	1	known	missense	c.423	p.S141R	-	NULL	NULL	-	no_errors	Unknown	Unknown	Unknown	133	0	0	68	71	51.08	Somatic	1	58.5118	0	0	0
4	114785537	114785537	G	T	SNP	Cyp4x1	NM_001003947.	mouse	genbank	58_37k	-1	provisional	missense	c.1075	p.L359M	-	HMMPfam_p450,superfamily_Cytochrome_P450	HMMPfam_p450,superfamily_Cytochrome_P450,PatternScan_CYTOCHROME_P450	-	no_errors	Unknown	Unknown	Unknown	45	0	0	21	37	63.79	Somatic	1	28.8369	0	0	0
4	115164905	115164905	C	A	SNP	Cyp4a14	NM_007822.2	mouse	genbank	58_37k	-1	validated	intronic	c.627-65	e6-65	-	-	-	-	no_errors	Unknown	Unknown	Unknown	15	0	0	11	12	52.17	Somatic	0.999479	7.62749	0	0	0
4	115165074	115165074	G	C	SNP	Cyp4a14	NM_007822.2	mouse	genbank	58_37k	-1	validated	intronic	c.626+141	e5+141	-	-	-	-	no_errors	Unknown	Unknown	Unknown	36	0	0	12	23	65.71	Somatic	1	21.8525	0	0	0
4	115167437	115167437	T	A	SNP	Cyp4a14	NM_007822.2	mouse	genbank	58_37k	-1	validated	intronic	c.328+54	e2+54	-	-	-	-	no_errors	Unknown	Unknown	Unknown	43	0	0	30	20	40	Somatic	0.999999	14.3308	0	0	0
4	115197979	115197979	G	T	SNP	Cyp4a10	NM_010011.3	mouse	genbank	58_37k	1	validated	missense	c.860	p.R287L	-	HMMPfam_p450,superfamily_Cytochrome_P450	HMMPfam_p450,superfamily_Cytochrome_P450,PatternScan_CYTOCHROME_P450	-	no_errors	Unknown	Unknown	Unknown	143	0	0	80	99	55.31	Somatic	1	74.1892	0	0	0
4	115592804	115592804	G	T	SNP	Dmbx1	NM_130865.3	mouse	genbank	58_37k	-1	validated	missense	c.466	p.P156T	-	NULL	HMMPfam_Homeobox,HMMSmart_SM00389,HMMPfam_OAR,superfamily_Homeodomain-like,PatternScan_HOMEOBOX_1	-	no_errors	Unknown	Unknown	Unknown	100	0	0	54	47	46.53	Somatic	1	38.5465	0	0	0
4	115672640	115672640	G	T	SNP	Faah	ENSMUST00000051237	mouse	ensembl	58_37k	-1	known	missense	c.1370	p.P457H	-	HMMPfam_Amidase	HMMPfam_Amidase,superfamily_Amidase_sig_enz,PatternScan_AMIDASES	-	no_errors	Unknown	Unknown	Unknown	113	0	0	90	77	46.11	Somatic	1	48.3025	0	0	0
4	115761568	115761568	G	A	SNP	Lrrc41	NM_153521.1	mouse	genbank	58_37k	1	provisional	missense	c.808	p.D270N	-	NULL	HMMSmart_SM00368,superfamily_RNI-like	-	no_errors	Unknown	Unknown	Unknown	19	0	0	8	11	57.89	Somatic	0.999939	9.74091	167	146	46.5
4	115778515	115778515	T	C	SNP	Rad54l	NM_009015.3	mouse	genbank	58_37k	-1	validated	splice_site	c.892-2	e9-2	-	-	-	-	no_errors	Unknown	Unknown	Unknown	22	0	0	14	12	46.15	Somatic	0.999853	8.82615	0	2	100
4	115795603	115795603	G	A	SNP	Rad54l	NM_009015.3	mouse	genbank	58_37k	-1	validated	intronic	c.4-16	e2-16	-	-	-	-	no_errors	Unknown	Unknown	Unknown	93	0	0	68	54	44.26	Somatic	1	36.4823	3	1	25
4	116196754	116196754	A	T	SNP	Ipp	NM_008389.3	mouse	genbank	58_37k	1	provisional	intronic	c.881-37	e4-37	-	-	-	-	no_errors	Unknown	Unknown	Unknown	20	0	0	15	14	48.28	Somatic	0.999879	9.03018	0	0	0
4	116365642	116365642	G	A	SNP	Prdx1	NM_011034.4	mouse	genbank	58_37k	1	provisional	intronic	c.383+32	e3+32	-	-	-	-	no_errors	Unknown	Unknown	Unknown	69	0	0	40	31	43.66	Somatic	1	24.6845	0	0	0
4	116652361	116652361	G	T	SNP	Zswim5	NM_001029912.2	mouse	genbank	58_37k	1	provisional	intronic	c.2164+72	e9+72	-	-	-	-	no_errors	Unknown	Unknown	Unknown	75	0	0	23	32	58.18	Somatic	1	34.4119	0	0	0
4	116659128	116659128	G	T	SNP	Zswim5	NM_001029912.2	mouse	genbank	58_37k	1	provisional	silent	c.2757	p.P919	-	NULL	HMMPfam_SWIM	-	no_errors	Unknown	Unknown	Unknown	93	0	0	42	49	53.85	Somatic	1	42.8953	3	1	25
4	116778568	116778568	C	A	SNP	Ptch2	NM_008958.2	mouse	genbank	58_37k	1	provisional	missense	c.646	p.L216M	-	HMMPfam_Patched	HMMPfam_Patched,superfamily_Multidrug efflux transporter AcrB transmembrane domain	-	no_errors	Unknown	Unknown	Unknown	119	0	0	59	49	45.37	Somatic	1	42.8147	0	0	0
4	116780636	116780636	C	A	SNP	Ptch2	ENSMUST00000137209	mouse	ensembl	58_37k	1	known	silent	c.417	p.S139	-	NULL	NULL	-	pseudogene:no_stop_codon:bad_bp_length_for_coding_region	Unknown	Unknown	Unknown	67	0	0	44	48	52.17	Somatic	1	33.0243	0	0	0
4	116784288	116784288	G	T	SNP	Ptch2	NM_008958.2	mouse	genbank	58_37k	1	provisional	intronic	c.3114+31	e19+31	-	-	-	-	no_errors	Unknown	Unknown	Unknown	24	0	0	15	15	50	Somatic	0.999981	10.8699	0	0	0
4	116793819	116793819	C	A	SNP	Btbd19	ENSMUST00000106445	mouse	ensembl	58_37k	-1	known	missense	c.296	p.W99L	-	HMMPfam_BACK	HMMPfam_BACK	-	no_errors	Unknown	Unknown	Unknown	63	0	0	48	41	46.07	Somatic	1	26.5678	28	21	42.86
4	116793820	116793820	A	T	SNP	Btbd19	ENSMUST00000106445	mouse	ensembl	58_37k	-1	known	missense	c.295	p.W99R	-	HMMPfam_BACK	HMMPfam_BACK	-	no_errors	Unknown	Unknown	Unknown	63	0	0	48	41	46.07	Somatic	1	26.5678	28	21	42.86
4	116817940	116817940	A	T	SNP	Best4-ps	ENSMUST00000050848	mouse	ensembl	58_37k	1	known	missense	c.79	p.S27C	-	HMMPfam_Bestrophin	HMMPfam_Bestrophin	-	no_errors	Unknown	Unknown	Unknown	26	0	0	14	18	56.25	Somatic	0.999999	13.7325	0	0	0
4	116819657	116819657	C	A	SNP	Best4-ps	ENSMUST00000050848	mouse	ensembl	58_37k	1	known	intronic	c.622-80	e6-80	-	-	-	-	no_errors	Unknown	Unknown	Unknown	77	0	0	29	38	56.72	Somatic	1	36.4919	0	0	0
4	116828159	116828159	C	A	SNP	Rps8	ENSMUST00000140226	mouse	ensembl	58_37k	-1	known	5_prime_untranslated_region	c.-116828159	NULL	-	-	-	-	no_coding_region	Unknown	Unknown	Unknown	24	0	0	16	18	52.94	Somatic	0.999995	12.1745	23	11	32.35
4	116886297	116886297	C	A	SNP	ENSMUSG00000086482	ENSMUST00000141554	mouse	ensembl	58_37k	-1	novel	intronic	c.NULL	NULL	-	-	-	-	no_coding_region	Unknown	Unknown	Unknown	32	0	0	23	20	46.51	Somatic	0.999999	13.4714	0	0	0
4	118145462	118145462	A	T	SNP	Tie1	NM_011587.2	mouse	genbank	58_37k	-1	validated	silent	c.3168	p.A1056	-	HMMPfam_Pkinase_Tyr,HMMSmart_TyrKc,superfamily_Kinase_like	HMMPfam_Pkinase_Tyr,HMMSmart_TyrKc,HMMPfam_Laminin_EGF,HMMSmart_IG,HMMPfam_fn3,HMMSmart_FN3,HMMSmart_EGF,PatternScan_PROTEIN_KINASE_TYR,superfamily_FN_III-like,superfamily_Kinase_like,PatternScan_EGF_1,PatternScan_EGF_2,HMMPfam_EGF_2,HMMPfam_ig,PatternSca	-	no_errors	Unknown	Unknown	Unknown	50	0	0	42	24	36.36	Somatic	1	15.3743	0	0	0
4	118201756	118201756	G	T	SNP	2610528J11Rik	NM_025572.2	mouse	genbank	58_37k	1	predicted	intronic	c.1-48	e1-48	-	-	-	-	no_errors	Unknown	Unknown	Unknown	13	0	0	3	4	57.14	Somatic	0.993793	5.09704	0	0	0
4	118215040	118215040	C	A	SNP	Tmem125	NM_172383.3	mouse	genbank	58_37k	-1	validated	intronic	c.1-64	e1-64	-	-	-	-	no_errors	Unknown	Unknown	Unknown	35	0	0	21	18	45	Somatic	0.999999	13.7854	0	0	0
4	118215041	118215041	A	T	SNP	Tmem125	NM_172383.3	mouse	genbank	58_37k	-1	validated	intronic	c.1-65	e1-65	-	-	-	-	no_errors	Unknown	Unknown	Unknown	35	0	0	22	17	43.59	Somatic	0.999997	12.8192	0	0	0
4	118255474	118255474	G	T	SNP	Wdr65	ENSMUST00000071972	mouse	ensembl	58_37k	-1	known	silent	c.2319	p.T773	-	superfamily_WD40_like	HMMSmart_WD40,superfamily_Prefoldin,superfamily_WD40_like,HMMPfam_WD40	-	no_errors	Unknown	Unknown	Unknown	85	0	0	46	40	46.51	Somatic	1	32.763	0	0	0
4	118634603	118634603	C	T	SNP	Lao1	NM_133892.4	mouse	genbank	58_37k	1	validated	5_prime_untranslated_region	c.-1	NULL	-	-	-	-	no_errors	Unknown	Unknown	Unknown	34	0	0	11	16	59.26	Somatic	1	16.511	0	0	0
4	118640648	118640648	G	T	SNP	Lao1	NM_133892.4	mouse	genbank	58_37k	1	validated	missense	c.1059	p.K353N	-	HMMPfam_Amino_oxidase,superfamily_SSF51905,superfamily_SSF54373	HMMPfam_Amino_oxidase,superfamily_SSF51905,superfamily_SSF54373	-	no_errors	Unknown	Unknown	Unknown	60	0	0	28	28	50	Somatic	1	24.6898	0	0	0
4	118852580	118852580	T	G	SNP	Ermap	NM_013848.2	mouse	genbank	58_37k	-1	validated	silent	c.1045	p.R349	-	NULL	HMMSmart_IGv,HMMPfam_SPRY,HMMSmart_PRY,HMMPfam_V-set,HMMSmart_SPRY,superfamily_SSF48726	-	no_errors	Unknown	Unknown	Unknown	39	0	0	29	21	42	Somatic	0.999999	14.2206	0	0	0
4	118932249	118932249	C	A	SNP	Cldn19	NM_153105.7	mouse	genbank	58_37k	1	validated	3_prime_untranslated_region	c.*674	NULL	-	-	-	-	no_errors	Unknown	Unknown	Unknown	116	0	0	56	89	61.38	Somatic	1	69.5982	0	0	0
4	120550730	120550730	G	T	SNP	Rims3	NM_182929.2	mouse	genbank	58_37k	1	provisional	intronic	c.217+40	e1+40	-	-	-	-	no_errors	Unknown	Unknown	Unknown	8	0	0	5	9	64.29	Somatic	0.994243	5.67858	0	0	0
4	120607593	120607593	C	A	SNP	Zfp69	NM_001005788.3	mouse	genbank	58_37k	-1	validated	intronic	c.34+79	e1+79	-	-	-	-	no_errors	Unknown	Unknown	Unknown	28	0	0	18	21	53.85	Somatic	0.999999	14.4633	0	0	0
4	120647067	120647067	C	A	SNP	Smap2	NM_133716.3	mouse	genbank	58_37k	-1	validated	missense	c.602	p.S201I	-	NULL	HMMPfam_ArfGap,HMMSmart_SM00105,superfamily_Pyk2-associated protein beta ARF-GAP domain	-	no_errors	Unknown	Unknown	Unknown	30	0	0	8	15	65.22	Somatic	1	16.4149	44	57	56.44
4	120712274	120712274	C	A	SNP	Col9a2	NM_007741.2	mouse	genbank	58_37k	1	validated	5_prime_untranslated_region	c.-46	NULL	-	-	-	-	no_errors	Unknown	Unknown	Unknown	21	0	0	8	9	52.94	Somatic	0.999854	8.83654	0	0	0
4	121088104	121088105	-	T	INS	ENSMUSG00000078576	ENSMUST00000106266	mouse	ensembl	58_37k	-1	known	3_prime_untranslated_region	c.*3	NULL	-	-	-	-	no_errors	Unknown	Unknown	Unknown	304	0	0	113	103	47.69	Somatic	1	106.273	0	0	0
4	122971959	122971959	G	T	SNP	Pabpc4	NM_130881.2	mouse	genbank	58_37k	1	provisional	nonsense	c.1117	p.E373*	-	superfamily_SSF54928	HMMPfam_RRM_1,HMMSmart_RRM,HMMPfam_PABP,HMMSmart_PolyA,superfamily_PABP_HYD,superfamily_SSF54928	-	no_errors	Unknown	Unknown	Unknown	26	0	0	15	14	48.28	Somatic	0.999981	10.8547	466	37	7.36
4	123085405	123085405	A	T	SNP	Macf1	ENSMUST00000084301	mouse	ensembl	58_37k	-1	known	intronic	c.15709-6250	e61-6250	-	-	-	-	no_errors	Unknown	Unknown	Unknown	93	0	0	41	40	49.38	Somatic	1	36.7365	175	34	16.27
4	124363483	124363483	C	A	SNP	Utp11l	NM_026031.3	mouse	genbank	58_37k	-1	provisional	intronic	c.64-89	e2-89	-	-	-	-	no_errors	Unknown	Unknown	Unknown	50	0	0	26	16	38.1	Somatic	0.999999	14.0947	2	1	33.33
4	124470527	124470527	G	T	SNP	Inpp5b	NM_008385.3	mouse	genbank	58_37k	1	provisional	silent	c.2301	p.R767	-	NULL	HMMPfam_RhoGAP,HMMSmart_RhoGAP,HMMSmart_IPPc,HMMPfam_Exo_endo_phos,superfamily_Exo_endo_phos,superfamily_Rho_GAP	-	no_errors	Unknown	Unknown	Unknown	44	0	0	21	23	52.27	Somatic	1	19.6589	63	79	55.24
4	124579731	124579731	G	T	SNP	Epha10	ENSMUST00000106185	mouse	ensembl	58_37k	1	known	intronic	c.1492-66	e7-66	-	-	-	-	no_errors	Unknown	Unknown	Unknown	23	0	0	12	7	36.84	Somatic	0.997951	6.18832	0	0	0
4	124711566	124711566	G	T	SNP	Gnl2	NM_145552.2	mouse	genbank	58_37k	1	validated	missense	c.149	p.R50M	-	HMMPfam_NGP1NT	HMMPfam_MMR_HSR1,HMMPfam_NGP1NT,superfamily_SSF52540	-	no_errors	Unknown	Unknown	Unknown	16	0	0	10	6	37.5	Somatic	0.990946	4.69666	187	39	17.26
4	124796445	124796445	C	A	SNP	Zc3h12a	NM_153159.2	mouse	genbank	58_37k	-1	validated	3_prime_untranslated_region	c.*78	NULL	-	-	-	-	no_errors	Unknown	Unknown	Unknown	59	0	0	24	21	46.67	Somatic	1	20.6334	11	13	54.17
4	125371421	125371421	A	C	SNP	Grik3	NM_001081097.2	mouse	genbank	58_37k	1	reviewed	missense	c.2089	p.K697Q	-	HMMPfam_Lig_chan,HMMSmart_PBPe,superfamily_SSF53850	HMMPfam_Lig_chan,HMMSmart_PBPe,HMMPfam_ANF_receptor,HMMPfam_Lig_chan-Glu_bd,superfamily_SSF53822,superfamily_SSF53850	-	no_errors	Unknown	Unknown	Unknown	70	0	0	27	19	41.3	Somatic	1	19.8361	0	0	0
4	125812390	125812390	G	T	SNP	Stk40	NM_028800.3	mouse	genbank	58_37k	1	validated	intronic	c.478+19	e4+19	-	-	-	-	no_errors	Unknown	Unknown	Unknown	31	0	0	22	26	54.17	Somatic	1	16.6346	1	4	80
4	125915907	125915907	C	A	SNP	Mtap7d1	NM_144941.3	mouse	genbank	58_37k	-1	validated	intronic	c.746-31	e6-31	-	-	-	-	no_errors	Unknown	Unknown	Unknown	27	0	0	12	8	40	Somatic	0.999552	7.71091	8	8	50
4	126145662	126145662	C	A	SNP	Eif2c1	NM_153403.2	mouse	genbank	58_37k	-1	validated	nonsense	c.4	p.E2*	-	NULL	HMMPfam_PAZ,HMMPfam_Piwi,superfamily_Ribonuclease H-like,HMMPfam_DUF1785,superfamily_PAZ domain	-	no_errors	Unknown	Unknown	Unknown	105	0	0	69	64	48.12	Somatic	1	45.4064	20	15	42.86
4	126506208	126506208	G	C	SNP	AU040320	NM_001035525.1	mouse	genbank	58_37k	1	validated	intronic	c.1198+76	e6+76	-	-	-	-	no_errors	Unknown	Unknown	Unknown	22	0	0	18	15	44.12	Somatic	0.999905	9.26898	0	0	0
4	126600938	126600938	C	G	SNP	Zmym4	ENSMUST00000106108	mouse	ensembl	58_37k	-1	known	intronic	c.608-64	e4-64	-	-	-	-	no_errors	Unknown	Unknown	Unknown	30	0	0	13	7	35	Somatic	0.999087	6.99773	0	1	100
4	126779216	126779216	G	A	SNP	Zmym6	NM_177462.4	mouse	genbank	58_37k	1	provisional	splice_region	c.822+8	e6+8	-	-	-	-	no_errors	Unknown	Unknown	Unknown	65	0	0	40	41	50	Somatic	1	29.8923	0	0	0
4	126891899	126891899	G	T	SNP	Dlgap3	NM_198618.3	mouse	genbank	58_37k	1	provisional	intronic	c.1595-28	e5-28	-	-	-	-	no_errors	Unknown	Unknown	Unknown	35	0	0	12	17	58.62	Somatic	1	17.0271	0	0	0
4	127029357	127029357	C	G	SNP	Gjb4	NM_008127.3	mouse	genbank	58_37k	-1	validated	missense	c.34	p.G12R	-	HMMPfam_Connexin	HMMPfam_Connexin,HMMSmart_SM00037,PatternScan_CONNEXINS_1,PatternScan_CONNEXINS_2,HMMPfam_Connexin_CCC	-	no_errors	Unknown	Unknown	Unknown	111	0	0	61	54	46.96	Somatic	1	43.6524	20	24	54.55
4	127736462	127736462	G	T	SNP	Csmd2	ENSMUST00000097884	mouse	ensembl	58_37k	1	known	intronic	c.419+40	e2+40	-	-	-	-	no_errors	Unknown	Unknown	Unknown	40	0	0	20	22	52.38	Somatic	1	18.2208	0	0	0
4	128186324	128186324	C	G	SNP	Csmd2	ENSMUST00000097884	mouse	ensembl	58_37k	1	known	missense	c.6960	p.I2320M	-	HMMPfam_Sushi,HMMSmart_SM00032,superfamily_Complement control module/SCR domain	HMMPfam_Sushi,HMMSmart_SM00032,HMMPfam_CUB,HMMSmart_SM00042,superfamily_Spermadhesin CUB domain,PatternScan_GLYCOSYL_HYDROL_F10,superfamily_Complement control module/SCR domain	-	no_errors	Unknown	Unknown	Unknown	43	0	0	21	21	50	Somatic	1	17.9775	0	0	0
4	128200844	128200844	C	A	SNP	Csmd2	ENSMUST00000097884	mouse	ensembl	58_37k	1	known	intronic	c.8320+30	e53+30	-	-	-	-	no_errors	Unknown	Unknown	Unknown	48	0	0	18	30	62.5	Somatic	1	27.3868	0	0	0
4	128208049	128208049	C	A	SNP	Csmd2	ENSMUST00000097884	mouse	ensembl	58_37k	1	known	intronic	c.8321-3336	e54-3336	-	-	-	-	no_errors	Unknown	Unknown	Unknown	14	0	0	4	8	66.67	Somatic	0.999708	8.26941	0	0	0
4	128211469	128211469	G	T	SNP	Csmd2	ENSMUST00000097884	mouse	ensembl	58_37k	1	known	missense	c.8405	p.S2802I	-	HMMPfam_Sushi,HMMSmart_SM00032,superfamily_Complement control module/SCR domain	HMMPfam_Sushi,HMMSmart_SM00032,HMMPfam_CUB,HMMSmart_SM00042,superfamily_Spermadhesin CUB domain,PatternScan_GLYCOSYL_HYDROL_F10,superfamily_Complement control module/SCR domain	-	no_errors	Unknown	Unknown	Unknown	182	0	0	84	88	51.16	Somatic	1	77.5115	0	1	100
4	128238992	128238992	T	G	SNP	Csmd2	ENSMUST00000097884	mouse	ensembl	58_37k	1	known	intronic	c.10087-43	e66-43	-	-	-	-	no_errors	Unknown	Unknown	Unknown	44	0	0	54	9	14.29	Somatic	0.990159	4.61131	0	0	0
4	128293306	128293306	G	T	SNP	Tlr12	NM_205823.2	mouse	genbank	58_37k	-1	validated	silent	c.2394	p.P798	-	HMMPfam_TIR,HMMSmart_SM00255,superfamily_Toll/Interleukin receptor TIR domain	HMMPfam_TIR,HMMSmart_SM00255,superfamily_Toll/Interleukin receptor TIR domain,HMMPfam_LRR_1,HMMSmart_SM00369,superfamily_RNI-like,superfamily_L domain-like	-	no_errors	Unknown	Unknown	Unknown	58	0	0	27	26	49.06	Somatic	1	23.1117	0	0	0
4	128428968	128428968	G	T	SNP	Phc2	NM_018774.3	mouse	genbank	58_37k	1	provisional	3_prime_untranslated_region	c.*70	NULL	-	-	-	-	no_errors	Unknown	Unknown	Unknown	22	0	0	15	17	53.12	Somatic	0.999987	11.2973	213	203	48.68
4	128439020	128439020	C	A	SNP	A3galt2	NM_001009819.2	mouse	genbank	58_37k	1	validated	intronic	c.287+36	e3+36	-	-	-	-	no_errors	Unknown	Unknown	Unknown	129	0	0	67	53	44.17	Somatic	1	45.2542	3	0	0
4	128637020	128637020	G	A	SNP	Adc	NM_172875.2	mouse	genbank	58_37k	-1	provisional	splice_region	c.279+8	e2+8	-	-	-	-	no_errors	Unknown	Unknown	Unknown	13	0	0	4	11	73.33	Somatic	0.999926	9.93087	2	4	66.67
4	128756112	128756112	C	G	SNP	Rnf19b	ENSMUST00000030584	mouse	ensembl	58_37k	1	known	intronic	c.713-39	e6-39	-	-	-	-	no_errors	Unknown	Unknown	Unknown	125	0	0	122	8	6.15	Somatic	0.985727	4.25808	1	1	50
4	129149446	129149446	G	T	SNP	Bsdc1	NM_133889.2	mouse	genbank	58_37k	1	provisional	intronic	c.528+160	e6+160	-	-	-	-	no_errors	Unknown	Unknown	Unknown	18	0	0	17	6	26.09	Somatic	0.975555	3.68663	0	0	0
4	129296137	129296137	C	A	SNP	Iqcc	ENSMUST00000131559	mouse	ensembl	58_37k	-1	known	5_prime_untranslated_region	c.-129296137	NULL	-	-	-	-	no_coding_region	Unknown	Unknown	Unknown	27	0	0	12	20	62.5	Somatic	1	16.3398	6	14	70
4	129307621	129307621	C	G	SNP	Txlna	NM_001005506.2	mouse	genbank	58_37k	-1	provisional	missense	c.1186	p.E396Q	-	HMMPfam_Taxilin	HMMPfam_Taxilin	-	no_errors	Unknown	Unknown	Unknown	104	0	0	50	51	50.5	Somatic	1	43.9551	209	172	45.14
4	129691080	129691080	G	T	SNP	Bai2	NM_173071.2	mouse	genbank	58_37k	1	validated	missense	c.3127	p.V1043L	-	HMMPfam_7tm_2	HMMPfam_GPS,HMMSmart_SM00303,HMMPfam_7tm_2,HMMPfam_TSP_1,HMMSmart_SM00209,superfamily_TSP-1 type 1 repeat,HMMPfam_HRM,HMMSmart_SM00008	-	no_errors	Unknown	Unknown	Unknown	183	0	0	107	122	53.04	Somatic	1	90.2273	1	0	0
4	129694306	129694306	G	T	SNP	Bai2	NM_173071.2	mouse	genbank	58_37k	1	validated	missense	c.3435	p.M1145I	-	HMMPfam_7tm_2	HMMPfam_GPS,HMMSmart_SM00303,HMMPfam_7tm_2,HMMPfam_TSP_1,HMMSmart_SM00209,superfamily_TSP-1 type 1 repeat,HMMPfam_HRM,HMMSmart_SM00008	-	no_errors	Unknown	Unknown	Unknown	92	0	0	44	43	49.43	Somatic	1	37.4667	0	0	0
4	129694703	129694703	G	T	SNP	Bai2	NM_173071.2	mouse	genbank	58_37k	1	validated	intronic	c.3607-70	e24-70	-	-	-	-	no_errors	Unknown	Unknown	Unknown	20	0	0	17	16	48.48	Somatic	0.999916	9.40038	0	0	0
4	129767387	129767387	G	T	SNP	Col16a1	NM_028266.5	mouse	genbank	58_37k	1	validated	splice_region	c.3762+6	e59+6	-	-	-	-	no_errors	Unknown	Unknown	Unknown	121	0	0	86	61	41.5	Somatic	1	42.7759	0	4	100
4	129851231	129851231	G	T	SNP	Tinagl1	NM_023476.3	mouse	genbank	58_37k	-1	validated	nonsense	c.60	p.Y20*	-	HMMSmart_SO,PatternScan_SMB_1	PatternScan_THIOL_PROTEASE_HIS,HMMPfam_Peptidase_C1,HMMSmart_Pept_C1,HMMSmart_SO,PatternScan_SMB_1,PatternScan_LIPOCALIN,superfamily_SSF54001	-	no_errors	Unknown	Unknown	Unknown	57	0	0	45	42	48.28	Somatic	1	26.0988	1446	85	5.55
4	129942417	129942417	G	T	SNP	Serinc2	ENSMUST00000075677	mouse	ensembl	58_37k	-1	known	missense	c.97	p.R33S	-	HMMPfam_Serinc	HMMPfam_Serinc	-	no_errors	Unknown	Unknown	Unknown	36	0	0	21	22	51.16	Somatic	1	16.574	93	42	31.11
4	130162433	130162433	G	C	SNP	Nkain1	NM_025998.3	mouse	genbank	58_37k	1	validated	missense	c.216	p.W72C	-	HMMPfam_NKAIN	HMMPfam_NKAIN	-	no_errors	Unknown	Unknown	Unknown	135	0	0	94	72	43.37	Somatic	1	50.6408	70	58	45.31
4	130165776	130165776	G	T	SNP	Nkain1	NM_025998.3	mouse	genbank	58_37k	1	validated	missense	c.341	p.G114V	-	HMMPfam_NKAIN	HMMPfam_NKAIN	-	no_errors	Unknown	Unknown	Unknown	43	0	0	41	36	46.75	Somatic	1	19.6617	61	80	56.74
4	130482066	130482066	G	T	SNP	Laptm5	NM_010686.3	mouse	genbank	58_37k	1	validated	missense	c.134	p.R45L	-	HMMPfam_Mtp	HMMPfam_Mtp	-	no_errors	Unknown	Unknown	Unknown	35	0	0	26	19	42.22	Somatic	0.999997	12.8578	0	0	0
4	131043456	131043456	G	T	SNP	Gm831	XM_001477145.1	mouse	genbank	58_37k	1	model	intronic	c.73+27	e1+27	-	-	-	-	no_errors	Unknown	Unknown	Unknown	23	0	0	29	16	35.56	Somatic	0.999491	7.58246	0	0	0
4	131379649	131379649	T	G	SNP	Ptpru	NM_001083119.2	mouse	genbank	58_37k	-1	validated	intronic	c.205+98	e2+98	-	-	-	-	no_errors	Unknown	Unknown	Unknown	12	0	0	7	9	56.25	Somatic	0.998252	6.49673	0	0	0
4	131493194	131493194	T	G	SNP	Epb4.1	ENSMUST00000097859	mouse	ensembl	58_37k	-1	known	missense	c.1005	p.E335D	-	NULL	HMMPfam_SAB,HMMPfam_4_1_CTD,HMMPfam_FA,HMMPfam_FERM_C,superfamily_PH domain-like	-	no_errors	Unknown	Unknown	Unknown	88	0	0	60	35	36.84	Somatic	1	25.9065	10	3	23.08
4	131519909	131519910	-	A	INS	Epb4.1	NM_183428.3	mouse	genbank	58_37k	-1	validated	intronic	c.1885-25_1885-24	e13-24	-	-	-	-	no_errors	Unknown	Unknown	Unknown	51	0	0	36	5	12.2	Somatic	0.9758	3.7082	0	0	0
4	131669419	131669419	G	T	SNP	Oprd1	NM_013622.3	mouse	genbank	58_37k	-1	validated	3_prime_untranslated_region	c.*23	NULL	-	-	-	-	no_errors	Unknown	Unknown	Unknown	16	0	0	16	21	56.76	Somatic	0.999947	10.1186	0	0	0
4	131673149	131673149	G	A	SNP	Oprd1	NM_013622.3	mouse	genbank	58_37k	-1	validated	silent	c.462	p.V154	-	HMMPfam_7tm_1,superfamily_Family A G protein-coupled receptor-like	HMMPfam_7tm_1,PatternScan_G_PROTEIN_RECEP_F1_1,superfamily_Family A G protein-coupled receptor-like	-	no_errors	Unknown	Unknown	Unknown	40	0	0	46	6	11.54	Somatic	0.960063	3.1815	0	0	0
4	131914063	131914063	C	A	SNP	Phactr4	NM_175306.4	mouse	genbank	58_37k	-1	validated	3_prime_untranslated_region	c.*121	NULL	-	-	-	-	no_errors	Unknown	Unknown	Unknown	10	0	0	7	5	41.67	Somatic	0.970951	3.5403	10	42	80.77
4	131925636	131925636	C	T	SNP	Phactr4	NM_175306.4	mouse	genbank	58_37k	-1	validated	intronic	c.1582+13	e7+13	-	-	-	-	no_errors	Unknown	Unknown	Unknown	198	0	0	130	85	39.53	Somatic	1	63.6777	1	0	0
4	131925637	131925637	T	A	SNP	Phactr4	NM_175306.4	mouse	genbank	58_37k	-1	validated	intronic	c.1582+12	e7+12	-	-	-	-	no_errors	Unknown	Unknown	Unknown	199	0	0	131	85	39.35	Somatic	1	63.6257	1	0	0
4	131942946	131942946	C	A	SNP	Phactr4	NM_175306.4	mouse	genbank	58_37k	-1	validated	missense	c.51	p.M17I	-	NULL	HMMPfam_RPEL,HMMSmart_SM00707	-	no_errors	Unknown	Unknown	Unknown	81	0	0	56	53	48.62	Somatic	1	36.1459	42	10	19.23
4	132053944	132053944	A	C	SNP	Sesn2	NM_144907.1	mouse	genbank	58_37k	-1	provisional	missense	c.825	p.D275E	-	HMMPfam_PA26	HMMPfam_PA26,superfamily_AhpD-like	-	no_errors	Unknown	Unknown	Unknown	55	0	0	39	51	56.67	Somatic	1	31.8999	42	46	52.27
4	132619479	132619479	A	T	SNP	Ahdc1	NM_146155.3	mouse	genbank	58_37k	1	validated	silent	c.2115	p.A705	-	NULL	HMMPfam_AT_hook,HMMSmart_AT_hook	-	no_errors	Unknown	Unknown	Unknown	27	0	0	20	22	52.38	Somatic	0.999999	13.8576	10	5	33.33
4	132621335	132621335	G	A	SNP	Ahdc1	NM_146155.3	mouse	genbank	58_37k	1	validated	missense	c.3971	p.R1324K	-	NULL	HMMPfam_AT_hook,HMMSmart_AT_hook	-	no_errors	Unknown	Unknown	Unknown	79	0	0	61	56	47.86	Somatic	1	35.4755	20	21	51.22
4	132778203	132778203	G	A	SNP	Cd164l2	NM_027152.1	mouse	genbank	58_37k	1	validated	intronic	c.367+75	e4+75	-	-	-	-	no_errors	Unknown	Unknown	Unknown	13	0	0	5	5	50	Somatic	0.993038	4.98036	0	0	0
4	132878112	132878112	C	A	SNP	Wdtc1	NM_199306.4	mouse	genbank	58_37k	-1	validated	missense	c.107	p.R36L	-	HMMSmart_SM00320,superfamily_WD40 repeat-like	HMMSmart_SM00320,superfamily_WD40 repeat-like,HMMSmart_SM00028,HMMPfam_WD40,superfamily_TPR-like	-	no_errors	Unknown	Unknown	Unknown	9	0	0	10	9	47.37	Somatic	0.985213	4.34844	37	16	30.19
4	133145822	133145822	G	T	SNP	Gpn2	NM_133884.2	mouse	genbank	58_37k	1	validated	splice_region	c.860+10	e4+10	-	-	-	-	no_errors	Unknown	Unknown	Unknown	32	0	0	14	15	51.72	Somatic	0.999999	13.6194	0	0	0
4	133417345	133417345	G	T	SNP	Rps6ka1	NM_009097.4	mouse	genbank	58_37k	-1	validated	missense	c.1168	p.H390N	-	superfamily_Protein kinase-like (PK-like)	HMMSmart_SM00133,HMMSmart_SM00219,HMMSmart_SM00220,PatternScan_PROTEIN_KINASE_ST,superfamily_Protein kinase-like (PK-like),PatternScan_PROTEIN_KINASE_ATP,HMMPfam_Pkinase,HMMPfam_Pkinase_C	-	no_errors	Unknown	Unknown	Unknown	69	0	0	49	36	42.35	Somatic	1	25.1303	30	22	42.31
4	133611682	133611682	C	A	SNP	ENSMUSG00000049410	ENSMUST00000105884	mouse	ensembl	58_37k	1	known	missense	c.541	p.P181T	-	NULL	HMMPfam_zf-C2H2,PatternScan_ZINC_FINGER_C2H2_1,HMMSmart_SM00355,superfamily_C2H2 and C2HC zinc fingers	-	no_errors	Unknown	Unknown	Unknown	227	0	0	149	131	46.79	Somatic	1	93.895	0	0	0
4	133611927	133611927	C	T	SNP	ENSMUSG00000049410	ENSMUST00000105884	mouse	ensembl	58_37k	1	known	silent	c.786	p.T262	-	NULL	HMMPfam_zf-C2H2,PatternScan_ZINC_FINGER_C2H2_1,HMMSmart_SM00355,superfamily_C2H2 and C2HC zinc fingers	-	no_errors	Unknown	Unknown	Unknown	72	0	0	34	29	46.03	Somatic	1	26.0427	0	0	0
4	133638700	133638718	AGCTACTCCCTAGAAGTCT	-	DEL	Aim1l	ENSMUST00000137529	mouse	ensembl	58_37k	1	known	3_prime_untranslated_region	c.*133638700	NULL	-	-	-	-	no_coding_region	Unknown	Unknown	Unknown	NA	NA	NA	NA	NA	NA	Somatic	NA	NA	NA	NA	NA
4	133709833	133709833	T	G	SNP	Ccdc21	NM_144527.3	mouse	genbank	58_37k	-1	validated	missense	c.1043	p.K348T	-	NULL	NULL	-	no_errors	Unknown	Unknown	Unknown	24	0	0	19	6	24	Somatic	0.985208	4.19883	47	15	24.19
4	133758195	133758195	C	T	SNP	Gm7534	NM_001080712.1	mouse	genbank	58_37k	-1	provisional	missense	c.713	p.S238N	-	NULL	HMMPfam_Zona_pellucida,HMMSmart_ZP	-	no_errors	Unknown	Unknown	Unknown	341	0	0	330	97	22.66	Somatic	1	59.0731	0	0	0
4	133788077	133788077	A	C	SNP	Cnksr1	NM_001081047.1	mouse	genbank	58_37k	-1	provisional	missense	c.1160	p.L387R	-	superfamily_SSF50729	HMMSmart_PDZ,superfamily_PDZ,HMMPfam_SAM_1,HMMSmart_SAM,HMMPfam_PH,HMMSmart_PH,superfamily_SAM_homology,HMMPfam_CRIC_ras_sig,superfamily_SSF50729	-	no_errors	Unknown	Unknown	Unknown	127	0	0	78	41	34.45	Somatic	1	32.9257	0	0	0
4	133807820	133807820	G	T	SNP	Grrp1	ENSMUST00000060050	mouse	ensembl	58_37k	-1	known	nonsense	c.261	p.Y87*	-	NULL	NULL	-	no_errors	Unknown	Unknown	Unknown	46	1	2.13	21	22	50	Somatic	1	16.2909	0	0	0
4	134063973	134063973	C	A	SNP	Paqr7	NM_027995.2	mouse	genbank	58_37k	1	provisional	3_prime_untranslated_region	c.*187	NULL	-	-	-	-	no_errors	Unknown	Unknown	Unknown	51	0	0	19	25	56.82	Somatic	1	24.1511	5	3	37.5
4	134064757	134064757	G	T	SNP	2610002D18Rik	NM_001081099.1	mouse	genbank	58_37k	1	predicted	5_prime_flanking_region	c.-2250	NULL	-	-	-	-	no_errors	Unknown	Unknown	Unknown	10	0	0	5	4	44.44	Somatic	0.969587	3.49525	0	0	0
4	135333958	135333958	G	A	SNP	Myom3	ENSMUST00000074336	mouse	ensembl	58_37k	1	known	silent	c.1242	p.Q414	-	HMMPfam_fn3,HMMSmart_FN3,superfamily_FN_III-like	HMMSmart_IGc2,HMMSmart_IG,HMMPfam_fn3,HMMSmart_FN3,superfamily_FN_III-like,HMMPfam_I-set,HMMPfam_ig,superfamily_SSF48726	-	no_errors	Unknown	Unknown	Unknown	17	0	0	13	12	48	Somatic	0.999514	7.64779	0	0	0
4	135419520	135419520	A	T	SNP	Sfrs13a	ENSMUST00000129198	mouse	ensembl	58_37k	1	known	3_prime_untranslated_region	c.*135419520	NULL	-	-	-	-	no_coding_region	Unknown	Unknown	Unknown	87	1	1.14	50	39	43.33	Somatic	1	28.0978	3	4	57.14
4	135428181	135428181	C	T	SNP	Pnrc2	NM_026383.3	mouse	genbank	58_37k	-1	validated	nonsense	c.171	p.W57*	-	NULL	NULL	-	no_errors	Unknown	Unknown	Unknown	152	0	0	78	59	43.07	Somatic	1	51.0973	195	250	55.68
4	135605832	135605832	C	G	SNP	Rpl11	ENSMUST00000102536	mouse	ensembl	58_37k	-1	known	3_prime_untranslated_region	c.*70	NULL	-	-	-	-	no_errors	Unknown	Unknown	Unknown	25	0	0	11	16	57.14	Somatic	0.999999	13.596	30	67	69.07
4	135742907	135742907	G	T	SNP	E2f2	NM_177733.6	mouse	genbank	58_37k	1	validated	splice_site	c.1051+1	e6+1	-	-	-	-	no_errors	Unknown	Unknown	Unknown	17	0	0	12	12	50	Somatic	0.999649	7.97961	0	21	100
4	135797162	135797162	G	T	SNP	Asap3	NM_001008232.2	mouse	genbank	58_37k	1	validated	missense	c.2109	p.E703D	-	NULL	HMMPfam_ArfGap,HMMSmart_SM00105,superfamily_Pyk2-associated protein beta ARF-GAP domain,HMMPfam_PH,HMMSmart_SM00233,HMMPfam_Ank,HMMSmart_SM00248,superfamily_Ankyrin repeat,superfamily_PH domain-like	-	no_errors	Unknown	Unknown	Unknown	41	0	0	20	23	53.49	Somatic	1	19.1963	8	7	46.67
4	135999094	135999094	C	G	SNP	Htr1d	NM_008309.4	mouse	genbank	58_37k	1	validated	missense	c.718	p.Q240E	-	HMMPfam_7tm_1,superfamily_SSF81321	HMMPfam_7tm_1,PatternScan_G_PROTEIN_RECEP_F1_1,superfamily_SSF81321	-	no_errors	Unknown	Unknown	Unknown	63	0	0	39	34	46.58	Somatic	1	25.416	0	0	0
4	136214818	136214818	A	G	SNP	Ephb2	NM_010142.2	mouse	genbank	58_37k	-1	provisional	intronic	c.2502+32	e13+32	-	-	-	-	no_errors	Unknown	Unknown	Unknown	25	0	0	28	12	30	Somatic	0.998349	6.40499	0	0	0
4	136239931	136239931	C	A	SNP	Ephb2	NM_010142.2	mouse	genbank	58_37k	-1	provisional	missense	c.1332	p.Q444H	-	HMMPfam_fn3,HMMSmart_FN3,superfamily_FN_III-like	HMMPfam_Ephrin_lbd,HMMSmart_EPH_lbd,HMMPfam_Pkinase_Tyr,HMMSmart_TyrKc,PatternScan_RECEPTOR_TYR_KIN_V_1,PatternScan_RECEPTOR_TYR_KIN_V_2,HMMPfam_SAM_1,HMMSmart_SAM,HMMPfam_fn3,HMMSmart_FN3,PatternScan_PROTEIN_KINASE_TYR,superfamily_FN_III-like,superfamily	-	no_errors	Unknown	Unknown	Unknown	47	0	0	25	23	47.92	Somatic	1	18.8802	12	7	36.84
4	136959803	136959803	G	A	SNP	ENSMUSG00000078520	ENSMUST00000024200	mouse	ensembl	58_37k	-1	known	missense	c.538	p.P180S	-	HMMPfam_Trypsin,HMMSmart_Tryp_SPc,superfamily_Pept_Ser_Cys	HMMPfam_Trypsin,HMMSmart_Tryp_SPc,superfamily_Pept_Ser_Cys,PatternScan_TRYPSIN_HIS,PatternScan_TRYPSIN_SER	-	no_errors	Unknown	Unknown	Unknown	44	0	0	19	20	51.28	Somatic	1	18.3695	0	0	0
4	137068102	137068102	G	T	SNP	Hspg2	ENSMUST00000030547	mouse	ensembl	58_37k	1	known	missense	c.1295	p.G432V	-	HMMSmart_IGc2,HMMPfam_I-set,superfamily_SSF48726	HMMPfam_Laminin_B,HMMPfam_SEA,HMMSmart_SEA,HMMSmart_LamG,HMMPfam_Laminin_EGF,HMMSmart_EGF_Lam,PatternScan_EGF_LAM_1,HMMPfam_Ldl_recept_a,HMMSmart_LDLa,PatternScan_LDLRA_1,superfamily_LDL_rcpt_classA_cys-rich,HMMSmart_IGc2,HMMSmart_IG,HMMPfam_EGF,HMMSmart_	-	no_errors	Unknown	Unknown	Unknown	60	0	0	35	37	51.39	Somatic	1	27.8258	194	125	39.18
4	137068706	137068706	G	T	SNP	Hspg2	ENSMUST00000030547	mouse	ensembl	58_37k	1	known	intronic	c.1654+15	e13+15	-	-	-	-	no_errors	Unknown	Unknown	Unknown	33	0	0	22	16	42.11	Somatic	0.999992	11.6899	1	6	85.71
4	137108133	137108133	T	A	SNP	Hspg2	ENSMUST00000030547	mouse	ensembl	58_37k	1	known	missense	c.9419	p.I3140N	-	HMMSmart_IGc2,superfamily_ConA_like_lec_gl,HMMPfam_I-set,superfamily_SSF48726	HMMPfam_Laminin_B,HMMPfam_SEA,HMMSmart_SEA,HMMSmart_LamG,HMMPfam_Laminin_EGF,HMMSmart_EGF_Lam,PatternScan_EGF_LAM_1,HMMPfam_Ldl_recept_a,HMMSmart_LDLa,PatternScan_LDLRA_1,superfamily_LDL_rcpt_classA_cys-rich,HMMSmart_IGc2,HMMSmart_IG,HMMPfam_EGF,HMMSmart_	-	no_errors	Unknown	Unknown	Unknown	55	0	0	39	32	45.07	Somatic	1	21.9777	81	4	4.71
4	137109052	137109052	G	T	SNP	Hspg2	ENSMUST00000030547	mouse	ensembl	58_37k	1	known	intronic	c.9674-38	e73-38	-	-	-	-	no_errors	Unknown	Unknown	Unknown	19	0	0	14	16	53.33	Somatic	0.999954	10.0344	3	0	0
4	137109189	137109189	A	T	SNP	Hspg2	ENSMUST00000030547	mouse	ensembl	58_37k	1	known	missense	c.9773	p.Q3258L	-	HMMSmart_IGc2,superfamily_ConA_like_lec_gl,HMMPfam_I-set,superfamily_SSF48726	HMMPfam_Laminin_B,HMMPfam_SEA,HMMSmart_SEA,HMMSmart_LamG,HMMPfam_Laminin_EGF,HMMSmart_EGF_Lam,PatternScan_EGF_LAM_1,HMMPfam_Ldl_recept_a,HMMSmart_LDLa,PatternScan_LDLRA_1,superfamily_LDL_rcpt_classA_cys-rich,HMMSmart_IGc2,HMMSmart_IG,HMMPfam_EGF,HMMSmart_	-	no_errors	Unknown	Unknown	Unknown	39	0	0	18	27	60	Somatic	1	22.0696	136	110	44.72
4	137125449	137125449	C	G	SNP	Hspg2	ENSMUST00000030547	mouse	ensembl	58_37k	1	known	missense	c.12998	p.S4333C	-	HMMSmart_LamG,superfamily_ConA_like_lec_gl,HMMPfam_Laminin_G_2	HMMPfam_Laminin_B,HMMPfam_SEA,HMMSmart_SEA,HMMSmart_LamG,HMMPfam_Laminin_EGF,HMMSmart_EGF_Lam,PatternScan_EGF_LAM_1,HMMPfam_Ldl_recept_a,HMMSmart_LDLa,PatternScan_LDLRA_1,superfamily_LDL_rcpt_classA_cys-rich,HMMSmart_IGc2,HMMSmart_IG,HMMPfam_EGF,HMMSmart_	-	no_errors	Unknown	Unknown	Unknown	29	0	0	11	23	67.65	Somatic	1	19.6514	184	142	43.43
4	137150201	137150201	G	T	SNP	Usp48	NM_130879.2	mouse	genbank	58_37k	1	validated	5_prime_untranslated_region	c.-97	NULL	-	-	-	-	no_errors	Unknown	Unknown	Unknown	15	0	0	5	7	58.33	Somatic	0.999186	7.1505	11	7	38.89
4	137272011	137272011	G	T	SNP	Rap1gap	NM_001081155.1	mouse	genbank	58_37k	1	provisional	missense	c.599	p.R200L	-	superfamily_Rap/Ran-GAP (Pfam 02145)	HMMPfam_Rap_GAP,HMMPfam_GoLoco,HMMSmart_SM00390,superfamily_Rap/Ran-GAP (Pfam 02145)	-	no_errors	Unknown	Unknown	Unknown	139	0	0	85	82	49.1	Somatic	1	60.7317	101	85	45.45
4	137309925	137309925	G	C	SNP	Alpl	NM_007431.2	mouse	genbank	58_37k	-1	validated	missense	c.330	p.S110R	-	HMMPfam_Alk_phosphatase,HMMSmart_alkPPc,superfamily_Alkaline_phosphatase_core,PatternScan_ALKALINE_PHOSPHATASE	HMMPfam_Alk_phosphatase,HMMSmart_alkPPc,superfamily_Alkaline_phosphatase_core,PatternScan_ALKALINE_PHOSPHATASE	-	no_errors	Unknown	Unknown	Unknown	24	0	0	19	16	45.71	Somatic	0.999959	10.1091	2	0	0
4	138125331	138125331	C	G	SNP	Vwa5b1	ENSMUST00000030533	mouse	ensembl	58_37k	-1	known	missense	c.3299	p.S1100T	-	NULL	HMMPfam_VWA,HMMSmart_SM00327,superfamily_vWA-like	-	no_errors	Unknown	Unknown	Unknown	74	0	0	44	32	42.11	Somatic	1	25.2794	0	0	0
4	138144614	138144614	G	T	SNP	Vwa5b1	ENSMUST00000030533	mouse	ensembl	58_37k	-1	known	splice_region	c.1735-4	e12-4	-	-	-	-	no_errors	Unknown	Unknown	Unknown	14	0	0	11	12	52.17	Somatic	0.999223	7.25184	0	0	0
4	138160712	138160712	C	A	SNP	Vwa5b1	ENSMUST00000030533	mouse	ensembl	58_37k	-1	known	missense	c.908	p.R303L	-	NULL	HMMPfam_VWA,HMMSmart_SM00327,superfamily_vWA-like	-	no_errors	Unknown	Unknown	Unknown	86	0	0	46	43	48.31	Somatic	1	35.0722	0	0	0
4	138166563	138166563	T	A	SNP	Vwa5b1	ENSMUST00000030533	mouse	ensembl	58_37k	-1	known	intronic	c.283+77	e2+77	-	-	-	-	no_errors	Unknown	Unknown	Unknown	11	0	0	5	10	66.67	Somatic	0.999298	7.66497	0	0	0
4	138292001	138292001	G	T	SNP	Pla2g2c	NM_008868.3	mouse	genbank	58_37k	1	validated	splice_site	c.289+1	e3+1	-	-	-	-	no_errors	Unknown	Unknown	Unknown	81	0	0	50	54	51.92	Somatic	1	38.8854	0	0	0
4	138390713	138390713	C	A	SNP	Pla2g2a	ENSMUST00000077582	mouse	ensembl	58_37k	1	known	missense	c.347	p.A116D	-	HMMPfam_Phospholip_A2_1,HMMSmart_SM00085,PatternScan_PA2_ASP,superfamily_Phospholipase A2 PLA2	HMMPfam_Phospholip_A2_1,HMMSmart_SM00085,PatternScan_PA2_HIS,PatternScan_PA2_ASP,superfamily_Phospholipase A2 PLA2	-	no_errors	Unknown	Unknown	Unknown	39	0	0	18	35	66.04	Somatic	1	26.7599	0	0	0
4	138630018	138630018	A	T	SNP	Htr6	NM_021358.2	mouse	genbank	58_37k	-1	provisional	missense	c.659	p.V220E	-	HMMPfam_7tm_1,superfamily_Family A G protein-coupled receptor-like	HMMPfam_7tm_1,PatternScan_G_PROTEIN_RECEP_F1_1,superfamily_Family A G protein-coupled receptor-like	-	no_errors	Unknown	Unknown	Unknown	59	0	0	32	44	57.89	Somatic	1	32.8987	0	0	0
4	138731837	138731837	C	A	SNP	ENSMUSG00000073739	ENSMUST00000097827	mouse	ensembl	58_37k	-1	known	missense	c.6	p.L2F	-	NULL	NULL	-	no_errors	Unknown	Unknown	Unknown	18	0	0	17	9	34.62	Somatic	0.995227	5.34037	0	0	0
4	138949115	138949115	G	A	SNP	Ubr4	ENSMUST00000097822	mouse	ensembl	58_37k	1	known	intronic	c.893+42	e7+42	-	-	-	-	no_errors	Unknown	Unknown	Unknown	113	0	0	73	77	51.33	Somatic	1	53.9602	0	0	0
4	138955983	138955984	-	TTTTAAGGTCTCTGTTG	INS	Ubr4	ENSMUST00000097822	mouse	ensembl	58_37k	1	known	intronic	c.1632+134_1632+133	e13+134	-	-	-	-	no_errors	Unknown	Unknown	Unknown	NA	NA	NA	NA	NA	NA	Somatic	NA	NA	NA	NA	NA
4	139028656	139028656	G	T	SNP	Ubr4	ENSMUST00000097822	mouse	ensembl	58_37k	1	known	intronic	c.13928+79	e95+79	-	-	-	-	no_errors	Unknown	Unknown	Unknown	13	0	0	10	10	50	Somatic	0.997933	6.24893	4	2	33.33
4	139194513	139194513	G	A	SNP	Aldh4a1	NM_175438.4	mouse	genbank	58_37k	1	validated	intronic	c.863+36	e8+36	-	-	-	-	no_errors	Unknown	Unknown	Unknown	22	0	0	11	12	52.17	Somatic	0.999952	9.95444	0	0	0
4	139215530	139215530	T	A	SNP	Tas1r2	NM_031873.1	mouse	genbank	58_37k	1	provisional	intronic	c.493-109	e3-109	-	-	-	-	no_errors	Unknown	Unknown	Unknown	23	0	0	17	16	48.48	Somatic	0.99997	10.4132	0	0	0
4	139216318	139216318	G	T	SNP	Tas1r2	NM_031873.1	mouse	genbank	58_37k	1	provisional	missense	c.1172	p.S391I	-	HMMPfam_ANF_receptor,superfamily_Periplasmic binding protein-like I	HMMPfam_ANF_receptor,HMMPfam_NCD3G,HMMPfam_7tm_3,PatternScan_G_PROTEIN_RECEP_F3_2,superfamily_Periplasmic binding protein-like I,superfamily_TNF receptor-like	-	no_errors	Unknown	Unknown	Unknown	51	0	0	19	26	57.78	Somatic	1	24.9147	0	0	0
4	139523094	139523094	C	T	SNP	Klhdc7a	NM_173427.2	mouse	genbank	58_37k	-1	validated	silent	c.456	p.K152	-	NULL	HMMPfam_Kelch_1,HMMSmart_Kelch,superfamily_Gal_oxid_central	-	no_errors	Unknown	Unknown	Unknown	48	0	0	25	31	55.36	Somatic	1	24.3829	0	0	0
4	140108543	140108543	C	G	SNP	Arhgef10l	ENSMUST00000105799	mouse	ensembl	58_37k	-1	known	missense	c.2288	p.W763S	-	superfamily_PH domain-like	HMMPfam_RhoGEF,HMMSmart_SM00325,superfamily_DBL homology domain (DH-domain),superfamily_WD40 repeat-like,superfamily_PH domain-like	-	no_errors	Unknown	Unknown	Unknown	18	0	0	10	12	54.55	Somatic	0.999884	9.09546	25	38	60.32
4	140277202	140277202	A	G	SNP	Rcc2	NM_173867.5	mouse	genbank	58_37k	1	validated	3_prime_untranslated_region	c.*83	NULL	-	-	-	-	no_errors	Unknown	Unknown	Unknown	17	0	0	15	7	31.82	Somatic	0.988134	4.42232	753	368	32.74
4	140347533	140347533	G	C	SNP	Padi3	NM_011060.4	mouse	genbank	58_37k	-1	validated	intronic	c.1308-116	e12-116	-	-	-	-	no_errors	Unknown	Unknown	Unknown	29	0	0	24	18	42.86	Somatic	0.999987	11.2245	0	0	0
4	140370653	140370653	C	A	SNP	Padi1	NM_011059.2	mouse	genbank	58_37k	-1	provisional	silent	c.1872	p.L624	-	HMMPfam_PAD,superfamily_Pentein	superfamily_Cupredoxins,HMMPfam_PAD,HMMPfam_PAD_N,HMMPfam_PAD_M,superfamily_Peptidylarginine deiminase Pad4 middle domain,superfamily_Pentein	-	no_errors	Unknown	Unknown	Unknown	101	0	0	49	38	43.68	Somatic	1	34.0059	0	0	0
4	140370655	140370655	G	C	SNP	Padi1	NM_011059.2	mouse	genbank	58_37k	-1	provisional	missense	c.1870	p.L624V	-	HMMPfam_PAD,superfamily_Pentein	superfamily_Cupredoxins,HMMPfam_PAD,HMMPfam_PAD_N,HMMPfam_PAD_M,superfamily_Peptidylarginine deiminase Pad4 middle domain,superfamily_Pentein	-	no_errors	Unknown	Unknown	Unknown	104	0	0	49	38	43.68	Somatic	1	34.6472	0	0	0
4	140375789	140375789	G	T	SNP	Padi1	NM_011059.2	mouse	genbank	58_37k	-1	provisional	splice_region	c.1311-3	e12-3	-	-	-	-	no_errors	Unknown	Unknown	Unknown	36	0	0	22	25	53.19	Somatic	1	17.9423	0	0	0
4	140388496	140388496	G	T	SNP	Padi1	NM_011059.2	mouse	genbank	58_37k	-1	provisional	intronic	c.93-109	e2-109	-	-	-	-	no_errors	Unknown	Unknown	Unknown	9	0	0	5	7	58.33	Somatic	0.992311	5.12603	0	0	0
4	140462412	140462412	C	T	SNP	Padi2	NM_008812.2	mouse	genbank	58_37k	1	validated	missense	c.64	p.R22C	-	superfamily_Cupredoxin,HMMPfam_PAD_N	superfamily_Cupredoxin,HMMPfam_PAD,HMMPfam_PAD_N,HMMPfam_PAD_M,superfamily_PAD_central,superfamily_SSF55909	-	no_errors	Unknown	Unknown	Unknown	22	0	0	9	10	52.63	Somatic	0.999918	9.41242	0	0	0
4	140475088	140475088	G	T	SNP	Padi2	NM_008812.2	mouse	genbank	58_37k	1	validated	intronic	c.301-135	e3-135	-	-	-	-	no_errors	Unknown	Unknown	Unknown	17	0	0	18	20	52.63	Somatic	0.999923	9.5937	0	0	0
4	140646362	140646362	T	A	SNP	Spata21	NM_177867.3	mouse	genbank	58_37k	1	provisional	5_prime_untranslated_region	c.-16	NULL	-	-	-	-	no_errors	Unknown	Unknown	Unknown	41	0	0	41	32	43.84	Somatic	1	17.2165	0	0	0
4	140804859	140804859	G	T	SNP	Arhgef19	NM_172520.2	mouse	genbank	58_37k	1	provisional	intronic	c.1138-43	e6-43	-	-	-	-	no_errors	Unknown	Unknown	Unknown	70	0	0	44	50	53.19	Somatic	1	35.1826	0	0	0
4	141018458	141018458	C	A	SNP	Zbtb17	NM_009541.2	mouse	genbank	58_37k	1	validated	missense	c.214	p.Q72K	-	HMMSmart_BTB,superfamily_BTB/POZ_fold,HMMPfam_BTB	HMMSmart_BTB,HMMPfam_zf-C2H2,PatternScan_ZINC_FINGER_C2H2_1,superfamily_BTB/POZ_fold,HMMPfam_BTB,HMMSmart_ZnF_C2H2,superfamily_SSF57667	-	no_errors	Unknown	Unknown	Unknown	63	0	0	43	28	39.44	Somatic	1	20.4342	57	80	58.39
4	141311905	141311905	G	T	SNP	Agmat	NM_001081408.1	mouse	genbank	58_37k	1	provisional	missense	c.734	p.S245I	-	HMMPfam_Arginase,superfamily_SSF52768	HMMPfam_Arginase,PatternScan_ARGINASE_1,PatternScan_ARGINASE_2,PatternScan_ARGINASE_3,superfamily_SSF52768	-	no_errors	Unknown	Unknown	Unknown	11	0	0	4	6	60	Somatic	0.996298	5.72299	0	0	0
4	141377670	141377670	T	C	SNP	Cela2a	NM_007919.2	mouse	genbank	58_37k	-1	provisional	silent	c.309	p.Q103	-	HMMPfam_Trypsin,HMMSmart_SM00020,superfamily_Trypsin-like serine proteases	HMMPfam_Trypsin,HMMSmart_SM00020,superfamily_Trypsin-like serine proteases,PatternScan_TRYPSIN_HIS,PatternScan_TRYPSIN_SER	-	no_errors	Unknown	Unknown	Unknown	70	0	0	57	61	51.69	Somatic	1	36.0489	0	0	0
4	141464893	141464893	C	A	SNP	Fhad1	ENSMUST00000105780	mouse	ensembl	58_37k	-1	known	splice_site	c.3549+1	e26+1	-	-	-	-	no_errors	Unknown	Unknown	Unknown	50	0	0	29	32	52.46	Somatic	1	23.9572	0	0	0
4	141488710	141488710	C	A	SNP	Fhad1	ENSMUST00000105780	mouse	ensembl	58_37k	-1	known	nonsense	c.2197	p.E733*	-	NULL	HMMPfam_FHA,HMMSmart_SM00240,superfamily_SMAD/FHA domain	-	no_errors	Unknown	Unknown	Unknown	196	0	0	169	121	41.72	Somatic	1	73.7524	0	0	0
4	141528741	141528741	C	A	SNP	Fhad1	ENSMUST00000105780	mouse	ensembl	58_37k	-1	known	missense	c.1112	p.R371M	-	NULL	HMMPfam_FHA,HMMSmart_SM00240,superfamily_SMAD/FHA domain	-	no_errors	Unknown	Unknown	Unknown	78	0	0	34	47	58.02	Somatic	1	40.6458	0	0	0
4	141541342	141541342	C	A	SNP	Fhad1	ENSMUST00000105780	mouse	ensembl	58_37k	-1	known	intronic	c.651+49	e4+49	-	-	-	-	no_errors	Unknown	Unknown	Unknown	36	0	0	31	19	38	Somatic	0.999993	11.8501	0	0	0
4	141674174	141674174	G	A	SNP	9030409G11Rik	NM_144531.3	mouse	genbank	58_37k	-1	validated	missense	c.545	p.P182L	-	NULL	HMMPfam_SAM_1,HMMSmart_SM00454,superfamily_SAM/Pointed domain,HMMPfam_SAM_2	-	no_errors	Unknown	Unknown	Unknown	29	0	0	19	22	53.66	Somatic	1	14.9734	0	0	0
4	143162274	143162274	G	A	SNP	BC080695	NM_001007579.3	mouse	genbank	58_37k	1	predicted	splice_region	c.878+5	e2+5	-	-	-	-	no_errors	Unknown	Unknown	Unknown	1053	0	0	989	83	7.74	Somatic	1	47.8664	0	0	0
4	143205194	143205194	C	A	SNP	Gm8884	ENSMUST00000105773	mouse	ensembl	58_37k	1	known	missense	c.289	p.L97I	-	superfamily_SSF52047	superfamily_SSF52047	-	no_errors	Unknown	Unknown	Unknown	209	0	0	157	25	13.74	Somatic	1	18.0017	0	0	0
4	143316135	143316135	C	A	SNP	Gm8045	ENSMUST00000078695	mouse	ensembl	58_37k	1	known	missense	c.232	p.L78I	-	superfamily_SSF52047	superfamily_SSF52047	-	no_errors	Unknown	Unknown	Unknown	215	0	0	162	26	13.83	Somatic	1	18.6937	0	0	0
4	143316511	143316511	C	G	SNP	Gm8045	ENSMUST00000078695	mouse	ensembl	58_37k	1	known	splice_region	c.288-3	e2-3	-	-	-	-	no_errors	Unknown	Unknown	Unknown	197	0	0	189	29	13.3	Somatic	1	17.6727	0	0	0
4	143384278	143384278	A	T	SNP	Gm13023	NM_001007077.2	mouse	genbank	58_37k	1	validated	intronic	c.917+271	e3+271	-	-	-	-	no_errors	Unknown	Unknown	Unknown	83	0	0	59	14	19.18	Somatic	0.999975	10.5871	0	0	0
4	143484038	143484038	C	A	SNP	ENSMUSG00000066031	ENSMUST00000084194	mouse	ensembl	58_37k	1	known	intronic	c.1497-22572	e5-22572	-	-	-	-	no_errors	Unknown	Unknown	Unknown	38	0	0	23	13	36.11	Somatic	0.999971	10.4653	0	0	0
4	143485372	143485372	G	T	SNP	ENSMUSG00000078512	ENSMUST00000081645	mouse	ensembl	58_37k	-1	known	missense	c.1315	p.L439I	-	NULL	superfamily_SSF52047	-	no_errors	Unknown	Unknown	Unknown	383	0	0	269	20	6.9	Somatic	0.999999	13.4353	0	0	0
4	143485735	143485735	G	T	SNP	ENSMUSG00000078512	ENSMUST00000081645	mouse	ensembl	58_37k	-1	known	missense	c.952	p.Q318K	-	superfamily_SSF52047	superfamily_SSF52047	-	no_errors	Unknown	Unknown	Unknown	195	0	0	119	54	31.21	Somatic	1	44.1016	0	0	0
4	143486706	143486706	G	C	SNP	ENSMUSG00000078512	ENSMUST00000081645	mouse	ensembl	58_37k	-1	known	missense	c.800	p.S267C	-	superfamily_SSF52047	superfamily_SSF52047	-	no_errors	Unknown	Unknown	Unknown	657	0	0	473	71	13.03	Somatic	1	52.334	0	0	0
4	143540703	143540703	C	A	SNP	ENSMUSG00000078511	ENSMUST00000105766	mouse	ensembl	58_37k	-1	known	nonsense	c.208	p.G70*	-	superfamily_SSF52047	superfamily_SSF52047	-	no_errors	Unknown	Unknown	Unknown	118	0	0	57	57	50	Somatic	1	49.1469	0	0	0
4	143752518	143752518	T	C	SNP	Oog3	NM_201258.2	mouse	genbank	58_37k	-1	validated	5_prime_untranslated_region	c.-2223	NULL	-	-	-	-	no_errors	Unknown	Unknown	Unknown	52	0	0	35	22	38.6	Somatic	1	16.2836	0	0	0
4	143963150	143963150	G	A	SNP	ENSMUSG00000073721	ENSMUST00000121109	mouse	ensembl	58_37k	-1	known	missense	c.947	p.P316L	-	superfamily_SSF52047	superfamily_SSF52047	-	no_errors	Unknown	Unknown	Unknown	33	0	0	16	19	54.29	Somatic	1	15.8199	0	0	0
4	143966597	143966597	A	T	SNP	ENSMUSG00000073721	ENSMUST00000121109	mouse	ensembl	58_37k	-1	known	silent	c.861	p.L287	-	superfamily_SSF52047	superfamily_SSF52047	-	no_errors	Unknown	Unknown	Unknown	15	0	0	13	6	31.58	Somatic	0.979027	3.84378	0	0	0
4	143984964	143984964	T	A	SNP	Pramef12	NM_029948.2	mouse	genbank	58_37k	-1	provisional	missense	c.392	p.K131M	-	NULL	HMMPfam_LRR_1,PatternScan_SOMATOTROPIN_2,superfamily_SSF52047	-	no_errors	Unknown	Unknown	Unknown	135	0	0	128	14	9.86	Somatic	0.999764	8.35198	0	0	0
4	143995126	143995126	C	A	SNP	D530049N12Rik	XM_001476737.1	mouse	genbank	58_37k	1	model	5_prime_untranslated_region	c.-54	NULL	-	-	-	-	no_errors	Unknown	Unknown	Unknown	17	0	0	3	5	62.5	Somatic	0.999123	7.0467	0	0	0
4	144113569	144113569	T	C	SNP	Aadacl4	ENSMUST00000030328	mouse	ensembl	58_37k	1	known	missense	c.409	p.F137L	-	HMMPfam_Abhydrolase_3,superfamily_alpha/beta-Hydrolases	HMMPfam_Abhydrolase_3,superfamily_alpha/beta-Hydrolases	-	no_errors	Unknown	Unknown	Unknown	343	0	0	359	11	2.97	Somatic	0.970974	3.84836	0	0	0
4	144209680	144209680	T	G	SNP	Gm13177	NM_001081248.1	mouse	genbank	58_37k	1	inferred	intronic	c.449+60	e3+60	-	-	-	-	no_errors	Unknown	Unknown	Unknown	40	0	0	12	13	52	Somatic	1	14.8155	0	0	0
4	144293969	144293969	G	C	SNP	ENSMUSG00000041735	ENSMUST00000036876	mouse	ensembl	58_37k	-1	known	intronic	c.453-101	e4-101	-	-	-	-	no_errors	Unknown	Unknown	Unknown	34	0	0	12	20	62.5	Somatic	1	18.9733	0	0	0
4	144369522	144369522	C	A	SNP	ENSMUSG00000078504	ENSMUST00000105746	mouse	ensembl	58_37k	-1	known	intronic	c.404+97	e3+97	-	-	-	-	no_errors	Unknown	Unknown	Unknown	47	0	0	26	23	46.94	Somatic	1	18.5128	0	0	0
4	145733624	145733624	G	T	SNP	1700029I01Rik	ENSMUST00000105733	mouse	ensembl	58_37k	-1	known	silent	c.42	p.T14	-	HMMPfam_KRAB,HMMSmart_KRAB,superfamily_Krueppel-associated_box	HMMPfam_KRAB,HMMSmart_KRAB,superfamily_Krueppel-associated_box,HMMPfam_zf-C2H2,PatternScan_ZINC_FINGER_C2H2_1,HMMSmart_ZnF_C2H2,superfamily_SSF57667	-	no_errors	Unknown	Unknown	Unknown	88	0	0	65	11	14.47	Somatic	0.999677	8.0361	235	16	6.35
4	146085348	146085348	C	T	SNP	Gm13051	NM_001037926.2	mouse	genbank	58_37k	1	validated	intronic	c.30+38	e1+38	-	-	-	-	no_errors	Unknown	Unknown	Unknown	42	0	0	36	8	18.18	Somatic	0.995183	5.3308	0	0	0
4	146992672	146992672	C	T	SNP	2610305D13Rik	ENSMUST00000037565	mouse	ensembl	58_37k	-1	known	intronic	c.1-65	e1-65	-	-	-	-	no_errors	Unknown	Unknown	Unknown	320	0	0	150	10	6.25	Somatic	0.99962	7.98434	0	0	0
4	147260646	147260647	-	CCTCTGCTCGGGAGTCACCAT	INS	Mfn2	NM_133201.2	mouse	genbank	58_37k	-1	validated	intronic	c.817-114_817-113	e7-113	-	-	-	-	no_errors	Unknown	Unknown	Unknown	NA	NA	NA	NA	NA	NA	Somatic	NA	NA	NA	NA	NA
4	147302142	147302142	C	A	SNP	Plod1	NM_011122.3	mouse	genbank	58_37k	-1	validated	intronic	c.646+425	e6+425	-	-	-	-	no_errors	Unknown	Unknown	Unknown	54	0	0	32	41	56.16	Somatic	1	29.2952	2	3	60
4	147361105	147361105	A	T	SNP	Nppb	NM_008726.4	mouse	genbank	58_37k	1	validated	3_prime_untranslated_region	c.*18	NULL	-	-	-	-	no_errors	Unknown	Unknown	Unknown	183	0	0	123	115	48.32	Somatic	1	80.1904	13	12	48
4	147517751	147517751	A	C	SNP	Mad2l2	NM_027985.2	mouse	genbank	58_37k	1	validated	missense	c.332	p.N111T	-	HMMPfam_HORMA,superfamily_The spindle assembly checkpoint protein mad2	HMMPfam_HORMA,superfamily_The spindle assembly checkpoint protein mad2	-	no_errors	Unknown	Unknown	Unknown	29	0	0	15	22	59.46	Somatic	1	16.7382	84	92	52.27
4	147837934	147837934	G	T	SNP	Mtor	NM_020009.2	mouse	genbank	58_37k	1	validated	splice_region	c.1541+5	e9+5	-	-	-	-	no_errors	Unknown	Unknown	Unknown	7	0	0	4	4	50	Somatic	0.948589	3.0832	0	14	100
4	147912921	147912921	G	T	SNP	Mtor	NM_020009.2	mouse	genbank	58_37k	1	validated	missense	c.6118	p.G2040W	-	HMMPfam_Rapamycin_bind,superfamily_FRAP_FKBP12_bind,superfamily_ARM-type_fold	HMMPfam_PI3_PI4_kinase,HMMSmart_PI3Kc,HMMPfam_FAT,HMMPfam_FATC,HMMPfam_Rapamycin_bind,superfamily_FRAP_FKBP12_bind,superfamily_Kinase_like,superfamily_ARM-type_fold,PatternScan_PI3_4_KINASE_1,PatternScan_PI3_4_KINASE_2,superfamily_SSF48452	-	no_errors	Unknown	Unknown	Unknown	32	0	0	15	22	59.46	Somatic	1	17.8916	77	14	15.22
4	148303407	148303407	G	T	SNP	Casz1	NM_027195.2	mouse	genbank	58_37k	1	validated	missense	c.318	p.L106F	-	NULL	PatternScan_ZINC_FINGER_C2H2_1,HMMSmart_ZnF_C2H2	-	no_errors	Unknown	Unknown	Unknown	17	0	0	5	6	54.55	Somatic	0.998877	6.79828	0	0	0
4	148312685	148312685	A	C	SNP	Casz1	NM_027195.2	mouse	genbank	58_37k	1	validated	missense	c.1937	p.K646T	-	NULL	PatternScan_ZINC_FINGER_C2H2_1,HMMSmart_ZnF_C2H2	-	no_errors	Unknown	Unknown	Unknown	82	0	0	73	9	10.98	Somatic	0.996582	5.67563	0	0	0
4	148320392	148320392	C	T	SNP	Casz1	ENSMUST00000122222	mouse	ensembl	58_37k	1	known	intronic	c.3696+62	e14+62	-	-	-	-	no_errors	Unknown	Unknown	Unknown	10	0	0	7	6	46.15	Somatic	0.983139	4.12827	0	0	0
4	148415753	148415753	C	A	SNP	Pex14	NM_019781.2	mouse	genbank	58_37k	-1	provisional	intronic	c.169+77	e3+77	-	-	-	-	no_errors	Unknown	Unknown	Unknown	37	0	0	11	17	60.71	Somatic	1	18.2208	0	0	0
4	148563883	148563883	T	G	SNP	Kif1b	NM_207682.2	mouse	genbank	58_37k	-1	validated	missense	c.4177	p.T1393P	-	NULL	HMMPfam_FHA,HMMSmart_SM00240,HMMPfam_Kinesin,HMMSmart_SM00129,HMMPfam_PH,HMMSmart_SM00233,superfamily_SMAD/FHA domain,PatternScan_KINESIN_MOTOR_DOMAIN1,superfamily_PH domain-like,superfamily_P-loop containing nucleoside triphosphate hydrolases	-	no_errors	Unknown	Unknown	Unknown	103	0	0	74	50	40.32	Somatic	1	35.0359	37	43	53.75
4	148637582	148637582	C	A	SNP	Kif1b	NM_207682.2	mouse	genbank	58_37k	-1	validated	intronic	c.940+142	e9+142	-	-	-	-	no_errors	Unknown	Unknown	Unknown	13	0	0	13	13	50	Somatic	0.998596	6.67157	2	2	50
4	148703647	148703647	C	T	SNP	Ube4b	ENSMUST00000155968	mouse	ensembl	58_37k	-1	known	5_prime_untranslated_region	c.-148703647	NULL	-	-	-	-	no_coding_region	Unknown	Unknown	Unknown	11	0	0	7	7	50	Somatic	0.99283	5.00922	129	83	38.79
4	149514951	149514951	G	T	SNP	Slc2a5	NM_019741.3	mouse	genbank	58_37k	1	provisional	silent	c.1077	p.T359	-	HMMPfam_Sugar_tr,superfamily_MFS_gen_substrate_transporter	HMMPfam_Sugar_tr,PatternScan_SUGAR_TRANSPORT_1,PatternScan_SUGAR_TRANSPORT_2,superfamily_MFS_gen_substrate_transporter	-	no_errors	Unknown	Unknown	Unknown	62	0	0	29	34	53.97	Somatic	1	29.062	0	0	0
4	150012877	150012877	C	G	SNP	Slc45a1	NM_173774.3	mouse	genbank	58_37k	-1	validated	intronic	c.716-58	e4-58	-	-	-	-	no_errors	Unknown	Unknown	Unknown	32	0	0	16	16	50	Somatic	0.999999	13.4871	0	0	0
4	150017530	150017530	G	T	SNP	Slc45a1	NM_173774.3	mouse	genbank	58_37k	-1	validated	intronic	c.398-40	e2-40	-	-	-	-	no_errors	Unknown	Unknown	Unknown	35	0	0	29	32	52.46	Somatic	1	18.5454	0	0	0
4	150458814	150458814	G	T	SNP	Camta1	NM_001081557.2	mouse	genbank	58_37k	-1	validated	silent	c.3522	p.A1174	-	superfamily_Ankyrin repeat	HMMPfam_IQ,HMMPfam_Ank,superfamily_Ankyrin repeat,HMMPfam_TIG,HMMPfam_CG-1,superfamily_E set domains,superfamily_P-loop containing nucleoside triphosphate hydrolases	-	no_errors	Unknown	Unknown	Unknown	44	0	0	9	19	67.86	Somatic	1	23.5256	0	0	0
4	151406571	151406571	G	T	SNP	Tas1r1	NM_031867.2	mouse	genbank	58_37k	-1	validated	silent	c.714	p.I238	-	HMMPfam_ANF_receptor,superfamily_SSF53822	HMMPfam_ANF_receptor,HMMPfam_NCD3G,HMMPfam_7tm_3,PatternScan_G_PROTEIN_RECEP_F3_2,PatternScan_G_PROTEIN_RECEP_F3_3,superfamily_SSF53822	-	no_errors	Unknown	Unknown	Unknown	22	0	0	18	10	35.71	Somatic	0.998572	6.54983	0	0	0
4	151482023	151482023	G	T	SNP	Plekhg5	ENSMUST00000140085	mouse	ensembl	58_37k	1	known	3_prime_untranslated_region	c.*151482023	NULL	-	-	-	-	no_coding_region	Unknown	Unknown	Unknown	55	0	0	16	31	65.96	Somatic	1	31.9487	1	1	50
4	151507021	151507021	G	T	SNP	Espn	NM_207687.2	mouse	genbank	58_37k	-1	validated	intronic	c.1506+12	e8+12	-	-	-	-	no_errors	Unknown	Unknown	Unknown	121	0	0	109	89	44.95	Somatic	1	51.4017	0	0	0
4	151580984	151580984	G	T	SNP	Acot7	NM_133348.2	mouse	genbank	58_37k	1	validated	missense	c.159	p.Q53H	-	HMMPfam_4HBT,superfamily_SSF54637	HMMPfam_4HBT,superfamily_SSF54637	-	no_errors	Unknown	Unknown	Unknown	21	0	0	12	6	33.33	Somatic	0.993789	5.07529	381	278	42.12
4	151611861	151611861	G	A	SNP	Acot7	NM_133348.2	mouse	genbank	58_37k	1	validated	missense	c.602	p.G201D	-	HMMPfam_4HBT,superfamily_SSF54637	HMMPfam_4HBT,superfamily_SSF54637	-	no_errors	Unknown	Unknown	Unknown	71	0	0	42	33	44	Somatic	1	25.8687	449	323	41.84
4	151654219	151654219	G	T	SNP	Gpr153	NM_178406.2	mouse	genbank	58_37k	1	provisional	missense	c.622	p.D208Y	-	HMMPfam_7tm_1,superfamily_Family A G protein-coupled receptor-like	HMMPfam_7tm_1,superfamily_Family A G protein-coupled receptor-like	-	no_errors	Unknown	Unknown	Unknown	66	0	0	33	34	50.75	Somatic	1	28.5066	1	0	0
4	151661281	151661281	G	T	SNP	Hes3	NM_008237.4	mouse	genbank	58_37k	-1	provisional	missense	c.244	p.P82T	-	NULL	HMMPfam_HLH,HMMSmart_HLH,superfamily_HLH_basic	-	no_errors	Unknown	Unknown	Unknown	23	0	0	4	7	63.64	Somatic	0.999947	9.84583	0	0	0
4	151700041	151700041	G	T	SNP	Rpl22	NM_009079.2	mouse	genbank	58_37k	1	provisional	intronic	c.12+37	e1+37	-	-	-	-	no_errors	Unknown	Unknown	Unknown	10	0	0	4	4	50	Somatic	0.978907	3.88903	3	4	57.14
4	151758550	151758550	G	A	SNP	Chd5	NM_001081376.1	mouse	genbank	58_37k	1	validated	intronic	c.5377-44	e38-44	-	-	-	-	no_errors	Unknown	Unknown	Unknown	17	0	0	2	7	77.78	Somatic	0.999961	10.2066	1	0	0
4	151870666	151870666	G	T	SNP	Nphp4	NM_153424.2	mouse	genbank	58_37k	1	validated	intronic	c.289-92	e3-92	-	-	-	-	no_errors	Unknown	Unknown	Unknown	30	0	0	12	9	42.86	Somatic	0.999891	9.12338	0	0	0
4	151934332	151934332	G	T	SNP	Nphp4	NM_153424.2	mouse	genbank	58_37k	1	validated	intronic	c.3556-41	e25-41	-	-	-	-	no_errors	Unknown	Unknown	Unknown	31	0	0	17	30	63.83	Somatic	1	20.9018	0	1	100
4	153413638	153413638	G	A	SNP	Ccdc27	NM_001033455.2	mouse	genbank	58_37k	-1	provisional	silent	c.546	p.P182	-	NULL	NULL	-	no_errors	Unknown	Unknown	Unknown	63	0	0	45	32	41.56	Somatic	1	22.3534	0	0	0
4	153435593	153435593	G	T	SNP	Trp73	NM_011642.3	mouse	genbank	58_37k	-1	reviewed	missense	c.1344	p.N448K	-	NULL	HMMSmart_SM00454,PatternScan_P53,superfamily_p53-like transcription factors,HMMPfam_P53_tetramer,superfamily_p53 tetramerization domain,superfamily_SAM/Pointed domain,HMMPfam_SAM_2,HMMPfam_P53	-	no_errors	Unknown	Unknown	Unknown	68	0	0	35	34	49.28	Somatic	1	28.2607	0	0	0
4	153436002	153436002	C	A	SNP	Trp73	NM_011642.3	mouse	genbank	58_37k	-1	reviewed	intronic	c.1327+60	e10+60	-	-	-	-	no_errors	Unknown	Unknown	Unknown	14	0	0	6	4	40	Somatic	0.980909	3.94265	0	0	0
4	153437900	153437900	G	T	SNP	Trp73	NM_011642.3	mouse	genbank	58_37k	-1	reviewed	intronic	c.1050+94	e8+94	-	-	-	-	no_errors	Unknown	Unknown	Unknown	19	0	0	5	11	68.75	Somatic	0.999991	11.6587	0	0	0
4	153441124	153441124	G	T	SNP	Trp73	NM_011642.3	mouse	genbank	58_37k	-1	reviewed	missense	c.703	p.P235T	-	superfamily_p53-like transcription factors,HMMPfam_P53	HMMSmart_SM00454,PatternScan_P53,superfamily_p53-like transcription factors,HMMPfam_P53_tetramer,superfamily_p53 tetramerization domain,superfamily_SAM/Pointed domain,HMMPfam_SAM_2,HMMPfam_P53	-	no_errors	Unknown	Unknown	Unknown	18	0	0	9	7	43.75	Somatic	0.997849	6.14136	0	0	0
4	153626627	153626627	C	A	SNP	Megf6	ENSMUST00000030897	mouse	ensembl	58_37k	1	known	nonsense	c.1077	p.C359*	-	HMMSmart_SM00179,HMMPfam_EGF,HMMSmart_SM00181,PatternScan_EGF_2,superfamily_EGF/Laminin	PatternScan_ASX_HYDROXYL,HMMSmart_SM00179,HMMPfam_Laminin_EGF,HMMSmart_SM00180,HMMPfam_EGF,HMMSmart_SM00181,superfamily_Concanavalin A-like lectins/glucanases,HMMPfam_EMI,PatternScan_EGF_1,PatternScan_EGF_2,HMMPfam_EGF_CA,HMMPfam_EGF_2,PatternScan_EGF_CA,	-	no_errors	Unknown	Unknown	Unknown	56	0	0	41	23	35.94	Somatic	1	16.2772	0	0	0
4	153637653	153637653	C	G	SNP	Megf6	ENSMUST00000030897	mouse	ensembl	58_37k	1	known	intronic	c.2581+23	e20+23	-	-	-	-	no_errors	Unknown	Unknown	Unknown	86	0	0	44	34	43.59	Somatic	1	29.4153	0	0	0
4	153656048	153656048	G	A	SNP	Arhgef16	ENSMUST00000030898	mouse	ensembl	58_37k	-1	known	intronic	c.1393-23	e9-23	-	-	-	-	no_errors	Unknown	Unknown	Unknown	101	0	0	38	52	57.78	Somatic	1	49.5227	0	0	0
4	153694797	153694797	A	C	SNP	Prdm16	ENSMUST00000141164	mouse	ensembl	58_37k	-1	known	5_prime_untranslated_region	c.-153694797	NULL	-	-	-	-	no_coding_region	Unknown	Unknown	Unknown	47	0	0	21	19	47.5	Somatic	1	17.5149	0	0	0
4	153720382	153720382	G	T	SNP	Prdm16	NM_027504.3	mouse	genbank	58_37k	-1	validated	intronic	c.888-131	e7-131	-	-	-	-	no_errors	Unknown	Unknown	Unknown	37	0	0	12	11	47.83	Somatic	0.999995	12.2921	0	0	0
4	154041182	154041182	C	A	SNP	Actrt2	NM_028513.3	mouse	genbank	58_37k	-1	validated	missense	c.605	p.R202L	-	HMMPfam_Actin,HMMSmart_SM00268,superfamily_Actin-like ATPase domain	HMMPfam_Actin,HMMSmart_SM00268,PatternScan_ACTINS_ACT_LIKE,superfamily_Actin-like ATPase domain	-	no_errors	Unknown	Unknown	Unknown	44	0	0	26	34	56.67	Somatic	1	24.2296	0	0	0
4	154239768	154239768	A	G	SNP	Ttc34	NM_172878.3	mouse	genbank	58_37k	1	validated	missense	c.1541	p.E514G	-	NULL	HMMPfam_TPR_1,HMMSmart_TPR,superfamily_SSF48452	-	no_errors	Unknown	Unknown	Unknown	29	0	0	19	12	38.71	Somatic	0.999882	9.0423	0	0	0
4	154245816	154245816	G	C	SNP	Mmel1	NM_013783.2	mouse	genbank	58_37k	1	validated	missense	c.55	p.G19R	-	NULL	HMMPfam_Peptidase_M13_N,HMMPfam_Peptidase_M13,superfamily_Metalloproteases ("zincins") catalytic domain	-	no_errors	Unknown	Unknown	Unknown	50	0	0	44	41	48.24	Somatic	1	23.5189	0	0	0
4	154268234	154268234	G	T	SNP	Mmel1	NM_013783.2	mouse	genbank	58_37k	1	validated	silent	c.2013	p.V671	-	HMMPfam_Peptidase_M13,superfamily_Metalloproteases ("zincins") catalytic domain	HMMPfam_Peptidase_M13_N,HMMPfam_Peptidase_M13,superfamily_Metalloproteases ("zincins") catalytic domain	-	no_errors	Unknown	Unknown	Unknown	41	0	0	23	20	46.51	Somatic	1	15.9928	0	0	0
4	154449597	154449597	C	T	SNP	Rer1	NM_026395.1	mouse	genbank	58_37k	-1	provisional	intronic	c.501+101	e5+101	-	-	-	-	no_errors	Unknown	Unknown	Unknown	34	0	0	8	14	63.64	Somatic	1	16.7285	2	0	0
4	154625055	154625055	G	A	SNP	2610002J02Rik	ENSMUST00000143709	mouse	ensembl	58_37k	1	known	nonsense	c.318	p.W106*	-	NULL	NULL	-	pseudogene:no_stop_codon:bad_bp_length_for_coding_region	Unknown	Unknown	Unknown	85	0	0	58	47	44.76	Somatic	1	33.2334	114	156	57.56
4	154843596	154843596	A	T	SNP	Tmem52	ENSMUST00000023920	mouse	ensembl	58_37k	1	known	missense	c.136	p.S46C	-	NULL	NULL	-	no_errors	Unknown	Unknown	Unknown	55	0	0	31	34	52.31	Somatic	1	25.9908	0	0	0
4	155213735	155213735	C	T	SNP	Dvl1	NM_010091.3	mouse	genbank	58_37k	1	validated	5_prime_flanking_region	c.-8109	NULL	-	-	-	-	no_errors	Unknown	Unknown	Unknown	37	0	0	16	15	48.39	Somatic	0.999999	14.037	0	0	0
4	155215635	155215635	G	T	SNP	Mxra8	NM_024263.4	mouse	genbank	58_37k	1	validated	missense	c.455	p.R152L	-	HMMSmart_IG,HMMPfam_V-set	HMMSmart_IG,HMMPfam_V-set,superfamily_SSF48726	-	no_errors	Unknown	Unknown	Unknown	61	0	0	37	30	44.78	Somatic	1	23.0095	44	24	35.29
4	155243663	155243663	C	A	SNP	Cpsf3l	ENSMUST00000030901	mouse	ensembl	58_37k	1	known	5_prime_untranslated_region	c.-139	NULL	-	-	-	-	no_errors	Unknown	Unknown	Unknown	11	0	0	6	7	53.85	Somatic	0.995003	5.40433	2	0	0
4	155273596	155273596	G	A	SNP	Acap3	NM_207223.1	mouse	genbank	58_37k	1	provisional	missense	c.409	p.V137M	-	NULL	HMMPfam_ArfGap,HMMSmart_ArfGap,superfamily_ArfGAP,HMMPfam_PH,HMMSmart_PH,HMMPfam_Ank,HMMSmart_ANK,superfamily_ANK,superfamily_SSF50729	-	no_errors	Unknown	Unknown	Unknown	56	0	0	25	30	54.55	Somatic	1	26.3132	98	71	42.01
4	155274336	155274336	G	T	SNP	Acap3	NM_207223.1	mouse	genbank	58_37k	1	provisional	intronic	c.663+43	e8+43	-	-	-	-	no_errors	Unknown	Unknown	Unknown	33	0	0	23	27	54	Somatic	1	17.5276	2	2	50
[truncated: 4,657 more rows]

## Sheet: Predicted Db Binding Affinity
id	wt_peptide	mut_peptide	wt_ann_score	wt_netchop_left_score	wt_netchop_right_score	wt_netmhcpan_score	wt_pssm_score	wt_smm_score	wt_smmpmbec_score	mut_ann_score	mut_netchop_left_score	mut_netchop_right_score	mut_netmhcpan_score	mut_pssm_score	mut_smm_score	mut_smmpmbec_score	wt_mean_aff	mut_mean_aff	mean_neopitope_ratio	wt_median_aff	mut_median_aff	neoepitope_ratio	dai_score
[truncated: 16,383 more rows]

[truncated: 3 more sheets: Predicted Kb Binding Affinity, Db Graph, Kb Graph]
